# Supplementary material for: Gold-catalyzed domino cyclization to diverse polyheterocyclic frameworks: mechanism, origin of the cooperative hydrogen bond, and role of π-stacking interactions
Source: Royal Society of Chemistry journal article supplement (doi:10.1039/d0cy00746c), 2020-01-01
Supplement: d0cy00746c1.pdf [file d0cy00746c1.pdf]

Supporting Information

# Gold-Catalyzed Domino Cyclization to Diverse Polyheterocyclic Frameworks: Mechanism, Origin of cooperative hydrogen bond, and Role of $\pi$ -stacking interactions

*Yunhe Li, Xiang Zhao\**

Institute for Chemical Physics & Department of Chemistry, School of Science, State Key Laboratory of Electrical Insulation and Power Equipment & MOE Key Laboratory for Nonequilibrium Synthesis and Modulation of Condensed Matter, Xi'an Jiaotong University, Xi'an710049, China

## Table of contents

|                                                                                                                          |           |
|--------------------------------------------------------------------------------------------------------------------------|-----------|
| <b>1. Optimized intermediates and transition structures in Fig. 1 in Fig. S1. ....</b>                                   | <b>S3</b> |
| <b>2. Optimized intermediates and transition structures in Fig. 3 in Fig. S2.....</b>                                    | <b>S4</b> |
| <b>3. Calculated energy profiles for the synthesis of (benzo)furans-annulated tricyclic heterocycles in Fig. S3.....</b> | <b>S4</b> |
| <b>4. Optimized intermediates and transition structures in Fig. S3 in Fig. S4.....</b>                                   | <b>S5</b> |
| <b>5. Calculated energy profiles for the synthesis of pyrazoles-annulated tricyclic heterocycles in Fig. S5.....</b>     | <b>S6</b> |
| <b>6. Optimized intermediates and transition structures in Fig. S5 in Fig. S6.....</b>                                   | <b>S7</b> |
| <b>7. Calculated energy profiles for the synthesis of indole-annulated tricyclic</b>                                     |           |

|                                                                                                            |     |
|------------------------------------------------------------------------------------------------------------|-----|
| heterocycles in Fig. S7.....                                                                               | S7  |
| 8. Optimized intermediates and transition structures in Fig. S7 in Fig. S8.....                            | S8  |
| 9. Calculated energy profiles for the synthesis of indole-annulated tricyclic heterocycles in Fig. S9..... | S9  |
| 10. Optimized intermediates and transition structures in Fig. S9 in Fig.S10.....                           | S10 |
| 11. Thermodynamic properties of the structures in Table S1 .....                                           | S10 |
| 12. Thermodynamic properties of the structures in Table S2.....                                            | S11 |
| 13. Thermodynamic properties of the structures in Table S3 .....                                           | S12 |
| 14. Thermodynamic properties of the structures in Table S4.....                                            | S13 |
| 15. Cartesian coordinates of the stationary points discussed in the text.....                              | S14 |

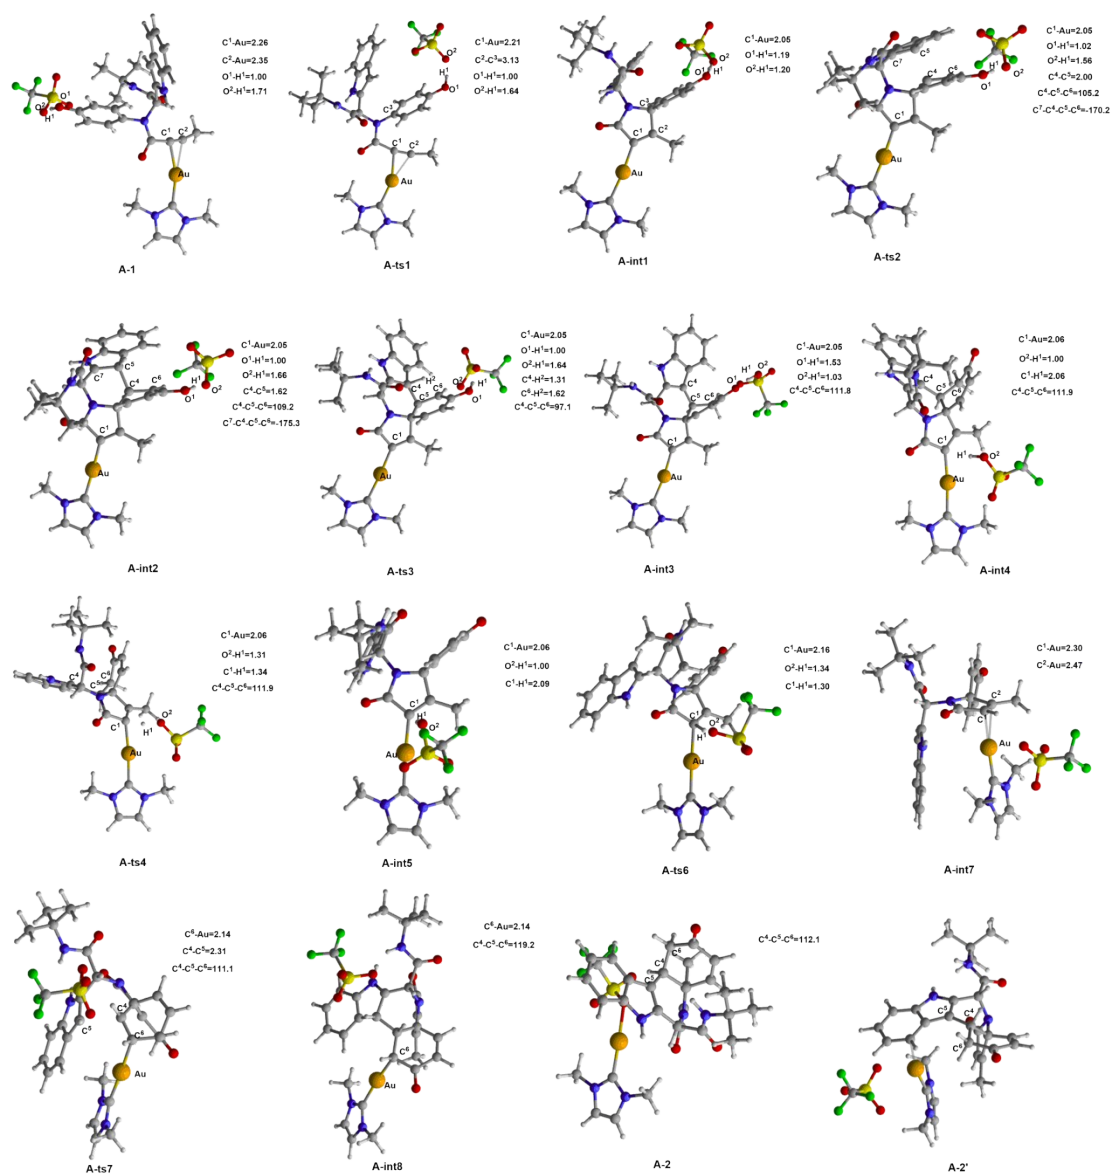

**Fig. S1.** Optimized geometries for the TSs and intermediates shown in Figure. 1.

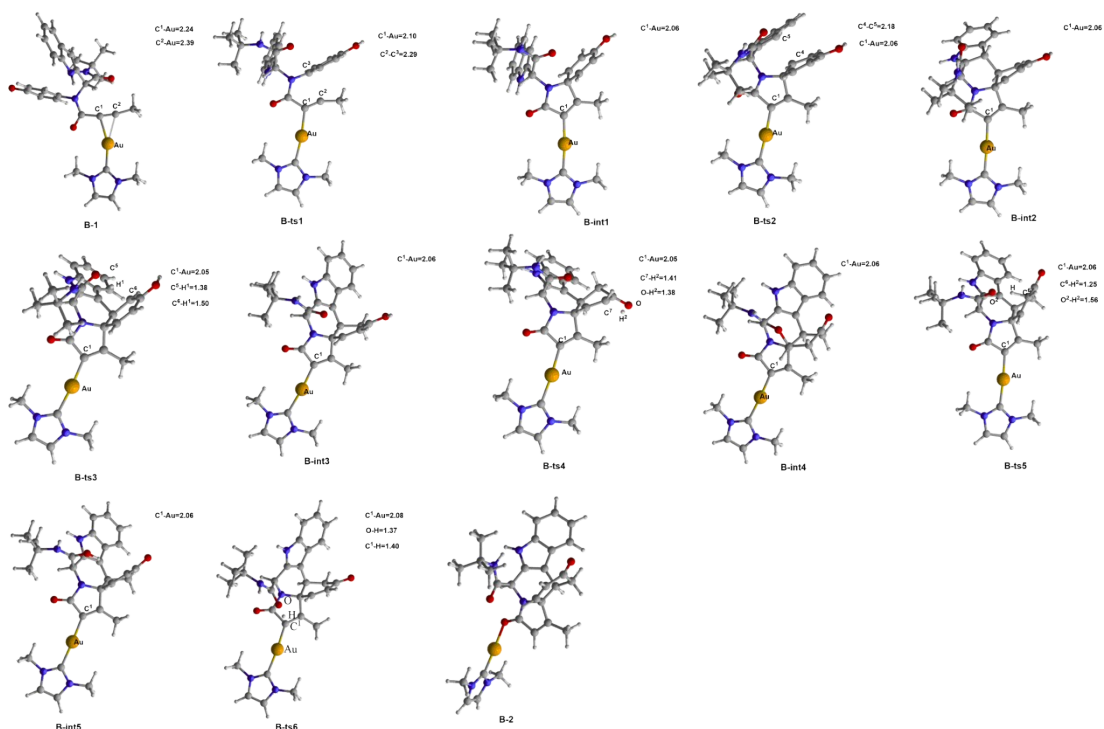

**Fig. S2.** Optimized geometries of transition states and intermediates shown in Fig. 3.

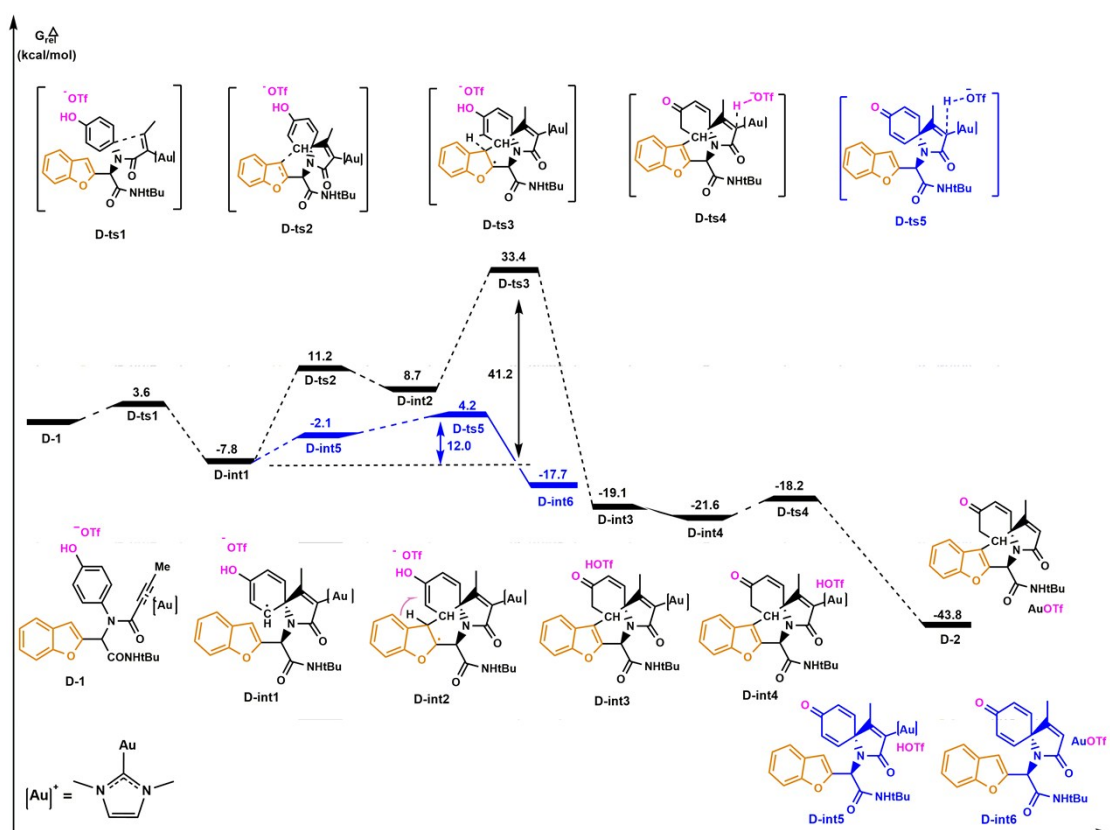

**Fig. S3.** Calculated energy profiles for the synthesis of (benzo)furans-annulated tricyclic heterocycles.

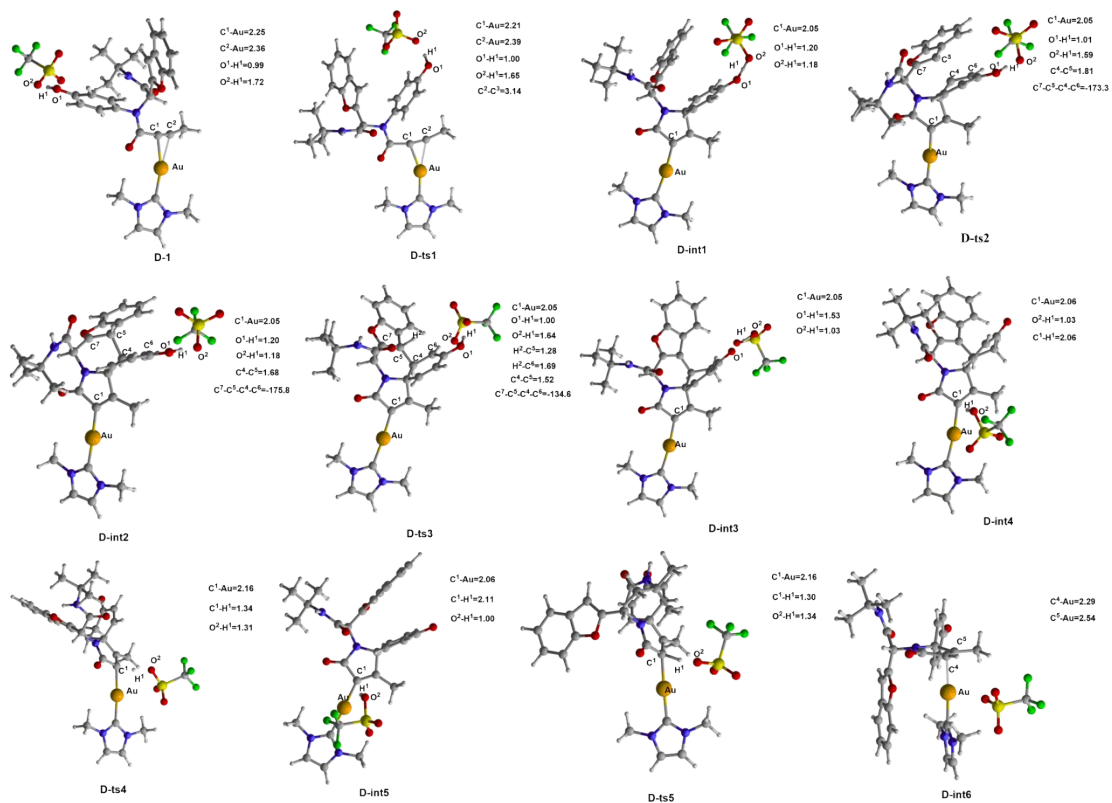

**Fig. S4** Optimized geometries of transition states and intermediates shown in Fig. S3.

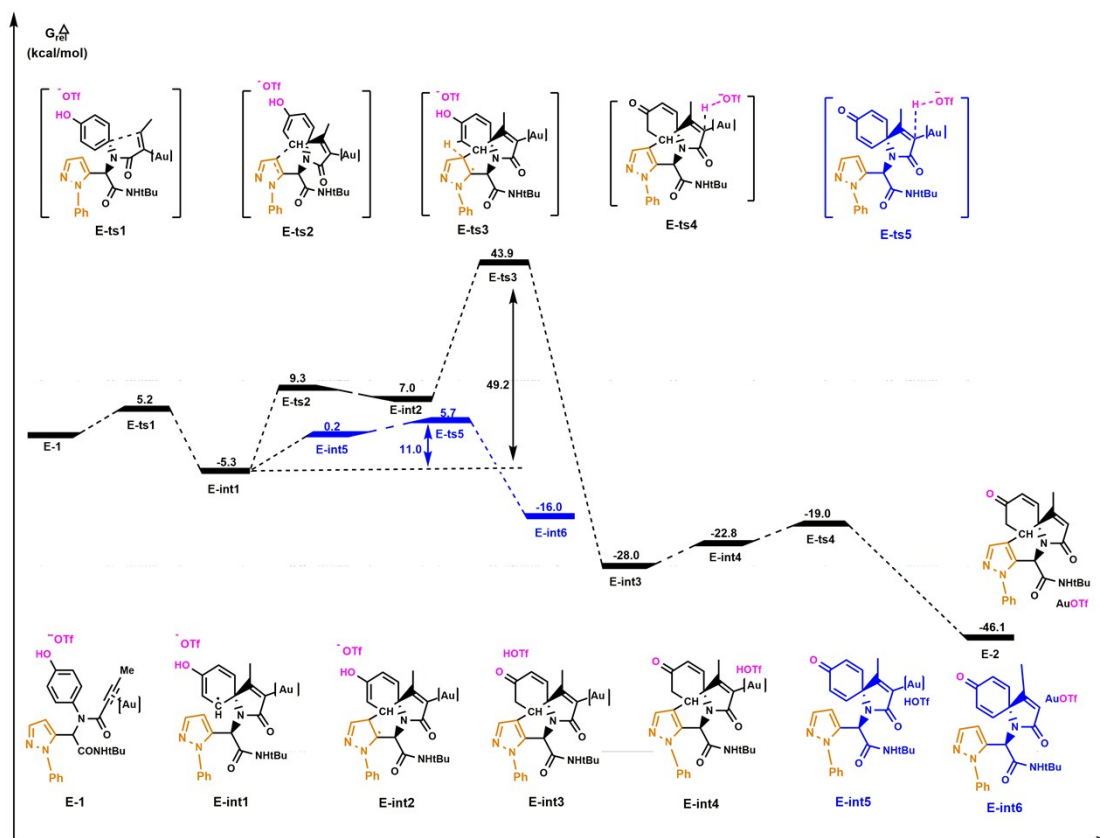

**Fig. S5.** Calculated energy profiles for the synthesis of pyrazoles-annulated tricyclic heterocycles.

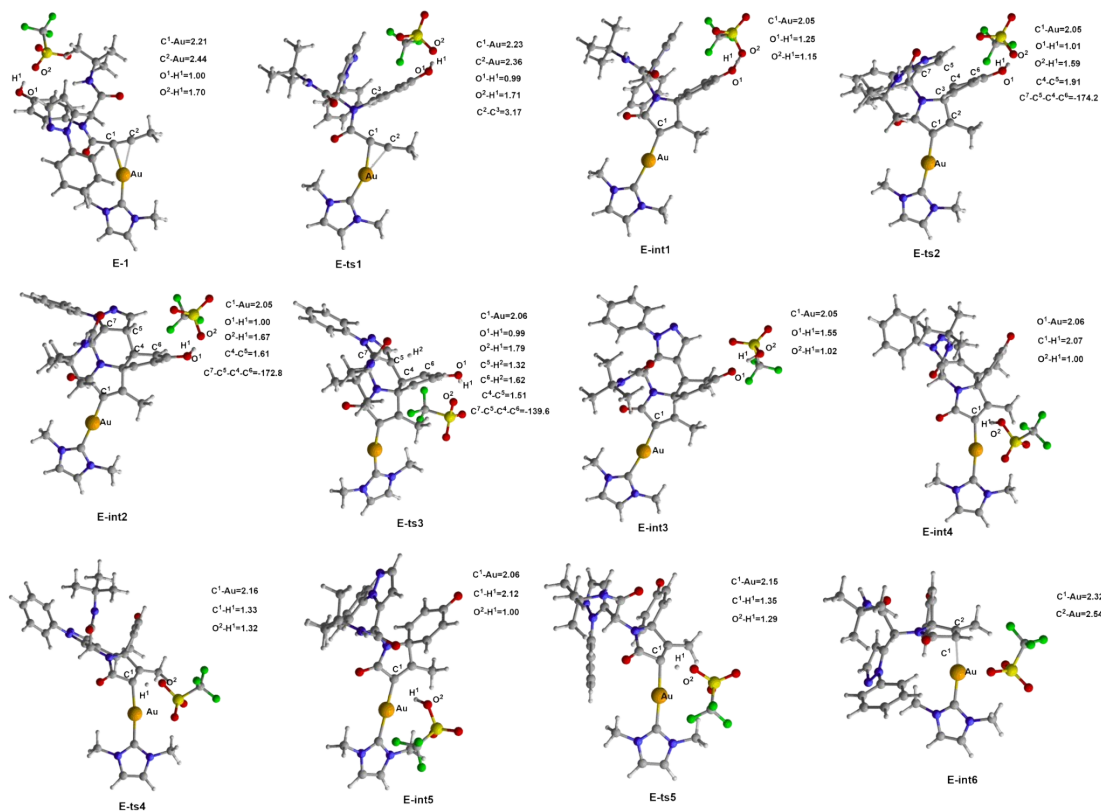

**Fig. S6.** Optimized geometries of transition states and intermediates shown in Fig. S5.

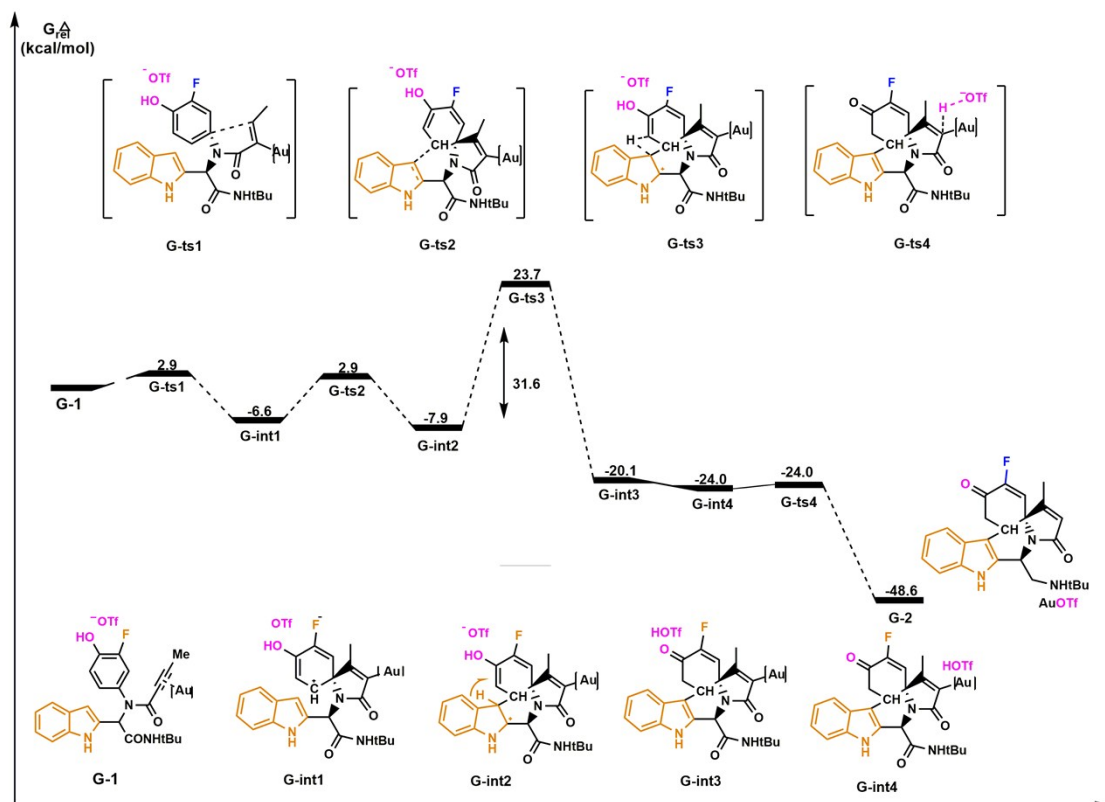

**Fig. S7.** Calculated energy profiles for the synthesis of indole-annulated tricyclic heterocycles.

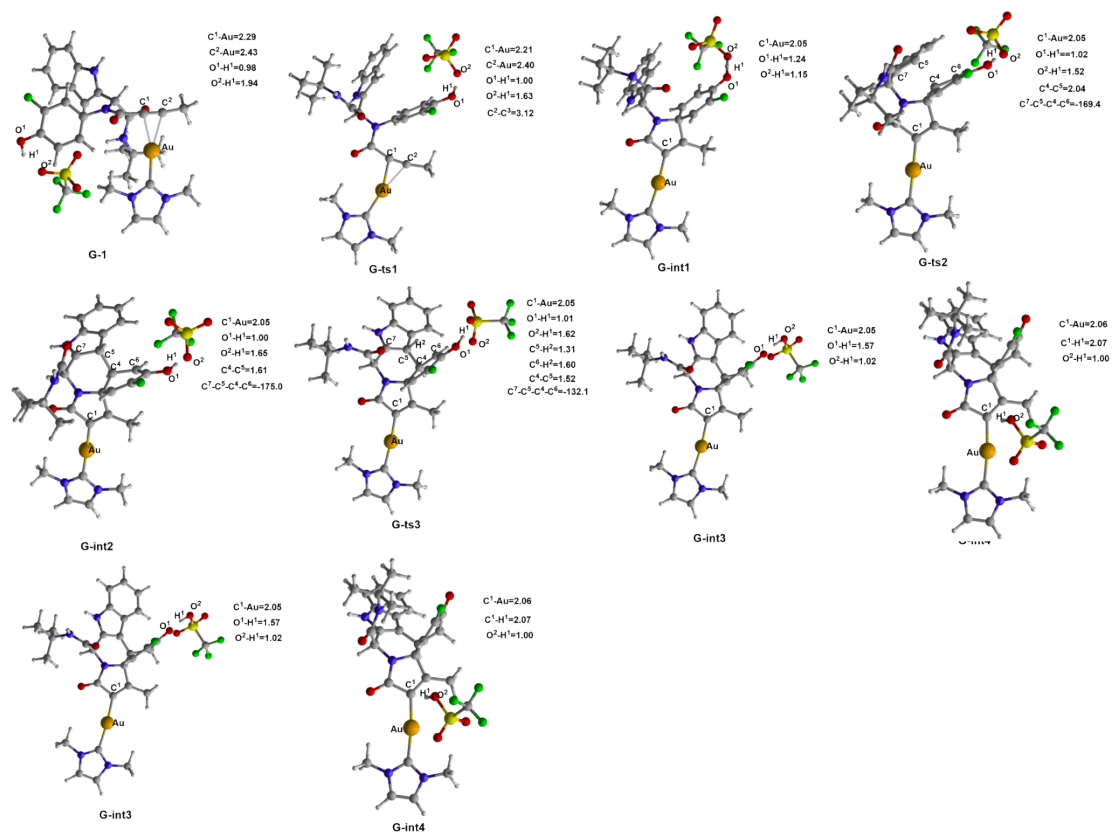

**Fig. S8.** Optimized geometries of transition states and intermediates shown in Fig. S7.



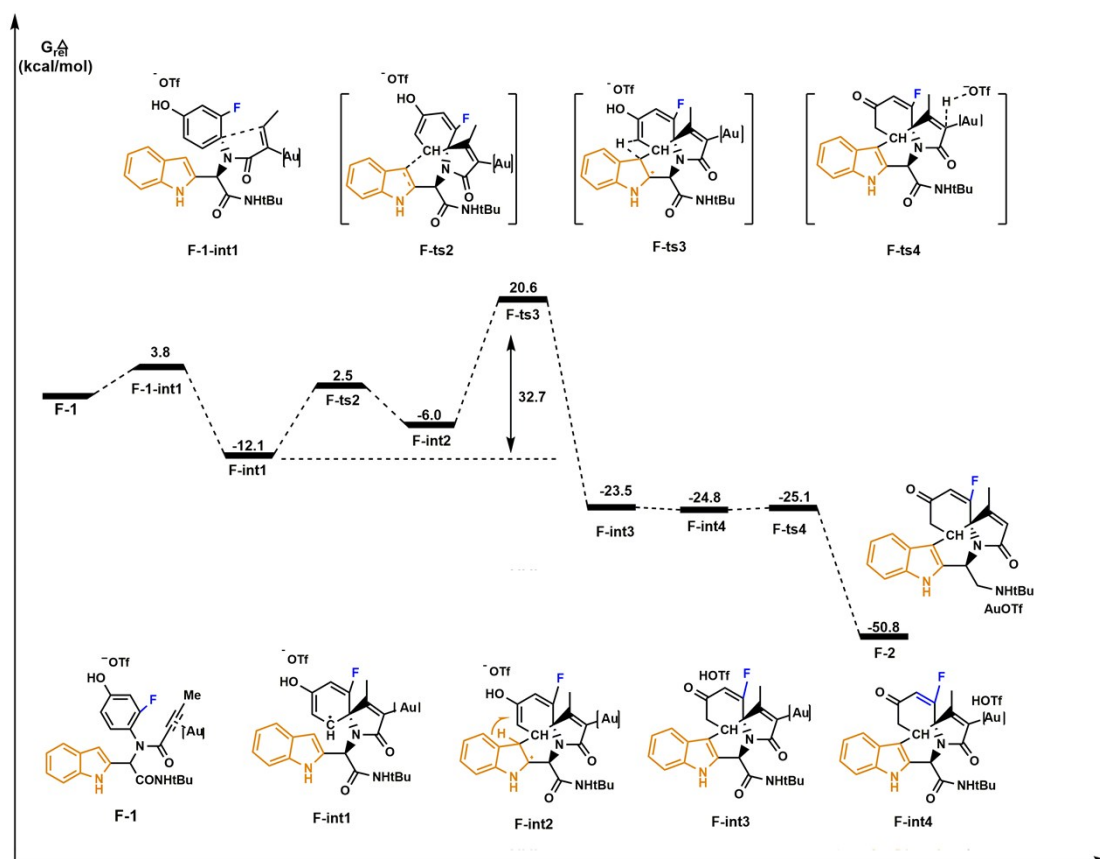

**Fig. S9.** Calculated energy profiles for the synthesis of indole-annulated tricyclic heterocycles.

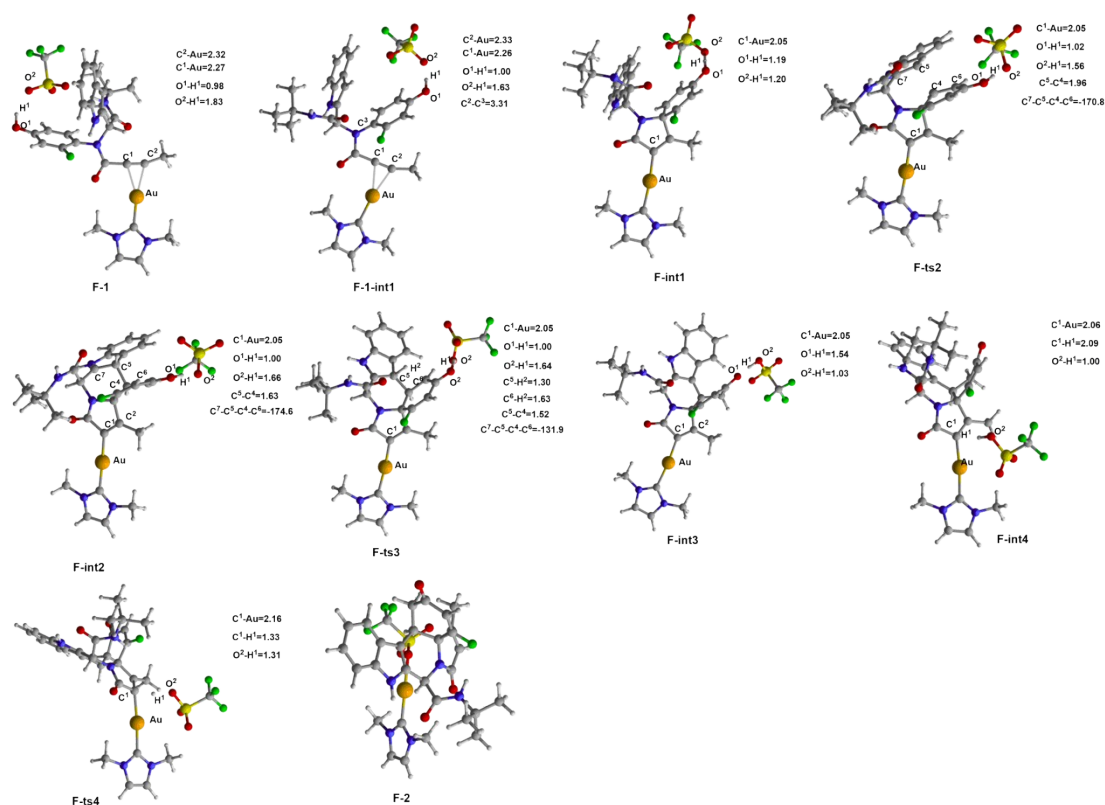

**Figure. S10** Optimized geometries of transition states and intermediates shown in Figure. S9.

Table S1. Thermodynamic properties (relative free energies and activation free energies in gas phase and in solution) of the structures in Fig. 1.

| System        | $\Delta E^{\text{rel}}_{\text{gas}}$ | $\Delta G^{\text{rel}}_{\text{gas}}$ | $\Delta E^{\ddagger}_{\text{gas}}$ | $\Delta G^{\ddagger}_{\text{gas}}$ | $\Delta E^{\text{rel}}_{\text{sol}}$ | $\Delta G^{\text{rel}}_{\text{sol}}$ | $\Delta E^{\ddagger}_{\text{sol}}$ | $\Delta G^{\ddagger}_{\text{sol}}$ |
|---------------|--------------------------------------|--------------------------------------|------------------------------------|------------------------------------|--------------------------------------|--------------------------------------|------------------------------------|------------------------------------|
| <b>A-1</b>    | 0                                    | 0                                    |                                    |                                    | 0                                    | 0                                    |                                    |                                    |
| <b>A-ts1</b>  | 6.6                                  | 7.7                                  | 6.6                                | 7.7                                | 2.8                                  | 5.1                                  | 2.8                                | 5.1                                |
| <b>A-int1</b> | -25.9                                | -23.5                                |                                    |                                    | -5.3                                 | -8.1                                 |                                    |                                    |
| <b>A-ts2</b>  | -9.4                                 | -5.8                                 | 16.6                               | 17.6                               | 4.0                                  | 3.2                                  | 9.4                                | 11.2                               |
| <b>A-int2</b> | -11.5                                | -8.4                                 |                                    |                                    | -5.2                                 | -4.3                                 |                                    |                                    |
| <b>A-ts3</b>  | 15.7                                 | 17.8                                 | 27.2                               | 26.1                               | 28.2                                 | 25.2                                 | 33.4                               | 29.4                               |
| <b>A-int3</b> | -39.2                                | -37.0                                |                                    |                                    | -19.0                                | -20.4                                |                                    |                                    |
| <b>A-int4</b> | -39.1                                | -36.7                                |                                    |                                    | -20.2                                | -21.7                                |                                    |                                    |
| <b>A-ts4</b>  | -33.4                                | -31.2                                | 5.7                                | 5.5                                | -14.3                                | -19.9                                | 5.8                                | 1.8                                |

|               |       |       |      |      |       |       |      |      |
|---------------|-------|-------|------|------|-------|-------|------|------|
| <b>A-2</b>    | -60.8 | -56.4 |      |      | -44.7 | -42.8 |      |      |
| <b>A-ts8</b>  | 30.5  | 34.0  | 42.0 | 42.4 | 45.6  | 44.3  | 50.7 | 48.6 |
| <b>A-int8</b> | -30.7 | -27.3 |      |      | -22.1 | -19.2 |      |      |
| <b>A-ts9</b>  | -29.4 | -25.5 | 1.3  | 1.7  | -11.8 | -13.5 | 10.3 | 5.7  |
| <b>A-int9</b> | -48.4 | -42.5 |      |      | -27.1 | -25.4 |      |      |
| <b>A-int5</b> | -19.6 | -16.9 |      |      | 0.5   | 0.3   |      |      |
| <b>A-ts5</b>  | -13.8 | -9.6  | 5.8  | 7.2  | 5.3   | 2.8   | 4.8  | 2.5  |
| <b>A-int6</b> | -33.8 | -31.2 |      |      | -18.8 | -19.4 |      |      |
| <b>A-ts6</b>  | 10.9  | 16.4  | 44.7 | 47.6 | 23.6  | 25.8  | 42.4 | 45.2 |
| <b>A-int7</b> | -18.7 | -13.0 |      |      | -7.2  | -3.2  |      |      |
| <b>A-ts7</b>  | 57.5  | 65.1  | 76.2 | 78.1 | 68.5  | 69.5  | 75.7 | 72.7 |
| <b>A-2'</b>   | -36.9 | -30.5 |      |      | -23.7 | -21.3 |      |      |

Table S2. Thermodynamic properties (relative free energies and activation free energies in gas phase and in solution) of the structures in Fig. 3.

| <b>System</b> | $\Delta E^{\text{rel}}_{\text{gas}}$ | $\Delta G^{\text{rel}}_{\text{gas}}$ | $\Delta E^{\ddagger}_{\text{gas}}$ | $\Delta G^{\ddagger}_{\text{gas}}$ | $\Delta E^{\text{rel}}_{\text{sol}}$ | $\Delta G^{\text{rel}}_{\text{sol}}$ | $\Delta E^{\ddagger}_{\text{sol}}$ | $\Delta G^{\ddagger}_{\text{sol}}$ |
|---------------|--------------------------------------|--------------------------------------|------------------------------------|------------------------------------|--------------------------------------|--------------------------------------|------------------------------------|------------------------------------|
| <b>B-1</b>    | 0                                    | 0                                    |                                    |                                    | 0                                    | 0                                    |                                    |                                    |
| <b>B-ts1</b>  | 6.8                                  | 6.2                                  | 6.8                                | 6.2                                | 12.2                                 | 9.4                                  | 12.2                               | 9.4                                |
| <b>B-int1</b> | -4.1                                 | -2.8                                 |                                    |                                    | 0.8                                  | 0.7                                  |                                    |                                    |
| <b>B-ts2</b>  | 4.7                                  | 6.9                                  | 8.8                                | 9.6                                | 11.2                                 | 10.6                                 | 10.4                               | 9.9                                |
| <b>B-int2</b> | -3.9                                 | -1.4                                 |                                    |                                    | -1.3                                 | -0.2                                 |                                    |                                    |
| <b>B-ts3</b>  | 25.5                                 | 27.6                                 | 29.4                               | 29.0                               | 33.1                                 | 29.8                                 | 34.3                               | 30.0                               |
| <b>B-int3</b> | -14.2                                | -12.4                                |                                    |                                    | -11.7                                | -11.8                                |                                    |                                    |
| <b>B-ts4</b>  | 41.2                                 | 44.6                                 | 55.4                               | 57.0                               | 50.4                                 | 46.3                                 | 62.0                               | 58.1                               |
| <b>B-int4</b> | -15.9                                | -13.5                                |                                    |                                    | -14.7                                | -15.3                                |                                    |                                    |
| <b>B-ts5</b>  | 9.5                                  | 12.4                                 | 25.4                               | 25.9                               | 15.9                                 | 12.4                                 | 30.6                               | 27.6                               |

|               |       |       |      |      |       |       |      |      |
|---------------|-------|-------|------|------|-------|-------|------|------|
| <b>B-int5</b> | -12.6 | -11.5 |      |      | -11.6 | -12.7 |      |      |
| <b>B-ts6</b>  | 32.9  | 35.3  | 45.5 | 25.9 | 40.8  | 35.9  | 52.4 | 48.7 |
| <b>B-2</b>    | -42.8 | -41.3 |      |      | -40.9 | -41.3 |      |      |

Table S3. Thermodynamic properties (relative free energies and activation free energies in gas phase and in solution) of the structures in Fig S3 and S5.

| <b>System</b> | $\Delta E^{\text{rel}}_{\text{gas}}$ | $\Delta G^{\text{rel}}_{\text{gas}}$ | $\Delta E^{\ddagger}_{\text{gas}}$ | $\Delta G^{\ddagger}_{\text{gas}}$ | $\Delta E^{\text{rel}}_{\text{sol}}$ | $\Delta G^{\text{rel}}_{\text{sol}}$ | $\Delta E^{\ddagger}_{\text{sol}}$ | $\Delta G^{\ddagger}_{\text{sol}}$ |
|---------------|--------------------------------------|--------------------------------------|------------------------------------|------------------------------------|--------------------------------------|--------------------------------------|------------------------------------|------------------------------------|
| <b>D-1</b>    | 0                                    | 0                                    |                                    |                                    | 0                                    | 0                                    |                                    |                                    |
| <b>D-ts1</b>  | 4.3                                  | 5.4                                  | 4.3                                | 5.4                                | 1.9                                  | 3.6                                  | 1.9                                | 3.6                                |
| <b>D-int1</b> | -24.0                                | -21.6                                |                                    |                                    | -4.9                                 | -7.8                                 |                                    |                                    |
| <b>D-ts2</b>  | -1.4                                 | 2.9                                  | 22.7                               | 24.5                               | 11.8                                 | 11.2                                 | 16.7                               | 18.9                               |
| <b>D-int2</b> | -1.4                                 | 1.7                                  |                                    |                                    | 10.0                                 | 8.7                                  |                                    |                                    |
| <b>D-ts3</b>  | 22.4                                 | 24.9                                 | 23.8                               | 23.2                               | 37.0                                 | 33.4                                 | 27.0                               | 24.7                               |
| <b>D-int3</b> | -38.4                                | -35.1                                |                                    |                                    | -18.6                                | -19.1                                |                                    |                                    |
| <b>D-int4</b> | -39.7                                | -37.2                                |                                    |                                    | -19.5                                | -21.6                                |                                    |                                    |
| <b>D-ts4</b>  | -33.3                                | -30.3                                | 6.4                                | 6.9                                | -12.9                                | -18.2                                | 6.5                                | 3.5                                |
| <b>D-2</b>    | -64.1                                | -58.1                                |                                    |                                    | -47.1                                | -43.8                                |                                    |                                    |
| <b>D-int5</b> | -20.1                                | -16.8                                |                                    |                                    | -2.0                                 | -2.1                                 |                                    |                                    |
| <b>D-ts5</b>  | -9.8                                 | -6.3                                 | 10.3                               | 10.5                               | 7.4                                  | 4.2                                  | 9.5                                | 6.3                                |
| <b>D-int6</b> | -33.3                                | -29.1                                |                                    |                                    | -18.4                                | -17.7                                |                                    |                                    |
| <b>E-1</b>    | 0                                    | 0                                    |                                    |                                    | 0                                    | 0                                    |                                    |                                    |
| <b>E-ts1</b>  | 6.9                                  | 6.9                                  | 6.9                                | 6.9                                | 4.5                                  | 5.2                                  | 4.5                                | 5.2                                |
| <b>E-int1</b> | -22.4                                | -20.9                                |                                    |                                    | -1.7                                 | -5.3                                 |                                    |                                    |
| <b>E-ts2</b>  | -0.9                                 | -0.6                                 | 21.5                               | 20.3                               | 13.5                                 | 9.3                                  | 15.2                               | 14.7                               |
| <b>E-int2</b> | -2.5                                 | -1.4                                 |                                    |                                    | 9.2                                  | 7.0                                  |                                    |                                    |
| <b>E-ts3</b>  | 28.5                                 | 32.9                                 | 31.0                               | 34.3                               | 45.5                                 | 43.9                                 | 36.3                               | 36.9                               |

|               |       |       |     |     |       |       |     |     |
|---------------|-------|-------|-----|-----|-------|-------|-----|-----|
| <b>E-int3</b> | -45.7 | -45.2 |     |     | -24.5 | -28.0 |     |     |
| <b>E-int4</b> | -39.9 | -39.1 |     |     | -18.9 | -22.8 |     |     |
| <b>E-ts4</b>  | -33.6 | -31.7 | 6.3 | 7.5 | -12.8 | -19.0 | 6.2 | 3.8 |
| <b>E-2</b>    | -61.3 | -60.1 |     |     | -44.0 | -46.1 |     |     |
| <b>E-int5</b> | -16.5 | -16.2 |     |     | 2.6   | 0.2   |     |     |
| <b>E-ts5</b>  | -11.5 | -8.0  | 5.1 | 8.2 | 9.5   | 5.7   | 7.0 | 5.4 |
| <b>E-int6</b> | -29.9 | -27.7 |     |     | -13.3 | -8.0  |     |     |

Table S4. Thermodynamic properties (relative free energies and activation free energies in gas phase and in solution) of the structures in Fig. S7 and S9.

| <b>System</b>   | $\Delta E^{\text{rel}}_{\text{gas}}$ | $\Delta G^{\text{rel}}_{\text{gas}}$ | $\Delta E^{\ddagger}_{\text{gas}}$ | $\Delta G^{\ddagger}_{\text{gas}}$ | $\Delta E^{\text{rel}}_{\text{sol}}$ | $\Delta G^{\text{rel}}_{\text{sol}}$ | $\Delta E^{\ddagger}_{\text{sol}}$ | $\Delta G^{\ddagger}_{\text{sol}}$ |
|-----------------|--------------------------------------|--------------------------------------|------------------------------------|------------------------------------|--------------------------------------|--------------------------------------|------------------------------------|------------------------------------|
| <b>F-1</b>      | 0                                    | 0                                    |                                    |                                    | 0                                    | 0                                    |                                    |                                    |
| <b>F-1-int1</b> | 12.4                                 | 12.1                                 | 12.4                               | 12.1                               | 3.5                                  | 3.8                                  | 3.5                                | 3.8                                |
| <b>F-int1</b>   | -24.4                                | -22.1                                |                                    |                                    | -8.6                                 | -12.1                                |                                    |                                    |
| <b>F-ts2</b>    | -4.8                                 | -0.8                                 | 19.6                               | 21.2                               | 2.8                                  | 2.5                                  | 11.4                               | 14.6                               |
| <b>F-int2</b>   | -6.8                                 | -4.9                                 |                                    |                                    | -4.7                                 | -6.0                                 |                                    |                                    |
| <b>F-ts3</b>    | 18.1                                 | 19.6                                 | 25.0                               | 24.5                               | 24.8                                 | 20.6                                 | 29.5                               | 26.6                               |
| <b>F-int3</b>   | -35.7                                | -33.8                                |                                    |                                    | -21.3                                | -23.5                                |                                    |                                    |
| <b>F-int4</b>   | -36.8                                | -34.1                                |                                    |                                    | -22.9                                | -24.8                                |                                    |                                    |
| <b>F-ts4</b>    | -36.9                                | -33.9                                | -0.1                               | 0.2                                | -19.8                                | -25.1                                | 3.2                                | -0.3                               |
| <b>F-2</b>      | -65.4                                | -61.5                                |                                    |                                    | -50.5                                | -50.8                                |                                    |                                    |
| <b>G-1</b>      | 0                                    | 0                                    |                                    |                                    | 0                                    | 0                                    |                                    |                                    |
| <b>G-ts1</b>    | 18.6                                 | 15.2                                 | 18.6                               | 15.2                               | 6.6                                  | 2.9                                  | 6.6                                | 2.9                                |
| <b>G-int1</b>   | -11.7                                | -13.2                                |                                    |                                    | 1.1                                  | -6.6                                 |                                    |                                    |
| <b>G-ts2</b>    | 3.3                                  | 2.7                                  | 15.0                               | 15.9                               | 9.6                                  | 2.9                                  | 8.5                                | 9.5                                |
| <b>G-int2</b>   | -0.3                                 | -2.6                                 |                                    |                                    | -1.4                                 | -7.9                                 |                                    |                                    |

|               |       |       |      |      |       |       |      |      |
|---------------|-------|-------|------|------|-------|-------|------|------|
| <b>G-ts3</b>  | 28.8  | 25.7  | 29.1 | 28.3 | 33.7  | 23.7  | 35.1 | 31.6 |
| <b>G-int3</b> | -25.7 | -27.4 |      |      | -13.8 | -20.1 |      |      |
| <b>G-int4</b> | -28.1 | -29.7 |      |      | -16.7 | -24.0 |      |      |
| <b>G-ts4</b>  | -27.1 | -28.6 | 1.0  | 1.2  | -13.2 | -24.0 | 3.4  | 0.0  |
| <b>G-2</b>    | -54.0 | -54.4 |      |      | -43.7 | -48.6 |      |      |

### The Cartesian coordinates of the stationary points discussed in the text

#### A-1

|    |            |            |            |
|----|------------|------------|------------|
| Au | -4.5596240 | -0.9173015 | 0.1949800  |
| C  | -6.5654250 | -3.7707185 | -2.1715240 |
| C  | -7.6176440 | -3.4028225 | -1.4018710 |
| H  | -6.4886340 | -4.4881735 | -2.9757720 |
| H  | -8.6471540 | -3.7304695 | -1.3973900 |
| C  | -5.8384770 | -2.2060245 | -0.7423500 |
| N  | -7.1515840 | -2.4382125 | -0.5290260 |
| N  | -5.4817990 | -3.0251845 | -1.7542550 |
| C  | 5.9659210  | -4.5128625 | -0.0280270 |
| F  | 6.3754830  | -4.3906565 | 1.2323020  |
| F  | 7.0263320  | -4.4315535 | -0.8243440 |
| F  | 5.4184500  | -5.7159235 | -0.1753990 |
| S  | 4.7536720  | -3.1979505 | -0.4284200 |
| O  | 3.6510210  | -3.4425615 | 0.5110830  |
| O  | 4.4198720  | -3.5051375 | -1.8465070 |
| O  | 5.4927440  | -1.9464965 | -0.2455510 |
| C  | -7.9751840 | -1.7795315 | 0.4698830  |
| H  | -7.3697550 | -1.0284365 | 0.9820520  |

|   |            |            |            |
|---|------------|------------|------------|
| H | -8.8255440 | -1.2880265 | -0.0107820 |
| H | -8.3384700 | -2.5082305 | 1.1999870  |
| C | -4.1377650 | -3.1536645 | -2.3146070 |
| H | -4.2136510 | -3.2433135 | -3.4007180 |
| H | -3.5433990 | -2.2675195 | -2.0711620 |
| H | -3.6480770 | -4.0428825 | -1.9082330 |
| C | 2.7746560  | 6.6407745  | -1.1909390 |
| C | 1.6553470  | 6.7663875  | -2.0319620 |
| C | 0.6170380  | 5.8504135  | -1.9911910 |
| C | 0.7286230  | 4.7980535  | -1.0832200 |
| C | 1.8489480  | 4.6466455  | -0.2335610 |
| C | 2.8803590  | 5.5927955  | -0.2939080 |
| N | -0.1348620 | 3.7589065  | -0.8102380 |
| C | 0.4348920  | 2.9320115  | 0.1455530  |
| C | 1.6357480  | 3.4583175  | 0.5361230  |
| C | -0.3318770 | 1.7384905  | 0.6007930  |
| N | -0.6275790 | 0.8235465  | -0.5396340 |
| C | -1.8220560 | 0.1832815  | -0.6321630 |
| C | 0.4722010  | 0.2839375  | -1.3039430 |
| O | -2.1648310 | -0.5658115 | -1.5399810 |
| C | -2.7305370 | 0.3651195  | 0.5189780  |
| C | -3.2406380 | 0.3887265  | 1.6431440  |
| C | 1.1994810  | 1.0564375  | -2.2095210 |
| C | 2.3143060  | 0.5180645  | -2.8322810 |
| C | 2.7213870  | -0.7994145 | -2.5692500 |
| C | 1.9611620  | -1.5824795 | -1.6808810 |
| C | 0.8603690  | -1.0345795 | -1.0534360 |

|   |            |            |            |
|---|------------|------------|------------|
| O | 3.8065710  | -1.2530585 | -3.1823940 |
| H | -1.3046350 | 2.0885805  | 0.9703030  |
| C | 0.2742190  | 0.9630005  | 1.7841920  |
| O | -0.4329650 | 0.7290645  | 2.7641510  |
| N | 1.5452260  | 0.5684595  | 1.6220970  |
| C | 2.3333930  | -0.2877845 | 2.5469710  |
| C | 1.7324080  | -1.6883365 | 2.5871100  |
| C | 3.7369240  | -0.3326475 | 1.9631530  |
| C | 2.3560250  | 0.3500695  | 3.9310750  |
| C | -3.5812840 | 0.5991145  | 3.0391070  |
| H | 3.5702720  | 7.3792875  | -1.2524100 |
| H | 1.6037510  | 7.5990935  | -2.7295310 |
| H | -0.2496960 | 5.9483975  | -2.6414630 |
| H | 3.7515950  | 5.4968235  | 0.3501950  |
| H | -0.9515580 | 3.5217105  | -1.3526560 |
| H | 2.2925610  | 3.0476715  | 1.2930420  |
| H | 0.9095150  | 2.0838925  | -2.4177270 |
| H | 2.9079970  | 1.1087895  | -3.5246230 |
| H | 2.2679810  | -2.6018635 | -1.4634850 |
| H | 0.3008350  | -1.6299995 | -0.3319860 |
| H | 4.0997270  | -2.1098265 | -2.7747760 |
| H | 1.9721680  | 0.7417945  | 0.7176780  |
| H | 1.8088830  | -2.1687825 | 1.6048500  |
| H | 2.3022720  | -2.3125295 | 3.2857640  |
| H | 0.6879770  | -1.6551695 | 2.9187800  |
| H | 4.3740250  | -0.9979555 | 2.5553040  |
| H | 4.1902620  | 0.6683005  | 1.9580930  |



|   |            |            |           |
|---|------------|------------|-----------|
| H | 3.7466660  | -0.7383715 | 0.9440390 |
| H | 3.0076520  | -0.2382485 | 4.5879920 |
| H | 1.3551310  | 0.3931175  | 4.3698350 |
| H | 2.7597850  | 1.3696825  | 3.8759830 |
| H | -2.6424890 | 0.8989255  | 3.5257370 |
| H | -3.9536430 | -0.3155185 | 3.5090590 |
| H | -4.3309950 | 1.3883495  | 3.1537120 |

Zero-point correction= 0.605583 (Hartree/Particle)

Thermal correction to Energy= 0.652639

Thermal correction to Enthalpy= 0.653583

Thermal correction to Gibbs Free Energy= 0.517094

Sum of electronic and zero-point Energies= -2719.313631

Sum of electronic and thermal Energies= -2719.266575

Sum of electronic and thermal Enthalpies= -2719.265631

Sum of electronic and thermal Free Energies= -2719.402120

### **A-ts1**

|   |            |            |            |
|---|------------|------------|------------|
| H | 1.0691106  | -4.3112216 | -1.0910048 |
| H | 2.7817036  | -4.5920766 | -1.4950978 |
| H | 2.2075416  | -4.8469256 | 0.1735782  |
| H | -0.2451254 | 5.4620804  | 0.6643222  |
| H | -0.4121524 | 3.7321934  | 0.9302662  |
| H | 1.0378506  | 4.3727354  | 0.0969292  |
| H | -2.7821784 | 4.3493084  | -1.9069758 |
| H | -2.6157434 | 3.5385274  | -0.3410188 |
| H | -2.5889884 | 5.3149244  | -0.4283808 |
| H | -0.8445984 | 5.5793374  | -2.9457278 |
| H | 0.7244756  | 5.6444924  | -2.1028248 |

|   |            |            |            |
|---|------------|------------|------------|
| H | -0.6803224 | 6.5276704  | -1.4616958 |
| H | -0.1761454 | 3.4246384  | -2.9043468 |
| H | -3.5024714 | -4.3158196 | -1.5804478 |
| H | -1.2493764 | -1.4292546 | 1.1315362  |
| H | -2.7499864 | -3.2399836 | 0.3125982  |
| H | -0.9977274 | -2.9342536 | -3.5863398 |
| H | 0.4449456  | -1.0349756 | -2.7869048 |
| H | 0.6542296  | 1.8935754  | 0.3670662  |
| H | -2.7706334 | 0.5786294  | -1.2285068 |
| H | -0.8206604 | 1.8770224  | 2.2887822  |
| H | -5.4230614 | 0.1970024  | 0.0751232  |
| H | -2.9830654 | 1.9244534  | 4.1129962  |
| H | -5.3975974 | 1.3454124  | 4.2290692  |
| H | -6.5911444 | 0.4772064  | 2.2480822  |
| C | 2.1009756  | -4.2259666 | -0.7208398 |
| C | -0.0473764 | 4.4795354  | 0.2197372  |
| C | -2.2772804 | 4.3927094  | -0.9348508 |
| C | -0.3624234 | 5.6052024  | -1.9597518 |
| C | -0.7628924 | 4.3895124  | -1.1236008 |
| N | -0.3190034 | 3.2216834  | -1.9208448 |
| O | 0.6164606  | 1.3039064  | -2.5925678 |
| C | 0.1032926  | 1.9455884  | -1.6887418 |
| O | -2.7177384 | -4.1701456 | -2.1780508 |
| C | -1.1862194 | -1.7713436 | 0.0991022  |
| C | -2.0099254 | -2.7897106 | -0.3443478 |
| C | -1.9476064 | -3.2090136 | -1.6865848 |
| C | -1.0203974 | -2.6048056 | -2.5504858 |

|    |            |            |            |
|----|------------|------------|------------|
| C  | -0.2229704 | -1.5612446 | -2.1098238 |
| C  | -0.3035684 | -1.1424526 | -0.7813648 |
| C  | 2.3201556  | -2.8213786 | -0.4299438 |
| C  | 2.2658606  | -1.6020926 | -0.2543428 |
| O  | 2.6443566  | 0.6937784  | 0.1369042  |
| C  | 1.8367236  | -0.1929316 | -0.1352378 |
| N  | 0.5113976  | -0.0471506 | -0.3192918 |
| C  | -0.0300064 | 1.3296094  | -0.2821858 |
| C  | -2.5959384 | 0.9282764  | -0.2159618 |
| C  | -1.3964464 | 1.3320114  | 0.3043882  |
| N  | -1.5616524 | 1.6224384  | 1.6548182  |
| C  | -4.9106304 | 0.6179384  | 0.9372502  |
| C  | -3.5537034 | 0.9608404  | 0.8466262  |
| C  | -2.8764354 | 1.4103124  | 2.0053432  |
| C  | -3.5184244 | 1.5706294  | 3.2339112  |
| C  | -4.8627214 | 1.2443164  | 3.2870162  |
| C  | -5.5473044 | 0.7644254  | 2.1559362  |
| Au | 4.4232526  | -1.8620886 | 0.1619312  |
| C  | 8.5265916  | -1.3210066 | 1.1595072  |
| C  | 8.1247926  | -0.0337486 | 1.0352362  |
| H  | 9.4874006  | -1.7474246 | 1.4092582  |
| H  | 8.6649346  | 0.8946784  | 1.1523992  |
| C  | 6.3483386  | -1.3364736 | 0.6202822  |
| N  | 6.7842236  | -0.0615696 | 0.7049882  |
| N  | 7.4201126  | -2.1080556 | 0.9010882  |
| C  | -6.1271754 | -2.8292156 | 1.0711342  |
| F  | -6.9731784 | -1.8011056 | 1.1733902  |

|   |            |            |            |
|---|------------|------------|------------|
| F | -5.0437154 | -2.5490826 | 1.7977732  |
| F | -6.7148184 | -3.8986496 | 1.5959302  |
| S | -5.6808114 | -3.1101066 | -0.6850708 |
| O | -6.9607084 | -3.3648586 | -1.3355658 |
| O | -4.7879014 | -4.2985876 | -0.5545928 |
| O | -4.9676384 | -1.8812006 | -1.0599658 |
| C | 5.9819716  | 1.1338004  | 0.4591272  |
| H | 4.9207216  | 0.8704224  | 0.3885772  |
| H | 6.1206496  | 1.8347254  | 1.2862842  |
| H | 6.2977196  | 1.6049034  | -0.4758028 |
| C | 7.4284586  | -3.5605546 | 0.9369392  |
| H | 7.7206696  | -3.9102696 | 1.9309432  |
| H | 6.4226716  | -3.9219456 | 0.7117662  |
| H | 8.1259976  | -3.9517646 | 0.1911522  |

Zero-point correction= 0.605864 (Hartree/Particle)

Thermal correction to Energy= 0.652766

Thermal correction to Enthalpy= 0.653710

Thermal correction to Gibbs Free Energy= 0.519208

Sum of electronic and zero-point Energies= -2719.303125

Sum of electronic and thermal Energies= -2719.256222

Sum of electronic and thermal Enthalpies= -2719.255278

Sum of electronic and thermal Free Energies= -2719.389781

### **A-int1**

|   |            |            |            |
|---|------------|------------|------------|
| H | 0.7481947  | -3.5140222 | -1.7896258 |
| H | 1.4961357  | -2.8440862 | -3.2366218 |
| H | 2.5157877  | -3.3191502 | -1.8599658 |
| H | -0.7324073 | 5.4620728  | 1.0292982  |

|   |            |            |            |
|---|------------|------------|------------|
| H | -0.6024583 | 3.7079778  | 1.0598712  |
| H | 0.3193137  | 4.6571398  | -0.1464918 |
| H | -3.9739613 | 4.3118528  | -0.4771838 |
| H | -3.0964643 | 3.3397668  | 0.7222452  |
| H | -3.2631643 | 5.0974448  | 0.9478052  |
| H | -2.7280973 | 5.8979318  | -2.0029568 |
| H | -0.9634993 | 6.0724058  | -1.8500788 |
| H | -2.0438893 | 6.6921518  | -0.5780768 |
| H | -2.2434513 | 3.7275918  | -2.4533958 |
| H | -3.9544683 | -3.1567132 | -2.2742458 |
| H | -0.5598373 | -1.4010922 | 0.3097392  |
| H | -2.5133913 | -2.6588152 | -0.5210978 |
| H | -1.5984453 | -1.4334292 | -4.5800028 |
| H | 0.3200127  | -0.0719762 | -3.7447978 |
| H | 0.3771757  | 2.4183288  | -0.2863338 |
| H | -3.1817643 | 0.7651368  | -0.3151838 |
| H | 0.3948737  | 1.1639588  | 1.8891822  |
| H | -4.7280143 | -0.5137522 | 1.8732902  |
| H | -0.4355803 | 0.0569918  | 4.4119332  |
| H | -2.4027343 | -1.0341812 | 5.4645782  |
| H | -4.5153883 | -1.3300472 | 4.2125382  |
| C | 1.5607357  | -2.8641942 | -2.1408078 |
| C | -0.6324473 | 4.5754668  | 0.3924802  |
| C | -3.1143203 | 4.3045298  | 0.2041492  |
| C | -1.8888013 | 5.8782608  | -1.2952498 |
| C | -1.8163193 | 4.5378928  | -0.5649098 |
| N | -1.6762943 | 3.5234408  | -1.6359878 |

|    |            |            |            |
|----|------------|------------|------------|
| O  | -1.3525853 | 1.6500798  | -2.8148988 |
| C  | -1.1582273 | 2.2713848  | -1.7775658 |
| O  | -3.1851653 | -2.7250712 | -3.0758408 |
| C  | -0.8128683 | -1.4128032 | -0.7502538 |
| C  | -1.8562043 | -2.1273972 | -1.2031648 |
| C  | -2.1728173 | -2.1270812 | -2.6156578 |
| C  | -1.3126333 | -1.4194322 | -3.5322828 |
| C  | -0.2932363 | -0.6696002 | -3.0752118 |
| C  | 0.1397697  | -0.6945012 | -1.6519648 |
| C  | 1.4684837  | -1.5001852 | -1.5595868 |
| C  | 2.4036157  | -0.8016712 | -0.8943268 |
| O  | 2.2495427  | 1.3347698  | 0.2619542  |
| C  | 1.7992127  | 0.4873418  | -0.5022918 |
| N  | 0.5545507  | 0.5988848  | -1.1199318 |
| C  | -0.3314093 | 1.6665548  | -0.6548018 |
| C  | -2.4820783 | 0.7741548  | 0.5142382  |
| C  | -1.1847743 | 1.2093268  | 0.4809652  |
| N  | -0.5847553 | 0.9827328  | 1.7087192  |
| C  | -3.8051463 | -0.3809412 | 2.4319482  |
| C  | -2.7062533 | 0.2360238  | 1.8208512  |
| C  | -1.4972283 | 0.3774298  | 2.5464032  |
| C  | -1.3679483 | -0.0629692 | 3.8642502  |
| C  | -2.4716773 | -0.6698982 | 4.4418172  |
| C  | -3.6751573 | -0.8332762 | 3.7326522  |
| Au | 4.3241077  | -1.2038502 | -0.3010758 |
| C  | 8.2054287  | -1.0069262 | 1.4817052  |
| C  | 8.3326097  | -2.2194362 | 0.8938102  |

|   |            |            |            |
|---|------------|------------|------------|
| H | 8.8938777  | -0.4333332 | 2.0856632  |
| H | 9.1539407  | -2.9214972 | 0.8796302  |
| C | 6.2693477  | -1.4435722 | 0.4071172  |
| N | 7.1385737  | -2.4683232 | 0.2417392  |
| N | 6.9380727  | -0.5483052 | 1.1733492  |
| C | -5.2954843 | -3.3811592 | 1.0018972  |
| F | -5.9245563 | -2.6542382 | 1.9193662  |
| F | -4.0035363 | -3.4342002 | 1.3129932  |
| F | -5.7903923 | -4.6068172 | 1.0125472  |
| S | -5.5256093 | -2.6060472 | -0.6467158 |
| O | -6.9540193 | -2.6411922 | -0.8853258 |
| O | -4.7425343 | -3.6096902 | -1.4918068 |
| O | -4.8370453 | -1.3197962 | -0.5707108 |
| C | 6.8581477  | -3.6736702 | -0.5160108 |
| H | 5.8477247  | -3.5940452 | -0.9242738 |
| H | 7.5722247  | -3.7796582 | -1.3381498 |
| H | 6.9167117  | -4.5526042 | 0.1329372  |
| C | 6.4033177  | 0.7296518  | 1.6158512  |
| H | 7.0111917  | 1.5488938  | 1.2206752  |
| H | 5.3788627  | 0.8319358  | 1.2458092  |
| H | 6.3969967  | 0.7751368  | 2.7088642  |

Zero-point correction= 0.606599 (Hartree/Particle)

Thermal correction to Energy= 0.652291

Thermal correction to Enthalpy= 0.653235

Thermal correction to Gibbs Free Energy= 0.522074

Sum of electronic and zero-point Energies= -2719.354932

Sum of electronic and thermal Energies= -2719.309240

Sum of electronic and thermal Enthalpies= -2719.308296

Sum of electronic and thermal Free Energies= -2719.439457

**A-ts2**

|   |            |            |            |
|---|------------|------------|------------|
| H | -0.5147945 | -2.2321666 | -2.1635532 |
| H | 0.0430225  | -1.0536756 | -3.3443852 |
| H | 1.2163895  | -2.1441446 | -2.5655052 |
| H | 3.0723355  | 3.8131204  | -1.7840462 |
| H | 1.8622175  | 2.5538094  | -1.4706462 |
| H | 1.5308035  | 3.8348384  | -2.6622062 |
| H | 1.5892955  | 4.8135684  | 1.5388008  |
| H | 2.1778685  | 3.2096354  | 1.0045308  |
| H | 3.1214985  | 4.6527774  | 0.6651398  |
| H | 1.1832505  | 6.6345014  | -0.2182432 |
| H | 1.0815495  | 6.1929784  | -1.9417262 |
| H | 2.6490665  | 6.1911994  | -1.1199642 |
| H | -0.6115475 | 5.0338054  | -1.0018512 |
| H | -4.4398515 | -1.2769916 | -2.8337082 |
| H | -1.2989775 | -0.9466996 | 0.5162478  |
| H | -3.3531295 | -1.5625616 | -0.7605422 |
| H | -2.4133985 | 1.4478004  | -3.6837212 |
| H | -0.3278115 | 2.0754094  | -2.4647782 |
| H | 0.3694485  | 2.5856674  | 1.5829418  |
| H | -3.2336565 | 1.4864214  | 0.3133048  |
| H | -0.2625035 | 0.9455994  | 3.1986978  |
| H | -5.0338975 | -0.7337826 | 1.3412078  |
| H | -1.5500435 | -0.8746786 | 4.9632788  |
| H | -3.5919955 | -2.2983666 | 5.0963568  |



|   |            |            |            |
|---|------------|------------|------------|
| H | -5.2983115 | -2.2274606 | 3.3103728  |
| C | 0.3108595  | -1.5503006 | -2.4034292 |
| C | 1.9966555  | 3.6181164  | -1.6922062 |
| C | 2.0970255  | 4.2677984  | 0.7333778  |
| C | 1.5843105  | 5.9685934  | -0.9916772 |
| C | 1.3962115  | 4.5030184  | -0.6014212 |
| N | -0.0735245 | 4.3229034  | -0.5171782 |
| O | -2.1475555 | 3.6784444  | 0.0450108  |
| C | -0.9447435 | 3.4769094  | 0.1043868  |
| O | -3.8449645 | -0.5323796 | -3.1846262 |
| C | -1.6663165 | -0.2740856 | -0.2654972 |
| C | -2.6799205 | -0.7874586 | -1.1165642 |
| C | -2.9192935 | -0.1816956 | -2.3369532 |
| C | -2.0885355 | 0.9301774  | -2.7848762 |
| C | -0.9741665 | 1.2678604  | -2.1259942 |
| C | -0.5183115 | 0.4903514  | -0.9331922 |
| C | 0.5487405  | -0.5732196 | -1.3108492 |
| C | 1.6193335  | -0.4988396 | -0.4936852 |
| O | 1.9944705  | 0.9306944  | 1.4555578  |
| C | 1.3776795  | 0.6084364  | 0.4473378  |
| N | 0.2480115  | 1.3012544  | 0.0014178  |
| C | -0.4019405 | 2.2679414  | 0.8697988  |
| C | -2.6212255 | 0.9332944  | 1.0172458  |
| C | -1.4546455 | 1.4999324  | 1.5831458  |
| N | -1.1617325 | 0.8722524  | 2.7370838  |
| C | -4.2806405 | -0.7655146 | 2.1277168  |
| C | -3.1369595 | 0.0246004  | 2.0404718  |

|    |            |            |            |
|----|------------|------------|------------|
| C  | -2.1785905 | -0.0315546 | 3.0676388  |
| C  | -2.3052225 | -0.8501456 | 4.1813498  |
| C  | -3.4488115 | -1.6371586 | 4.2451428  |
| C  | -4.4185725 | -1.5937396 | 3.2362438  |
| Au | 3.3086765  | -1.6481246 | -0.3181622 |
| C  | 6.9993955  | -3.4709926 | 0.8584448  |
| C  | 6.6994355  | -4.2906766 | -0.1760182 |
| H  | 7.8372925  | -3.4636196 | 1.5407788  |
| H  | 7.2210565  | -5.1456486 | -0.5817102 |
| C  | 5.0468895  | -2.7604726 | -0.0237202 |
| N  | 5.5023955  | -3.8398186 | -0.7022922 |
| N  | 5.9779265  | -2.5425906 | 0.9361348  |
| C  | -5.9785095 | -3.2570706 | 0.0586728  |
| F  | -6.6757155 | -2.9666556 | 1.1583668  |
| F  | -4.6833335 | -3.2816276 | 0.3955128  |
| F  | -6.3222315 | -4.4671976 | -0.3536972 |
| S  | -6.2899005 | -1.9952956 | -1.2383062 |
| O  | -7.6995735 | -2.1554546 | -1.5564702 |
| O  | -5.3333205 | -2.4355006 | -2.2980742 |
| O  | -5.8695185 | -0.7388626 | -0.6005592 |
| C  | 4.8259125  | -4.4525256 | -1.8312252 |
| H  | 3.9043755  | -3.8971596 | -2.0224782 |
| H  | 5.4615535  | -4.4142506 | -2.7208442 |
| H  | 4.5778735  | -5.4937116 | -1.6048802 |
| C  | 5.9196275  | -1.4762186 | 1.9218648  |
| H  | 6.7714245  | -0.8007726 | 1.7986398  |
| H  | 4.9917535  | -0.9154626 | 1.7777878  |

|   |           |            |           |
|---|-----------|------------|-----------|
| H | 5.9320635 | -1.8973786 | 2.9314558 |
|---|-----------|------------|-----------|

Zero-point correction= 0.609040 (Hartree/Particle)

Thermal correction to Energy= 0.653901

Thermal correction to Enthalpy= 0.654845

Thermal correction to Gibbs Free Energy= 0.526155

Sum of electronic and zero-point Energies= -2719.328549

Sum of electronic and thermal Energies= -2719.283688

Sum of electronic and thermal Enthalpies= -2719.282743

Sum of electronic and thermal Free Energies= -2719.411433

### **A-int2**

|   |            |            |            |
|---|------------|------------|------------|
| H | -0.4795616 | -2.4597267 | -1.7280215 |
| H | 0.0084474  | -1.4127587 | -3.0493445 |
| H | 1.2349184  | -2.4008867 | -2.2096805 |
| H | 3.2259794  | 3.3611613  | -2.1831665 |
| H | 1.9544274  | 2.2489393  | -1.6458575 |
| H | 1.6418744  | 3.3833973  | -2.9813755 |
| H | 2.0183784  | 4.9234533  | 1.0298035  |
| H | 2.4034664  | 3.2027143  | 0.7218205  |
| H | 3.4777944  | 4.4646433  | 0.1362535  |
| H | 1.6524114  | 6.5026723  | -0.9310745 |
| H | 1.4154664  | 5.8433823  | -2.5712765 |
| H | 3.0230014  | 5.8207433  | -1.8303345 |
| H | -0.2979046 | 5.0509613  | -1.2824525 |
| H | -4.1453586 | -1.7081917 | -2.7514785 |
| H | -1.2842946 | -0.7930927 | 0.7063565  |
| H | -3.2273386 | -1.6724387 | -0.5742795 |
| H | -2.2790976 | 1.0782173  | -3.7293725 |

|   |            |            |            |
|---|------------|------------|------------|
| H | -0.2524656 | 1.8794123  | -2.5316895 |
| H | 0.5338344  | 2.6512123  | 1.5141555  |
| H | -2.9057236 | 1.6706733  | -0.1460275 |
| H | -0.9523286 | 1.9422963  | 3.3934285  |
| H | -5.0125026 | -0.4376657 | 0.7289075  |
| H | -2.8356976 | 0.7329893  | 5.1111125  |
| H | -4.9472156 | -0.5982587 | 5.0362345  |
| H | -5.9941936 | -1.1742757 | 2.8706305  |
| C | 0.3275054  | -1.8021767 | -2.0748245 |
| C | 2.1467444  | 3.2614783  | -2.0146985 |
| C | 2.4229724  | 4.2124873  | 0.2980435  |
| C | 1.9535304  | 5.7074323  | -1.6239945 |
| C | 1.6791444  | 4.3276073  | -1.0282615 |
| N | 0.2045294  | 4.2866753  | -0.8421275 |
| O | -1.8150706 | 3.9882073  | 0.1066275  |
| C | -0.6532246 | 3.6196323  | -0.0313855 |
| O | -3.6150606 | -0.9640867 | -3.1519155 |
| C | -1.6621216 | -0.1480027 | -0.1022845 |
| C | -2.6089326 | -0.8775897 | -0.9818215 |
| C | -2.7790386 | -0.4561287 | -2.2607785 |
| C | -1.9691886 | 0.6515793  | -2.7778435 |
| C | -0.8811916 | 1.0873343  | -2.1301115 |
| C | -0.4341506 | 0.4136793  | -0.8610375 |
| C | 0.5893094  | -0.7089937 | -1.1040815 |
| C | 1.6728744  | -0.5831157 | -0.3062165 |
| O | 2.1402244  | 1.0635423  | 1.4403775  |
| C | 1.4869714  | 0.6277323  | 0.5015435  |

|    |            |            |            |
|----|------------|------------|------------|
| N  | 0.3528014  | 1.2941123  | 0.0068975  |
| C  | -0.2205076 | 2.3813913  | 0.7576905  |
| C  | -2.4462676 | 1.0597023  | 0.6382235  |
| C  | -1.4359346 | 1.8074713  | 1.3980245  |
| N  | -1.5984466 | 1.6112713  | 2.6845405  |
| C  | -4.5253756 | -0.1843957 | 1.6726315  |
| C  | -3.3462186 | 0.5425353  | 1.7122415  |
| C  | -2.7716166 | 0.8540813  | 2.9477335  |
| C  | -3.3051136 | 0.4733073  | 4.1655865  |
| C  | -4.4845306 | -0.2670137 | 4.1101795  |
| C  | -5.0795816 | -0.5872267 | 2.8886065  |
| Au | 3.3135394  | -1.7823937 | -0.0321645 |
| C  | 6.9239624  | -3.7193977 | 1.2251425  |
| C  | 6.5522054  | -4.5960697 | 0.2632785  |
| H  | 7.7765794  | -3.7103937 | 1.8889685  |
| H  | 7.0131974  | -5.5093237 | -0.0847515 |
| C  | 4.9961974  | -2.9612707 | 0.3268085  |
| N  | 5.3719034  | -4.1152137 | -0.2740395 |
| N  | 5.9609144  | -2.7276157 | 1.2490745  |
| C  | -5.7472516 | -3.4883137 | 0.3905365  |
| F  | -6.6771996 | -3.1778977 | 1.2961065  |
| F  | -4.5611106 | -3.1157227 | 0.8935985  |
| F  | -5.7323056 | -4.8039947 | 0.2370045  |
| S  | -6.0867036 | -2.6273577 | -1.1962785 |
| O  | -7.3421536 | -3.2103697 | -1.6461295 |
| O  | -4.8814786 | -2.9907577 | -1.9905345 |
| O  | -6.1064646 | -1.2101147 | -0.8027765 |

|   |           |            |            |
|---|-----------|------------|------------|
| C | 4.6346354 | -4.7711717 | -1.3390875 |
| H | 3.7462044 | -4.1746067 | -1.5609375 |
| H | 5.2531644 | -4.8452767 | -2.2384405 |
| H | 4.3257044 | -5.7726087 | -1.0252645 |
| C | 5.9863544 | -1.5884987 | 2.1504905  |
| H | 6.8826384 | -0.9864917 | 1.9734085  |
| H | 5.0990244 | -0.9766897 | 1.9654925  |
| H | 5.9770934 | -1.9305547 | 3.1896605  |

Zero-point correction= 0.610390 (Hartree/Particle)

Thermal correction to Energy= 0.655528

Thermal correction to Enthalpy= 0.656472

Thermal correction to Gibbs Free Energy= 0.526873

Sum of electronic and zero-point Energies= -2719.331945

Sum of electronic and thermal Energies= -2719.286807

Sum of electronic and thermal Enthalpies= -2719.285863

Sum of electronic and thermal Free Energies= -2719.415462

### **A-ts3**

|   |            |            |            |
|---|------------|------------|------------|
| H | -0.3372281 | -3.4298377 | -0.7626592 |
| H | 0.2277299  | -3.1261307 | -2.3996522 |
| H | 1.3718049  | -3.7141607 | -1.1674052 |
| H | 3.1043159  | 4.9263643  | -0.1343572 |
| H | 2.4689539  | 3.2819823  | -0.3071882 |
| H | 2.6634069  | 4.3144723  | -1.7397072 |
| H | -0.4306811 | 5.3960803  | 1.0572338  |
| H | 0.5801659  | 3.9683883  | 1.4450828  |
| H | 1.2678669  | 5.5829373  | 1.5132398  |
| H | -0.0352261 | 6.7669963  | -0.9802852 |

|   |            |            |            |
|---|------------|------------|------------|
| H | 1.2766519  | 6.3437603  | -2.1106242 |
| H | 1.6620429  | 6.9499313  | -0.4924112 |
| H | -0.2904171 | 4.6509323  | -2.1858172 |
| H | -4.5873941 | -1.9935767 | -2.2232032 |
| H | -1.0698361 | -1.5574297 | 0.6300238  |
| H | -3.4215161 | -1.8041197 | -0.2648612 |
| H | -1.8993641 | -0.8230317 | -4.1614722 |
| H | 0.2322149  | -0.0295317 | -3.1807692 |
| H | 0.7166709  | 2.3233783  | 0.3852748  |
| H | -2.8194451 | 0.2542073  | -0.5563662 |
| H | -1.7256881 | 3.5551833  | 1.1355228  |
| H | -4.0209781 | -1.3085777 | 1.7855598  |
| H | -3.9412821 | 3.5960333  | 2.8748158  |
| H | -5.6559201 | 2.0804613  | 3.8615378  |
| H | -5.6853821 | -0.3314517 | 3.2890948  |
| C | 0.5171119  | -3.0529247 | -1.3428932 |
| C | 2.3794679  | 4.3099183  | -0.6805482 |
| C | 0.5684179  | 4.9492123  | 0.9557658  |
| C | 0.9651689  | 6.3231263  | -1.0587952 |
| C | 0.9802239  | 4.8969033  | -0.5144572 |
| N | -0.0184311 | 4.1627193  | -1.3373662 |
| O | -0.7372151 | 2.3893153  | -2.5379812 |
| C | -0.2364541 | 2.8234533  | -1.5178972 |
| O | -3.8604151 | -1.7534997 | -2.8706372 |
| C | -1.3972451 | -0.8598557 | -0.1535282 |
| C | -2.6546331 | -1.3285227 | -0.8742612 |
| C | -2.7720581 | -1.3707637 | -2.2458372 |

|    |            |            |            |
|----|------------|------------|------------|
| C  | -1.7044161 | -0.8766187 | -3.0938582 |
| C  | -0.5583531 | -0.4433947 | -2.5585852 |
| C  | -0.1967881 | -0.5646257 | -1.1009672 |
| C  | 0.8624349  | -1.6567577 | -0.9697942 |
| C  | 2.0289909  | -1.1777627 | -0.4944202 |
| O  | 2.6189529  | 1.0754063  | 0.2448558  |
| C  | 1.8449599  | 0.2666453  | -0.2526292 |
| N  | 0.5628639  | 0.6100583  | -0.6768222 |
| C  | -0.0001791 | 1.8813023  | -0.3210022 |
| C  | -1.9772041 | 0.4211723  | 0.4223318  |
| C  | -1.2988891 | 1.6623523  | 0.3698278  |
| N  | -1.9567601 | 2.5697163  | 1.1042878  |
| C  | -3.9734561 | -0.2456707 | 2.0217908  |
| C  | -3.0077101 | 0.5934913  | 1.4732018  |
| C  | -3.0157511 | 1.9616393  | 1.7942538  |
| C  | -3.9493941 | 2.5324073  | 2.6486398  |
| C  | -4.9000301 | 1.6779223  | 3.1921278  |
| C  | -4.9116271 | 0.3130333  | 2.8813178  |
| Au | 3.8109209  | -2.0684877 | -0.0193172 |
| C  | 7.7726179  | -2.9940297 | 1.3180328  |
| C  | 7.4147349  | -4.2324587 | 0.9054358  |
| H  | 8.6890359  | -2.6278667 | 1.7582938  |
| H  | 7.9540599  | -5.1688217 | 0.9116568  |
| C  | 5.6644249  | -2.8584827 | 0.5212288  |
| N  | 6.1231409  | -4.1287947 | 0.4216788  |
| N  | 6.6904619  | -2.1683167 | 1.0752358  |
| C  | -6.8879221 | -4.2334147 | -0.0749722 |



|   |            |            |            |
|---|------------|------------|------------|
| F | -7.0457021 | -4.8944007 | 1.0664358  |
| F | -6.2430061 | -5.0187337 | -0.9329622 |
| F | -8.0856841 | -3.9549827 | -0.5746852 |
| S | -5.9370421 | -2.6944467 | 0.2153258  |
| O | -6.7597621 | -1.9178527 | 1.1393598  |
| O | -5.8244271 | -2.1193197 | -1.1509922 |
| O | -4.6535631 | -3.1846937 | 0.7510598  |
| C | 5.3621559  | -5.2404827 | -0.1183362 |
| H | 4.3797469  | -4.8688387 | -0.4201102 |
| H | 5.8719059  | -5.6616347 | -0.9900402 |
| H | 5.2355009  | -6.0181317 | 0.6407838  |
| C | 6.6638759  | -0.7472517 | 1.3790368  |
| H | 5.6876189  | -0.3451677 | 1.0929088  |
| H | 6.8179419  | -0.5887457 | 2.4505388  |
| H | 7.4459179  | -0.2273057 | 0.8176798  |

Zero-point correction= 0.605185 (Hartree/Particle)

Thermal correction to Energy= 0.650429

Thermal correction to Enthalpy= 0.651373

Thermal correction to Gibbs Free Energy= 0.519990

Sum of electronic and zero-point Energies= -2719.288611

Sum of electronic and thermal Energies= -2719.243367

Sum of electronic and thermal Enthalpies= -2719.242423

Sum of electronic and thermal Free Energies= -2719.373805

### A-int3

|   |            |            |            |
|---|------------|------------|------------|
| H | -0.2039609 | -3.6161369 | 0.0532592  |
| H | -0.3338059 | -3.2760279 | -1.6793958 |
| H | 1.2272241  | -3.7539999 | -0.9729008 |

|   |            |            |            |
|---|------------|------------|------------|
| H | 3.1239271  | 4.9057901  | 0.7606412  |
| H | 2.5640031  | 3.2665951  | 0.3500982  |
| H | 3.0483491  | 4.3818711  | -0.9335908 |
| H | -0.5659769 | 5.3539511  | 1.2083502  |
| H | 0.3302041  | 3.9181451  | 1.7459292  |
| H | 1.0179191  | 5.5235151  | 1.9789332  |
| H | 0.1882991  | 6.7363501  | -0.7119768 |
| H | 1.7131601  | 6.3619231  | -1.5558488 |
| H | 1.7459881  | 6.9454761  | 0.1154172  |
| H | 0.3712151  | 4.5856051  | -2.0082658 |
| H | -5.3687699 | -2.3067249 | -1.1354238 |
| H | -1.1156959 | -1.0378029 | 1.3411392  |
| H | -2.0976679 | -2.7189509 | -0.1386478 |
| H | -2.3776509 | -0.7783239 | -3.4728308 |
| H | -0.1107519 | -0.0923769 | -2.7412958 |
| H | 0.6427571  | 2.2760931  | 0.7551312  |
| H | -1.9088879 | 3.8572251  | 0.0894572  |
| H | -4.7441399 | -0.5906349 | 1.2969852  |
| H | -4.5734239 | 4.3916041  | 0.8026752  |
| H | -6.6943119 | 3.2235241  | 1.3844232  |
| H | -6.7419749 | 0.7608331  | 1.6258362  |
| C | 0.3188361  | -3.1661449 | -0.8030418 |
| C | 2.5434161  | 4.3179971  | 0.0383062  |
| C | 0.4328351  | 4.9061901  | 1.2870092  |
| C | 1.1938911  | 6.3148961  | -0.5899228 |
| C | 1.1287211  | 4.8804481  | -0.0713698 |
| N | 0.3384681  | 4.1375961  | -1.0960338 |

|    |            |            |            |
|----|------------|------------|------------|
| O  | 0.1198111  | 2.3302941  | -2.4375098 |
| C  | 0.2291211  | 2.7780451  | -1.3109598 |
| O  | -4.1740339 | -1.6919019 | -1.8773008 |
| C  | -1.5197179 | -0.6925799 | 0.3758572  |
| C  | -2.5462749 | -1.7165559 | -0.1115318 |
| C  | -3.0264029 | -1.4303209 | -1.5041698 |
| C  | -2.0545519 | -0.8842179 | -2.4400338 |
| C  | -0.8291279 | -0.5079209 | -2.0370318 |
| C  | -0.3356519 | -0.6056479 | -0.6181048 |
| C  | 0.6874521  | -1.7463689 | -0.5425218 |
| C  | 1.9208981  | -1.2870909 | -0.2518538 |
| O  | 2.6922001  | 0.9746711  | 0.2586822  |
| C  | 1.8199821  | 0.1758471  | -0.0645348 |
| N  | 0.5100891  | 0.5357041  | -0.3008698 |
| C  | 0.0500251  | 1.8768891  | -0.0805998 |
| C  | -2.1231919 | 0.6827491  | 0.5142822  |
| C  | -1.3988709 | 1.8178561  | 0.2702622  |
| N  | -2.1906329 | 2.9344951  | 0.3894312  |
| C  | -4.6757529 | 0.4856461  | 1.1610592  |
| C  | -3.4691359 | 1.1173071  | 0.8117272  |
| C  | -3.4704579 | 2.5321621  | 0.7016122  |
| C  | -4.6102399 | 3.3083821  | 0.8996282  |
| C  | -5.7838119 | 2.6507211  | 1.2248082  |
| C  | -5.8104369 | 1.2539561  | 1.3584372  |
| Au | 3.7570821  | -2.1550479 | 0.0057442  |
| C  | 7.9168031  | -2.7572549 | 0.7834882  |
| C  | 7.5946291  | -4.0465779 | 0.5263942  |

|   |            |            |            |
|---|------------|------------|------------|
| H | 8.8589451  | -2.2985739 | 1.0476472  |
| H | 8.1969291  | -4.9437429 | 0.5200372  |
| C | 5.7096661  | -2.8214149 | 0.3138662  |
| N | 6.2411151  | -4.0647519 | 0.2415442  |
| N | 6.7527091  | -2.0236269 | 0.6488382  |
| C | -5.1277149 | -5.0326869 | -0.1013898 |
| F | -4.8613969 | -5.8229729 | 0.9227632  |
| F | -3.9856209 | -4.6054549 | -0.6336968 |
| F | -5.8095219 | -5.6984169 | -1.0121568 |
| S | -6.0885619 | -3.5843789 | 0.4924882  |
| O | -7.3870839 | -4.0700809 | 0.8843332  |
| O | -6.2280529 | -2.7807419 | -0.8373098 |
| O | -5.2062009 | -2.9122339 | 1.4301692  |
| C | 5.4914251  | -5.2612629 | -0.0913908 |
| H | 4.4505891  | -4.9753959 | -0.2615878 |
| H | 5.8926371  | -5.7210669 | -0.9996408 |
| H | 5.5381471  | -5.9805369 | 0.7318492  |
| C | 6.6680471  | -0.5843449 | 0.8422832  |
| H | 7.3208631  | -0.0712199 | 0.1299262  |
| H | 5.6348131  | -0.2633939 | 0.6778932  |
| H | 6.9666721  | -0.3250849 | 1.8623372  |
| H | -3.4003969 | -1.8003599 | 0.5637612  |

Zero-point correction= 0.610500 (Hartree/Particle)

Thermal correction to Energy= 0.655861

Thermal correction to Enthalpy= 0.656805

Thermal correction to Gibbs Free Energy= 0.525436

Sum of electronic and zero-point Energies= -2719.376095

Sum of electronic and thermal Energies= -2719.330734

Sum of electronic and thermal Enthalpies= -2719.329790

Sum of electronic and thermal Free Energies= -2719.461158

**A-int4**

|   |            |            |            |
|---|------------|------------|------------|
| H | -1.0340552 | -0.3570824 | 3.4762045  |
| H | -1.1620492 | 1.2917606  | 2.8481545  |
| H | -2.5453972 | 0.1779566  | 2.7257075  |
| H | 3.5948118  | 3.1752436  | -4.6060375 |
| H | 3.7651708  | 1.4059756  | -4.6245345 |
| H | 2.1747098  | 2.1411256  | -4.3122545 |
| H | 5.3139308  | 2.3959206  | -1.3654745 |
| H | 5.5901848  | 1.5375616  | -2.9041255 |
| H | 5.4398008  | 3.3056206  | -2.8805045 |
| H | 3.0910208  | 3.4589106  | -0.8948745 |
| H | 1.7680858  | 3.3547046  | -2.0861895 |
| H | 3.1817238  | 4.3867216  | -2.4086245 |
| H | 3.7963698  | 0.5742486  | -1.3769715 |
| H | 0.9947048  | -1.6654324 | 2.2608245  |
| H | 1.0640388  | 0.2952736  | 3.6766535  |
| H | 1.8754148  | 3.1511636  | 1.2631865  |
| H | 0.2229688  | 1.8804936  | -0.0708435 |
| H | 1.3974218  | -1.5271044 | -1.9905315 |
| H | 4.1665038  | -1.9484084 | -1.7235545 |
| H | 3.8930598  | -2.0190484 | 3.6564745  |
| H | 6.5072058  | -2.9352194 | -0.5175085 |
| H | 7.4204338  | -3.5197574 | 1.7205395  |
| H | 6.1167948  | -3.0645234 | 3.7705275  |

|   |            |            |            |
|---|------------|------------|------------|
| C | -1.4547602 | 0.2487916  | 2.6610355  |
| C | 3.2493128  | 2.2441106  | -4.1403395 |
| C | 5.0636678  | 2.3782476  | -2.4345805 |
| C | 2.8526648  | 3.4382876  | -1.9662335 |
| C | 3.5595328  | 2.2693316  | -2.6475705 |
| N | 3.1452028  | 0.9922016  | -2.0307735 |
| O | 0.9190028  | 1.0849686  | -2.5413965 |
| C | 1.8640658  | 0.5462766  | -1.9906245 |
| O | 3.3093548  | 2.0698696  | 3.1552935  |
| C | 1.5018428  | -0.7793084 | 1.8429115  |
| C | 1.9216968  | 0.1242706  | 3.0098395  |
| C | 2.4100648  | 1.4875316  | 2.5783515  |
| C | 1.6689538  | 2.1010076  | 1.4635585  |
| C | 0.7796238  | 1.4083206  | 0.7419885  |
| C | 0.4818358  | -0.0609354 | 0.9147225  |
| C | -0.9778782 | -0.2291444 | 1.3355035  |
| C | -1.7088032 | -0.8141424 | 0.3607765  |
| O | -1.0282112 | -1.7370824 | -1.8008225 |
| C | -0.7871412 | -1.1441474 | -0.7630385 |
| N | 0.4593128  | -0.6803344 | -0.3982585 |
| C | 1.6351568  | -0.7784174 | -1.2154335 |
| C | 2.6871308  | -1.2502394 | 1.0431875  |
| C | 2.7357188  | -1.2353384 | -0.3232695 |
| N | 3.9513768  | -1.7247444 | -0.7636715 |
| C | 4.4548248  | -2.1929764 | 2.7413465  |
| C | 3.9226758  | -1.8413924 | 1.4920805  |
| C | 4.6857318  | -2.1304654 | 0.3338185  |

|    |            |            |            |
|----|------------|------------|------------|
| C  | 5.9431278  | -2.7261384 | 0.3891505  |
| C  | 6.4427328  | -3.0508004 | 1.6399555  |
| C  | 5.7026308  | -2.7898884 | 2.8034225  |
| Au | -3.6723842 | -1.3957804 | 0.1349105  |
| C  | -7.2855562 | -2.9772924 | -1.4854265 |
| C  | -7.8315252 | -2.2909054 | -0.4538045 |
| H  | -7.7395982 | -3.5723754 | -2.2647155 |
| H  | -8.8605472 | -2.1568834 | -0.1527135 |
| C  | -5.5990242 | -2.0159464 | -0.3396485 |
| N  | -6.7833912 | -1.7129114 | 0.2370405  |
| N  | -5.9182472 | -2.7959824 | -1.4002335 |
| C  | -4.4493312 | 3.8935776  | 0.8946155  |
| F  | -3.5213282 | 4.2463906  | 1.7616825  |
| F  | -5.6386922 | 4.2643406  | 1.3385885  |
| F  | -4.2144172 | 4.4537136  | -0.2740185 |
| S  | -4.4849522 | 2.0625546  | 0.7233835  |
| O  | -3.0032552 | 1.9385486  | 0.1801895  |
| O  | -5.4681712 | 1.7444476  | -0.2905925 |
| O  | -4.6064752 | 1.5068506  | 2.0588345  |
| C  | -6.9477362 | -0.8325164 | 1.3817295  |
| H  | -5.9677592 | -0.6383424 | 1.8234995  |
| H  | -7.3754522 | 0.1230186  | 1.0638315  |
| H  | -7.5988852 | -1.3069864 | 2.1215725  |
| C  | -4.9563702 | -3.3745904 | -2.3250995 |
| H  | -5.2706022 | -3.1762694 | -3.3536555 |
| H  | -3.9772852 | -2.9155144 | -2.1577265 |
| H  | -4.8787462 | -4.4550094 | -2.1694195 |

|   |            |            |           |
|---|------------|------------|-----------|
| H | 2.7072028  | -0.3329164 | 3.6180985 |
| H | -2.6807762 | 0.9929566  | 0.2019065 |

Zero-point correction= 0.608959 (Hartree/Particle)

Thermal correction to Energy= 0.654909

Thermal correction to Enthalpy= 0.655853

Thermal correction to Gibbs Free Energy= 0.524180

Sum of electronic and zero-point Energies= -2719.375873

Sum of electronic and thermal Energies= -2719.329923

Sum of electronic and thermal Enthalpies= -2719.328979

Sum of electronic and thermal Free Energies= -2719.460653

#### **A-ts4**

|   |            |            |            |
|---|------------|------------|------------|
| H | -1.9320258 | -2.8934842 | 2.2085299  |
| H | -1.6802638 | -1.5444432 | 3.3226829  |
| H | -3.2893768 | -1.8357462 | 2.6176919  |
| H | 2.5082302  | 5.8694958  | 0.0274929  |
| H | 1.9835012  | 5.0432148  | -1.4535041 |
| H | 0.9758452  | 4.9639248  | 0.0115749  |
| H | 4.8097612  | 2.9746488  | -0.1139301 |
| H | 4.2087192  | 3.8557228  | -1.5439461 |
| H | 4.6700952  | 4.7404908  | -0.0756461 |
| H | 3.3694862  | 2.7224068  | 1.9076749  |
| H | 1.7674302  | 3.5149968  | 1.9929179  |
| H | 3.2538882  | 4.4884078  | 2.0537209  |
| H | 2.8285712  | 1.8105178  | -0.8304081 |
| H | -0.1884208 | -2.4896202 | 0.0203429  |
| H | 0.2549572  | -3.1059522 | 2.2579649  |
| H | 1.3636072  | 0.4651378  | 3.7424229  |



|   |            |            |            |
|---|------------|------------|------------|
| H | -0.3014898 | 1.2826368  | 2.0980249  |
| H | -0.0941308 | 1.2125368  | -1.9354381 |
| H | 2.5124902  | -0.8627852 | 0.3022379  |
| H | 2.1863032  | 0.3745388  | -3.0749721 |
| H | 2.5305672  | -4.1457412 | -0.1554811 |
| H | 3.8236102  | -1.5699672 | -4.2566681 |
| H | 4.6366732  | -3.8988922 | -3.8952741 |
| H | 3.9707412  | -5.1627882 | -1.8850851 |
| C | -2.2139088 | -1.8500562 | 2.4127449  |
| C | 2.0033572  | 4.9755378  | -0.3584981 |
| C | 4.2017462  | 3.8217938  | -0.4466751 |
| C | 2.7877972  | 3.6024628  | 1.6044289  |
| C | 2.7760192  | 3.7368968  | 0.0839019  |
| N | 2.1651392  | 2.5174218  | -0.5126721 |
| O | 0.0444942  | 2.8439448  | 0.2829369  |
| C | 0.8756912  | 2.1791618  | -0.3100961 |
| O | 2.2111072  | -1.9906972 | 3.8082849  |
| C | 0.4432472  | -1.7679002 | 0.5636909  |
| C | 1.0161632  | -2.4549482 | 1.8071999  |
| C | 1.4998382  | -1.5494122 | 2.9271769  |
| C | 0.9936912  | -0.1702252 | 2.9405329  |
| C | 0.0976772  | 0.2694308  | 2.0485029  |
| C | -0.4667548 | -0.5623822 | 0.9266859  |
| C | -1.9099938 | -0.9608522 | 1.2591249  |
| C | -2.7910908 | -0.4072102 | 0.4032959  |
| O | -2.4123888 | 0.9899158  | -1.5743711 |
| C | -2.0224728 | 0.3753078  | -0.5940331 |

|    |             |            |            |
|----|-------------|------------|------------|
| N  | -0.6870218  | 0.2645898  | -0.2451801 |
| C  | 0.3704062   | 0.8702878  | -0.9940861 |
| C  | 1.5406482   | -1.3401442 | -0.4146841 |
| C  | 1.3360352   | -0.2208482 | -1.2746731 |
| N  | 2.0560812   | -0.3558702 | -2.3861241 |
| C  | 2.7985952   | -3.5783362 | -1.0431401 |
| C  | 2.3327822   | -2.2805272 | -1.2361311 |
| C  | 2.7033952   | -1.5982332 | -2.4048351 |
| C  | 3.5383382   | -2.1345412 | -3.3727851 |
| C  | 3.9861202   | -3.4316662 | -3.1607251 |
| C  | 3.6108642   | -4.1457072 | -2.0178041 |
| Au | -4.8261528  | -0.4421382 | 0.1861269  |
| C  | -8.7732398  | 0.3197988  | -1.2604231 |
| C  | -9.1141088  | -0.5173782 | -0.2528391 |
| H  | -9.3790078  | 0.8407458  | -1.9880591 |
| H  | -10.0772738 | -0.8775412 | 0.0792669  |
| C  | -6.8652268  | -0.3123502 | -0.2332181 |
| N  | -7.9335478  | -0.8929122 | 0.3628709  |
| N  | -7.3957348  | 0.4327048  | -1.2332781 |
| C  | 5.9579762   | -1.2067342 | 0.3008609  |
| F  | 6.2870142   | -1.7034012 | 1.4795209  |
| F  | 7.0341772   | -0.6955192 | -0.2778171 |
| F  | 5.4757492   | -2.1775762 | -0.4647631 |
| S  | 4.6991052   | 0.1116138  | 0.5012299  |
| O  | 3.5446202   | -0.6325512 | 1.1385099  |
| O  | 4.3731002   | 0.5127498  | -0.8773771 |
| O  | 5.3065632   | 1.1007688  | 1.3734739  |

|   |            |            |            |
|---|------------|------------|------------|
| C | -7.8529088 | -1.7893002 | 1.5003329  |
| H | -6.7992878 | -1.9146152 | 1.7614059  |
| H | -8.3889878 | -1.3678992 | 2.3561299  |
| H | -8.2808058 | -2.7640602 | 1.2470829  |
| C | -6.6261508 | 1.2528788  | -2.1565401 |
| H | -6.8992568 | 2.3059138  | -2.0410201 |
| H | -5.5606888 | 1.1333628  | -1.9374471 |
| H | -6.8188958 | 0.9370468  | -3.1860401 |
| H | 1.8585952  | -3.1100602 | 1.5570909  |

Zero-point correction= 0.603519 (Hartree/Particle)

Thermal correction to Energy= 0.649226

Thermal correction to Enthalpy= 0.650170

Thermal correction to Gibbs Free Energy= 0.518438

Sum of electronic and zero-point Energies= -2719.366826

Sum of electronic and thermal Energies= -2719.321119

Sum of electronic and thermal Enthalpies= -2719.320175

Sum of electronic and thermal Free Energies= -2719.451908

## A-2

|   |            |            |            |
|---|------------|------------|------------|
| H | -0.0821954 | 3.2636664  | -3.1645095 |
| H | 1.3667056  | 2.6236514  | -3.9801565 |
| H | -0.2505734 | 2.4387964  | -4.7104375 |
| H | 5.3276846  | -3.9654206 | 0.9416635  |
| H | 3.9682036  | -3.4742046 | 1.9761535  |
| H | 3.6554436  | -4.1958366 | 0.3770485  |
| H | 5.2546966  | -0.2019246 | 0.6894985  |
| H | 4.8900746  | -1.1415606 | 2.1584895  |
| H | 6.2666936  | -1.5901186 | 1.1332485  |

|   |            |            |            |
|---|------------|------------|------------|
| H | 4.9032616  | -1.2229516 | -1.5763625 |
| H | 4.2000286  | -2.8520916 | -1.7394285 |
| H | 5.8674626  | -2.6502656 | -1.1450915 |
| H | 2.8955006  | -0.6476466 | 0.7772035  |
| H | -0.2108274 | 2.3393214  | -0.8751095 |
| H | 1.6971466  | 3.5613544  | -1.6223555 |
| H | 4.4352766  | 0.9896204  | -2.0298805 |
| H | 2.5076116  | -0.3015506 | -2.8880345 |
| H | -0.1687844 | -1.9139966 | -0.0849005 |
| H | 0.3980486  | -1.3563526 | 2.6014905  |
| H | 0.3577356  | 3.9624494  | 1.7022305  |
| H | 0.0704676  | 0.1583024  | 4.9519945  |
| H | -0.1199094 | 2.5150704  | 5.7190765  |
| H | 0.0116536  | 4.3820394  | 4.1058875  |
| C | 0.3066296  | 2.4323554  | -3.7697515 |
| C | 4.3197986  | -3.5324456 | 0.9387855  |
| C | 5.2382266  | -1.2126816 | 1.1199975  |
| C | 4.8568726  | -2.2240696 | -1.1306765 |
| C | 4.3495276  | -2.1445306 | 0.3067105  |
| N | 2.9946556  | -1.5601016 | 0.3461135  |
| O | 1.9056476  | -3.0493466 | -1.0095285 |
| C | 1.9239866  | -2.0319776 | -0.3348805 |
| O | 4.1818046  | 2.8262254  | -0.1965655 |
| C | 0.7500616  | 1.8461614  | -0.6911795 |
| C | 1.8434936  | 2.9250364  | -0.7364405 |
| C | 3.2415766  | 2.3695904  | -0.8203495 |
| C | 3.4113076  | 1.2471574  | -1.7613095 |

|    |            |            |            |
|----|------------|------------|------------|
| C  | 2.3660906  | 0.5483344  | -2.2157125 |
| C  | 0.9301666  | 0.7860124  | -1.8218345 |
| C  | 0.1074036  | 1.1527294  | -3.0485275 |
| C  | -0.8089574 | 0.2069124  | -3.2831875 |
| O  | -1.4696264 | -1.7970086 | -2.0721535 |
| C  | -0.7303924 | -0.8385176 | -2.2540365 |
| N  | 0.3498556  | -0.5089206 | -1.4636825 |
| C  | 0.6398636  | -1.1782286 | -0.2166215 |
| C  | 0.6546376  | 1.1971984  | 0.6567755  |
| C  | 0.6129076  | -0.1531706 | 0.8569495  |
| N  | 0.4450106  | -0.4345596 | 2.1974995  |
| C  | 0.3225196  | 3.1285124  | 2.3989355  |
| C  | 0.4533296  | 1.8084414  | 1.9449995  |
| C  | 0.3404376  | 0.7555804  | 2.8865845  |
| C  | 0.1458096  | 0.9838764  | 4.2471165  |
| C  | 0.0378226  | 2.3003504  | 4.6647385  |
| C  | 0.1171176  | 3.3607374  | 3.7482195  |
| Au | -3.3486414 | -0.2917536 | -0.0915795 |
| C  | -5.1668334 | -4.0447336 | 0.4927025  |
| C  | -6.2590394 | -3.2442416 | 0.5213615  |
| H  | -5.0683004 | -5.1171796 | 0.5772965  |
| H  | -7.3084254 | -3.4739876 | 0.6354795  |
| C  | -4.4598384 | -1.9320856 | 0.2213785  |
| N  | -5.8066484 | -1.9497126 | 0.3533835  |
| N  | -4.0728054 | -3.2230326 | 0.3056765  |
| C  | -2.6306734 | 4.0277794  | 0.0239525  |
| F  | -1.3397344 | 4.3178654  | -0.1530145 |

|   |            |            |            |
|---|------------|------------|------------|
| F | -2.8238894 | 3.7006764  | 1.2904625  |
| F | -3.3471214 | 5.1029714  | -0.2636575 |
| S | -3.1204904 | 2.6501724  | -1.0915685 |
| O | -2.6262034 | 3.0441044  | -2.4039965 |
| O | -4.5548884 | 2.4774824  | -0.8905345 |
| O | -2.3011534 | 1.5214964  | -0.4798045 |
| C | -6.6702234 | -0.7784986 | 0.3237935  |
| H | -7.0851894 | -0.5898276 | 1.3182635  |
| H | -6.0859384 | 0.0900114  | 0.0065775  |
| H | -7.4840694 | -0.9415146 | -0.3880175 |
| C | -2.6909374 | -3.6775436 | 0.2170525  |
| H | -2.1715914 | -3.4770566 | 1.1605425  |
| H | -2.6883534 | -4.7532936 | 0.0281495  |
| H | -2.1847074 | -3.1589616 | -0.6048505 |
| H | 1.7878836  | 3.5779744  | 0.1401805  |
| H | -1.5711774 | 0.2128824  | -4.0539375 |

Zero-point correction= 0.611092 (Hartree/Particle)

Thermal correction to Energy= 0.656398

Thermal correction to Enthalpy= 0.657342

Thermal correction to Gibbs Free Energy= 0.529567

Sum of electronic and zero-point Energies= -2719.410547

Sum of electronic and thermal Energies= -2719.365241

Sum of electronic and thermal Enthalpies= -2719.364297

Sum of electronic and thermal Free Energies= -2719.492072

#### **A-ts5**

|   |            |            |           |
|---|------------|------------|-----------|
| H | -1.8077235 | -2.8242469 | 2.2186816 |
| H | -1.9129615 | -1.4612779 | 3.3281476 |

|   |            |            |            |
|---|------------|------------|------------|
| H | -3.3572915 | -1.9683339 | 2.4233496  |
| H | 2.6785165  | 5.8529261  | 0.1634606  |
| H | 2.0411575  | 5.0671571  | -1.2945944 |
| H | 1.1266755  | 4.9827971  | 0.2296656  |
| H | 4.8974575  | 2.9090541  | -0.1715794 |
| H | 4.2447525  | 3.8661311  | -1.5333414 |
| H | 4.8132535  | 4.6761051  | -0.0591844 |
| H | 3.5875105  | 2.6520811  | 1.9241606  |
| H | 1.9944465  | 3.4484791  | 2.1194686  |
| H | 3.4876395  | 4.4123681  | 2.1259726  |
| H | 2.8914815  | 1.7828361  | -0.7256454 |
| H | -0.2302045 | -2.4009989 | -0.0304404 |
| H | 0.8224095  | -3.2785659 | 3.0196056  |
| H | 1.0078175  | 0.2669981  | 4.0361286  |
| H | -0.2612605 | 1.3276531  | 2.1485336  |
| H | -0.0682765 | 1.3411831  | -1.8595344 |
| H | 2.3450585  | -0.8175709 | 0.3832006  |
| H | 1.9296615  | 0.2620771  | -3.1638914 |
| H | 2.6557255  | -4.0183079 | 0.0352466  |
| H | 3.4721045  | -1.7427679 | -4.3547754 |
| H | 4.3594845  | -4.0340579 | -3.9151594 |
| H | 3.9348125  | -5.1483569 | -1.7586454 |
| C | -2.2720485 | -1.8384179 | 2.3608956  |
| C | 2.1291095  | 4.9778751  | -0.2044194 |
| C | 4.2989895  | 3.7861861  | -0.4398584 |
| C | 2.9931715  | 3.5410701  | 1.6783776  |
| C | 2.9021835  | 3.7165181  | 0.1652986  |

|    |            |            |            |
|----|------------|------------|------------|
| N  | 2.2437705  | 2.5206901  | -0.4289774 |
| O  | 0.1394985  | 2.8771741  | 0.4119496  |
| C  | 0.9544605  | 2.2176531  | -0.2102764 |
| O  | 1.0666965  | -2.5150319 | 4.0126536  |
| C  | 0.4018465  | -1.7369999 | 0.5807586  |
| C  | 0.9410975  | -2.4387509 | 1.8138566  |
| C  | 0.9603595  | -1.6946779 | 3.0347106  |
| C  | 0.7318365  | -0.2760689 | 3.1366926  |
| C  | 0.0418455  | 0.2816941  | 2.1266236  |
| C  | -0.4889315 | -0.5115569 | 0.9563036  |
| C  | -1.9430345 | -0.9155519 | 1.2424936  |
| C  | -2.7982835 | -0.3538159 | 0.3647556  |
| O  | -2.3602455 | 1.0665561  | -1.5833394 |
| C  | -2.0039835 | 0.4455481  | -0.5947664 |
| N  | -0.6758635 | 0.3428371  | -0.2014414 |
| C  | 0.3939235  | 0.9475351  | -0.9375444 |
| C  | 1.5768535  | -1.2635329 | -0.3067764 |
| C  | 1.3065225  | -0.1710219 | -1.2518884 |
| N  | 1.9065355  | -0.3981109 | -2.3939684 |
| C  | 2.8228235  | -3.5182879 | -0.9151284 |
| C  | 2.3245105  | -2.2466999 | -1.1520394 |
| C  | 2.5654235  | -1.6512859 | -2.3918514 |
| C  | 3.2920995  | -2.2437839 | -3.4073564 |
| C  | 3.7823715  | -3.5207509 | -3.1508824 |
| C  | 3.5424435  | -4.1491599 | -1.9284104 |
| Au | -4.8267905 | -0.3978829 | 0.0904316  |
| C  | -8.7533605 | 0.3730741  | -1.4067524 |



|   |             |            |            |
|---|-------------|------------|------------|
| C | -9.1061255  | -0.4716219 | -0.4096004 |
| H | -9.3505025  | 0.9001941  | -2.1370604 |
| H | -10.0732685 | -0.8334579 | -0.0911664 |
| C | -6.8577615  | -0.2684119 | -0.3626904 |
| N | -7.9330315  | -0.8527969 | 0.2166856  |
| N | -7.3761475  | 0.4847981  | -1.3629194 |
| C | 6.1391195   | -1.1320969 | -0.0576484 |
| F | 6.7888105   | -1.6386559 | 0.9805216  |
| F | 7.0032395   | -0.4944919 | -0.8371534 |
| F | 5.6023725   | -2.1328559 | -0.7543804 |
| S | 4.8277015   | 0.0159121  | 0.5092246  |
| O | 3.9650165   | -0.8295749 | 1.3604136  |
| O | 4.1745805   | 0.3987641  | -0.7718274 |
| O | 5.5433365   | 1.0924211  | 1.1876246  |
| C | -7.8666195  | -1.7566209 | 1.3494456  |
| H | -6.8164075  | -1.8849139 | 1.6225616  |
| H | -8.4123535  | -1.3398399 | 2.2013566  |
| H | -8.2925145  | -2.7291919 | 1.0849116  |
| C | -6.5956165  | 1.3121561  | -2.2701234 |
| H | -5.5334645  | 1.1957951  | -2.0340144 |
| H | -6.7704515  | 1.0005881  | -3.3041314 |
| H | -6.8747945  | 2.3635451  | -2.1540924 |
| H | 1.9668065   | -2.8060229 | 1.6751056  |

Zero-point correction= 0.604111 (Hartree/Particle)

Thermal correction to Energy= 0.649175

Thermal correction to Enthalpy= 0.650119

Thermal correction to Gibbs Free Energy= 0.521254

Sum of electronic and zero-point Energies= -2719.265043

Sum of electronic and thermal Energies= -2719.219979

Sum of electronic and thermal Enthalpies= -2719.219035

Sum of electronic and thermal Free Energies= -2719.347900

**A-int5**

|   |            |            |            |
|---|------------|------------|------------|
| H | -2.0451400 | -2.9008335 | 2.2094878  |
| H | -1.7299680 | -1.5536955 | 3.3107918  |
| H | -3.3516940 | -1.7808175 | 2.6120448  |
| H | 2.4606390  | 5.8614375  | 0.0617878  |
| H | 1.8654610  | 5.0231605  | -1.3848942 |
| H | 0.9371160  | 4.9430995  | 0.1309178  |
| H | 4.7794990  | 2.9892205  | -0.1755932 |
| H | 4.1209270  | 3.9069595  | -1.5619802 |
| H | 4.6364710  | 4.7537005  | -0.0888242 |
| H | 3.4490700  | 2.7312615  | 1.9051108  |
| H | 1.8193610  | 3.4617925  | 2.0552658  |
| H | 3.2691570  | 4.4890795  | 2.0737418  |
| H | 2.8306270  | 1.7835045  | -0.7323122 |
| H | -0.1754690 | -2.4800515 | -0.0565742 |
| H | 0.0979680  | -3.1276735 | 2.2480288  |
| H | 1.3694280  | 0.3837515  | 3.7400248  |
| H | -0.2803310 | 1.2503565  | 2.1025598  |
| H | -0.0768360 | 1.2030365  | -1.9242832 |
| H | 2.3649890  | -0.8430425 | 0.4224188  |
| H | 1.9444610  | 0.1646115  | -3.1608672 |
| H | 2.8936440  | -3.9941565 | 0.1428228  |
| H | 3.5663000  | -1.7873295 | -4.3008662 |

|   |            |            |            |
|---|------------|------------|------------|
| H | 4.5712500  | -4.0209415 | -3.8113782 |
| H | 4.2134160  | -5.0967155 | -1.6221842 |
| C | -2.2783750 | -1.8440735 | 2.4050028  |
| C | 1.9439740  | 4.9610105  | -0.2921012 |
| C | 4.1580990  | 3.8428345  | -0.4667382 |
| C | 2.8222070  | 3.5894855  | 1.6320658  |
| C | 2.7537330  | 3.7347675  | 0.1147578  |
| N | 2.1509840  | 2.5043545  | -0.4675612 |
| O | 0.0100500  | 2.8063175  | 0.3011508  |
| C | 0.8679360  | 2.1611855  | -0.2755232 |
| O | 2.1002420  | -2.1094325 | 3.8336518  |
| C | 0.4202370  | -1.7981215 | 0.5702248  |
| C | 0.9114560  | -2.5292905 | 1.8173558  |
| C | 1.4261210  | -1.6414915 | 2.9389108  |
| C | 0.9770720  | -0.2401375 | 2.9399768  |
| C | 0.0891450  | 0.2261455  | 2.0522098  |
| C | -0.4896060 | -0.5932655 | 0.9274748  |
| C | -1.9414650 | -0.9790525 | 1.2415408  |
| C | -2.8070160 | -0.4315195 | 0.3652938  |
| O | -2.3888880 | 0.9352615  | -1.6256762 |
| C | -2.0217440 | 0.3335895  | -0.6294902 |
| N | -0.6899680 | 0.2273055  | -0.2535412 |
| C | 0.3739100  | 0.8499455  | -0.9807412 |
| C | 1.6199330  | -1.3164995 | -0.2744952 |
| C | 1.3272400  | -0.2470735 | -1.2450262 |
| N | 1.9378820  | -0.4813845 | -2.3787272 |
| C | 3.0009270  | -3.5163015 | -0.8264642 |

|    |             |            |            |
|----|-------------|------------|------------|
| C  | 2.4175970   | -2.2874275 | -1.0963352 |
| C  | 2.6398210   | -1.7086055 | -2.3479352 |
| C  | 3.4045460   | -2.2812055 | -3.3464202 |
| C  | 3.9622610   | -3.5235475 | -3.0615412 |
| C  | 3.7573100   | -4.1309545 | -1.8229822 |
| Au | -4.8417950  | -0.4402315 | 0.1354798  |
| C  | -8.7755730  | 0.3938455  | -1.3064732 |
| C  | -9.1297130  | -0.4373765 | -0.2985462 |
| H  | -9.3731800  | 0.9272915  | -2.0317912 |
| H  | -10.0987610 | -0.7788255 | 0.0361928  |
| C  | -6.8775240  | -0.2762565 | -0.2853332 |
| N  | -7.9550270  | -0.8365145 | 0.3133728  |
| N  | -7.3960670  | 0.4797125  | -1.2833682 |
| C  | 6.1787120   | -0.9811085 | 0.0124758  |
| F  | 6.8547030   | -1.4175825 | 1.0642888  |
| F  | 7.0022420   | -0.3071695 | -0.7807822 |
| F  | 5.7109790   | -2.0312045 | -0.6615342 |
| S  | 4.7923630   | 0.0915515  | 0.5461958  |
| O  | 3.9673590   | -0.7985175 | 1.3889078  |
| O  | 4.1381680   | 0.4242485  | -0.7492502 |
| O  | 5.4307930   | 1.2157365  | 1.2236448  |
| C  | -7.8894210  | -1.7342515 | 1.4509048  |
| H  | -6.8379080  | -1.8826215 | 1.7082488  |
| H  | -8.4128620  | -1.3009115 | 2.3085228  |
| H  | -8.3395680  | -2.6993855 | 1.1995478  |
| C  | -6.6138550  | 1.2872635  | -2.2070702 |
| H  | -6.8635740  | 2.3454145  | -2.0856462 |

|   |            |            |            |
|---|------------|------------|------------|
| H | -5.5501730 | 1.1440555  | -1.9938622 |
| H | -6.8186870 | 0.9802005  | -3.2368712 |
| H | 1.7124010  | -3.2398955 | 1.5891848  |

Zero-point correction= 0.610004 (Hartree/Particle)

Thermal correction to Energy= 0.655141

Thermal correction to Enthalpy= 0.656085

Thermal correction to Gibbs Free Energy= 0.527039

Sum of electronic and zero-point Energies= -2719.362601

Sum of electronic and thermal Energies= -2719.317465

Sum of electronic and thermal Enthalpies= -2719.316521

Sum of electronic and thermal Free Energies= -2719.445567

#### **A-ts6**

|   |            |            |            |
|---|------------|------------|------------|
| H | -1.9320258 | -2.8934842 | 2.2085299  |
| H | -1.6802638 | -1.5444432 | 3.3226829  |
| H | -3.2893768 | -1.8357462 | 2.6176919  |
| H | 2.5082302  | 5.8694958  | 0.0274929  |
| H | 1.9835012  | 5.0432148  | -1.4535041 |
| H | 0.9758452  | 4.9639248  | 0.0115749  |
| H | 4.8097612  | 2.9746488  | -0.1139301 |
| H | 4.2087192  | 3.8557228  | -1.5439461 |
| H | 4.6700952  | 4.7404908  | -0.0756461 |
| H | 3.3694862  | 2.7224068  | 1.9076749  |
| H | 1.7674302  | 3.5149968  | 1.9929179  |
| H | 3.2538882  | 4.4884078  | 2.0537209  |
| H | 2.8285712  | 1.8105178  | -0.8304081 |
| H | -0.1884208 | -2.4896202 | 0.0203429  |
| H | 0.2549572  | -3.1059522 | 2.2579649  |

|   |            |            |            |
|---|------------|------------|------------|
| H | 1.3636072  | 0.4651378  | 3.7424229  |
| H | -0.3014898 | 1.2826368  | 2.0980249  |
| H | -0.0941308 | 1.2125368  | -1.9354381 |
| H | 2.5124902  | -0.8627852 | 0.3022379  |
| H | 2.1863032  | 0.3745388  | -3.0749721 |
| H | 2.5305672  | -4.1457412 | -0.1554811 |
| H | 3.8236102  | -1.5699672 | -4.2566681 |
| H | 4.6366732  | -3.8988922 | -3.8952741 |
| H | 3.9707412  | -5.1627882 | -1.8850851 |
| C | -2.2139088 | -1.8500562 | 2.4127449  |
| C | 2.0033572  | 4.9755378  | -0.3584981 |
| C | 4.2017462  | 3.8217938  | -0.4466751 |
| C | 2.7877972  | 3.6024628  | 1.6044289  |
| C | 2.7760192  | 3.7368968  | 0.0839019  |
| N | 2.1651392  | 2.5174218  | -0.5126721 |
| O | 0.0444942  | 2.8439448  | 0.2829369  |
| C | 0.8756912  | 2.1791618  | -0.3100961 |
| O | 2.2111072  | -1.9906972 | 3.8082849  |
| C | 0.4432472  | -1.7679002 | 0.5636909  |
| C | 1.0161632  | -2.4549482 | 1.8071999  |
| C | 1.4998382  | -1.5494122 | 2.9271769  |
| C | 0.9936912  | -0.1702252 | 2.9405329  |
| C | 0.0976772  | 0.2694308  | 2.0485029  |
| C | -0.4667548 | -0.5623822 | 0.9266859  |
| C | -1.9099938 | -0.9608522 | 1.2591249  |
| C | -2.7910908 | -0.4072102 | 0.4032959  |
| O | -2.4123888 | 0.9899158  | -1.5743711 |

|    |             |            |            |
|----|-------------|------------|------------|
| C  | -2.0224728  | 0.3753078  | -0.5940331 |
| N  | -0.6870218  | 0.2645898  | -0.2451801 |
| C  | 0.3704062   | 0.8702878  | -0.9940861 |
| C  | 1.5406482   | -1.3401442 | -0.4146841 |
| C  | 1.3360352   | -0.2208482 | -1.2746731 |
| N  | 2.0560812   | -0.3558702 | -2.3861241 |
| C  | 2.7985952   | -3.5783362 | -1.0431401 |
| C  | 2.3327822   | -2.2805272 | -1.2361311 |
| C  | 2.7033952   | -1.5982332 | -2.4048351 |
| C  | 3.5383382   | -2.1345412 | -3.3727851 |
| C  | 3.9861202   | -3.4316662 | -3.1607251 |
| C  | 3.6108642   | -4.1457072 | -2.0178041 |
| Au | -4.8261528  | -0.4421382 | 0.1861269  |
| C  | -8.7732398  | 0.3197988  | -1.2604231 |
| C  | -9.1141088  | -0.5173782 | -0.2528391 |
| H  | -9.3790078  | 0.8407458  | -1.9880591 |
| H  | -10.0772738 | -0.8775412 | 0.0792669  |
| C  | -6.8652268  | -0.3123502 | -0.2332181 |
| N  | -7.9335478  | -0.8929122 | 0.3628709  |
| N  | -7.3957348  | 0.4327048  | -1.2332781 |
| C  | 5.9579762   | -1.2067342 | 0.3008609  |
| F  | 6.2870142   | -1.7034012 | 1.4795209  |
| F  | 7.0341772   | -0.6955192 | -0.2778171 |
| F  | 5.4757492   | -2.1775762 | -0.4647631 |
| S  | 4.6991052   | 0.1116138  | 0.5012299  |
| O  | 3.5446202   | -0.6325512 | 1.1385099  |
| O  | 4.3731002   | 0.5127498  | -0.8773771 |

|   |            |            |            |
|---|------------|------------|------------|
| O | 5.3065632  | 1.1007688  | 1.3734739  |
| C | -7.8529088 | -1.7893002 | 1.5003329  |
| H | -6.7992878 | -1.9146152 | 1.7614059  |
| H | -8.3889878 | -1.3678992 | 2.3561299  |
| H | -8.2808058 | -2.7640602 | 1.2470829  |
| C | -6.6261508 | 1.2528788  | -2.1565401 |
| H | -6.8992568 | 2.3059138  | -2.0410201 |
| H | -5.5606888 | 1.1333628  | -1.9374471 |
| H | -6.8188958 | 0.9370468  | -3.1860401 |
| H | 1.8585952  | -3.1100602 | 1.5570909  |

Zero-point correction= 0.604683 (Hartree/Particle)

Thermal correction to Energy= 0.649650

Thermal correction to Enthalpy= 0.650594

Thermal correction to Gibbs Free Energy= 0.522404

Sum of electronic and zero-point Energies= -2719.360521

Sum of electronic and thermal Energies= -2719.315554

Sum of electronic and thermal Enthalpies= -2719.314610

Sum of electronic and thermal Free Energies= -2719.442800

### **A-int6**

|   |            |            |            |
|---|------------|------------|------------|
| H | -0.2043645 | -3.6160487 | 0.0537293  |
| H | -0.3338045 | -3.2761017 | -1.6789807 |
| H | 1.2270255  | -3.7541917 | -0.9721057 |
| H | 3.1243285  | 4.9053923  | 0.7610143  |
| H | 2.5642245  | 3.2662533  | 0.3504913  |
| H | 3.0488795  | 4.3813873  | -0.9331987 |
| H | -0.5655455 | 5.3541593  | 1.2082413  |
| H | 0.3301915  | 3.9181063  | 1.7458903  |



|   |            |            |            |
|---|------------|------------|------------|
| H | 1.0182725  | 5.5233003  | 1.9790823  |
| H | 0.1891765  | 6.7363243  | -0.7120367 |
| H | 1.7141365  | 6.3616713  | -1.5556337 |
| H | 1.7467435  | 6.9452433  | 0.1156343  |
| H | 0.3719185  | 4.5855293  | -2.0082277 |
| H | -5.3689635 | -2.3063567 | -1.1357477 |
| H | -1.1158855 | -1.0375657 | 1.3413583  |
| H | -2.0979495 | -2.7187887 | -0.1381967 |
| H | -2.3772765 | -0.7785657 | -3.4727997 |
| H | -0.1104435 | -0.0926337 | -2.7410667 |
| H | 0.6429085  | 2.2761103  | 0.7552483  |
| H | -1.9085505 | 3.8574103  | 0.0892433  |
| H | -4.7442755 | -0.5901047 | 1.2969933  |
| H | -4.5730235 | 4.3920893  | 0.8023663  |
| H | -6.6940585 | 3.2242543  | 1.3841273  |
| H | -6.7419675 | 0.7615863  | 1.6256913  |
| C | 0.3186735  | -3.1662097 | -0.8025027 |
| C | 2.5438205  | 4.3176423  | 0.0386423  |
| C | 0.4331465  | 4.9061513  | 1.2870393  |
| C | 1.1946885  | 6.3147303  | -0.5897987 |
| C | 1.1292255  | 4.8802973  | -0.0712387 |
| N | 0.3389965  | 4.1375423  | -1.0959917 |
| O | 0.1203635  | 2.3302033  | -2.4374437 |
| C | 0.2295025  | 2.7779943  | -1.3108947 |
| O | -4.1738545 | -1.6919827 | -1.8774217 |
| C | -1.5197745 | -0.6923997 | 0.3760013  |
| C | -2.5464025 | -1.7163097 | -0.1113677 |

|    |            |            |            |
|----|------------|------------|------------|
| C  | -3.0263015 | -1.4303027 | -1.5041397 |
| C  | -2.0543175 | -0.8843447 | -2.4399467 |
| C  | -0.8289315 | -0.5080447 | -2.0368367 |
| C  | -0.3356065 | -0.6056597 | -0.6178537 |
| C  | 0.6874045  | -1.7464487 | -0.5420817 |
| C  | 1.9208865  | -1.2872247 | -0.2514957 |
| O  | 2.6923355  | 0.9745163  | 0.2588963  |
| C  | 1.8200535  | 0.1757263  | -0.0642277 |
| N  | 0.5101995  | 0.5356683  | -0.3006797 |
| C  | 0.0502205  | 1.8769033  | -0.0805147 |
| C  | -2.1231455 | 0.6829903  | 0.5142673  |
| C  | -1.3987095 | 1.8180173  | 0.2702343  |
| N  | -2.1903735 | 2.9347333  | 0.3893123  |
| C  | -4.6757615 | 0.4861623  | 1.1609853  |
| C  | -3.4690675 | 1.1176793  | 0.8116403  |
| C  | -3.4702535 | 2.5325283  | 0.7014443  |
| C  | -4.6099615 | 3.3088763  | 0.8993823  |
| C  | -5.7836095 | 2.6513543  | 1.2245663  |
| C  | -5.8103745 | 1.2546003  | 1.3582823  |
| Au | 3.7570615  | -2.1552357 | 0.0059733  |
| C  | 7.9168455  | -2.7578537 | 0.7830063  |
| C  | 7.5945075  | -4.0471457 | 0.5259573  |
| H  | 8.8590765  | -2.2992617 | 1.0470053  |
| H  | 8.1967235  | -4.9443667 | 0.5194863  |
| C  | 5.7096225  | -2.8218077 | 0.3137663  |
| N  | 6.2409465  | -4.0651897 | 0.2413243  |
| N  | 6.7527995  | -2.0241147 | 0.6485473  |

|   |            |            |            |
|---|------------|------------|------------|
| C | -5.1293795 | -5.0325707 | -0.1013117 |
| F | -4.8630065 | -5.8223227 | 0.9232363  |
| F | -3.9873315 | -4.6060567 | -0.6342657 |
| F | -5.8117295 | -5.6986047 | -1.0114487 |
| S | -6.0895285 | -3.5836017 | 0.4920683  |
| O | -7.3883385 | -4.0685607 | 0.8838823  |
| O | -6.2284425 | -2.7801987 | -0.8379347 |
| O | -5.2069125 | -2.9116547 | 1.4296553  |
| C | 5.4910965  | -5.2616197 | -0.0915397 |
| H | 4.4502355  | -4.9756687 | -0.2614467 |
| H | 5.8920485  | -5.7213637 | -0.9999357 |
| H | 5.5379815  | -5.9809737 | 0.7316213  |
| C | 6.6683135  | -0.5848187 | 0.8419643  |
| H | 7.3208365  | -0.0717577 | 0.1292913  |
| H | 5.6350225  | -0.2638097 | 0.6780263  |
| H | 6.9674185  | -0.3255407 | 1.8618723  |
| H | -3.4006385 | -1.7997547 | 0.5638203  |

Zero-point correction= 0.610362 (Hartree/Particle)

Thermal correction to Energy= 0.654548

Thermal correction to Enthalpy= 0.655492

Thermal correction to Gibbs Free Energy= 0.531224

Sum of electronic and zero-point Energies= -2719.390777

Sum of electronic and thermal Energies= -2719.346592

Sum of electronic and thermal Enthalpies= -2719.345648

Sum of electronic and thermal Free Energies= -2719.469916

#### **A-int7**

|   |           |            |            |
|---|-----------|------------|------------|
| H | 0.5525897 | -0.0455625 | -3.7826243 |
|---|-----------|------------|------------|

|   |            |            |            |
|---|------------|------------|------------|
| H | 1.4166557  | 1.3152565  | -3.0759623 |
| H | 2.1033227  | -0.3212305 | -2.9424363 |
| H | 0.0637757  | 2.4873395  | 3.5006127  |
| H | -0.4908433 | 1.1592785  | 2.4871787  |
| H | 0.1567657  | 2.6362495  | 1.7355487  |
| H | -3.6945713 | 2.7972145  | 3.6836057  |
| H | -2.9131723 | 1.2216745  | 3.4592067  |
| H | -2.2520103 | 2.3687715  | 4.6309277  |
| H | -2.6133473 | 4.9164745  | 2.9131917  |
| H | -1.0076323 | 4.8747165  | 2.1400457  |
| H | -1.1772953 | 4.5184425  | 3.8713957  |
| H | -2.9144573 | 3.7628385  | 0.9678377  |
| H | -2.1084463 | -1.0040075 | -2.1929733 |
| H | -3.1595213 | 0.2489795  | -4.0706593 |
| H | -1.1981943 | 3.9002355  | -2.7599173 |
| H | -0.1367923 | 2.6624805  | -0.8728323 |
| H | -2.1706733 | 0.3404315  | 1.7353007  |
| H | -5.1147983 | 0.1883345  | -0.7565693 |
| H | -2.2168633 | -2.1027635 | 1.2621017  |
| H | -6.9216023 | -2.1551755 | -1.3847413 |
| H | -3.3524783 | -4.7220865 | 1.0294907  |
| H | -5.3382823 | -5.8785425 | 0.0834007  |
| H | -7.0948763 | -4.6123305 | -1.1065223 |
| C | 1.1713367  | 0.2547285  | -2.9270523 |
| C | -0.4530013 | 2.2507445  | 2.5624277  |
| C | -2.7258923 | 2.2852495  | 3.6450707  |
| C | -1.6478193 | 4.3945095  | 2.8902147  |

|    |            |            |            |
|----|------------|------------|------------|
| C  | -1.8311893 | 2.9113075  | 2.5760827  |
| N  | -2.4937753 | 2.8841665  | 1.2520907  |
| O  | -3.7709453 | 2.1384475  | -0.4383953 |
| C  | -2.9911913 | 1.8821505  | 0.4646577  |
| O  | -2.6955533 | 2.7644915  | -4.5462903 |
| C  | -1.9098823 | 0.0549485  | -2.3654523 |
| C  | -2.4708303 | 0.7248745  | -3.3766113 |
| C  | -2.2170923 | 2.1604475  | -3.5990583 |
| C  | -1.3430473 | 2.8321495  | -2.6147153 |
| C  | -0.7823253 | 2.1678955  | -1.6014613 |
| C  | -0.9272633 | 0.6850575  | -1.4211683 |
| C  | 0.4517307  | 0.0428505  | -1.6442343 |
| C  | 0.8572937  | -0.6514605 | -0.5587963 |
| O  | -0.3016293 | -1.1171715 | 1.5388867  |
| C  | -0.2194153 | -0.5506525 | 0.4525827  |
| N  | -1.1837703 | 0.3133505  | -0.0314973 |
| C  | -2.4548263 | 0.4707795  | 0.6832577  |
| C  | -4.6185083 | -0.6645705 | -0.3156713 |
| C  | -3.4246693 | -0.6194285 | 0.3525477  |
| N  | -3.0700613 | -1.8985235 | 0.7529747  |
| C  | -6.1443853 | -2.7078245 | -0.8603603 |
| C  | -5.0327813 | -2.0345535 | -0.3346813 |
| C  | -4.0369923 | -2.7828035 | 0.3421997  |
| C  | -4.1267063 | -4.1656525 | 0.5052247  |
| C  | -5.2373943 | -4.8008305 | -0.0254873 |
| C  | -6.2367713 | -4.0796305 | -0.7025903 |
| Au | 2.6008697  | -1.7061875 | -0.2461133 |

|   |           |            |            |
|---|-----------|------------|------------|
| C | 6.6320337 | -3.0902515 | -0.3469523 |
| C | 6.4698817 | -3.0121055 | 0.9959547  |
| H | 7.4958577 | -3.3386315 | -0.9462413 |
| H | 7.1641067 | -3.1756125 | 1.8073167  |
| C | 4.4873247 | -2.5274285 | 0.0456887  |
| N | 5.1488417 | -2.6738745 | 1.2146337  |
| N | 5.4056537 | -2.7947395 | -0.9099083 |
| C | 5.0220777 | 2.9918975  | -0.4588743 |
| F | 6.3398197 | 2.9282835  | -0.5336703 |
| F | 4.6671027 | 3.6898985  | 0.6007737  |
| F | 4.5390887 | 3.5479615  | -1.5510253 |
| S | 4.4089657 | 1.2632075  | -0.3094863 |
| O | 4.7244087 | 0.5891395  | -1.5541733 |
| O | 2.8729457 | 1.6614215  | -0.2407673 |
| O | 4.8900717 | 0.7488575  | 0.9560557  |
| C | 4.5799737 | -2.3469645 | 2.5115587  |
| H | 3.5200177 | -2.6116265 | 2.5150547  |
| H | 5.0986927 | -2.9143775 | 3.2883737  |
| H | 4.6809427 | -1.2730045 | 2.6988537  |
| C | 5.1524627 | -2.6537045 | -2.3349443 |
| H | 5.9326807 | -3.1790725 | -2.8910003 |
| H | 4.1811147 | -3.0928495 | -2.5759403 |
| H | 5.1472707 | -1.5927135 | -2.6068453 |
| H | 2.2878997 | 0.8604075  | -0.3376263 |

Zero-point correction= 0.607496 (Hartree/Particle)

Thermal correction to Energy= 0.653905

Thermal correction to Enthalpy= 0.654849

Thermal correction to Gibbs Free Energy= 0.523408

Sum of electronic and zero-point Energies= -2719.344888

Sum of electronic and thermal Energies= -2719.298479

Sum of electronic and thermal Enthalpies= -2719.297535

Sum of electronic and thermal Free Energies= -2719.428976

**A-ts7**

|   |            |            |            |
|---|------------|------------|------------|
| H | 1.2543919  | 0.0723933  | 3.3929714  |
| H | 0.9815379  | -1.6621247 | 3.2497174  |
| H | 2.4609089  | -0.9358297 | 2.5489834  |
| H | -0.3918931 | -3.4369467 | -2.9584796 |
| H | -0.6288601 | -1.8190277 | -2.3223796 |
| H | -0.3311861 | -3.1785277 | -1.2105966 |
| H | -4.1057111 | -2.8996097 | -3.3166836 |
| H | -2.9727331 | -1.5356937 | -3.3746116 |
| H | -2.5874141 | -3.0317877 | -4.2336056 |
| H | -3.5682421 | -4.9889397 | -2.0336776 |
| H | -2.0066361 | -5.1375897 | -1.1850256 |
| H | -2.0661641 | -5.1520547 | -2.9589736 |
| H | -3.6356451 | -3.3936527 | -0.4257936 |
| H | -1.3553571 | 1.3625023  | 1.9134974  |
| H | -2.6449391 | 0.7681733  | 3.9577874  |
| H | -2.0728011 | -3.4578337 | 3.1165944  |
| H | -0.7722291 | -2.8888937 | 1.0729224  |
| H | -2.1176101 | -0.4303417 | -1.7949006 |
| H | -4.7208311 | 0.9040283  | 0.7460804  |
| H | -1.4634001 | 1.9626863  | -1.7010796 |
| H | -5.7192891 | 3.7352163  | 1.1074334  |

|   |            |            |            |
|---|------------|------------|------------|
| H | -1.7875391 | 4.8084943  | -1.8161066 |
| H | -3.2698001 | 6.6093573  | -0.9572336 |
| H | -5.2051191 | 6.0786813  | 0.4836764  |
| C | 1.3908859  | -0.7903787 | 2.7265754  |
| C | -0.8440941 | -2.8746857 | -2.1328446 |
| C | -3.0435271 | -2.6282477 | -3.3213566 |
| C | -2.5074961 | -4.7070577 | -2.0610786 |
| C | -2.3393031 | -3.1895097 | -2.0873246 |
| N | -3.0075101 | -2.7180297 | -0.8490026 |
| O | -4.0697031 | -1.3704967 | 0.6009354  |
| C | -3.2456791 | -1.4930477 | -0.2910026 |
| O | -2.9982841 | -1.6790837 | 4.7637064  |
| C | -1.4961881 | 0.3273933  | 2.2295814  |
| C | -2.1868001 | 0.0096423  | 3.3276194  |
| C | -2.4053591 | -1.3911477 | 3.7372854  |
| C | -1.8620701 | -2.4283987 | 2.8362554  |
| C | -1.1706301 | -2.1220897 | 1.7362994  |
| C | -0.8393321 | -0.7053047 | 1.3547124  |
| C | 0.6831869  | -0.5462847 | 1.4512514  |
| C | 1.2073269  | -0.1711757 | 0.2523314  |
| O | 0.1099129  | 0.4824463  | -1.8216296 |
| C | 0.0782669  | 0.0169883  | -0.6895946 |
| N | -1.0619471 | -0.4336577 | -0.0640086 |
| C | -2.3648771 | -0.3258487 | -0.7291356 |
| C | -4.0378301 | 1.5097963  | 0.1679594  |
| C | -2.9679961 | 1.0297173  | -0.5381706 |
| N | -2.2968661 | 2.0859513  | -1.1361636 |



|    |            |            |            |
|----|------------|------------|------------|
| C  | -4.8633421 | 3.9634973  | 0.4753054  |
| C  | -4.0393951 | 2.9316953  | 0.0044144  |
| C  | -2.9324121 | 3.2606773  | -0.8176866 |
| C  | -2.6373361 | 4.5764403  | -1.1771896 |
| C  | -3.4703741 | 5.5727523  | -0.6949816 |
| C  | -4.5723161 | 5.2701593  | 0.1244894  |
| Au | 2.9341969  | 1.1320723  | 0.1775644  |
| C  | 6.7764279  | 2.8600793  | -0.1349236 |
| C  | 6.0835799  | 4.0054233  | 0.0748504  |
| H  | 7.8309469  | 2.6867663  | -0.2934236 |
| H  | 6.4082989  | 5.0336493  | 0.1411054  |
| C  | 4.6128209  | 2.3043813  | 0.0967094  |
| N  | 4.7568419  | 3.6432183  | 0.2138454  |
| N  | 5.8601479  | 1.8286153  | -0.1157606 |
| C  | 2.8246909  | -3.9629027 | 0.3643764  |
| F  | 3.4966949  | -4.7362227 | 1.1988394  |
| F  | 2.4635169  | -4.6659157 | -0.6961866 |
| F  | 1.7181169  | -3.5286017 | 0.9791174  |
| S  | 3.8434649  | -2.5204537 | -0.1359366 |
| O  | 4.1088349  | -1.8127917 | 1.1212864  |
| O  | 2.8557749  | -1.7725497 | -1.0096676 |
| O  | 4.9728359  | -3.0512097 | -0.8761446 |
| C  | 3.6758239  | 4.5802483  | 0.4599224  |
| H  | 2.7358169  | 4.0243583  | 0.4857154  |
| H  | 3.8230119  | 5.0856673  | 1.4189034  |
| H  | 3.6323469  | 5.3233143  | -0.3415116 |
| C  | 6.1783309  | 0.4196543  | -0.3359136 |

|   |           |            |            |
|---|-----------|------------|------------|
| H | 7.2601569 | 0.2903313  | -0.2646916 |
| H | 5.6867609 | -0.2009967 | 0.4199254  |
| H | 5.8399779 | 0.1046193  | -1.3277306 |
| H | 2.1382309 | -0.8861487 | -0.2983426 |

Zero-point correction= 0.603239 (Hartree/Particle)

Thermal correction to Energy= 0.648715

Thermal correction to Enthalpy= 0.649660

Thermal correction to Gibbs Free Energy= 0.521448

Sum of electronic and zero-point Energies= -2719.335686

Sum of electronic and thermal Energies= -2719.290211

Sum of electronic and thermal Enthalpies= -2719.289266

Sum of electronic and thermal Free Energies= -2719.417477

### **A-int8**

|   |            |            |            |
|---|------------|------------|------------|
| H | 1.3415469  | -2.6306007 | 2.2104587  |
| H | 0.9836209  | -4.0100647 | 1.1624197  |
| H | 2.4208319  | -2.9938637 | 0.8420507  |
| H | -4.2981741 | -2.6245077 | -3.3339783 |
| H | -2.9818051 | -1.6971397 | -2.6240373 |
| H | -3.6263141 | -3.1187967 | -1.7678073 |
| H | -6.0700721 | 0.4296603  | -1.9743133 |
| H | -4.4039321 | 0.5205243  | -2.5704863 |
| H | -5.6092201 | -0.3965677 | -3.4791483 |
| H | -7.0289671 | -1.6837037 | -1.0615583 |
| H | -6.0468641 | -3.1708207 | -1.0112173 |
| H | -6.5977151 | -2.5148527 | -2.5653513 |
| H | -5.2918201 | -1.3092117 | 0.4151057  |
| H | -0.2073821 | 0.2954253  | 1.6795457  |

|   |            |            |            |
|---|------------|------------|------------|
| H | -0.8321451 | -0.3274907 | 3.9958067  |
| H | -2.5969331 | -4.0280437 | 2.5552207  |
| H | -1.8957921 | -3.4632667 | 0.2301377  |
| H | -2.6827191 | 0.0006323  | -1.6418653 |
| H | -2.4816731 | 2.0518283  | 1.6775247  |
| H | -0.7565101 | 1.4558823  | -2.1178593 |
| H | -1.0247441 | 4.6554323  | 2.2167977  |
| H | 0.8366869  | 3.8070743  | -2.3635193 |
| H | 1.5478399  | 5.7903873  | -1.0421493 |
| H | 0.6295579  | 6.2032753  | 1.2144807  |
| C | 1.3759819  | -2.9846697 | 1.1731837  |
| C | -3.8949811 | -2.2523387 | -2.3845163 |
| C | -5.2731171 | -0.1385827 | -2.4675903 |
| C | -6.2335811 | -2.2447557 | -1.5686453 |
| C | -4.9595071 | -1.4107497 | -1.6817803 |
| N | -4.5877211 | -1.0939937 | -0.2831273 |
| O | -3.6073951 | -0.1036247 | 1.4802067  |
| C | -3.5872741 | -0.3673417 | 0.2874077  |
| O | -1.9732601 | -2.5831657 | 4.6200627  |
| C | -0.6650261 | -0.6665047 | 1.9106177  |
| C | -0.9996461 | -1.0018877 | 3.1592507  |
| C | -1.6865341 | -2.2669897 | 3.4780547  |
| C | -2.0243431 | -3.1322037 | 2.3264747  |
| C | -1.6548211 | -2.8253027 | 1.0819537  |
| C | -0.8341341 | -1.6043587 | 0.7477047  |
| C | 0.5427259  | -2.1250507 | 0.2957307  |
| C | 0.7220699  | -1.8446517 | -1.0351163 |

|    |            |            |            |
|----|------------|------------|------------|
| O  | -0.6428491 | -0.6444687 | -2.6577543 |
| C  | -0.4619981 | -1.1073827 | -1.5416843 |
| N  | -1.3354351 | -0.9759357 | -0.4815533 |
| C  | -2.4026651 | 0.0352283  | -0.5840123 |
| C  | -1.9014541 | 2.2332573  | 0.7827657  |
| C  | -1.8552271 | 1.3999813  | -0.3031573 |
| N  | -1.0001641 | 1.9322443  | -1.2567723 |
| C  | -0.6156371 | 4.4601733  | 1.2275507  |
| C  | -1.0164681 | 3.3249393  | 0.5084007  |
| C  | -0.4655811 | 3.1025913  | -0.7783073 |
| C  | 0.4490039  | 3.9809683  | -1.3610003 |
| C  | 0.8337599  | 5.0863273  | -0.6197533 |
| C  | 0.3084799  | 5.3223673  | 0.6633967  |
| Au | 1.9349579  | -0.1219517 | -0.1004953 |
| C  | 4.6514809  | 2.4608083  | 1.8180547  |
| C  | 4.7087989  | 2.9879543  | 0.5711377  |
| H  | 5.2012709  | 2.6964653  | 2.7171677  |
| H  | 5.3254289  | 3.7717673  | 0.1570637  |
| C  | 3.1543869  | 1.3837743  | 0.5549357  |
| N  | 3.7704719  | 2.3202393  | -0.1867163 |
| N  | 3.6818309  | 1.4788813  | 1.7901517  |
| C  | 6.1590919  | -2.6510767 | -0.9113773 |
| F  | 7.1570439  | -2.5661817 | -0.0402843 |
| F  | 6.6327479  | -2.4179197 | -2.1288323 |
| F  | 5.6670319  | -3.8852127 | -0.8752643 |
| S  | 4.8491709  | -1.4369327 | -0.4969633 |
| O  | 4.4306309  | -1.8323247 | 0.8654687  |

|   |           |            |            |
|---|-----------|------------|------------|
| O | 3.8179189 | -1.6914747 | -1.5288083 |
| O | 5.5141499 | -0.1314137 | -0.5941503 |
| C | 3.6663089 | 2.3972323  | -1.6323693 |
| H | 3.9324029 | 3.4051923  | -1.9618043 |
| H | 4.3376099 | 1.6521033  | -2.0739783 |
| H | 2.6332309 | 2.1873763  | -1.9248283 |
| C | 3.3987179 | 0.5428493  | 2.8680827  |
| H | 2.3158109 | 0.4480063  | 2.9977167  |
| H | 3.8306249 | -0.4323387 | 2.6132367  |
| H | 3.8364099 | 0.9252623  | 3.7928347  |
| H | 1.5119659 | -2.2363957 | -1.6742313 |

Zero-point correction= 0.607390 (Hartree/Particle)

Thermal correction to Energy= 0.653699

Thermal correction to Enthalpy= 0.654643

Thermal correction to Gibbs Free Energy= 0.522949

Sum of electronic and zero-point Energies= -2719.367441

Sum of electronic and thermal Energies= -2719.321132

Sum of electronic and thermal Enthalpies= -2719.320188

Sum of electronic and thermal Free Energies= -2719.451882

**A-ts8**

|   |            |            |           |
|---|------------|------------|-----------|
| C | 2.3740123  | 0.5777495  | 3.3396324 |
| C | 1.9814493  | -0.6605245 | 3.8707694 |
| C | 0.9429113  | -1.3937225 | 3.3067764 |
| C | 0.3211633  | -0.8526255 | 2.1867874 |
| C | 0.7080233  | 0.3830975  | 1.6266914 |
| C | 1.7383313  | 1.1121005  | 2.2262714 |
| N | -0.7542847 | -1.3235625 | 1.4476404 |

|   |            |            |            |
|---|------------|------------|------------|
| C | -1.0439357 | -0.4536815 | 0.4447834  |
| C | -0.1548467 | 0.6347015  | 0.4985564  |
| C | -1.8892817 | -0.8747375 | -0.7208936 |
| N | -1.0081557 | -1.7435625 | -1.5066326 |
| C | 0.1505493  | -1.0981035 | -2.1451806 |
| C | -0.6177297 | -2.9574905 | -0.9306516 |
| C | 0.7466523  | -3.2246135 | -1.3882686 |
| C | 1.2666343  | -2.1430685 | -1.9800306 |
| C | -0.0128217 | -0.9330075 | -3.6627126 |
| C | 0.7846403  | -0.1081025 | -4.3460266 |
| C | 1.7634263  | 0.7895075  | -3.6585316 |
| C | 1.4608693  | 1.0920755  | -2.2025206 |
| C | 0.3222603  | 0.3404155  | -1.7391906 |
| O | -1.2482817 | -3.5884535 | -0.1031756 |
| O | 2.6663813  | 1.3161435  | -4.2738756 |
| C | -3.2965597 | -1.4252755 | -0.4428396 |
| O | -3.7473547 | -2.3958885 | -1.0154926 |
| N | -3.9486897 | -0.6152475 | 0.4358454  |
| C | -5.4233357 | -0.5914315 | 0.5688474  |
| C | -5.9037937 | -1.9080735 | 1.1643154  |
| C | -6.0688147 | -0.3262495 | -0.7890716 |
| C | -5.7266297 | 0.5611765  | 1.5180024  |
| C | 2.6367533  | -2.0797915 | -2.5553976 |
| H | 3.1801073  | 1.1319605  | 3.8169854  |
| H | 2.4850003  | -1.0468365 | 4.7544764  |
| H | 0.6207863  | -2.3407125 | 3.7327544  |
| H | 2.0247553  | 2.0837685  | 1.8278764  |

|    |            |            |            |
|----|------------|------------|------------|
| H  | -1.1522517 | -2.2587445 | 1.4828644  |
| H  | -0.3569047 | 1.6247355  | 0.0901744  |
| H  | -2.1337287 | 0.0145795  | -1.3135466 |
| H  | 1.2533173  | -4.1613125 | -1.1834066 |
| H  | -0.7365657 | -1.5992415 | -4.1285036 |
| H  | 0.7783223  | -0.0626675 | -5.4323676 |
| H  | 1.2237053  | 2.1662255  | -2.1593436 |
| H  | -0.6044757 | 0.9126945  | -1.7233416 |
| H  | -3.5383007 | 0.3147265  | 0.5119364  |
| H  | -6.9920397 | -1.8770205 | 1.3008794  |
| H  | -5.4385457 | -2.0788945 | 2.1429204  |
| H  | -5.6549397 | -2.7461275 | 0.5069214  |
| H  | -5.6665337 | 0.5980865  | -1.2217896 |
| H  | -5.8735467 | -1.1520405 | -1.4801826 |
| H  | -7.1547417 | -0.2179925 | -0.6743736 |
| H  | -6.8081497 | 0.6480805  | 1.6724554  |
| H  | -5.3652787 | 1.5131225  | 1.1052054  |
| H  | -5.2501927 | 0.4005495  | 2.4933864  |
| H  | 2.6136323  | -1.9018115 | -3.6366946 |
| H  | 3.2407043  | -1.2719755 | -2.1185736 |
| H  | 3.1525233  | -3.0288385 | -2.3788806 |
| Au | 3.1668163  | 0.9198725  | -0.9258056 |
| C  | 6.1001763  | -0.0386275 | 2.0166574  |
| C  | 6.5390193  | 1.2012075  | 1.6947154  |
| H  | 6.4610613  | -0.7560095 | 2.7396474  |
| H  | 7.3593123  | 1.7893525  | 2.0804264  |
| C  | 4.7569083  | 0.7532955  | 0.3922994  |

|   |            |            |            |
|---|------------|------------|------------|
| N | 5.7047923  | 1.6686845  | 0.6958454  |
| N | 5.0113063  | -0.2970345 | 1.2059854  |
| C | -2.8686027 | 3.6785065  | 0.5652284  |
| F | -2.4553887 | 2.7537445  | 1.4432694  |
| F | -4.1703097 | 3.8673235  | 0.7569734  |
| F | -2.2303137 | 4.8108945  | 0.8231624  |
| S | -2.5484867 | 3.1045715  | -1.1485376 |
| O | -1.0695877 | 3.0066115  | -1.1937406 |
| O | -3.1474127 | 4.1199975  | -1.9996696 |
| O | -3.2090247 | 1.7774305  | -1.1358526 |
| C | 5.8290933  | 2.9758995  | 0.0733924  |
| H | 6.8229543  | 3.0876225  | -0.3691036 |
| H | 5.0751363  | 3.0595035  | -0.7128046 |
| H | 5.6674083  | 3.7654195  | 0.8130464  |
| C | 4.2397763  | -1.5281165 | 1.2469604  |
| H | 3.3077533  | -1.3768105 | 0.6950904  |
| H | 4.8052623  | -2.3499635 | 0.7964484  |
| H | 3.9861493  | -1.7674425 | 2.2841104  |

Zero-point correction= 0.608086 (Hartree/Particle)

Thermal correction to Energy= 0.652743

Thermal correction to Enthalpy= 0.653687

Thermal correction to Gibbs Free Energy= 0.528340

Sum of electronic and zero-point Energies= -2719.296221

Sum of electronic and thermal Energies= -2719.251565

Sum of electronic and thermal Enthalpies= -2719.250621

Sum of electronic and thermal Free Energies= -2719.375968

**A-int9**



|   |            |            |            |
|---|------------|------------|------------|
| C | -1.3467054 | -3.0391841 | 1.7946542  |
| C | -0.2427074 | -3.0894731 | 2.6441712  |
| C | 0.8756386  | -2.2943281 | 2.4055852  |
| C | 0.8098226  | -1.4409831 | 1.3206382  |
| C | -0.2944194 | -1.3437051 | 0.4690622  |
| C | -1.3718574 | -2.1883081 | 0.6878552  |
| N | 1.8074626  | -0.5590291 | 0.8499832  |
| C | 1.4396566  | 0.0345629  | -0.2573908 |
| C | 0.0890926  | -0.4498641 | -0.6826468 |
| C | 1.9060956  | 1.3869259  | -0.6794068 |
| N | 0.8681866  | 2.1608969  | 0.0076222  |
| C | -0.5435874 | 2.0402879  | -0.4303138 |
| C | 0.9507626  | 2.2148839  | 1.4109992  |
| C | -0.4150214 | 2.4117459  | 1.8884002  |
| C | -1.2920434 | 2.2248559  | 0.8928702  |
| C | -0.9537534 | 3.1778749  | -1.3333198 |
| C | -1.8812624 | 3.0184879  | -2.2845328 |
| C | -2.5674404 | 1.7228209  | -2.5667158 |
| C | -2.0703404 | 0.5073679  | -1.8602188 |
| C | -0.6870494 | 0.7405219  | -1.2675468 |
| O | 1.9634076  | 2.0215519  | 2.0553862  |
| O | -3.5049124 | 1.7088109  | -3.3570248 |
| C | 3.3188156  | 1.8835199  | -0.3150878 |
| O | 3.5173416  | 3.0758339  | -0.1996318 |
| N | 4.2296236  | 0.8850369  | -0.1835628 |
| C | 5.6505626  | 1.1334869  | 0.1389492  |
| C | 5.7345296  | 1.7912869  | 1.5115832  |

|   |            |            |            |
|---|------------|------------|------------|
| C | 6.3118856  | 2.0017119  | -0.9277518 |
| C | 6.3134466  | -0.2365531 | 0.1729012  |
| C | -2.7660304 | 2.3405849  | 1.0430632  |
| H | -2.1930524 | -3.6975411 | 1.9797672  |
| H | -0.2412984 | -3.7742611 | 3.4881892  |
| H | 1.7629966  | -2.3509091 | 3.0302392  |
| H | -2.2150254 | -2.1974631 | -0.0014908 |
| H | 2.6751136  | -0.3180661 | 1.3251992  |
| H | 0.2869226  | -1.1568551 | -1.5148978 |
| H | 1.8064826  | 1.5046549  | -1.7634688 |
| H | -0.6432594 | 2.6159049  | 2.9286352  |
| H | -0.4959764 | 4.1450229  | -1.1249658 |
| H | -2.2047444 | 3.8532729  | -2.9038068 |
| H | -1.9839444 | -0.2750501 | -2.6312008 |
| H | -0.0645754 | 0.9863439  | -2.1463028 |
| H | 4.0204566  | 0.0279529  | -0.7034378 |
| H | 6.7854276  | 1.9353619  | 1.7911002  |
| H | 5.2587976  | 1.1555099  | 2.2694122  |
| H | 5.2322246  | 2.7625419  | 1.5147102  |
| H | 6.2339366  | 1.5245959  | -1.9123108 |
| H | 5.8403376  | 2.9870519  | -0.9752478 |
| H | 7.3763666  | 2.1314729  | -0.6954298 |
| H | 7.3676016  | -0.1379231 | 0.4554142  |
| H | 6.2665946  | -0.7206541 | -0.8102278 |
| H | 5.8206716  | -0.8969951 | 0.8985992  |
| H | -3.2352634 | 2.8157069  | 0.1748812  |
| H | -3.2274404 | 1.3480399  | 1.1461042  |

|    |            |            |            |
|----|------------|------------|------------|
| H  | -3.0094864 | 2.9221299  | 1.9385452  |
| Au | -3.7664714 | -0.2360791 | -0.8094898 |
| C  | -7.1994204 | -1.7742381 | 1.2756672  |
| C  | -7.7571084 | -1.4684751 | 0.0807182  |
| H  | -7.6273194 | -2.1929541 | 2.1752502  |
| H  | -8.7710574 | -1.5719661 | -0.2782558 |
| C  | -5.5704034 | -0.9327951 | -0.0388878 |
| N  | -6.7464274 | -0.9528281 | -0.7090148 |
| N  | -5.8598804 | -1.4405681 | 1.1822792  |
| C  | 3.9259226  | -3.1528921 | -0.9534298 |
| F  | 3.7181816  | -2.6361641 | 0.2701052  |
| F  | 5.1791186  | -2.8779101 | -1.2986928 |
| F  | 3.7816506  | -4.4648671 | -0.8774048 |
| S  | 2.7474816  | -2.4297211 | -2.1635838 |
| O  | 1.4416106  | -2.9040591 | -1.6849928 |
| O  | 3.2139176  | -2.9121151 | -3.4524808 |
| O  | 2.9389616  | -0.9629421 | -1.9341248 |
| C  | -6.9266774 | -0.5166461 | -2.0861338 |
| H  | -7.7843454 | 0.1588659  | -2.1481818 |
| H  | -6.0273954 | 0.0134589  | -2.4134248 |
| H  | -7.0925374 | -1.3785661 | -2.7390948 |
| C  | -4.9076434 | -1.5733091 | 2.2695882  |
| H  | -3.8989684 | -1.4154071 | 1.8770162  |
| H  | -5.1092294 | -0.8321531 | 3.0496442  |
| H  | -4.9710234 | -2.5771441 | 2.7003392  |

Zero-point correction= 0.610607 (Hartree/Particle)

Thermal correction to Energy= 0.655027

Thermal correction to Enthalpy= 0.655971

Thermal correction to Gibbs Free Energy= 0.531158

Sum of electronic and zero-point Energies= -2719.343404

Sum of electronic and thermal Energies= -2719.298984

Sum of electronic and thermal Enthalpies= -2719.298039

Sum of electronic and thermal Free Energies= -2719.422853

**A-ts9**

|   |            |            |            |
|---|------------|------------|------------|
| C | -0.2167956 | 4.3288392  | 0.0087205  |
| C | -1.4947646 | 4.6618502  | 0.4816995  |
| C | -2.5320846 | 3.7432172  | 0.4455095  |
| C | -2.2433896 | 2.4790312  | -0.0576785 |
| C | -0.9670546 | 2.1217462  | -0.5459075 |
| C | 0.0559234  | 3.0759732  | -0.5191075 |
| N | -3.0810046 | 1.3708072  | -0.1783835 |
| C | -2.3990216 | 0.3475942  | -0.7334325 |
| C | -1.0887746 | 0.7596142  | -1.0369305 |
| C | -2.6637846 | -1.1283818 | -0.5423155 |
| N | -1.6542436 | -1.5248438 | 0.4514475  |
| C | -0.2097056 | -1.4110028 | 0.1141825  |
| C | -1.8820286 | -0.9224918 | 1.7125855  |
| C | -0.5795316 | -0.7741588 | 2.3427805  |
| C | 0.3974124  | -1.0150998 | 1.4549125  |
| C | 0.4558314  | -2.6559268 | -0.4313645 |
| C | 1.2314774  | -2.6624048 | -1.5291635 |
| C | 1.5360614  | -1.4961108 | -2.4240115 |
| C | 1.1350584  | -0.1743718 | -1.8341955 |
| C | -0.1820996 | -0.4296918 | -1.0945405 |

|   |            |            |            |
|---|------------|------------|------------|
| O | -2.9762586 | -0.5473198 | 2.0926795  |
| O | 2.0676414  | -1.6319098 | -3.5055375 |
| C | -4.0657036 | -1.6042078 | -0.1308065 |
| O | -4.2204796 | -2.6613808 | 0.4392455  |
| N | -5.0743146 | -0.7702438 | -0.5275465 |
| C | -6.5056906 | -1.0270568 | -0.2534635 |
| C | -6.7079616 | -1.1023098 | 1.2561825  |
| C | -6.9690236 | -2.3094698 | -0.9367675 |
| C | -7.2625676 | 0.1684542  | -0.8168865 |
| C | 1.8427224  | -1.0582988 | 1.7513105  |
| H | 0.5750174  | 5.0730252  | 0.0502215  |
| H | -1.6755306 | 5.6564252  | 0.8810775  |
| H | -3.5259516 | 3.9935792  | 0.8080175  |
| H | 1.0519374  | 2.8333072  | -0.8912965 |
| H | -3.9475386 | 1.2275222  | 0.3303665  |
| H | -0.0316756 | 0.5614012  | -2.2370025 |
| H | -2.4567626 | -1.6738908 | -1.4733635 |
| H | -0.4565276 | -0.4860668 | 3.3803765  |
| H | 0.3471054  | -3.5641438 | 0.1608255  |
| H | 1.7250804  | -3.5816678 | -1.8371405 |
| H | 1.1413394  | 0.6694442  | -2.6018985 |
| H | -0.7170776 | -1.0736358 | -1.8084465 |
| H | -4.8710856 | -0.0992988 | -1.2580835 |
| H | -7.7726116 | -1.2378058 | 1.4815135  |
| H | -6.3654116 | -0.1761238 | 1.7347105  |
| H | -6.1461466 | -1.9353158 | 1.6863295  |
| H | -6.8224906 | -2.2451718 | -2.0223035 |

|    |            |            |            |
|----|------------|------------|------------|
| H  | -6.4134636 | -3.1710398 | -0.5569595 |
| H  | -8.0374256 | -2.4696688 | -0.7471215 |
| H  | -8.3353656 | 0.0580232  | -0.6257155 |
| H  | -7.1258576 | 0.2530982  | -1.9037625 |
| H  | -6.9305656 | 1.1039772  | -0.3468735 |
| H  | 2.2683314  | -2.0555358 | 1.5571705  |
| H  | 2.4240544  | -0.3861048 | 1.1057445  |
| H  | 2.0278244  | -0.7885178 | 2.7959745  |
| Au | 2.8819124  | 0.7278362  | -0.9424415 |
| C  | 6.1996634  | 2.3126332  | 1.2127535  |
| C  | 6.8400474  | 1.7741062  | 0.1479345  |
| H  | 6.5753264  | 2.8008002  | 2.1000635  |
| H  | 7.8922144  | 1.6936442  | -0.0829445 |
| C  | 4.6406054  | 1.4754502  | -0.1744955 |
| N  | 5.8691064  | 1.2710552  | -0.6916755 |
| N  | 4.8474664  | 2.1295022  | 0.9899215  |
| C  | 5.6343104  | -1.8441668 | 1.1119775  |
| F  | 6.6630404  | -1.2472358 | 0.4990665  |
| F  | 6.1145364  | -2.5896878 | 2.0950785  |
| F  | 4.8860794  | -0.8695568 | 1.6641715  |
| S  | 4.6615224  | -2.8483278 | -0.0861845 |
| O  | 4.1483784  | -1.8001138 | -1.0040185 |
| O  | 3.6263514  | -3.4636818 | 0.7552705  |
| O  | 5.6659474  | -3.7375588 | -0.6566135 |
| C  | 6.1280084  | 0.5381902  | -1.9273845 |
| H  | 7.2011704  | 0.3482212  | -1.9967735 |
| H  | 5.5915764  | -0.4171268 | -1.8949095 |

|   |           |           |            |
|---|-----------|-----------|------------|
| H | 5.8033314 | 1.1286962 | -2.7889315 |
| C | 3.8128864 | 2.4371972 | 1.9574545  |
| H | 2.8484134 | 2.4881522 | 1.4438625  |
| H | 3.7697774 | 1.6549942 | 2.7231645  |
| H | 4.0232804 | 3.4007172 | 2.4300735  |

Zero-point correction= 0.602722 (Hartree/Particle)

Thermal correction to Energy= 0.646911

Thermal correction to Enthalpy= 0.647855

Thermal correction to Gibbs Free Energy= 0.526381

Sum of electronic and zero-point Energies= -2719.221971

Sum of electronic and thermal Energies= -2719.177783

Sum of electronic and thermal Enthalpies= -2719.176838

Sum of electronic and thermal Free Energies= -2719.298313

**A-2'**

|   |            |            |            |
|---|------------|------------|------------|
| C | 2.5371447  | -0.4995413 | 2.7591288  |
| C | 2.2595687  | -1.8666013 | 2.5429418  |
| C | 1.0123737  | -2.2743323 | 2.1109908  |
| C | 0.0440657  | -1.2988053 | 1.8594848  |
| C | 0.2733627  | 0.0825057  | 2.0902928  |
| C | 1.5591947  | 0.4919297  | 2.5423928  |
| N | -1.2309333 | -1.4409243 | 1.3471698  |
| C | -1.7861843 | -0.1900793 | 1.2303508  |
| C | -0.9105023 | 0.7650177  | 1.6919228  |
| C | -2.9567233 | 0.2849917  | 0.4166728  |
| N | -2.3525353 | 1.1618677  | -0.5989242 |
| C | -1.6173593 | 2.3437367  | -0.1083782 |
| C | -1.5393773 | 0.4524737  | -1.4990832 |

|   |            |            |            |
|---|------------|------------|------------|
| C | -0.4565533 | 1.3532417  | -1.8911512 |
| C | -0.4092043 | 2.3937397  | -1.0504262 |
| C | -2.3829823 | 3.6297957  | -0.2617102 |
| C | -2.1353443 | 4.6857837  | 0.5265878  |
| C | -1.1175463 | 4.6683247  | 1.6057278  |
| C | -0.4784933 | 3.3288787  | 1.9508418  |
| C | -1.3082253 | 2.1742497  | 1.4251898  |
| O | -1.6772693 | -0.7257013 | -1.7742142 |
| O | -0.8011823 | 5.6857377  | 2.1895488  |
| C | -3.9292833 | -0.7164663 | -0.2169792 |
| O | -4.5803363 | -0.4230213 | -1.1976002 |
| N | -4.0275403 | -1.8961913 | 0.4631968  |
| C | -4.9197173 | -3.0062073 | 0.0648668  |
| C | -4.5458533 | -3.4596893 | -1.3425092 |
| C | -6.3813863 | -2.5751953 | 0.1326238  |
| C | -4.6595173 | -4.1324253 | 1.0565728  |
| C | 0.6336007  | 3.4548957  | -1.0702852 |
| H | 3.5193287  | -0.2127903 | 3.1265858  |
| H | 3.0584797  | -2.5886103 | 2.6729818  |
| H | 0.8049767  | -3.3260213 | 1.9277058  |
| H | 1.7365257  | 1.5159807  | 2.8690528  |
| H | -1.5678913 | -2.2446963 | 0.8324948  |
| H | -3.5955883 | 0.9235847  | 1.0476998  |
| H | 0.2538437  | 1.1227707  | -2.6798362 |
| H | -3.1046253 | 3.6761827  | -1.0767292 |
| H | -2.6505743 | 5.6346817  | 0.3924778  |
| H | -0.3864153 | 3.2870687  | 3.0432188  |



|    |            |            |            |
|----|------------|------------|------------|
| H  | -2.3011083 | 2.3112887  | 1.8872008  |
| H  | -3.6636653 | -1.9256863 | 1.4074998  |
| H  | -5.1534863 | -4.3275333 | -1.6259802 |
| H  | -3.4877203 | -3.7463453 | -1.3828892 |
| H  | -4.7102783 | -2.6589863 | -2.0681612 |
| H  | -6.6456093 | -2.2589193 | 1.1495658  |
| H  | -6.5694683 | -1.7456853 | -0.5546672 |
| H  | -7.0329913 | -3.4134683 | -0.1428502 |
| H  | -5.2775833 | -5.0021433 | 0.8090628  |
| H  | -4.9089283 | -3.8282363 | 2.0823718  |
| H  | -3.6078483 | -4.4479813 | 1.0296628  |
| H  | 0.2461927  | 4.4443537  | -0.8059852 |
| H  | 1.4424587  | 3.2019267  | -0.3671702 |
| H  | 1.0892707  | 3.5152117  | -2.0641842 |
| Au | 2.5698107  | 0.4860667  | 0.4375348  |
| C  | 3.2559347  | -0.1199473 | -3.6614062 |
| C  | 4.0652797  | 0.9536567  | -3.4965692 |
| H  | 3.0682477  | -0.7445143 | -4.5223062 |
| H  | 4.7405367  | 1.4478117  | -4.1792432 |
| C  | 3.0580577  | 0.5595647  | -1.5393522 |
| N  | 3.9142297  | 1.3692837  | -2.1891412 |
| N  | 2.6350747  | -0.3427023 | -2.4478152 |
| C  | 6.0319497  | -0.9286543 | 1.4091448  |
| F  | 7.3478557  | -0.7890333 | 1.4458468  |
| F  | 5.6512467  | -1.6382063 | 2.4755728  |
| F  | 5.4910637  | 0.2988487  | 1.5412208  |
| S  | 5.4873167  | -1.7277633 | -0.1587072 |

|   |           |            |            |
|---|-----------|------------|------------|
| O | 5.7421737 | -0.6717263 | -1.1518772 |
| O | 4.0490297 | -1.9762993 | 0.1066188  |
| O | 6.3196587 | -2.9217743 | -0.2356892 |
| C | 4.8011447 | 2.3043417  | -1.5196062 |
| H | 5.1719627 | 3.0333407  | -2.2444212 |
| H | 4.2517357 | 2.8238327  | -0.7295502 |
| H | 5.6306937 | 1.7378907  | -1.0822052 |
| C | 1.7936467 | -1.4920503 | -2.1315652 |
| H | 0.8028747 | -1.1698913 | -1.7887562 |
| H | 1.6710757 | -2.0890013 | -3.0379542 |
| H | 2.2999457 | -2.0838873 | -1.3603072 |
| H | 0.5468947 | 3.3228797  | 1.5561588  |

Zero-point correction= 0.610115 (Hartree/Particle)

Thermal correction to Energy= 0.654273

Thermal correction to Enthalpy= 0.655217

Thermal correction to Gibbs Free Energy= 0.531805

Sum of electronic and zero-point Energies= -2719.372490

Sum of electronic and thermal Energies= -2719.328332

Sum of electronic and thermal Enthalpies= -2719.327388

Sum of electronic and thermal Free Energies= -2719.450799

### **B-1**

|    |           |            |            |
|----|-----------|------------|------------|
| Au | 4.1008807 | -0.2453596 | 0.6217556  |
| C  | 7.3948917 | -1.7231986 | -1.5576964 |
| C  | 8.0459957 | -1.4404526 | -0.4041824 |
| H  | 7.7480937 | -2.1390966 | -2.4903934 |
| H  | 9.0830917 | -1.5573496 | -0.1243044 |
| C  | 5.8922267 | -0.8869266 | -0.1220934 |

|   |            |            |            |
|---|------------|------------|------------|
| N | 7.1050487  | -0.9282896 | 0.4683216  |
| N | 6.0720257  | -1.3770756 | -1.3666204 |
| C | 7.4075957  | -0.4951326 | 1.8230746  |
| H | 6.4775617  | -0.2012526 | 2.3144876  |
| H | 7.8646607  | -1.3153476 | 2.3828676  |
| H | 8.0900107  | 0.3589294  | 1.8022786  |
| C | 5.0396877  | -1.5265266 | -2.3876374 |
| H | 5.0116337  | -2.5651426 | -2.7269654 |
| H | 4.0628047  | -1.2606176 | -1.9722584 |
| H | 5.2618607  | -0.8717696 | -3.2345034 |
| C | -6.0232173 | -3.0522336 | 2.0280186  |
| C | -5.0997273 | -4.0708476 | 2.3253306  |
| C | -3.7351063 | -3.8531436 | 2.2485616  |
| C | -3.3144083 | -2.5803516 | 1.8621856  |
| C | -4.2233563 | -1.5408856 | 1.5585236  |
| C | -5.5999673 | -1.7925366 | 1.6480486  |
| N | -2.0431623 | -2.0720356 | 1.7011436  |
| C | -2.1264323 | -0.7499326 | 1.2956136  |
| C | -3.4457063 | -0.3929006 | 1.2062826  |
| C | -0.8682763 | -0.0021846 | 1.0281156  |
| N | -0.1902153 | -0.4657246 | -0.2222174 |
| C | 1.1694527  | -0.4480216 | -0.3370954 |
| C | -0.9514453 | -0.6884166 | -1.4242274 |
| O | 1.7992977  | -0.8016486 | -1.3232794 |
| C | 1.8939857  | 0.0884174  | 0.8326186  |
| C | 2.2793167  | 0.7858534  | 1.7755316  |
| C | -1.7680023 | -1.8117036 | -1.5636434 |

|   |            |            |            |
|---|------------|------------|------------|
| C | -2.5137303 | -1.9920106 | -2.7159104 |
| C | -2.4419323 | -1.0562876 | -3.7503354 |
| C | -1.6185273 | 0.0644464  | -3.6190344 |
| C | -0.8783013 | 0.2435344  | -2.4590624 |
| O | -3.1904993 | -1.2908546 | -4.8451944 |
| H | -0.1726023 | -0.2120986 | 1.8494176  |
| C | -1.0279443 | 1.5247284  | 1.0482946  |
| O | -0.4356723 | 2.1871354  | 1.8936166  |
| N | -1.8077573 | 2.0310444  | 0.0730816  |
| C | -2.1336483 | 3.4631384  | -0.1170314 |
| C | -0.8583993 | 4.2465064  | -0.4084374 |
| C | -3.0726283 | 3.5207824  | -1.3142384 |
| C | -2.8353343 | 4.0012374  | 1.1251746  |
| C | 2.5129837  | 1.6274804  | 2.9326006  |
| H | -7.0868043 | -3.2638356 | 2.1012316  |
| H | -5.4662783 | -5.0501406 | 2.6227096  |
| H | -3.0225343 | -4.6411156 | 2.4817616  |
| H | -6.3190143 | -1.0085696 | 1.4215296  |
| H | -1.1855553 | -2.5768116 | 1.8647036  |
| H | -3.8256433 | 0.5840054  | 0.9331596  |
| H | -1.8258373 | -2.5447066 | -0.7632794 |
| H | -3.1604923 | -2.8557876 | -2.8394244 |
| H | -1.5550273 | 0.7938384  | -4.4256014 |
| H | -0.2348083 | 1.1153454  | -2.3505884 |
| H | -3.0588423 | -0.5937806 | -5.4974554 |
| H | -2.2285213 | 1.3737464  | -0.5739904 |
| H | -0.3626683 | 3.8560174  | -1.3064854 |

|   |            |           |            |
|---|------------|-----------|------------|
| H | -1.0999093 | 5.3013714 | -0.5841954 |
| H | -0.1641633 | 4.1850694 | 0.4348166  |
| H | -3.3548193 | 4.5581844 | -1.5219914 |
| H | -3.9931643 | 2.9538954 | -1.1209824 |
| H | -2.5937523 | 3.1126874 | -2.2146754 |
| H | -3.1133173 | 5.0503774 | 0.9703506  |
| H | -2.1844153 | 3.9389044 | 2.0017036  |
| H | -3.7513203 | 3.4321824 | 1.3273106  |
| H | 1.5461217  | 2.0921644 | 3.1695046  |
| H | 3.2470417  | 2.4105814 | 2.7209146  |
| H | 2.8566147  | 1.0405014 | 3.7903866  |

Zero-point correction= 0.575586 (Hartree/Particle)

Thermal correction to Energy= 0.614300

Thermal correction to Enthalpy= 0.615244

Thermal correction to Gibbs Free Energy= 0.499823

Sum of electronic and zero-point Energies= -1757.956918

Sum of electronic and thermal Energies= -1757.918204

Sum of electronic and thermal Enthalpies= -1757.917260

Sum of electronic and thermal Free Energies= -1758.032681

### **B-ts1**

|   |            |            |            |
|---|------------|------------|------------|
| H | -1.2815279 | 4.2456491  | 0.4622912  |
| H | -2.2675429 | 4.2251391  | -1.0233378 |
| H | -2.9955119 | 3.8212631  | 0.5582012  |
| H | 2.4493491  | -4.2830019 | -1.8337828 |
| H | 1.8823031  | -3.0013739 | -0.7782768 |
| H | 1.3372531  | -3.0684449 | -2.4835338 |
| H | 5.3878971  | -1.9251269 | -1.5109118 |

|   |            |            |            |
|---|------------|------------|------------|
| H | 4.1655231  | -2.0739699 | -0.2310468 |
| H | 4.8003461  | -3.5289019 | -1.0304118 |
| H | 4.7976301  | -2.4455169 | -3.9227368 |
| H | 3.1463971  | -2.9678569 | -4.3364788 |
| H | 4.2263831  | -4.0391439 | -3.4154548 |
| H | 3.7042001  | -0.5946589 | -3.2674698 |
| H | 0.8706231  | 1.7897031  | 1.4856792  |
| H | 1.5784891  | 4.1749611  | 1.7589492  |
| H | 0.8737801  | 4.8624691  | -2.4298808 |
| H | 0.1941921  | 2.4822881  | -2.7041838 |
| H | 0.8978691  | -1.2969329 | -1.0964338 |
| H | 3.8748261  | 0.8578261  | 0.1981992  |
| H | 0.6874851  | -1.6306219 | 1.3940792  |
| H | 5.2276091  | 0.8721551  | 2.9006872  |
| H | 1.3532901  | -2.0689099 | 4.1347762  |
| H | 3.0811011  | -1.4596979 | 5.8097022  |
| H | 4.9856101  | -0.0124059 | 5.2018682  |
| C | -2.0959759 | 3.7283521  | -0.0626238 |
| C | 2.1878221  | -3.2192049 | -1.8076548 |
| C | 4.5018481  | -2.4855469 | -1.1893238 |
| C | 3.9205561  | -2.9977289 | -3.5610338 |
| C | 3.4042161  | -2.4121829 | -2.2478558 |
| N | 3.0876881  | -0.9948629 | -2.5664028 |
| O | 2.4051741  | 1.1409271  | -2.4837298 |
| C | 2.3245711  | 0.0009541  | -2.0443108 |
| O | 1.6769721  | 5.8996791  | -0.0991688 |
| C | 0.8627711  | 2.4743771  | 0.6394752  |

|    |            |            |            |
|----|------------|------------|------------|
| C  | 1.2482251  | 3.7880821  | 0.7993412  |
| C  | 1.2624901  | 4.6469761  | -0.3128528 |
| C  | 0.8484221  | 4.1912381  | -1.5732728 |
| C  | 0.4651111  | 2.8754371  | -1.7291498 |
| C  | 0.4334901  | 2.0017271  | -0.6225568 |
| C  | -1.7988969 | 2.3227911  | -0.2231018 |
| C  | -2.0390789 | 1.0699901  | -0.2693638 |
| O  | -1.1616829 | -1.1564919 | -0.3319458 |
| C  | -0.9798999 | 0.0418711  | -0.4680678 |
| N  | 0.2306571  | 0.6062651  | -0.8215388 |
| C  | 1.3758051  | -0.3341979 | -0.8991258 |
| C  | 3.2410551  | 0.2324311  | 0.8171662  |
| C  | 2.0996181  | -0.3976939 | 0.4002012  |
| N  | 1.5397571  | -1.0906099 | 1.4584492  |
| C  | 4.3836841  | 0.2381061  | 3.1632222  |
| C  | 3.4181701  | -0.0915559 | 2.2003202  |
| C  | 2.3324561  | -0.9219689 | 2.5738972  |
| C  | 2.1900491  | -1.4279599 | 3.8665542  |
| C  | 3.1589471  | -1.0834549 | 4.7926722  |
| C  | 4.2443961  | -0.2583489 | 4.4457452  |
| Au | -3.9986999 | 0.3519671  | 0.0004882  |
| C  | -7.3189639 | -2.2502369 | 0.4422122  |
| C  | -7.9882589 | -1.0765269 | 0.5285662  |
| H  | -7.6665189 | -3.2723489 | 0.4882282  |
| H  | -9.0388209 | -0.8643509 | 0.6660822  |
| C  | -5.8109489 | -0.5952859 | 0.2427012  |
| N  | -7.0464179 | -0.0727289 | 0.4038782  |

|   |            |            |            |
|---|------------|------------|------------|
| N | -5.9851339 | -1.9357759 | 0.2672482  |
| C | -7.3639539 | 1.3446271  | 0.4443942  |
| H | -6.4414349 | 1.9121061  | 0.3041782  |
| H | -8.0657689 | 1.5952121  | -0.3558468 |
| H | -7.8043529 | 1.6046161  | 1.4109962  |
| C | -4.9307599 | -2.9300339 | 0.1260672  |
| H | -5.1160089 | -3.5467639 | -0.7576358 |
| H | -3.9692629 | -2.4216159 | 0.0129822  |
| H | -4.8983409 | -3.5660709 | 1.0148822  |
| H | 1.6976551  | 6.4009231  | -0.9238798 |

Zero-point correction= 0.575761 (Hartree/Particle)

Thermal correction to Energy= 0.614030

Thermal correction to Enthalpy= 0.614974

Thermal correction to Gibbs Free Energy= 0.499022

Sum of electronic and zero-point Energies= -1757.946021

Sum of electronic and thermal Energies= -1757.907752

Sum of electronic and thermal Enthalpies= -1757.906808

Sum of electronic and thermal Free Energies= -1758.022760

**B-int1**

|   |            |            |            |
|---|------------|------------|------------|
| H | -1.4892102 | 3.6898219  | 1.4885596  |
| H | -1.9219202 | 4.1538189  | -0.1605854 |
| H | -3.0456572 | 3.1826759  | 0.8072996  |
| H | 3.1639898  | -3.4877021 | -2.7920184 |
| H | 2.3819878  | -2.6221651 | -1.4792194 |
| H | 1.9448328  | -2.2694041 | -3.1825634 |
| H | 5.7933798  | -1.0713411 | -1.6204254 |
| H | 4.5475388  | -1.7215131 | -0.5292094 |



|   |            |            |            |
|---|------------|------------|------------|
| H | 5.3692538  | -2.7917351 | -1.6859444 |
| H | 5.3319328  | -0.8524321 | -4.1042764 |
| H | 3.7602968  | -1.3693521 | -4.7621034 |
| H | 4.9248308  | -2.5709451 | -4.1618654 |
| H | 4.0894748  | 0.5837099  | -2.8669894 |
| H | 0.5861378  | 1.1488749  | 1.7993426  |
| H | 1.7823168  | 3.2022549  | 2.5950226  |
| H | 1.2928018  | 5.0335249  | -1.2867454 |
| H | 0.2148558  | 2.9502269  | -2.1365234 |
| H | 1.0886308  | -1.0314561 | -1.5559594 |
| H | 3.7681008  | 0.5573449  | 0.7528516  |
| H | 0.3904628  | -1.9661511 | 0.7260386  |
| H | 4.6579518  | -0.2025691 | 3.5393126  |
| H | 0.5974668  | -3.1452361 | 3.3276936  |
| H | 2.0279378  | -3.0810901 | 5.3562596  |
| H | 4.0236848  | -1.6334481 | 5.4589716  |
| C | -1.9884762 | 3.3416299  | 0.5749706  |
| C | 2.7675218  | -2.5095781 | -2.4983724 |
| C | 4.9630898  | -1.7836631 | -1.5412094 |
| C | 4.5107418  | -1.5718881 | -3.9896084 |
| C | 3.8970818  | -1.4937411 | -2.5935594 |
| N | 3.4417828  | -0.0816881 | -2.4533864 |
| O | 2.4966288  | 1.8262649  | -1.7648684 |
| C | 2.4937758  | 0.5914209  | -1.7700724 |
| O | 2.1396028  | 5.2764189  | 1.2200106  |
| C | 0.7630088  | 1.9980849  | 1.1413346  |
| C | 1.3836988  | 3.1164279  | 1.5885416  |

|    |            |            |            |
|----|------------|------------|------------|
| C  | 1.5407048  | 4.2222039  | 0.7071866  |
| C  | 1.0925128  | 4.1913929  | -0.6280034 |
| C  | 0.5326678  | 3.0404319  | -1.1010094 |
| C  | 0.1482198  | 1.9338749  | -0.2076224 |
| C  | -1.4131212 | 2.0722209  | 0.0618786  |
| C  | -2.0242912 | 0.9146569  | -0.2306954 |
| O  | -1.1102212 | -1.2537361 | -0.8620474 |
| C  | -0.9989752 | -0.0513271 | -0.6771604 |
| N  | 0.2122208  | 0.6306449  | -0.8264884 |
| C  | 1.4320298  | -0.1606561 | -0.9870314 |
| C  | 3.0342928  | -0.1735511 | 1.0749926  |
| C  | 1.9648578  | -0.6121251 | 0.3338626  |
| N  | 1.2367548  | -1.5246051 | 1.0681706  |
| C  | 3.7736628  | -0.8341501 | 3.4893266  |
| C  | 2.9775818  | -0.8523721 | 2.3340236  |
| C  | 1.8357848  | -1.6909031 | 2.2991976  |
| C  | 1.4743418  | -2.5039131 | 3.3737196  |
| C  | 2.2789378  | -2.4614811 | 4.4990296  |
| C  | 3.4163968  | -1.6355011 | 4.5574796  |
| Au | -3.9870362 | 0.3024339  | -0.1082064 |
| C  | -7.6206722 | -1.9371611 | -0.1885524 |
| C  | -8.1348402 | -0.7554121 | 0.2255206  |
| H  | -8.0937452 | -2.8882631 | -0.3867934 |
| H  | -9.1478262 | -0.4639231 | 0.4632456  |
| C  | -5.9135522 | -0.4737421 | -0.0343564 |
| N  | -7.0744882 | 0.1272879  | 0.3138286  |
| N  | -6.2607032 | -1.7455631 | -0.3418754 |

|   |            |            |            |
|---|------------|------------|------------|
| C | -7.2053712 | 1.5127329  | 0.7282366  |
| H | -6.2171662 | 1.9775459  | 0.6970376  |
| H | -7.8768592 | 2.0477789  | 0.0505966  |
| H | -7.5978432 | 1.5673539  | 1.7477686  |
| C | -5.3407822 | -2.7829441 | -0.7816074 |
| H | -5.6095822 | -3.1219341 | -1.7861204 |
| H | -4.3268252 | -2.3737381 | -0.8002004 |
| H | -5.3743802 | -3.6300041 | -0.0905464 |
| H | 2.2277818  | 5.9910469  | 0.5725126  |

Zero-point correction= 0.578622 (Hartree/Particle)

Thermal correction to Energy= 0.616235

Thermal correction to Enthalpy= 0.617179

Thermal correction to Gibbs Free Energy= 0.505012

Sum of electronic and zero-point Energies= -1757.963455

Sum of electronic and thermal Energies= -1757.925843

Sum of electronic and thermal Enthalpies= -1757.924899

Sum of electronic and thermal Free Energies= -1758.037066

### **B-ts2**

|   |            |            |            |
|---|------------|------------|------------|
| H | -0.3311323 | -2.0415147 | 3.0173084  |
| H | -0.4726753 | -0.4311977 | 3.7242624  |
| H | -1.8798783 | -1.1799867 | 2.9407204  |
| H | -0.5328293 | 4.6434013  | 0.1618984  |
| H | -0.0859423 | 2.9652523  | 0.5231484  |
| H | 0.6887547  | 4.3080053  | 1.4024754  |
| H | 1.6504077  | 3.6155763  | -2.7479566 |
| H | 0.2302187  | 2.8039613  | -2.0140466 |
| H | 0.1873827  | 4.5251603  | -2.3484506 |

|   |            |            |            |
|---|------------|------------|------------|
| H | 2.7096987  | 5.5979603  | -1.4622406 |
| H | 2.3632697  | 5.8011813  | 0.2736834  |
| H | 1.1270287  | 6.1995833  | -0.9261276 |
| H | 3.2915367  | 3.7579353  | 0.2456494  |
| H | 3.6123337  | -2.6240077 | 4.1481194  |
| H | 1.2254767  | -2.0743977 | 0.2971324  |
| H | 2.6830687  | -3.0588547 | 2.0624704  |
| H | 2.8325207  | 0.7493023  | 4.0759424  |
| H | 1.3774087  | 1.7825163  | 2.3244044  |
| H | 1.4949057  | 1.3346353  | -1.8256136 |
| H | 4.0905937  | -0.7503437 | 0.2919994  |
| H | 1.2820807  | -0.8665717 | -2.8073516 |
| H | 4.8219797  | -3.7144127 | 0.1032704  |
| H | 1.6524007  | -3.5199847 | -3.7835986 |
| H | 2.8678717  | -5.6167037 | -3.2267146 |
| H | 4.4268537  | -5.7102887 | -1.3211186 |
| C | -0.7943133 | -1.0554107 | 2.8812514  |
| C | 0.3036217  | 3.9855923  | 0.4265894  |
| C | 0.8419227  | 3.7127713  | -2.0128396 |
| C | 1.9360887  | 5.5000993  | -0.6918176 |
| C | 1.3958517  | 4.0723773  | -0.6374686 |
| N | 2.5667637  | 3.2433433  | -0.2456526 |
| O | 3.9735647  | 1.5522783  | 0.2013454  |
| C | 2.9171367  | 1.9325383  | -0.2865356 |
| O | 3.4064627  | -1.6838587 | 4.2415934  |
| C | 1.7348147  | -1.4200907 | 1.0072994  |
| C | 2.3829837  | -2.0128397 | 2.1112184  |

|    |            |            |            |
|----|------------|------------|------------|
| C  | 2.7456207  | -1.2277177 | 3.1842194  |
| C  | 2.4263187  | 0.1791723  | 3.2455454  |
| C  | 1.6498077  | 0.7287543  | 2.2984634  |
| C  | 1.0408767  | -0.0890537 | 1.2130154  |
| C  | -0.4463183 | -0.4503957 | 1.5701204  |
| C  | -1.2643263 | -0.1692197 | 0.5380954  |
| O  | -0.7116223 | 0.5992033  | -1.7172016 |
| C  | -0.4342423 | 0.3875903  | -0.5473666 |
| N  | 0.8399557  | 0.6460843  | -0.0183526 |
| C  | 1.9531997  | 0.9253213  | -0.9188406 |
| C  | 3.3812737  | -1.1847907 | -0.4001876 |
| C  | 2.5640187  | -0.3956517 | -1.2265776 |
| N  | 2.0414677  | -1.1667877 | -2.2054816 |
| C  | 4.1219297  | -3.6717777 | -0.7285656 |
| C  | 3.4408727  | -2.4898607 | -1.0248226 |
| C  | 2.5629237  | -2.4597947 | -2.1261526 |
| C  | 2.3318377  | -3.5642907 | -2.9364316 |
| C  | 3.0162777  | -4.7295407 | -2.6170586 |
| C  | 3.9010607  | -4.7827017 | -1.5310446 |
| Au | -3.2881143 | -0.4290807 | 0.2682514  |
| C  | -7.3128673 | -0.6261507 | -1.1661276 |
| C  | -7.5300953 | -1.0652787 | 0.0956754  |
| H  | -7.9919043 | -0.4711957 | -1.9923136 |
| H  | -8.4372133 | -1.3718197 | 0.5964954  |
| C  | -5.3235483 | -0.6459007 | -0.1048946 |
| N  | -6.3012083 | -1.0707077 | 0.7288424  |
| N  | -5.9576733 | -0.3748977 | -1.2698456 |

|   |            |            |            |
|---|------------|------------|------------|
| C | -6.1035443 | -1.4747367 | 2.1095434  |
| H | -5.0377223 | -1.4071687 | 2.3405694  |
| H | -6.6601733 | -0.8144217 | 2.7808494  |
| H | -6.4390953 | -2.5059147 | 2.2525914  |
| C | -5.3151033 | 0.1188393  | -2.4769056 |
| H | -5.7233243 | 1.0969263  | -2.7471196 |
| H | -4.2422753 | 0.2162193  | -2.2902436 |
| H | -5.4753013 | -0.5822627 | -3.3009896 |

Zero-point correction= 0.578740 (Hartree/Particle)

Thermal correction to Energy= 0.615499

Thermal correction to Enthalpy= 0.616443

Thermal correction to Gibbs Free Energy= 0.506455

Sum of electronic and zero-point Energies= -1757.949440

Sum of electronic and thermal Energies= -1757.912681

Sum of electronic and thermal Enthalpies= -1757.911736

Sum of electronic and thermal Free Energies= -1758.021724

### **B-int2**

|   |            |            |            |
|---|------------|------------|------------|
| H | -0.5112259 | -2.5976267 | 2.3890553  |
| H | -0.5344359 | -1.1566927 | 3.4008263  |
| H | -2.0102519 | -1.6564427 | 2.5378873  |
| H | -0.9590359 | 4.2383593  | 1.0765343  |
| H | -0.3582949 | 2.5751923  | 0.9900153  |
| H | 0.3627621  | 3.7300443  | 2.1412403  |
| H | 1.1115931  | 4.2259493  | -2.0790887 |
| H | -0.0970599 | 3.0157853  | -1.5453827 |
| H | -0.4480459 | 4.7307763  | -1.4128887 |
| H | 2.0470171  | 5.8945473  | -0.3930727 |

|   |            |            |            |
|---|------------|------------|------------|
| H | 1.7986401  | 5.6262393  | 1.3529343  |
| H | 0.4535211  | 6.1637733  | 0.3375063  |
| H | 3.0035101  | 3.8428933  | 0.5639803  |
| H | 3.0370121  | -3.2251277 | 3.9713733  |
| H | 1.2012111  | -2.1307167 | -0.0750937 |
| H | 2.3981081  | -3.3957087 | 1.6902573  |
| H | 2.5769911  | 0.2076063  | 4.0340933  |
| H | 1.2572811  | 1.4549663  | 2.3384933  |
| H | 1.2903601  | 1.4682293  | -1.8460767 |
| H | 3.7088371  | -0.4829347 | 0.5691863  |
| H | 2.6441041  | -0.1430707 | -3.2655797 |
| H | 4.6048871  | -3.4735807 | 0.4996163  |
| H | 3.9757211  | -2.3646937 | -4.3494827 |
| H | 5.1964451  | -4.4271077 | -3.6575007 |
| H | 5.5049161  | -4.9625927 | -1.2738127 |
| C | -0.9204339 | -1.5816097 | 2.4658983  |
| C | -0.0566629 | 3.6183963  | 1.1333253  |
| C | 0.3536121  | 3.9889033  | -1.3219387 |
| C | 1.3414931  | 5.5240163  | 0.3602433  |
| C | 0.9469361  | 4.0759353  | 0.0797223  |
| N | 2.2239761  | 3.3115453  | 0.1869003  |
| O | 3.8824091  | 1.8562623  | -0.2888047 |
| C | 2.6857201  | 2.1461623  | -0.3074257 |
| O | 2.8950081  | -2.2813437 | 4.1129033  |
| C | 1.7835921  | -1.5192257 | 0.6313033  |
| C | 2.2141451  | -2.3296637 | 1.8133753  |
| C | 2.4460391  | -1.7024567 | 2.9840913  |

|    |            |            |            |
|----|------------|------------|------------|
| C  | 2.1973011  | -0.2704627 | 3.1345213  |
| C  | 1.4891301  | 0.3990263  | 2.2163813  |
| C  | 0.8953991  | -0.3110557 | 1.0291103  |
| C  | -0.5575039 | -0.7556647 | 1.2845103  |
| C  | -1.3938749 | -0.3406197 | 0.3086003  |
| O  | -0.8907369 | 0.8772443  | -1.7534137 |
| C  | -0.5945279 | 0.4196893  | -0.6622617 |
| N  | 0.6971041  | 0.5734663  | -0.1169577 |
| C  | 1.7658061  | 1.0910293  | -0.9262467 |
| C  | 3.0701181  | -1.0171107 | -0.1464627 |
| C  | 2.6399901  | -0.0833637 | -1.2127207 |
| N  | 2.9048011  | -0.5849027 | -2.3886547 |
| C  | 4.4499971  | -3.2370637 | -0.5498847 |
| C  | 3.7603121  | -2.0949607 | -0.9255167 |
| C  | 3.6138491  | -1.8149737 | -2.2856157 |
| C  | 4.1052231  | -2.6146047 | -3.2999227 |
| C  | 4.7864721  | -3.7629087 | -2.9021297 |
| C  | 4.9580081  | -4.0655547 | -1.5509677 |
| Au | -3.4061449 | -0.6239137 | -0.0074167 |
| C  | -7.4378719 | -0.7273027 | -1.4430137 |
| C  | -7.6283039 | -1.3727637 | -0.2687197 |
| H  | -8.1294869 | -0.4637757 | -2.2303657 |
| H  | -8.5199169 | -1.7875727 | 0.1792063  |
| C  | -5.4381969 | -0.8488717 | -0.4060027 |
| N  | -6.3938519 | -1.4373537 | 0.3507953  |
| N  | -6.0929039 | -0.4148637 | -1.5089757 |
| C  | -6.1679189 | -2.0544717 | 1.6454963  |



|   |            |            |            |
|---|------------|------------|------------|
| H | -5.1060569 | -1.9680637 | 1.8885843  |
| H | -6.7561659 | -1.5461467 | 2.4150213  |
| H | -6.4461619 | -3.1119197 | 1.6141853  |
| C | -5.4771839 | 0.2878673  | -2.6224237 |
| H | -5.9384599 | 1.2718373  | -2.7468407 |
| H | -4.4116609 | 0.4139843  | -2.4123437 |
| H | -5.5969819 | -0.2888637 | -3.5441697 |

Zero-point correction= 0.580414 (Hartree/Particle)

Thermal correction to Energy= 0.617197

Thermal correction to Enthalpy= 0.618142

Thermal correction to Gibbs Free Energy= 0.508555

Sum of electronic and zero-point Energies= -1757.963108

Sum of electronic and thermal Energies= -1757.926325

Sum of electronic and thermal Enthalpies= -1757.925381

Sum of electronic and thermal Free Energies= -1758.034967

### **B-ts3**

|   |            |            |            |
|---|------------|------------|------------|
| H | -2.0757231 | -1.4505159 | 2.9660086  |
| H | -0.3887301 | -1.9556049 | 3.2135116  |
| H | -0.9124591 | -0.3650019 | 3.7512666  |
| H | -0.4999941 | 4.6311551  | -0.1447434 |
| H | -0.1963111 | 2.9395821  | 0.2892726  |
| H | 0.6432869  | 4.2507641  | 1.1585586  |
| H | 1.7119799  | 3.2993291  | -2.9117524 |
| H | 0.2073389  | 2.6291691  | -2.1925814 |
| H | 0.3024029  | 4.3268641  | -2.6246394 |
| H | 2.8546939  | 5.2803651  | -1.6801924 |
| H | 2.4532239  | 5.5930281  | 0.0281326  |

|   |            |            |            |
|---|------------|------------|------------|
| H | 1.2966249  | 6.0101531  | -1.2424904 |
| H | 3.2571749  | 3.4906181  | 0.1131786  |
| H | 4.8002469  | -1.0585389 | 3.6518376  |
| H | 1.0117209  | -2.3240949 | 1.4900306  |
| H | 3.4394859  | -2.3368139 | 2.2484756  |
| H | 2.5614339  | 1.5706101  | 3.7926406  |
| H | 0.5497109  | 1.7487421  | 2.3629056  |
| H | 1.2619519  | 1.0366991  | -1.8350744 |
| H | 3.3746609  | -1.1061569 | 0.7370776  |
| H | 3.1811119  | -0.5776109 | -2.9918914 |
| H | 2.8188039  | -4.4267969 | 0.7795046  |
| H | 4.3360289  | -3.0246469 | -3.7950554 |
| H | 4.7298569  | -5.3358549 | -2.9668494 |
| H | 3.9730469  | -6.0236689 | -0.7253544 |
| C | -1.0369821 | -1.1072249 | 2.9504996  |
| C | 0.2725169  | 3.9237291  | 0.1789156  |
| C | 0.8834829  | 3.4912031  | -2.2183394 |
| C | 2.0462409  | 5.2719961  | -0.9397454 |
| C | 1.4068109  | 3.8888101  | -0.8412404 |
| N | 2.5049939  | 3.0033871  | -0.3648124 |
| O | 3.7667339  | 1.2180311  | 0.1716536  |
| C | 2.7434979  | 1.6747711  | -0.3314544 |
| O | 4.2410429  | -0.2763489 | 3.7556036  |
| C | 1.6389369  | -1.4511229 | 1.2661446  |
| C | 2.8969329  | -1.3957589 | 2.1323776  |
| C | 3.1556999  | -0.3566649 | 2.9978506  |
| C | 2.2816689  | 0.7866221  | 3.0945036  |

|    |            |            |            |
|----|------------|------------|------------|
| C  | 1.1964039  | 0.8720551  | 2.3162906  |
| C  | 0.7468169  | -0.1584229 | 1.3169656  |
| C  | -0.7055491 | -0.5295319 | 1.6207936  |
| C  | -1.5341251 | -0.2396199 | 0.5990866  |
| O  | -1.0198901 | 0.6954031  | -1.6021064 |
| C  | -0.7105411 | 0.3547231  | -0.4739904 |
| N  | 0.5994289  | 0.5041901  | 0.0219366  |
| C  | 1.7035099  | 0.6885951  | -0.8928934 |
| C  | 2.3614539  | -1.6093429 | -0.0602054 |
| C  | 2.3469449  | -0.6400799 | -1.0776914 |
| N  | 2.9756719  | -1.1144919 | -2.1593264 |
| C  | 3.1547389  | -4.1106459 | -0.2065234 |
| C  | 2.9313289  | -2.8129569 | -0.6601304 |
| C  | 3.3541289  | -2.4480919 | -1.9510554 |
| C  | 4.0103199  | -3.3257229 | -2.8027794 |
| C  | 4.2254539  | -4.6141459 | -2.3304664 |
| C  | 3.7988209  | -5.0028539 | -1.0544344 |
| Au | -3.5493821 | -0.4960979 | 0.2895746  |
| C  | -7.5028641 | -0.6157709 | -1.3309354 |
| C  | -7.7865021 | -1.1085559 | -0.1026924 |
| H  | -8.1379491 | -0.4207909 | -2.1832014 |
| H  | -8.7192791 | -1.4314759 | 0.3369606  |
| C  | -5.5704231 | -0.6927569 | -0.1703904 |
| N  | -6.5915761 | -1.1480889 | 0.5921396  |
| N  | -6.1433491 | -0.3674829 | -1.3535834 |
| C  | -6.4632371 | -1.6165379 | 1.9601576  |
| H  | -5.4130811 | -1.5427369 | 2.2524756  |

|   |            |            |            |
|---|------------|------------|------------|
| H | -7.0683311 | -0.9990669 | 2.6304106  |
| H | -6.7865091 | -2.6588959 | 2.0350766  |
| C | -5.4368501 | 0.1716541  | -2.5045454 |
| H | -5.8426351 | 1.1527001  | -2.7678154 |
| H | -4.3777901 | 0.2764151  | -2.2527114 |
| H | -5.5383041 | -0.5047769 | -3.3581234 |

Zero-point correction= 0.574830 (Hartree/Particle)

Thermal correction to Energy= 0.611635

Thermal correction to Enthalpy= 0.612580

Thermal correction to Gibbs Free Energy= 0.502338

Sum of electronic and zero-point Energies= -1757.916204

Sum of electronic and thermal Energies= -1757.879399

Sum of electronic and thermal Enthalpies= -1757.878454

Sum of electronic and thermal Free Energies= -1757.988696

### **B-int3**

|   |            |            |            |
|---|------------|------------|------------|
| H | -1.2847439 | -3.8709997 | 0.1364262  |
| H | -1.1145339 | -3.5495387 | 1.8709532  |
| H | -2.6556179 | -3.2361537 | 1.0507042  |
| H | 0.2872521  | 5.1380823  | -0.1080398 |
| H | -0.0701209 | 3.4030753  | -0.0292978 |
| H | 0.0308851  | 4.3535493  | 1.4605952  |
| H | 3.7163111  | 3.7265953  | -0.6826198 |
| H | 2.2153981  | 3.0797433  | -1.4177488 |
| H | 2.4878901  | 4.8131853  | -1.3389708 |
| H | 3.6915701  | 4.9955333  | 1.4495462  |
| H | 2.1612561  | 5.2650423  | 2.3256282  |
| H | 2.4541361  | 6.0760753  | 0.7814602  |

|   |            |            |            |
|---|------------|------------|------------|
| H | 2.6120341  | 2.9884203  | 2.3475912  |
| H | 0.6582381  | -2.4404707 | -1.1557558 |
| H | 0.8949871  | -4.1742327 | 0.4431742  |
| H | 1.8356911  | -2.2001287 | 3.6960552  |
| H | 0.1479651  | -0.6647737 | 2.7220822  |
| H | 0.9914471  | 1.6863633  | -0.6557308 |
| H | 3.8877821  | 1.5541543  | -0.9756268 |
| H | 3.6344571  | -3.7795347 | -1.8002988 |
| H | 6.2030921  | 0.5062213  | -2.1623998 |
| H | 7.1590141  | -1.6376137 | -2.9768028 |
| H | 5.8732181  | -3.7394047 | -2.7987558 |
| C | -1.5681989 | -3.1771027 | 0.9420912  |
| C | 0.4682411  | 4.2204573  | 0.4642312  |
| C | 2.6331231  | 3.8756433  | -0.7907178 |
| C | 2.6108561  | 5.1432673  | 1.3324432  |
| C | 1.9700001  | 3.9803723  | 0.5800402  |
| N | 2.2530431  | 2.7807473  | 1.4201732  |
| O | 1.9350321  | 0.7521753  | 2.3351202  |
| C | 1.8284571  | 1.5009103  | 1.3630652  |
| O | 2.9788201  | -4.1273227 | 2.2643752  |
| C | 1.2429511  | -2.1416997 | -0.2715568 |
| C | 1.7092751  | -3.4331407 | 0.4209162  |
| C | 2.1221731  | -3.2385057 | 1.8290902  |
| C | 1.5735871  | -2.2574777 | 2.6412592  |
| C | 0.6986691  | -1.3506137 | 2.0851372  |
| C | 0.2993241  | -1.3360817 | 0.6504292  |
| C | -1.1730269 | -1.7768147 | 0.6233102  |

|    |            |            |            |
|----|------------|------------|------------|
| C  | -1.9783269 | -0.7580717 | 0.2567382  |
| O  | -1.4400789 | 1.5497883  | -0.3525778 |
| C  | -1.1253479 | 0.4287163  | 0.0047242  |
| N  | 0.1930561  | 0.0435763  | 0.2371892  |
| C  | 1.3264541  | 0.9042893  | 0.0369432  |
| C  | 2.4006831  | -1.2847627 | -0.6938528 |
| C  | 2.4272081  | 0.0753683  | -0.5396978 |
| N  | 3.6219251  | 0.5808743  | -0.9875608 |
| C  | 4.1892851  | -2.8434647 | -1.8300588 |
| C  | 3.6387431  | -1.6507037 | -1.3332918 |
| C  | 4.3844721  | -0.4561057 | -1.4835098 |
| C  | 5.6512301  | -0.4256007 | -2.0629368 |
| C  | 6.1742261  | -1.6236677 | -2.5173798 |
| C  | 5.4453211  | -2.8191157 | -2.4097998 |
| Au | -4.0004989 | -0.5973717 | -0.0689358 |
| C  | -7.9176529 | 0.8105893  | -1.0259268 |
| C  | -8.2523819 | -0.4558037 | -0.6842428 |
| H  | -8.5230739 | 1.6403723  | -1.3615048 |
| H  | -9.2090559 | -0.9576497 | -0.6603608 |
| C  | -6.0192149 | -0.2566727 | -0.4433208 |
| N  | -7.0772269 | -1.0926867 | -0.3307718 |
| N  | -6.5482119 | 0.9135363  | -0.8721058 |
| C  | -7.0026599 | -2.4762977 | 0.1021082  |
| H  | -5.9575599 | -2.7159127 | 0.3118042  |
| H  | -7.5955009 | -2.6214717 | 1.0098862  |
| H  | -7.3739189 | -3.1394177 | -0.6846538 |
| C  | -5.7908899 | 2.1257363  | -1.1426558 |

|   |            |            |            |
|---|------------|------------|------------|
| H | -6.1447199 | 2.9388233  | -0.5023748 |
| H | -4.7337049 | 1.9384593  | -0.9345218 |
| H | -5.9049899 | 2.4125763  | -2.1919338 |
| H | 2.5366111  | -3.9080857 | -0.1145708 |
| H | 3.2058661  | -3.9878467 | 3.1975772  |

Zero-point correction= 0.581257 (Hartree/Particle)

Thermal correction to Energy= 0.618164

Thermal correction to Enthalpy= 0.619109

Thermal correction to Gibbs Free Energy= 0.508288

Sum of electronic and zero-point Energies= -1757.979505

Sum of electronic and thermal Energies= -1757.942597

Sum of electronic and thermal Enthalpies= -1757.941653

Sum of electronic and thermal Free Energies= -1758.052474

#### **B-ts4**

|   |            |            |            |
|---|------------|------------|------------|
| H | -1.0471707 | -3.6662399 | 1.1780730  |
| H | -1.6043007 | -2.8852179 | 2.6623730  |
| H | -2.6740737 | -2.9696159 | 1.2614670  |
| H | 1.1543453  | 5.1868321  | 0.3142390  |
| H | 0.5388103  | 3.5315991  | 0.3848910  |
| H | 1.0394513  | 4.3563921  | 1.8755520  |
| H | 4.1096243  | 3.1734321  | -0.9121680 |
| H | 2.3880733  | 3.0227941  | -1.3965400 |
| H | 3.1318553  | 4.6069741  | -1.2768100 |
| H | 4.7082403  | 4.4294071  | 1.2149690  |
| H | 3.4282783  | 4.8614011  | 2.3800840  |
| H | 3.5565103  | 5.7252831  | 0.8426110  |
| H | 3.4842053  | 2.5501991  | 2.2468400  |

|   |            |            |            |
|---|------------|------------|------------|
| H | 0.6507343  | -2.8742549 | -0.1023760 |
| H | 2.6242293  | -3.8143829 | 0.7908760  |
| H | 1.6242753  | -1.7473649 | 4.2861980  |
| H | 0.1480463  | -0.0674479 | 3.0365300  |
| H | 1.1298023  | 1.7740191  | -0.4520140 |
| H | 3.3745953  | 1.1962281  | -2.0549490 |
| H | 2.7047373  | -4.1444429 | -1.6543840 |
| H | 4.9722013  | -0.2560979 | -3.8711620 |
| H | 5.4264013  | -2.5862879 | -4.5936000 |
| H | 4.3113633  | -4.4958849 | -3.4983800 |
| C | -1.6334777 | -2.8213549 | 1.5649640  |
| C | 1.2779173  | 4.2192241  | 0.8146060  |
| C | 3.1085173  | 3.6125801  | -0.8174020 |
| C | 3.6621583  | 4.7435941  | 1.3147470  |
| C | 2.7195303  | 3.7426451  | 0.6531320  |
| N | 2.9365043  | 2.4676321  | 1.3951470  |
| O | 2.4596653  | 0.4352171  | 2.2303490  |
| C | 2.3205503  | 1.2769701  | 1.3307010  |
| O | 1.1330393  | -4.1595609 | 3.0156690  |
| C | 1.2871653  | -2.1056339 | 0.3591310  |
| C | 2.3129563  | -2.8881499 | 1.2800950  |
| C | 1.6342053  | -3.1069259 | 2.5515180  |
| C | 1.1291463  | -1.9776479 | 3.3403480  |
| C | 0.5897663  | -0.9485569 | 2.5740180  |
| C | 0.3345793  | -1.1047269 | 1.1196110  |
| C | -1.1611787 | -1.5052429 | 1.0555700  |
| C | -1.8976917 | -0.5217019 | 0.4963980  |



|    |            |            |            |
|----|------------|------------|------------|
| O  | -1.2259437 | 1.6555911  | -0.3997280 |
| C  | -0.9841407 | 0.5919311  | 0.1400680  |
| N  | 0.2963333  | 0.2166311  | 0.5442130  |
| C  | 1.4829983  | 0.9000881  | 0.1059070  |
| C  | 2.0848873  | -1.4089229 | -0.6900620 |
| C  | 2.2417863  | -0.0529619 | -0.7609210 |
| N  | 3.1531793  | 0.2647431  | -1.7379420 |
| C  | 3.2012943  | -3.2929249 | -2.1180830 |
| C  | 2.9333133  | -1.9843189 | -1.6937520 |
| C  | 3.5842373  | -0.9054749 | -2.3367040 |
| C  | 4.4833093  | -1.0962739 | -3.3836800 |
| C  | 4.7298013  | -2.4001389 | -3.7804070 |
| C  | 4.0957553  | -3.4873249 | -3.1556390 |
| Au | -3.8837957 | -0.3530089 | -0.0025050 |
| C  | -7.6660057 | 0.9877171  | -1.4621030 |
| C  | -8.0736517 | -0.1925579 | -0.9393040 |
| H  | -8.2137847 | 1.7660251  | -1.9738270 |
| H  | -9.0494237 | -0.6552029 | -0.9009290 |
| C  | -5.8556037 | -0.0200329 | -0.5747170 |
| N  | -6.9514887 | -0.7942639 | -0.4009070 |
| N  | -6.3067587 | 1.0757581  | -1.2292710 |
| C  | -6.9628437 | -2.0867789 | 0.2603890  |
| H  | -5.9452227 | -2.3181329 | 0.5835510  |
| H  | -7.6211277 | -2.0592899 | 1.1335570  |
| H  | -7.3068887 | -2.8619249 | -0.4304230 |
| C  | -5.4848337 | 2.2021881  | -1.6438730 |
| H  | -5.8529477 | 3.1232431  | -1.1831050 |

|   |            |            |            |
|---|------------|------------|------------|
| H | -4.4538967 | 2.0274091  | -1.3236340 |
| H | -5.5103047 | 2.3043031  | -2.7325410 |
| H | 3.1766463  | -2.2331799 | 1.4450800  |
| H | 0.4915363  | -3.1785979 | 3.7003710  |

Zero-point correction= 0.574096 (Hartree/Particle)

Thermal correction to Energy= 0.610050

Thermal correction to Enthalpy= 0.610995

Thermal correction to Gibbs Free Energy= 0.503672

Sum of electronic and zero-point Energies= -1757.891186

Sum of electronic and thermal Energies= -1757.855232

Sum of electronic and thermal Enthalpies= -1757.854287

Sum of electronic and thermal Free Energies= -1757.961610

#### **B-int4**

|   |            |            |            |
|---|------------|------------|------------|
| H | -0.9416728 | -2.8621608 | -2.1758529 |
| H | -0.7529618 | -4.0528338 | -0.8823089 |
| H | -2.2932108 | -3.2136608 | -1.0893319 |
| H | 1.7202272  | -1.3515708 | -1.8217849 |
| H | 1.3083092  | -3.7074118 | -1.5648269 |
| H | -0.0427968 | -4.4387438 | 1.0130321  |
| H | -0.1757048 | -1.7893028 | 2.0077831  |
| H | 4.0177202  | 1.3211562  | 1.8114641  |
| H | 4.9028762  | -2.8760908 | -1.4968309 |
| H | 6.7483282  | 0.5860302  | 1.6192601  |
| H | 8.2446502  | -0.9979938 | 0.4202591  |
| H | 7.3106582  | -2.6970418 | -1.1107549 |
| C | -1.2059878 | -3.0910438 | -1.1369419 |
| O | 2.7831112  | -4.7348068 | 0.8526561  |

|    |            |            |            |
|----|------------|------------|------------|
| C  | 1.8501572  | -1.7470668 | -0.8013259 |
| C  | 2.0574102  | -3.2641998 | -0.8940909 |
| C  | 1.9599172  | -3.9575328 | 0.4423341  |
| C  | 0.7024022  | -3.6705818 | 1.2686681  |
| C  | 0.1760422  | -2.2817788 | 1.1007601  |
| C  | 0.6077372  | -1.4108368 | 0.0038121  |
| C  | -0.8020618 | -1.9598368 | -0.2347469 |
| C  | -1.7072908 | -0.9403618 | 0.1185001  |
| O  | -1.3504298 | 1.2193772  | 1.1706581  |
| C  | -0.9077838 | 0.2367112  | 0.6100701  |
| N  | 0.4218792  | -0.0124708 | 0.3297661  |
| C  | 1.4678542  | 0.6733852  | 1.0816361  |
| C  | 2.9789112  | -1.0435198 | -0.0928939 |
| C  | 2.7642802  | 0.0166062  | 0.7534691  |
| N  | 3.9453382  | 0.4711022  | 1.2651101  |
| C  | 5.2740262  | -2.1275588 | -0.8011569 |
| C  | 4.4059252  | -1.2524358 | -0.1283909 |
| C  | 4.9726122  | -0.2804318 | 0.7349031  |
| C  | 6.3449652  | -0.1700698 | 0.9501971  |
| C  | 7.1687442  | -1.0543378 | 0.2776621  |
| C  | 6.6368152  | -2.0209268 | -0.5911969 |
| Au | -3.7264418 | -0.7579948 | 0.1042351  |
| C  | -7.7059438 | 0.6333272  | 0.6955681  |
| C  | -8.0075078 | -0.5371638 | 0.0817751  |
| H  | -8.3416658 | 1.4170092  | 1.0823231  |
| H  | -8.9587628 | -0.9804878 | -0.1758809 |
| C  | -5.7676768 | -0.4001998 | 0.2180321  |

|   |            |            |            |
|---|------------|------------|------------|
| N | -6.8072288 | -1.1555168 | -0.2021699 |
| N | -6.3304098 | 0.6996862  | 0.7698141  |
| C | -6.6980738 | -2.4448028 | -0.8650239 |
| H | -5.6403288 | -2.6976228 | -0.9660949 |
| H | -7.1975738 | -3.2157358 | -0.2719699 |
| H | -7.1528478 | -2.3964978 | -1.8581869 |
| C | -5.6061568 | 1.8130312  | 1.3692281  |
| H | -5.8853058 | 1.9150312  | 2.4213301  |
| H | -4.5314428 | 1.6239192  | 1.3012051  |
| H | -5.8417728 | 2.7389012  | 0.8377401  |
| H | 3.0356722  | -3.4978268 | -1.3176479 |
| H | 0.9444832  | -3.8436908 | 2.3230171  |
| C | 1.6057522  | 2.1805322  | 0.8004001  |
| O | 2.2418882  | 2.8293302  | 1.6195891  |
| N | 1.0886692  | 2.6326102  | -0.3517109 |
| H | 0.5768002  | 1.9698992  | -0.9186829 |
| C | 1.0296082  | 4.0602962  | -0.7480759 |
| C | 2.4405832  | 4.6152742  | -0.9013829 |
| C | 0.3038872  | 4.0963322  | -2.0856209 |
| C | 0.2401952  | 4.8366722  | 0.3005641  |
| H | 2.9835172  | 4.5674472  | 0.0465181  |
| H | 2.9987932  | 4.0503012  | -1.6571989 |
| H | 2.3917512  | 5.6622232  | -1.2230709 |
| H | -0.7163778 | 3.6998012  | -1.9937549 |
| H | 0.2289572  | 5.1288852  | -2.4420769 |
| H | 0.8437112  | 3.5175332  | -2.8460499 |
| H | 0.1228332  | 5.8797432  | -0.0158599 |

|   |            |           |           |
|---|------------|-----------|-----------|
| H | -0.7557428 | 4.3950132 | 0.4312151 |
| H | 0.7553182  | 4.8232302 | 1.2655461 |
| H | 1.2478422  | 0.6237502 | 2.1627911 |

Zero-point correction= 0.582175 (Hartree/Particle)

Thermal correction to Energy= 0.618435

Thermal correction to Enthalpy= 0.619379

Thermal correction to Gibbs Free Energy= 0.510218

Sum of electronic and zero-point Energies= -1757.982274

Sum of electronic and thermal Energies= -1757.946014

Sum of electronic and thermal Enthalpies= -1757.945070

Sum of electronic and thermal Free Energies= -1758.054231

#### **B-ts5**

|   |            |            |            |
|---|------------|------------|------------|
| H | -1.2123357 | -3.9020631 | 0.4248279  |
| H | -1.2683647 | -3.4942601 | 2.1445729  |
| H | -2.6952677 | -3.2392371 | 1.1255399  |
| H | 0.3030033  | 5.0797209  | -0.0830621 |
| H | -0.0382727 | 3.3501839  | 0.0878379  |
| H | 0.2180383  | 4.3517039  | 1.5299849  |
| H | 3.6496573  | 3.6193959  | -0.9740141 |
| H | 2.0752113  | 2.9523859  | -1.5112601 |
| H | 2.3603953  | 4.6850459  | -1.5424751 |
| H | 3.8561793  | 4.9969229  | 1.0842499  |
| H | 2.4319913  | 5.3035899  | 2.1149499  |
| H | 2.5473963  | 6.0472819  | 0.5148889  |
| H | 2.9450093  | 3.0230559  | 2.1572799  |
| H | 0.6251293  | -2.6685861 | -0.8096641 |
| H | 1.0068243  | -4.0739801 | 1.1503879  |

|   |            |            |            |
|---|------------|------------|------------|
| H | 1.9986783  | -1.8650571 | 3.9144929  |
| H | 0.0083873  | -0.7001361 | 2.9265889  |
| H | 0.9812473  | 1.5972529  | -0.5427781 |
| H | 3.7826593  | 1.3899919  | -1.2586321 |
| H | 3.4080743  | -3.9834731 | -1.6501791 |
| H | 5.9274153  | 0.2324909  | -2.6539031 |
| H | 6.7562523  | -1.9754981 | -3.4321531 |
| H | 5.5013003  | -4.0432991 | -2.9369221 |
| C | -1.6032477 | -3.1726841 | 1.1483179  |
| C | 0.5453973  | 4.1821789  | 0.4977439  |
| C | 2.5620113  | 3.7724369  | -0.9709141 |
| C | 2.7684223  | 5.1390239  | 1.0840219  |
| C | 2.0506753  | 3.9478509  | 0.4559409  |
| N | 2.4267893  | 2.7837529  | 1.3156819  |
| O | 2.3968313  | 0.7927479  | 2.3183709  |
| C | 2.0733883  | 1.4935999  | 1.3393059  |
| O | 3.5487853  | -3.4544601 | 2.4860789  |
| C | 1.2394803  | -2.2395001 | -0.0024081 |
| C | 1.8168273  | -3.4076841 | 0.8144249  |
| C | 2.5382953  | -2.9595141 | 2.0574909  |
| C | 1.8228933  | -1.8746501 | 2.8368609  |
| C | 0.6479873  | -1.3433961 | 2.3167419  |
| C | 0.2974843  | -1.3762121 | 0.8760909  |
| C | -1.1837627 | -1.7827091 | 0.8144649  |
| C | -1.9570377 | -0.7527441 | 0.4164629  |
| O | -1.3490427 | 1.5178799  | -0.2470451 |
| C | -1.0783497 | 0.4121629  | 0.1769059  |

|    |            |            |            |
|----|------------|------------|------------|
| N  | 0.2372593  | 0.0305309  | 0.5130689  |
| C  | 1.3836503  | 0.8361439  | 0.1379439  |
| C  | 2.3296433  | -1.4057691 | -0.6038891 |
| C  | 2.3839083  | -0.0418221 | -0.5366971 |
| N  | 3.5169713  | 0.4218279  | -1.1604601 |
| C  | 3.9542223  | -3.0605751 | -1.8341941 |
| C  | 3.4784813  | -1.8271511 | -1.3636911 |
| C  | 4.2037543  | -0.6558741 | -1.6846131 |
| C  | 5.3855833  | -0.6814211 | -2.4222551 |
| C  | 5.8377603  | -1.9158841 | -2.8543491 |
| C  | 5.1254733  | -3.0924261 | -2.5688601 |
| Au | -3.9679277 | -0.5887191 | 0.0137879  |
| C  | -7.8666517 | 0.7322599  | -1.1243501 |
| C  | -8.1953017 | -0.5217021 | -0.7343061 |
| H  | -8.4721797 | 1.5370359  | -1.5159421 |
| H  | -9.1458337 | -1.0352921 | -0.7154281 |
| C  | -5.9739527 | -0.2802331 | -0.4371781 |
| N  | -7.0237097 | -1.1252521 | -0.3170941 |
| N  | -6.5039697 | 0.8615039  | -0.9350381 |
| C  | -6.9467107 | -2.4871391 | 0.1808689  |
| H  | -7.2843377 | -3.1896981 | -0.5864401 |
| H  | -5.9065107 | -2.7039841 | 0.4349999  |
| H  | -7.5671287 | -2.5985391 | 1.0747579  |
| C  | -5.7547827 | 2.0702259  | -1.2401651 |
| H  | -6.1420247 | 2.9086429  | -0.6542491 |
| H  | -4.7034297 | 1.9093259  | -0.9862441 |
| H  | -5.8353887 | 2.3026909  | -2.3058571 |

|   |           |            |           |
|---|-----------|------------|-----------|
| H | 2.5048823 | -4.0147861 | 0.2212679 |
| H | 2.2158143 | -0.7454301 | 2.4895089 |

Zero-point correction= 0.574074 (Hartree/Particle)

Thermal correction to Energy= 0.610017

Thermal correction to Enthalpy= 0.610961

Thermal correction to Gibbs Free Energy= 0.502975

Sum of electronic and zero-point Energies= -1757.941827

Sum of electronic and thermal Energies= -1757.905884

Sum of electronic and thermal Enthalpies= -1757.904939

Sum of electronic and thermal Free Energies= -1758.012925

### **B-int5**

|   |            |            |            |
|---|------------|------------|------------|
| H | -1.3484778 | -3.8618750 | 0.1835637  |
| H | -1.1849718 | -3.5499780 | 1.9178157  |
| H | -2.7048548 | -3.1687330 | 1.0778037  |
| H | 0.1177222  | 5.1122360  | -0.1707113 |
| H | -0.1866508 | 3.3717570  | 0.0142977  |
| H | -0.0556148 | 4.4131890  | 1.4467677  |
| H | 3.5551512  | 3.7219760  | -0.8112193 |
| H | 2.0240642  | 3.0505350  | -1.4633863 |
| H | 2.3055062  | 4.7835880  | -1.4642013 |
| H | 3.5938132  | 5.1215680  | 1.2501317  |
| H | 2.0977442  | 5.3867940  | 2.1921847  |
| H | 2.2988182  | 6.1455940  | 0.6111837  |
| H | 2.6350672  | 3.1248270  | 2.2630397  |
| H | 0.6247242  | -2.3765000 | -1.1209403 |
| H | 0.7676722  | -4.1363520 | 0.5853737  |
| H | 2.0693372  | -2.4542380 | 3.6590887  |



|   |            |            |            |
|---|------------|------------|------------|
| H | 0.2580082  | -0.9264120 | 2.9201677  |
| H | 0.9787962  | 1.6008680  | -0.6036663 |
| H | 3.8741772  | 1.4862430  | -1.1096633 |
| H | 3.7255282  | -3.8837780 | -1.5744913 |
| H | 6.2306912  | 0.4185400  | -2.1277703 |
| H | 7.2069912  | -1.7455700 | -2.8646883 |
| H | 5.9525332  | -3.8544150 | -2.5785283 |
| C | -1.6140458 | -3.1584140 | 0.9856437  |
| C | 0.3415832  | 4.2315550  | 0.4416997  |
| C | 2.4695302  | 3.8678460  | -0.8864473 |
| C | 2.5049122  | 5.2370820  | 1.1847317  |
| C | 1.8501042  | 4.0460730  | 0.4938747  |
| N | 2.1875242  | 2.8698960  | 1.3828037  |
| O | 2.3901362  | 0.8982630  | 2.3166807  |
| C | 1.9776912  | 1.5847330  | 1.2897157  |
| O | 3.4029032  | -3.9626460 | 1.9693957  |
| C | 1.2331902  | -2.1798670 | -0.2237733 |
| C | 1.6564792  | -3.5268880 | 0.3751677  |
| C | 2.3986322  | -3.3519160 | 1.6756347  |
| C | 1.7512962  | -2.4033550 | 2.6188157  |
| C | 0.7863432  | -1.5659240 | 2.2078127  |
| C | 0.3313512  | -1.4055460 | 0.7776407  |
| C | -1.1509768 | -1.7764530 | 0.6821317  |
| C | -1.9241698 | -0.7337560 | 0.3151087  |
| O | -1.2801938 | 1.5333350  | -0.3245833 |
| C | -1.0355738 | 0.4178330  | 0.1035627  |
| N | 0.2671482  | 0.0296980  | 0.4720197  |

|    |            |            |            |
|----|------------|------------|------------|
| C  | 1.3825492  | 0.8525410  | 0.0933167  |
| C  | 2.4227382  | -1.3495850 | -0.6270103 |
| C  | 2.4589252  | 0.0112050  | -0.5024113 |
| N  | 3.6680652  | 0.5137840  | -0.9369953 |
| C  | 4.2502192  | -2.9380530 | -1.6704913 |
| C  | 3.6758362  | -1.7302270 | -1.2383703 |
| C  | 4.4196692  | -0.5395340 | -1.4206703 |
| C  | 5.6865532  | -0.5144950 | -2.0007103 |
| C  | 6.2207762  | -1.7225950 | -2.4087583 |
| C  | 5.5070072  | -2.9211830 | -2.2450943 |
| Au | -3.9458988 | -0.5761950 | -0.0298333 |
| C  | -7.9447248 | 0.5519580  | -1.0643713 |
| C  | -8.2016468 | -0.6921100 | -0.5974863 |
| H  | -8.6005998 | 1.3098360  | -1.4682593 |
| H  | -9.1274048 | -1.2425000 | -0.5096763 |
| C  | -5.9803018 | -0.3449560 | -0.4122863 |
| N  | -6.9879248 | -1.2243220 | -0.2034503 |
| N  | -6.5815228 | 0.7462240  | -0.9425783 |
| C  | -6.8312248 | -2.5539690 | 0.3586457  |
| H  | -5.7728898 | -2.7134730 | 0.5788507  |
| H  | -7.4093418 | -2.6446010 | 1.2828277  |
| H  | -7.1684008 | -3.3092940 | -0.3571143 |
| C  | -5.8974268 | 1.9645390  | -1.3422213 |
| H  | -6.3009248 | 2.8192660  | -0.7916713 |
| H  | -4.8330768 | 1.8597410  | -1.1155973 |
| H  | -6.0219868 | 2.1318740  | -2.4160323 |
| H  | 2.2781642  | -4.1038410 | -0.3111373 |

|   |           |            |           |
|---|-----------|------------|-----------|
| H | 2.2551552 | -0.0714510 | 2.2087977 |
|---|-----------|------------|-----------|

Zero-point correction= 0.580529 (Hartree/Particle)

Thermal correction to Energy= 0.617617

Thermal correction to Enthalpy= 0.618562

Thermal correction to Gibbs Free Energy= 0.506500

Sum of electronic and zero-point Energies= -1757.976959

Sum of electronic and thermal Energies= -1757.939871

Sum of electronic and thermal Enthalpies= -1757.938927

Sum of electronic and thermal Free Energies= -1758.050988

### **B-ts6**

|   |            |            |            |
|---|------------|------------|------------|
| H | -1.5836003 | -3.8265859 | -0.8194580 |
| H | -0.5131193 | -3.9870209 | 0.5894640  |
| H | -2.1865743 | -3.3622799 | 0.7632410  |
| H | 0.5287017  | 5.1938821  | -1.1066730 |
| H | 0.1992887  | 3.4668101  | -1.3501950 |
| H | -0.7271553 | 4.3781761  | -0.1545880 |
| H | 3.4380897  | 3.6608551  | 0.6951090  |
| H | 2.7874177  | 3.0839851  | -0.8798140 |
| H | 2.9683187  | 4.8016631  | -0.5634730 |
| H | 2.0056167  | 4.8554051  | 2.3413980  |
| H | 0.2978807  | 5.2045021  | 1.9636560  |
| H | 1.5850977  | 6.0172311  | 1.0682950  |
| H | 0.3005007  | 2.9470151  | 2.0403510  |
| H | 1.4467907  | -2.0537429 | -2.1809740 |
| H | 1.2035527  | -4.1739449 | -0.9811600 |
| H | 1.9769347  | -2.8156909 | 2.6827710  |
| H | 0.5608697  | -1.0032959 | 1.9275980  |

|   |            |            |            |
|---|------------|------------|------------|
| H | 1.2595697  | 1.6391801  | -1.2392760 |
| H | 3.8948697  | 1.7218331  | 0.3601950  |
| H | 4.7837467  | -3.3070269 | -1.3979300 |
| H | 6.5764237  | 1.0008091  | 0.4291020  |
| H | 8.0815827  | -0.9125179 | -0.0719500 |
| H | 7.1737207  | -3.0268489 | -0.9724560 |
| C | -1.2882733 | -3.3654379 | 0.1352060  |
| C | 0.2687357  | 4.2594741  | -0.5964530 |
| C | 2.7019827  | 3.8464201  | -0.0983500 |
| C | 1.2975237  | 5.0685621  | 1.5322540  |
| C | 1.3037397  | 3.9612231  | 0.4845040  |
| N | 0.8799267  | 2.7247411  | 1.2326140  |
| O | -0.3254293 | 0.8623791  | 1.4096790  |
| C | 0.5832247  | 1.5000631  | 0.7969110  |
| O | 3.0639057  | -4.5981419 | 1.1552370  |
| C | 1.7361147  | -2.0959789 | -1.1218480 |
| C | 2.0668237  | -3.5338479 | -0.7443300 |
| C | 2.3713057  | -3.6992599 | 0.7265900  |
| C | 1.7477497  | -2.7030559 | 1.6249440  |
| C | 0.9833837  | -1.6874839 | 1.1996140  |
| C | 0.5766977  | -1.5269769 | -0.2812730 |
| C | -0.8624823 | -1.9820789 | -0.1472480 |
| C | -1.7173883 | -0.8798419 | -0.1771250 |
| O | -1.3657383 | 1.1963421  | -1.4168270 |
| C | -0.9611433 | 0.1537861  | -0.9495690 |
| N | 0.3792047  | -0.1868759 | -0.8436170 |
| C | 1.2621367  | 0.8673161  | -0.4541240 |

|    |            |            |            |
|----|------------|------------|------------|
| C  | 2.8472247  | -1.0936639 | -0.8227570 |
| C  | 2.6094077  | 0.1971761  | -0.3831670 |
| N  | 3.7917897  | 0.7949311  | -0.0198330 |
| C  | 5.1442037  | -2.3645559 | -0.9962040 |
| C  | 4.2664317  | -1.2999389 | -0.7175530 |
| C  | 4.8204497  | -0.1005779 | -0.2069400 |
| C  | 6.1836417  | 0.0659991  | 0.0357480  |
| C  | 7.0127437  | -1.0027309 | -0.2466450 |
| C  | 6.4952217  | -2.2053029 | -0.7592730 |
| Au | -3.7864023 | -0.7628959 | -0.0662750 |
| C  | -7.8864783 | 0.2917521  | -0.5971240 |
| C  | -8.0648733 | -0.7473679 | 0.2519250  |
| H  | -8.5978863 | 0.9490061  | -1.0762930 |
| H  | -8.9632023 | -1.1816659 | 0.6667220  |
| C  | -5.8487863 | -0.5215419 | -0.0855880 |
| N  | -6.8059443 | -1.2320749 | 0.5534200  |
| N  | -6.5239783 | 0.4153391  | -0.7913550 |
| C  | -6.5625963 | -2.3557479 | 1.4410460  |
| H  | -7.0339603 | -3.2595089 | 1.0444700  |
| H  | -5.4840943 | -2.5134969 | 1.5131400  |
| H  | -6.9623803 | -2.1436589 | 2.4366870  |
| C  | -5.9169853 | 1.4157611  | -1.6557420 |
| H  | -6.2342283 | 2.4157571  | -1.3472110 |
| H  | -4.8289623 | 1.3429741  | -1.5749760 |
| H  | -6.2117143 | 1.2449431  | -2.6950400 |
| H  | 2.8981137  | -3.9424549 | -1.3243930 |
| H  | -1.1172783 | -0.0901749 | 0.8131880  |

Zero-point correction= 0.573872 (Hartree/Particle)

Thermal correction to Energy= 0.610320

Thermal correction to Enthalpy= 0.611265

Thermal correction to Gibbs Free Energy= 0.501932

Sum of electronic and zero-point Energies= -1757.904445

Sum of electronic and thermal Energies= -1757.867997

Sum of electronic and thermal Enthalpies= -1757.867052

Sum of electronic and thermal Free Energies= -1757.976385

## B-2

|   |            |            |            |
|---|------------|------------|------------|
| H | -0.2905108 | 3.5398815  | 3.0484390  |
| H | -0.3702998 | 2.0345895  | 3.9693570  |
| H | 1.1911202  | 2.8517975  | 3.7290800  |
| H | -1.3422818 | -5.7104695 | -0.6125870 |
| H | -1.0733028 | -4.5976535 | -1.9689290 |
| H | -0.0939668 | -4.4500365 | -0.4890980 |
| H | -4.2776998 | -3.3836445 | -0.4609310 |
| H | -3.5077368 | -3.9779385 | -1.9571460 |
| H | -3.7922468 | -5.0798635 | -0.5992220 |
| H | -2.9340058 | -3.1603655 | 1.6445290  |
| H | -1.1965898 | -3.5716965 | 1.6628100  |
| H | -2.4183098 | -4.8553575 | 1.5377030  |
| H | -2.6120378 | -1.7888945 | -1.0431950 |
| H | -1.3342318 | 3.0674115  | 0.5159820  |
| H | -2.3936228 | 2.8638955  | 2.7049050  |
| H | -2.7635248 | -0.9297825 | 3.1576780  |
| H | -0.4709148 | -0.8092435 | 2.2395990  |
| H | 0.0461442  | -0.2467895 | -1.7736480 |

|   |            |            |            |
|---|------------|------------|------------|
| H | -2.4223538 | -0.3804435 | -3.0702620 |
| H | -4.4573538 | 3.6941935  | -0.2010010 |
| H | -4.8612738 | 0.5608925  | -4.0901130 |
| H | -6.5072158 | 2.3888405  | -3.7368620 |
| H | -6.2926728 | 3.9255395  | -1.8151560 |
| C | 0.2393442  | 2.6001805  | 3.2540210  |
| C | -1.0913858 | -4.6762175 | -0.8754010 |
| C | -3.5081128 | -4.0557315 | -0.8627090 |
| C | -2.1694558 | -3.8318275 | 1.2337890  |
| C | -2.1354378 | -3.7341675 | -0.2880400 |
| N | -1.8353898 | -2.3379545 | -0.6920650 |
| O | 0.2644662  | -2.1457065 | 0.2006900  |
| C | -0.6997128 | -1.6813635 | -0.3886030 |
| O | -4.5638048 | 0.9090765  | 2.7427930  |
| C | -1.7985738 | 2.0960705  | 0.7571120  |
| C | -2.8397978 | 2.3187115  | 1.8610590  |
| C | -3.4033638 | 1.0296375  | 2.4124180  |
| C | -2.4248338 | -0.0642715 | 2.5911710  |
| C | -1.1882568 | -0.0010305 | 2.0897570  |
| C | -0.6724478 | 1.1486005  | 1.2505550  |
| C | 0.4539252  | 1.8296015  | 2.0063610  |
| C | 1.6200552  | 1.5894685  | 1.3830660  |
| O | 2.1773282  | 0.4067875  | -0.6967140 |
| C | 1.3710402  | 0.8063465  | 0.1778550  |
| N | 0.0502112  | 0.5934385  | 0.0996430  |
| C | -0.6190768 | -0.2129475 | -0.8963690 |
| C | -2.4183808 | 1.5337115  | -0.4937690 |

|    |            |            |            |
|----|------------|------------|------------|
| C  | -1.8909608 | 0.4938475  | -1.2076340 |
| N  | -2.7003908 | 0.1911905  | -2.2855040 |
| C  | -4.5384938 | 2.9903955  | -1.0259160 |
| C  | -3.6034678 | 1.9584865  | -1.1971080 |
| C  | -3.7431008 | 1.1038745  | -2.3152540 |
| C  | -4.7769018 | 1.2328585  | -3.2391240 |
| C  | -5.6878898 | 2.2555885  | -3.0354110 |
| C  | -5.5664168 | 3.1270835  | -1.9416880 |
| Au | 4.2824942  | 0.4283385  | -0.5270930 |
| C  | 8.3926812  | -0.2731475 | 0.0119660  |
| C  | 8.4605632  | 0.9109075  | -0.6407040 |
| H  | 9.1683972  | -0.9199815 | 0.3959120  |
| H  | 9.3076372  | 1.5092495  | -0.9439690 |
| C  | 6.2900952  | 0.3825445  | -0.4205800 |
| N  | 7.1602622  | 1.2996325  | -0.8981700 |
| N  | 7.0526042  | -0.5827385 | 0.1389930  |
| C  | 6.8100602  | 2.5239695  | -1.6019940 |
| H  | 7.1814912  | 2.4852715  | -2.6295990 |
| H  | 5.7228452  | 2.6247465  | -1.6167980 |
| H  | 7.2443862  | 3.3850465  | -1.0871940 |
| C  | 6.5631602  | -1.7923645 | 0.7838350  |
| H  | 6.9189732  | -2.6736125 | 0.2434700  |
| H  | 6.9139372  | -1.8300385 | 1.8185840  |
| H  | 5.4712162  | -1.7830165 | 0.7743170  |
| H  | -3.6765978 | 2.9251625  | 1.5066400  |
| H  | 2.6099682  | 1.9214285  | 1.6814720  |

Zero-point correction= 0.580634 (Hartree/Particle)



Thermal correction to Energy= 0.617694

Thermal correction to Enthalpy= 0.618638

Thermal correction to Gibbs Free Energy= 0.507188

Sum of electronic and zero-point Energies= -1758.025126

Sum of electronic and thermal Energies= -1757.988066

Sum of electronic and thermal Enthalpies= -1757.987122

Sum of electronic and thermal Free Energies= -1758.098572

### C-1

|    |            |            |            |
|----|------------|------------|------------|
| Au | 1.7455956  | -2.8504939 | -0.8447307 |
| C  | 4.8444506  | -0.3478949 | 0.5410243  |
| C  | 4.5974906  | -1.0563719 | 1.6708983  |
| H  | 5.4358046  | 0.5376811  | 0.3568683  |
| H  | 4.9881996  | -0.9547759 | 2.6728223  |
| C  | 3.3146036  | -1.9066059 | 0.0466033  |
| N  | 3.6521666  | -2.0111309 | 1.3489443  |
| N  | 4.0518866  | -0.8905699 | -0.4484417 |
| C  | 3.0031736  | -2.9051449 | 2.2964273  |
| H  | 1.9283786  | -2.6890739 | 2.3282973  |
| H  | 3.1631886  | -3.9466419 | 2.0028443  |
| H  | 3.4406636  | -2.7430099 | 3.2839513  |
| C  | 4.0679836  | -0.4234619 | -1.8342297 |
| H  | 4.9156066  | -0.8711159 | -2.3609247 |
| H  | 3.1401036  | -0.7249249 | -2.3286337 |
| H  | 4.1569716  | 0.6688581  | -1.8503607 |
| C  | -7.3026924 | 0.9979401  | 0.1873253  |
| C  | -7.3031504 | 0.6858441  | -1.1833747 |
| C  | -6.1860834 | 0.1472021  | -1.7997887 |

|   |            |            |            |
|---|------------|------------|------------|
| C | -5.0618554 | -0.0733299 | -1.0049017 |
| C | -5.0348664 | 0.2412221  | 0.3736693  |
| C | -6.1821824 | 0.7819241  | 0.9694373  |
| N | -3.8288364 | -0.5952459 | -1.3308607 |
| C | -3.0162524 | -0.5809349 | -0.2124837 |
| C | -3.7260284 | -0.0897029 | 0.8516013  |
| C | -1.6452704 | -1.1703949 | -0.3066077 |
| N | -0.9868724 | -0.7414359 | -1.5597167 |
| C | -0.3993904 | -1.6310099 | -2.4249977 |
| C | -0.5371094 | 0.6267941  | -1.6542287 |
| O | 0.0935596  | -1.3411269 | -3.4952217 |
| C | -0.2606424 | -3.0325479 | -1.9502547 |
| C | -0.0378134 | -4.2276989 | -1.7654637 |
| C | -1.3699684 | 1.6968201  | -1.9700167 |
| C | -0.8611544 | 2.9912521  | -1.9590157 |
| C | 0.4837776  | 3.2306911  | -1.6409367 |
| C | 1.3087876  | 2.1489201  | -1.2980507 |
| C | 0.7927736  | 0.8717891  | -1.3162297 |
| O | 0.9355196  | 4.4838751  | -1.6581047 |
| H | -1.7278234 | -2.2654449 | -0.3585157 |
| C | -0.7368264 | -0.9214149 | 0.9138743  |
| O | -0.0567324 | -1.8502019 | 1.3537883  |
| N | -0.7273184 | 0.3347931  | 1.3851703  |
| C | 0.1163736  | 0.8626481  | 2.4814693  |
| C | 1.5974226  | 0.7203131  | 2.1440933  |
| C | -0.2449544 | 2.3367141  | 2.6030533  |
| C | -0.2208164 | 0.1237051  | 3.7723853  |

|   |            |            |            |
|---|------------|------------|------------|
| C | 0.0682486  | -5.6679859 | -1.5981137 |
| H | -8.1995974 | 1.4182011  | 0.6358843  |
| H | -8.1988044 | 0.8707511  | -1.7715967 |
| H | -6.1862854 | -0.0951739 | -2.8602197 |
| H | -6.1875184 | 1.0290701  | 2.0289433  |
| H | -3.5025344 | -0.8010509 | -2.2633007 |
| H | -3.3608824 | 0.0100491  | 1.8666423  |
| H | -2.4145804 | 1.5264031  | -2.2228657 |
| H | -1.4905384 | 3.8404621  | -2.2115167 |
| H | 2.3360226  | 2.3149691  | -0.9900947 |
| H | 1.4246806  | 0.0339921  | -1.0191097 |
| H | 1.9002546  | 4.4879201  | -1.4659207 |
| H | -1.2876914 | 1.0116441  | 0.8780393  |
| H | 1.8713836  | 1.3198141  | 1.2676533  |
| H | 2.2021066  | 1.0708281  | 2.9897853  |
| H | 1.8495086  | -0.3262389 | 1.9465903  |
| H | 0.3504606  | 2.8069351  | 3.3927383  |
| H | -1.3067254 | 2.4636311  | 2.8532353  |
| H | -0.0360024 | 2.8657061  | 1.6633333  |
| H | 0.3515536  | 0.5494641  | 4.6052853  |
| H | 0.0200256  | -0.9409729 | 3.6884253  |
| H | -1.2886674 | 0.2221961  | 4.0056563  |
| H | -0.8008734 | -6.1543419 | -2.0543407 |
| H | 0.1005186  | -5.9427419 | -0.5389247 |
| H | 0.9694256  | -6.0524509 | -2.0867657 |
| B | 4.5318756  | 3.3120391  | -1.1688987 |
| F | 5.7812496  | 3.8375261  | -1.0127637 |

|   |           |           |            |
|---|-----------|-----------|------------|
| F | 4.2909466 | 2.3110121 | -0.1818057 |
| F | 4.3539226 | 2.7158611 | -2.4138457 |
| F | 3.5386736 | 4.3151981 | -0.9905847 |

Zero-point correction= 0.593289 (Hartree/Particle)

Thermal correction to Energy= 0.637698

Thermal correction to Enthalpy= 0.638642

Thermal correction to Gibbs Free Energy= 0.513427

Sum of electronic and zero-point Energies= -2182.458719

Sum of electronic and thermal Energies= -2182.414311

Sum of electronic and thermal Enthalpies= -2182.413366

Sum of electronic and thermal Free Energies= -2182.538582

### **C-ts1**

|   |            |            |            |
|---|------------|------------|------------|
| H | 2.2244691  | -1.4054953 | -4.1172109 |
| H | 3.5660991  | -0.2610823 | -4.1251789 |
| H | 3.5743091  | -1.6483753 | -3.0212379 |
| H | -2.8800649 | 4.9927767  | 0.4457271  |
| H | -1.7588289 | 3.6898927  | 0.0892241  |
| H | -2.2985169 | 4.7357087  | -1.1946099 |
| H | -5.1551589 | 1.9892817  | 0.5206381  |
| H | -3.5819429 | 2.1358887  | 1.2713371  |
| H | -4.7192789 | 3.4514807  | 1.3940921  |
| H | -5.8339769 | 3.5646537  | -1.3743709 |
| H | -4.6440599 | 4.6485207  | -2.0929769 |
| H | -5.2508299 | 4.9569167  | -0.4790069 |
| H | -3.9208389 | 2.5012847  | -2.5054989 |
| H | 1.8559461  | -5.2609833 | -1.3678329 |
| H | 0.6052201  | -1.4245083 | 0.8761931  |

|   |            |            |            |
|---|------------|------------|------------|
| H | 1.3678341  | -3.7191203 | 0.4806861  |
| H | -0.4788379 | -3.6816603 | -3.3602939 |
| H | -1.2570669 | -1.3401533 | -2.9565399 |
| H | -1.7337249 | 1.5463547  | 0.2254071  |
| H | -4.1868889 | -1.0553823 | -1.2046399 |
| H | -1.8240169 | -0.1992593 | 2.1502781  |
| H | -5.9063409 | -3.0779563 | 0.2050621  |
| H | -3.0110929 | -1.8990203 | 4.0901941  |
| H | -4.8014009 | -3.5813423 | 4.3104081  |
| H | -6.2318839 | -4.1638583 | 2.3957941  |
| C | 2.9595131  | -0.9025353 | -3.5009999 |
| C | -2.6115319 | 4.2371347  | -0.2851529 |
| C | -4.3469819 | 2.6765387  | 0.7335241  |
| C | -4.9617799 | 4.1752797  | -1.1697979 |
| C | -3.8254759 | 3.3257757  | -0.5635399 |
| N | -3.5042319 | 2.3182807  | -1.6163399 |
| O | -2.4591209 | 0.7111657  | -2.7866249 |
| C | -2.6435619 | 1.2722137  | -1.6978619 |
| O | 1.0143621  | -5.0725223 | -1.7853749 |
| C | 0.3582361  | -1.9125453 | -0.0462619 |
| C | 0.7882361  | -3.2137653 | -0.2617479 |
| C | 0.5227321  | -3.8252293 | -1.4862559 |
| C | -0.2537829 | -3.1726933 | -2.4451329 |
| C | -0.6863879 | -1.8680593 | -2.2208259 |
| C | -0.3397029 | -1.2243863 | -1.0344539 |
| C | 2.2366131  | -0.1230393 | -2.4861619 |
| C | 1.6077941  | 0.5058167  | -1.6533639 |

|    |            |            |            |
|----|------------|------------|------------|
| O  | 0.2766951  | 2.2957287  | -0.8609679 |
| C  | 0.3837851  | 1.0845757  | -1.0800289 |
| N  | -0.6018119 | 0.1837197  | -0.8302639 |
| C  | -1.9226589 | 0.7300967  | -0.4502689 |
| C  | -3.8059439 | -1.0503393 | -0.2079679 |
| C  | -2.7736809 | -0.2945263 | 0.2468961  |
| N  | -2.5583749 | -0.5706483 | 1.5961131  |
| C  | -5.2846349 | -2.8159723 | 1.0389221  |
| C  | -4.2701699 | -1.8569573 | 0.8996041  |
| C  | -3.4633009 | -1.5357223 | 2.0072241  |
| C  | -3.6353829 | -2.1456093 | 3.2534801  |
| C  | -4.6432649 | -3.0907513 | 3.3698311  |
| C  | -5.4649119 | -3.4252083 | 2.2708011  |
| Au | 3.5434451  | 0.8092907  | -0.4249909 |
| C  | 6.7913931  | 1.4067897  | 2.3020521  |
| C  | 6.2078611  | 2.6186907  | 2.3960181  |
| H  | 7.6493151  | 1.0114987  | 2.7911561  |
| H  | 6.4672491  | 3.4707817  | 2.9778771  |
| C  | 5.0131671  | 1.3968247  | 0.9229041  |
| N  | 5.1075281  | 2.6012147  | 1.5373751  |
| N  | 6.0467581  | 0.6656097  | 1.3875321  |
| C  | 4.2131821  | 3.7468547  | 1.3487151  |
| H  | 3.4110421  | 3.4732527  | 0.6843501  |
| H  | 3.7935281  | 4.0445177  | 2.2993191  |
| H  | 4.7586961  | 4.5757527  | 0.9195691  |
| C  | 6.3392201  | -0.7404983 | 1.0408021  |
| H  | 5.8418251  | -1.4093983 | 1.7235541  |

|   |           |            |            |
|---|-----------|------------|------------|
| H | 5.9991491 | -0.9474273 | 0.0425741  |
| H | 7.4067041 | -0.8933623 | 1.0869291  |
| F | 3.5948911 | -4.4848003 | -0.6155539 |
| B | 4.3262731 | -3.3672273 | -0.1197389 |
| F | 5.6786461 | -3.6989943 | 0.0960731  |
| F | 3.7378091 | -2.8943723 | 1.0895681  |
| F | 4.2619141 | -2.2953773 | -1.0887319 |

Zero-point correction= 0.639782 (Hartree/Particle)

Thermal correction to Energy= 0.682984

Thermal correction to Enthalpy= 0.683928

Thermal correction to Gibbs Free Energy= 0.555600

Sum of electronic and zero-point Energies= -2170.316775

Sum of electronic and thermal Energies= -2170.273574

Sum of electronic and thermal Enthalpies= -2170.272630

Sum of electronic and thermal Free Energies= -2170.400957

### **C-int1**

|   |            |            |            |
|---|------------|------------|------------|
| H | 1.6788766  | -3.0307337 | 1.6034709  |
| H | 2.1219706  | -3.4831247 | -0.0199331 |
| H | 3.1696416  | -2.3703977 | 0.8987449  |
| H | -3.4835204 | 3.5709443  | -3.0569311 |
| H | -2.6694514 | 2.8625173  | -1.6688121 |
| H | -2.1955894 | 2.3874003  | -3.3284101 |
| H | -5.9946854 | 1.1315023  | -1.6981741 |
| H | -4.7853614 | 1.9093113  | -0.6522941 |
| H | -5.6459024 | 2.8619963  | -1.8845861 |
| H | -5.4989844 | 0.7292583  | -4.1494761 |
| H | -3.9551954 | 1.2801323  | -4.8413681 |

|   |            |            |            |
|---|------------|------------|------------|
| H | -5.1889394 | 2.4605873  | -4.3391701 |
| H | -4.2151924 | -0.5312557 | -2.7639661 |
| H | -0.7478124 | -0.7063587 | 1.8563469  |
| H | -1.6272924 | -2.8950437 | 2.6971349  |
| H | -0.7052294 | -4.7603467 | -1.0890281 |
| H | -0.0496624 | -2.5403137 | -2.0192011 |
| H | -1.3393464 | 1.3369073  | -1.5809661 |
| H | -3.8990554 | -0.1862687 | 0.8854369  |
| H | -0.6467884 | 2.4693763  | 0.5863049  |
| H | -4.8469094 | 0.8314263  | 3.5714059  |
| H | -0.9413524 | 3.9352453  | 3.0438219  |
| H | -2.3758734 | 4.0190813  | 5.0707379  |
| H | -4.2981014 | 2.4899503  | 5.3280749  |
| C | 2.1303776  | -2.6398227 | 0.6837129  |
| C | -3.0390414 | 2.6440663  | -2.6764861 |
| C | -5.1973464 | 1.8845673  | -1.6675951 |
| C | -4.7210754 | 1.5017883  | -4.0893791 |
| C | -4.1103854 | 1.5615333  | -2.6905511 |
| N | -3.5847614 | 0.1972393  | -2.4404931 |
| O | -2.6440564 | -1.5902567 | -1.4701001 |
| C | -2.6485364 | -0.3753747 | -1.6350891 |
| O | -1.4525594 | -5.0685677 | 1.4188769  |
| C | -0.7706414 | -1.5964457 | 1.2287149  |
| C | -1.2337734 | -2.7727347 | 1.6924189  |
| C | -1.1291704 | -3.9483007 | 0.8731659  |
| C | -0.7132694 | -3.8591477 | -0.4867491 |
| C | -0.3439034 | -2.6578317 | -0.9785631 |



|    |            |            |            |
|----|------------|------------|------------|
| C  | -0.1310474 | -1.4818217 | -0.1089551 |
| C  | 1.4235336  | -1.4456897 | 0.1586179  |
| C  | 1.9174466  | -0.2429637 | -0.1841131 |
| O  | 0.7974026  | 1.8025843  | -0.8843851 |
| C  | 0.8036596  | 0.5978903  | -0.6470301 |
| N  | -0.3400194 | -0.1957427 | -0.7482821 |
| C  | -1.6154604 | 0.4927373  | -0.9414011 |
| C  | -3.2166964 | 0.6226483  | 1.1219789  |
| C  | -2.1659654 | 1.0309333  | 0.3419529  |
| N  | -1.4939534 | 2.0603103  | 0.9688589  |
| C  | -3.9986604 | 1.5023193  | 3.4517379  |
| C  | -3.2011484 | 1.4361163  | 2.3002989  |
| C  | -2.1021554 | 2.3236203  | 2.1747859  |
| C  | -1.7882174 | 3.2623873  | 3.1581509  |
| C  | -2.5940504 | 3.3012233  | 4.2834389  |
| C  | -3.6883324 | 2.4300963  | 4.4296339  |
| Au | 3.8472286  | 0.4497873  | -0.1105801 |
| C  | 7.5891766  | 2.5422123  | -0.1903431 |
| C  | 8.0455926  | 1.3103223  | 0.1354829  |
| H  | 8.1101126  | 3.4755293  | -0.3490591 |
| H  | 9.0466396  | 0.9474283  | 0.3196099  |
| C  | 5.8017696  | 1.1695393  | -0.0631731 |
| N  | 6.9384306  | 0.4852453  | 0.2086249  |
| N  | 6.2155236  | 2.4359443  | -0.3076291 |
| C  | 6.9980496  | -0.9300617 | 0.5307829  |
| H  | 5.9825656  | -1.3332887 | 0.5094909  |
| H  | 7.6094156  | -1.4600827 | -0.2053251 |

|   |            |            |            |
|---|------------|------------|------------|
| H | 7.4217736  | -1.0736937 | 1.5290189  |
| C | 5.3379876  | 3.5414153  | -0.6505641 |
| H | 5.6102796  | 3.9495143  | -1.6284171 |
| H | 4.3102606  | 3.1706293  | -0.6896331 |
| H | 5.4089356  | 4.3290943  | 0.1055129  |
| H | -1.0646964 | -5.8386827 | 0.8809689  |
| B | 1.2158116  | -6.3522537 | 0.1819209  |
| F | 1.9354816  | -7.4975157 | 0.3131879  |
| F | -0.2079994 | -6.7099397 | 0.0095809  |
| F | 1.5758196  | -5.6103857 | -0.9355551 |
| F | 1.2634036  | -5.5499117 | 1.3197629  |

Zero-point correction= 0.595415 (Hartree/Particle)

Thermal correction to Energy= 0.638389

Thermal correction to Enthalpy= 0.639334

Thermal correction to Gibbs Free Energy= 0.514318

Sum of electronic and zero-point Energies= -2182.465375

Sum of electronic and thermal Energies= -2182.422400

Sum of electronic and thermal Enthalpies= -2182.421456

Sum of electronic and thermal Free Energies= -2182.546472

### **C-ts2**

|   |            |            |            |
|---|------------|------------|------------|
| H | -0.3493076 | -2.5202959 | -2.1151099 |
| H | 0.0246694  | -1.2863769 | -3.3129689 |
| H | 1.3489764  | -2.1546729 | -2.4975349 |
| H | 2.2735364  | 3.9753191  | -1.7813969 |
| H | 1.2385964  | 2.5670981  | -1.4708849 |
| H | 0.7726574  | 3.7626481  | -2.7037549 |
| H | 0.5632924  | 4.8506371  | 1.4649011  |

|   |            |            |            |
|---|------------|------------|------------|
| H | 1.4043934  | 3.3411021  | 0.9983191  |
| H | 2.1265304  | 4.9013881  | 0.6336411  |
| H | -0.0540976 | 6.5390081  | -0.3595749 |
| H | -0.0493996 | 6.0349761  | -2.0690119 |
| H | 1.4816354  | 6.2906211  | -1.2186059 |
| H | -1.5735286 | 4.6734091  | -1.1173719 |
| H | -4.3619216 | -2.2955429 | -2.7487369 |
| H | -1.3685906 | -1.2945799 | 0.5863161  |
| H | -3.2393616 | -2.3420389 | -0.6669409 |
| H | -2.8540846 | 0.7034311  | -3.6994939 |
| H | -0.9140396 | 1.7273291  | -2.5151799 |
| H | -0.3101586 | 2.4424431  | 1.5483321  |
| H | -3.6513116 | 0.8166521  | 0.1706081  |
| H | -0.8078666 | 0.7776551  | 3.2327991  |
| H | -5.1326436 | -1.6476919 | 1.1317791  |
| H | -1.9232806 | -1.1937609 | 4.9744131  |
| H | -3.7186326 | -2.9190929 | 5.0006061  |
| H | -5.2832066 | -3.1499289 | 3.1007551  |
| C | 0.3556424  | -1.7155449 | -2.3589429 |
| C | 1.2327824  | 3.6346241  | -1.7154499 |
| C | 1.1712774  | 4.3658381  | 0.6905191  |
| C | 0.4586664  | 5.9166211  | -1.1027419 |
| C | 0.4801024  | 4.4517711  | -0.6670949 |
| N | -0.9480646 | 4.0570831  | -0.6088439 |
| O | -2.9217286 | 3.1460851  | -0.0636239 |
| C | -1.7040616 | 3.1133071  | 0.0238711  |
| O | -3.9326846 | -1.4696869 | -3.1262199 |

|    |            |            |            |
|----|------------|------------|------------|
| C  | -1.8171246 | -0.7518339 | -0.2509289 |
| C  | -2.7229126 | -1.4699849 | -1.0663949 |
| C  | -3.0680376 | -0.9459339 | -2.3005489 |
| C  | -2.4445616 | 0.2787871  | -2.7865089 |
| C  | -1.4071676 | 0.8308791  | -2.1438119 |
| C  | -0.8221746 | 0.1823661  | -0.9314889 |
| C  | 0.4140234  | -0.6936659 | -1.2831979 |
| C  | 1.4469834  | -0.4244149 | -0.4595819 |
| O  | 1.5617644  | 1.0868171  | 1.4584231  |
| C  | 1.0133124  | 0.6452491  | 0.4563181  |
| N  | -0.2114296 | 1.1311691  | -0.0113119 |
| C  | -1.0149046 | 2.0062581  | 0.8283681  |
| C  | -3.0247616 | 0.3884981  | 0.9442531  |
| C  | -1.9741536 | 1.1178361  | 1.5353731  |
| N  | -1.6594906 | 0.5676521  | 2.7265571  |
| C  | -4.4579426 | -1.5308479 | 1.9762551  |
| C  | -3.4567456 | -0.5641559 | 1.9563611  |
| C  | -2.5573226 | -0.4628499 | 3.0328221  |
| C  | -2.6252586 | -1.2860939 | 4.1490701  |
| C  | -3.6326206 | -2.2446429 | 4.1519531  |
| C  | -4.5282386 | -2.3685389 | 3.0822201  |
| Au | 3.3107364  | -1.2520879 | -0.2455329 |
| C  | 7.2478204  | -2.3366319 | 1.0327291  |
| C  | 7.1316914  | -3.2117309 | 0.0066901  |
| H  | 8.0533564  | -2.1623409 | 1.7316171  |
| H  | 7.8143114  | -3.9581069 | -0.3735809 |
| C  | 5.2175654  | -2.0189269 | 0.0988791  |

|   |            |            |            |
|---|------------|------------|------------|
| N | 5.8838044  | -3.0017699 | -0.5514559 |
| N | 6.0683424  | -1.6165069 | 1.0735871  |
| C | 5.3604434  | -3.7463029 | -1.6824369 |
| H | 4.3587814  | -3.3714399 | -1.9067699 |
| H | 6.0021314  | -3.6074239 | -2.5575859 |
| H | 5.2998014  | -4.8113729 | -1.4399919 |
| C | 5.7869794  | -0.5683849 | 2.0405651  |
| H | 6.5040084  | 0.2504061  | 1.9290091  |
| H | 4.7765174  | -0.1886639 | 1.8638201  |
| H | 5.8473404  | -0.9693729 | 3.0566051  |
| B | -5.5384786 | -3.4195229 | -0.9282729 |
| F | -4.8467566 | -3.6401649 | -2.1792039 |
| F | -4.6591586 | -3.7847289 | 0.0909761  |
| F | -5.7707566 | -2.0381409 | -0.8576699 |
| F | -6.6945026 | -4.1391679 | -0.9035559 |

Zero-point correction= 0.595349 (Hartree/Particle)

Thermal correction to Energy= 0.637614

Thermal correction to Enthalpy= 0.638558

Thermal correction to Gibbs Free Energy= 0.515079

Sum of electronic and zero-point Energies= -2182.445898

Sum of electronic and thermal Energies= -2182.403633

Sum of electronic and thermal Enthalpies= -2182.402689

Sum of electronic and thermal Free Energies= -2182.526168

### **C-int2**

|   |            |            |            |
|---|------------|------------|------------|
| H | -0.1670759 | -2.7515561 | -1.6283781 |
| H | 0.0930271  | -1.6594411 | -2.9777971 |
| H | 1.4981341  | -2.3507651 | -2.1214391 |

|   |            |            |            |
|---|------------|------------|------------|
| H | 2.2419171  | 3.6924959  | -2.2338991 |
| H | 1.2294111  | 2.3543659  | -1.6617801 |
| H | 0.6841731  | 3.3686799  | -3.0187361 |
| H | 0.7500901  | 5.0513619  | 0.9516779  |
| H | 1.4731961  | 3.4359529  | 0.6842569  |
| H | 2.2703981  | 4.8730429  | 0.0592359  |
| H | 0.0585741  | 6.4703629  | -1.0400001 |
| H | -0.0423759 | 5.7369159  | -2.6626841 |
| H | 1.5375671  | 6.0641239  | -1.9341791 |
| H | -1.5510879 | 4.6453399  | -1.3335201 |
| H | -3.9609979 | -2.7665671 | -2.6316151 |
| H | -1.3028219 | -1.2330691 | 0.7731029  |
| H | -3.0288469 | -2.5224371 | -0.4553321 |
| H | -2.6702429 | 0.2847069  | -3.6946931 |
| H | -0.8492889 | 1.5151009  | -2.5343141 |
| H | -0.2422789 | 2.5163069  | 1.5055929  |
| H | -3.3882569 | 0.8199689  | -0.1542901 |
| H | -1.5815769 | 1.5580039  | 3.3971329  |
| H | -5.0087829 | -1.6741291 | 0.7466379  |
| H | -3.1895499 | 0.0074889  | 5.1245229  |
| H | -4.9587929 | -1.7539221 | 5.0544779  |
| H | -5.8253479 | -2.5811411 | 2.8915439  |
| C | 0.4861981  | -1.9502201 | -1.9959681 |
| C | 1.2072121  | 3.3760489  | -2.0540371 |
| C | 1.2884191  | 4.4177199  | 0.2351639  |
| C | 0.5150951  | 5.7377279  | -1.7168681 |
| C | 0.5331441  | 4.3456719  | -1.0876241 |

|    |            |            |            |
|----|------------|------------|------------|
| N  | -0.9004499 | 4.0062109  | -0.8879401 |
| O  | -2.8097099 | 3.3306299  | 0.0938479  |
| C  | -1.5989189 | 3.1979669  | -0.0526981 |
| O  | -3.5787339 | -1.9586531 | -3.0599151 |
| C  | -1.8031439 | -0.7037201 | -0.0528041 |
| C  | -2.5805479 | -1.6385811 | -0.9052281 |
| C  | -2.8441659 | -1.2819081 | -2.1874051 |
| C  | -2.2761379 | -0.0470271 | -2.7363611 |
| C  | -1.2994849 | 0.6207289  | -2.1083681 |
| C  | -0.7196249 | 0.0842119  | -0.8277611 |
| C  | 0.5157441  | -0.8030551 | -1.0531221 |
| C  | 1.5515801  | -0.4330661 | -0.2678251 |
| O  | 1.6704631  | 1.3156929  | 1.4366409  |
| C  | 1.1175161  | 0.7295259  | 0.5151439  |
| N  | -0.1346269 | 1.1289319  | 0.0186279  |
| C  | -0.9224919 | 2.0854919  | 0.7531089  |
| C  | -2.8265179 | 0.3333769  | 0.6501049  |
| C  | -2.0002389 | 1.2870249  | 1.4008489  |
| N  | -2.1365739 | 1.0878169  | 2.6898099  |
| C  | -4.6080159 | -1.3014251 | 1.6876419  |
| C  | -3.6153679 | -0.3360741 | 1.7262069  |
| C  | -3.1315689 | 0.1092449  | 2.9595819  |
| C  | -3.5829279 | -0.3594901 | 4.1798449  |
| C  | -4.5720839 | -1.3402391 | 4.1266309  |
| C  | -5.0690529 | -1.8009881 | 2.9061649  |
| Au | 3.4104181  | -1.2508571 | 0.0145349  |
| C  | 7.3758731  | -2.3308771 | 1.2328669  |

|   |            |            |            |
|---|------------|------------|------------|
| C | 7.1610211  | -3.3283001 | 0.3434839  |
| H | 8.2285031  | -2.1053851 | 1.8572669  |
| H | 7.7869681  | -4.1524661 | 0.0326589  |
| C | 5.3078461  | -2.0386761 | 0.3747189  |
| N | 5.8919611  | -3.1322641 | -0.1701951 |
| N | 6.2324541  | -1.5534681 | 1.2381349  |
| C | 5.2710441  | -3.9945571 | -1.1596671 |
| H | 4.2712571  | -3.6085021 | -1.3738131 |
| H | 5.8606551  | -4.0003821 | -2.0812261 |
| H | 5.1870041  | -5.0147861 | -0.7738371 |
| C | 6.0531821  | -0.3727251 | 2.0653579  |
| H | 6.7929401  | 0.3894089  | 1.8024719  |
| H | 5.0491361  | 0.0249229  | 1.8932469  |
| H | 6.1599791  | -0.6343291 | 3.1222859  |
| B | -5.2282959 | -3.8656921 | -0.7663041 |
| F | -4.3188309 | -4.1423591 | -1.8389781 |
| F | -4.4999059 | -3.9227521 | 0.4277559  |
| F | -5.6766489 | -2.5475741 | -0.9561351 |
| F | -6.2607139 | -4.7591431 | -0.7755991 |

Zero-point correction= 0.597217 (Hartree/Particle)

Thermal correction to Energy= 0.639529

Thermal correction to Enthalpy= 0.640473

Thermal correction to Gibbs Free Energy= 0.518166

Sum of electronic and zero-point Energies= -2182.450147

Sum of electronic and thermal Energies= -2182.407836

Sum of electronic and thermal Enthalpies= -2182.406892

Sum of electronic and thermal Free Energies= -2182.529199



**C-ts3**

|   |            |            |            |
|---|------------|------------|------------|
| H | -0.1027688 | -2.7782490 | -2.0581718 |
| H | 0.4785752  | -1.6322750 | -3.2567998 |
| H | 1.6494952  | -2.5584920 | -2.2853518 |
| H | 2.3170872  | 3.8840240  | -1.6606448 |
| H | 1.3854862  | 2.4048230  | -1.3660498 |
| H | 0.9143702  | 3.5061770  | -2.6815928 |
| H | 0.2853492  | 4.7277350  | 1.4053442  |
| H | 1.2648292  | 3.2621690  | 1.0686382  |
| H | 1.9073232  | 4.8581240  | 0.7050282  |
| H | -0.3175898 | 6.2877220  | -0.5279908 |
| H | -0.1332418 | 5.7254710  | -2.2096158 |
| H | 1.2974572  | 6.1400030  | -1.2529528 |
| H | -1.6252468 | 4.2891940  | -1.2874148 |
| H | -4.7477378 | -1.6894640 | -2.7716048 |
| H | -1.1345988 | -2.0515740 | 0.0153992  |
| H | -3.4687938 | -2.2730880 | -0.8920648 |
| H | -2.4523778 | 0.7480940  | -3.7817858 |
| H | -0.3511268 | 1.2650510  | -2.5918948 |
| H | -0.3682788 | 2.1308000  | 1.5201142  |
| H | -3.3210298 | -0.3653980 | -0.1121988 |
| H | -2.6790888 | 1.9138370  | 2.9761922  |
| H | -3.7989318 | -3.0768340 | 1.2399242  |
| H | -4.3733758 | 0.5054660  | 4.7118652  |
| H | -5.4804608 | -1.7157780 | 4.9547102  |
| H | -5.1738388 | -3.4666580 | 3.2436142  |
| C | 0.6864542  | -2.0389420 | -2.2577828 |

|   |            |            |            |
|---|------------|------------|------------|
| C | 1.3067262  | 3.4569800  | -1.6576558 |
| C | 0.9891382  | 4.2584230  | 0.7058422  |
| C | 0.3025232  | 5.6848480  | -1.2024648 |
| C | 0.4098492  | 4.2440720  | -0.7052538 |
| N | -0.9813618 | 3.7314080  | -0.7359448 |
| O | -2.9044558 | 2.6874290  | -0.2295678 |
| C | -1.6875798 | 2.7488640  | -0.1155568 |
| O | -4.1566408 | -0.9606930 | -3.1227638 |
| C | -1.6388428 | -1.1322040 | -0.3132538 |
| C | -2.8594848 | -1.4174100 | -1.1798848 |
| C | -3.0945128 | -0.7816950 | -2.3771728 |
| C | -2.1728588 | 0.2324740  | -2.8664828 |
| C | -1.0408018 | 0.5096900  | -2.2147998 |
| C | -0.5769838 | -0.1821750 | -0.9611318 |
| C | 0.7039222  | -0.9657130 | -1.2312518 |
| C | 1.7133802  | -0.5776980 | -0.4271758 |
| O | 1.7521212  | 1.1130520  | 1.3388732  |
| C | 1.2015622  | 0.5195460  | 0.4217222  |
| N | -0.0879908 | 0.8231690  | -0.0175858 |
| C | -0.9816708 | 1.6717790  | 0.7297532  |
| C | -2.3856758 | -0.4677760 | 0.8343222  |
| C | -2.0244298 | 0.7978920  | 1.3433842  |
| N | -2.6683188 | 1.0266840  | 2.4908762  |
| C | -3.8607788 | -2.3142340 | 2.0125082  |
| C | -3.2112568 | -1.0891810 | 1.8894392  |
| C | -3.4144118 | -0.0990480 | 2.8652582  |
| C | -4.2244948 | -0.2822920 | 3.9772662  |

|    |            |            |            |
|----|------------|------------|------------|
| C  | -4.8372608 | -1.5217050 | 4.1000982  |
| C  | -4.6575638 | -2.5170370 | 3.1320462  |
| Au | 3.6355002  | -1.2287670 | -0.1479058 |
| C  | 7.6243972  | -1.8477760 | 1.2719272  |
| C  | 7.6248062  | -2.7853400 | 0.2956562  |
| H  | 8.3887542  | -1.5547020 | 1.9773542  |
| H  | 8.3889092  | -3.4784600 | -0.0259218 |
| C  | 5.5992152  | -1.7879570 | 0.2762302  |
| N  | 6.3782202  | -2.7330310 | -0.3012578 |
| N  | 6.3785442  | -1.2488560 | 1.2447592  |
| C  | 5.9627152  | -3.5861910 | -1.3991988 |
| H  | 4.9358162  | -3.3249420 | -1.6662648 |
| H  | 6.6116892  | -3.4320190 | -2.2664798 |
| H  | 6.0003122  | -4.6374210 | -1.0982838 |
| C  | 5.9661702  | -0.1837330 | 2.1444132  |
| H  | 6.6151632  | 0.6879230  | 2.0179582  |
| H  | 4.9355192  | 0.0977360  | 1.9091452  |
| H  | 6.0161812  | -0.5276650 | 3.1817362  |
| B  | -5.7603428 | -3.1340440 | -0.9192938 |
| F  | -5.5766798 | -2.9395800 | -2.3358308 |
| F  | -4.6548628 | -3.8958620 | -0.4803308 |
| F  | -5.7035658 | -1.8794040 | -0.3229248 |
| F  | -6.9362498 | -3.7792980 | -0.6858448 |

Zero-point correction= 0.591585 (Hartree/Particle)

Thermal correction to Energy= 0.633875

Thermal correction to Enthalpy= 0.634819

Thermal correction to Gibbs Free Energy= 0.511968

Sum of electronic and zero-point Energies= -2182.408004

Sum of electronic and thermal Energies= -2182.365715

Sum of electronic and thermal Enthalpies= -2182.364770

Sum of electronic and thermal Free Energies= -2182.487621

### **C-int3**

|   |            |            |            |
|---|------------|------------|------------|
| H | -1.1468234 | -3.5762121 | -1.6901767 |
| H | -0.6278574 | -3.9414301 | -0.0348257 |
| H | -2.3401264 | -3.6324981 | -0.3901827 |
| H | -0.9750314 | 5.2291679  | 0.9777793  |
| H | -1.0529884 | 3.4718529  | 0.7090803  |
| H | -0.8923924 | 4.1062629  | 2.3501173  |
| H | 2.5045976  | 4.6170159  | -0.2563057 |
| H | 1.0656936  | 3.8409329  | -0.9508277 |
| H | 1.0202826  | 5.5460259  | -0.5078337 |
| H | 2.6063666  | 5.3235579  | 2.1198993  |
| H | 1.1768436  | 5.1711879  | 3.1729303  |
| H | 1.1648076  | 6.3181569  | 1.8240913  |
| H | 1.7678526  | 3.0247209  | 2.7010673  |
| H | 0.4801646  | -1.1403951 | -2.4161077 |
| H | 0.9593196  | -3.4348181 | -1.8015577 |
| H | 2.3946676  | -2.9988531 | 1.8255863  |
| H | 0.5160796  | -1.4104571 | 1.8817693  |
| H | 0.2359666  | 2.1391379  | -0.4600667 |
| H | 3.2700706  | 2.4665869  | -0.0595767 |
| H | 3.9326336  | -1.8391171 | -3.2580467 |
| H | 5.7889316  | 2.3781529  | -1.3027147 |
| H | 7.1722646  | 0.9222679  | -2.7720487 |

|   |            |            |            |
|---|------------|------------|------------|
| H | 6.2261236  | -1.1512091 | -3.7309187 |
| C | -1.3163564 | -3.3283911 | -0.6318637 |
| C | -0.5821924 | 4.2597009  | 1.3092093  |
| C | 1.4094866  | 4.5662579  | -0.2067567 |
| C | 1.5095146  | 5.3271349  | 2.1387463  |
| C | 0.9411356  | 4.2553719  | 1.2122993  |
| N | 1.5024376  | 2.9694199  | 1.7207353  |
| O | 1.1153466  | 0.8325359  | 2.3579893  |
| C | 1.0768206  | 1.6783579  | 1.4848893  |
| O | 3.3811296  | -3.9131211 | -0.4956647 |
| C | 1.1205226  | -1.2884971 | -1.5318637 |
| C | 1.7400966  | -2.6834941 | -1.6167227 |
| C | 2.4219246  | -3.0966731 | -0.3586797 |
| C | 1.9302856  | -2.6489851 | 0.9041933  |
| C | 0.9072296  | -1.7620351 | 0.9285713  |
| C | 0.2194336  | -1.1953661 | -0.2798617 |
| C | -1.1577254 | -1.8698021 | -0.3724127 |
| C | -2.1519304 | -0.9847511 | -0.1580887 |
| O | -2.0749334 | 1.4285009  | 0.2271233  |
| C | -1.5345764 | 0.3454579  | 0.0418983  |
| N | -0.1673034 | 0.1826279  | -0.0397837 |
| C | 0.7362196  | 1.2948249  | 0.0367123  |
| C | 2.1714626  | -0.2126851 | -1.4368697 |
| C | 1.9863846  | 0.9170709  | -0.6852867 |
| N | 3.1186976  | 1.6926309  | -0.6918697 |
| C | 4.3128436  | -0.9273851 | -2.8042277 |
| C | 3.5150276  | -0.1375071 | -1.9591917 |

|    |            |            |            |
|----|------------|------------|------------|
| C  | 4.0802546  | 1.0589549  | -1.4476717 |
| C  | 5.3857246  | 1.4588979  | -1.7218547 |
| C  | 6.1467466  | 0.6446779  | -2.5417027 |
| C  | 5.6097526  | -0.5335941 | -3.0823647 |
| Au | -4.1951774 | -1.1062951 | -0.0846587 |
| C  | -8.3304874 | -0.1148141 | 0.3276013  |
| C  | -8.4845384 | -1.4452021 | 0.1308763  |
| H  | -9.0559594 | 0.6677749  | 0.4978223  |
| H  | -9.3710554 | -2.0619841 | 0.0942283  |
| C  | -6.2726844 | -1.0001171 | 0.0545983  |
| N  | -7.2147624 | -1.9684101 | -0.0341007 |
| N  | -6.9724424 | 0.1384189  | 0.2778503  |
| C  | -6.9333994 | -3.3727271 | -0.2658257 |
| H  | -5.8511404 | -3.4943201 | -0.3542697 |
| H  | -7.2964964 | -3.9760751 | 0.5715993  |
| H  | -7.4115564 | -3.7086351 | -1.1908777 |
| C  | -6.3822724 | 1.4573809  | 0.4470903  |
| H  | -6.6465564 | 1.8623669  | 1.4283223  |
| H  | -5.2936734 | 1.3724149  | 0.3756863  |
| H  | -6.7420894 | 2.1325699  | -0.3348897 |
| H  | 2.4479006  | -2.7794991 | -2.4427977 |
| H  | 3.8220536  | -4.2374801 | 0.4115753  |
| B  | 4.7590186  | -3.5783331 | 2.4230453  |
| F  | 5.9320526  | -3.9365891 | 2.9976603  |
| F  | 4.8651146  | -2.5272281 | 1.5319503  |
| F  | 3.7380126  | -3.3586921 | 3.3297183  |
| F  | 4.2892326  | -4.7246951 | 1.5770323  |

Zero-point correction= 0.595741 (Hartree/Particle)

Thermal correction to Energy= 0.638405

Thermal correction to Enthalpy= 0.639349

Thermal correction to Gibbs Free Energy= 0.514570

Sum of electronic and zero-point Energies= -2182.480826

Sum of electronic and thermal Energies= -2182.438162

Sum of electronic and thermal Enthalpies= -2182.437218

Sum of electronic and thermal Free Energies= -2182.561996

#### **C-int4**

|   |            |            |            |
|---|------------|------------|------------|
| H | -1.2516132 | -3.6014561 | -1.2873517 |
| H | -0.9672522 | -3.8633651 | 0.4419803  |
| H | -2.5231862 | -3.2169851 | -0.1232757 |
| H | 0.8506948  | 5.1687159  | 0.3981683  |
| H | 0.3741778  | 3.4550629  | 0.3367093  |
| H | 0.5115508  | 4.2773679  | 1.8951713  |
| H | 4.1835638  | 3.5987309  | -0.2615437 |
| H | 2.6799777  | 3.0709659  | -1.0451077 |
| H | 3.0045558  | 4.7899369  | -0.8289767 |
| H | 4.2068848  | 4.6189599  | 1.9990173  |
| H | 2.6815567  | 4.9607249  | 2.8554423  |
| H | 3.0917068  | 5.8578259  | 1.3851643  |
| H | 2.7669827  | 2.6929769  | 2.7425473  |
| H | 1.0682418  | -1.7216331 | -1.9879317 |
| H | 0.8343428  | -3.9895601 | -1.1126207 |
| H | 1.9378258  | -3.5087361 | 2.5861473  |
| H | 0.5153498  | -1.5061471 | 2.2855373  |
| H | 1.4207558  | 1.7001399  | -0.4599237 |

|   |            |            |            |
|---|------------|------------|------------|
| H | 4.3696428  | 1.3871699  | 0.3326883  |
| H | 4.3287028  | -3.4314271 | -2.1077427 |
| H | 6.9161618  | 0.5368509  | -0.4923227 |
| H | 8.0660167  | -1.4147211 | -1.5269987 |
| H | 6.7594668  | -3.3594271 | -2.3216347 |
| C | -1.4412752 | -3.1925911 | -0.2854127 |
| C | 0.9572618  | 4.1966059  | 0.8960523  |
| C | 3.1100858  | 3.8057089  | -0.3574457 |
| C | 3.1484088  | 4.8750539  | 1.8657603  |
| C | 2.4345928  | 3.8306699  | 1.0111953  |
| N | 2.6096408  | 2.5452049  | 1.7487123  |
| O | 1.6512308  | 0.6781549  | 2.5952243  |
| C | 1.9072698  | 1.3608069  | 1.6223113  |
| O | 2.9972888  | -4.8307221 | 0.6066183  |
| C | 1.5340628  | -1.9441151 | -1.0132017 |
| C | 1.7689958  | -3.4505631 | -0.9116057 |
| C | 2.2433938  | -3.8868641 | 0.4579243  |
| C | 1.6833318  | -3.1375901 | 1.5957133  |
| C | 0.9174278  | -2.0509581 | 1.4320333  |
| C | 0.5432658  | -1.4797831 | 0.0850663  |
| C | -0.9327782 | -1.7979391 | -0.1718527 |
| C | -1.6864442 | -0.6743621 | -0.2002687 |
| O | -1.0310162 | 1.6762639  | -0.0993247 |
| C | -0.7691742 | 0.4799439  | -0.0516847 |
| N | 0.4969868  | -0.0218941 | 0.1330813  |
| C | 1.6376758  | 0.8471969  | 0.2000933  |
| C | 2.8106898  | -1.1549621 | -0.8557647 |



|    |            |            |            |
|----|------------|------------|------------|
| C  | 2.8267948  | 0.0878809  | -0.2834227 |
| N  | 4.1094598  | 0.5746109  | -0.2087917 |
| C  | 4.8631728  | -2.5560741 | -1.7505127 |
| C  | 4.1864358  | -1.4740461 | -1.1623767 |
| C  | 4.9660338  | -0.3712021 | -0.7256017 |
| C  | 6.3533578  | -0.3257671 | -0.8432677 |
| C  | 6.9837858  | -1.4138881 | -1.4208837 |
| C  | 6.2412748  | -2.5160391 | -1.8716047 |
| Au | -3.6725432 | -0.2499761 | -0.5759667 |
| C  | -7.3190262 | 1.8193659  | -1.3575647 |
| C  | -7.8442542 | 0.5871789  | -1.1612517 |
| H  | -7.7886642 | 2.7662619  | -1.5821437 |
| H  | -8.8670453 | 0.2387989  | -1.1726437 |
| C  | -5.6083402 | 0.4099359  | -0.9409107 |
| N  | -6.7818172 | -0.2612331 | -0.9110557 |
| N  | -5.9498842 | 1.6914339  | -1.2176587 |
| C  | -6.9247682 | -1.6717981 | -0.5949807 |
| H  | -5.9362212 | -2.1344551 | -0.5835017 |
| H  | -7.3769492 | -1.7927811 | 0.3936743  |
| H  | -7.5498312 | -2.1572581 | -1.3499497 |
| C  | -5.0070372 | 2.7890829  | -1.3609617 |
| H  | -5.3274012 | 3.6331009  | -0.7435107 |
| H  | -4.0195642 | 2.4564499  | -1.0268937 |
| H  | -4.9457212 | 3.1050719  | -2.4068767 |
| H  | 2.4836878  | -3.8063451 | -1.6571577 |
| B  | -4.6567682 | -2.3572731 | 2.2324273  |
| F  | -5.2808022 | -1.1901341 | 2.0913193  |

|   |            |            |           |
|---|------------|------------|-----------|
| F | -4.5826923 | -3.1383721 | 1.1508943 |
| F | -4.5980652 | -2.9165251 | 3.4249543 |
| F | -2.8335092 | -1.7113421 | 2.2130103 |
| H | -2.5601232 | -1.2898981 | 1.3968403 |

Zero-point correction= 0.596110 (Hartree/Particle)

Thermal correction to Energy= 0.639209

Thermal correction to Enthalpy= 0.640153

Thermal correction to Gibbs Free Energy= 0.516189

Sum of electronic and zero-point Energies= -2182.472208

Sum of electronic and thermal Energies= -2182.429110

Sum of electronic and thermal Enthalpies= -2182.428166

Sum of electronic and thermal Free Energies= -2182.552129

#### **C-ts4**

|   |            |            |            |
|---|------------|------------|------------|
| H | -1.5555015 | -3.5847752 | -0.5397897 |
| H | -0.9503355 | -3.8745562 | 1.1001983  |
| H | -2.5825765 | -3.1944572 | 0.8408363  |
| H | 0.8886505  | 5.1267907  | 0.8700193  |
| H | 0.4057365  | 3.4162148  | 0.8500153  |
| H | 0.8096915  | 4.2023038  | 2.3822783  |
| H | 4.0530535  | 3.5663458  | -0.3888927 |
| H | 2.4337755  | 3.0519728  | -0.9072977 |
| H | 2.7973445  | 4.7668118  | -0.7255457 |
| H | 4.4693675  | 4.5590138  | 1.8481803  |
| H | 3.1153725  | 4.8834417  | 2.9613343  |
| H | 3.2640365  | 5.8032277  | 1.4560623  |
| H | 3.1985285  | 2.6149338  | 2.7955193  |
| H | 0.6353695  | -1.7274862 | -1.6024047 |

|   |            |            |            |
|---|------------|------------|------------|
| H | 0.5413105  | -4.0052163 | -0.7260347 |
| H | 2.2984575  | -3.5682612 | 2.7223563  |
| H | 0.8697465  | -1.5519622 | 2.7054413  |
| H | 1.2892665  | 1.6742968  | -0.1256617 |
| H | 4.3283285  | 1.3334218  | 0.1066843  |
| H | 3.8020355  | -3.4615922 | -2.3276057 |
| H | 6.6752455  | 0.4706458  | -1.1714547 |
| H | 7.5997925  | -1.4774972 | -2.4164927 |
| H | 6.1532725  | -3.4039072 | -2.9786867 |
| C | -1.5472275 | -3.1904632 | 0.4860583  |
| C | 1.0777255  | 4.1441688  | 1.3202753  |
| C | 2.9798365  | 3.7755658  | -0.2939147 |
| C | 3.4036815  | 4.8137187  | 1.9046423  |
| C | 2.5524675  | 3.7801958  | 1.1714113  |
| N | 2.8542645  | 2.4843198  | 1.8475663  |
| O | 2.0861625  | 0.5891938  | 2.8160483  |
| C | 2.1479295  | 1.2979788  | 1.8298673  |
| O | 2.9699065  | -4.8774282 | 0.5734663  |
| C | 1.2672215  | -1.9646982 | -0.7295997 |
| C | 1.5007605  | -3.4738582 | -0.6870147 |
| C | 2.2083135  | -3.9289192 | 0.5709543  |
| C | 1.8680525  | -3.1878592 | 1.7985443  |
| C | 1.0948295  | -2.0946972 | 1.7890723  |
| C | 0.4930995  | -1.5024472 | 0.5368043  |
| C | -1.0037085 | -1.8092152 | 0.5011253  |
| C | -1.7471745 | -0.6727432 | 0.5483633  |
| O | -1.0599355 | 1.6690438  | 0.4884483  |

|    |            |            |            |
|----|------------|------------|------------|
| C  | -0.8066185 | 0.4742098  | 0.5560253  |
| N  | 0.4670685  | -0.0438452 | 0.6049213  |
| C  | 1.6150445  | 0.8118988  | 0.4738233  |
| C  | 2.5577045  | -1.1869842 | -0.7971587 |
| C  | 2.6882685  | 0.0495778  | -0.2264227 |
| N  | 3.9672375  | 0.5253648  | -0.3810927 |
| C  | 4.3998595  | -2.5938183 | -2.0642617 |
| C  | 3.8515435  | -1.5134412 | -1.3522147 |
| C  | 4.7071895  | -0.4209302 | -1.0542747 |
| C  | 6.0502245  | -0.3839472 | -1.4222047 |
| C  | 6.5550625  | -1.4701712 | -2.1151367 |
| C  | 5.7331775  | -2.5620392 | -2.4337167 |
| Au | -3.6309735 | -0.2410812 | -0.3344327 |
| C  | -6.8100765 | 1.5774008  | -2.4881657 |
| C  | -7.4903175 | 0.5293158  | -1.9665927 |
| H  | -7.1319535 | 2.3935518  | -3.1187657 |
| H  | -8.5304685 | 0.2467398  | -2.0423557 |
| C  | -5.3562575 | 0.3522528  | -1.2812787 |
| N  | -6.5833545 | -0.2106792 | -1.2324257 |
| N  | -5.5034195 | 1.4532968  | -2.0555237 |
| C  | -6.9381035 | -1.3964212 | -0.4650697 |
| H  | -6.0343625 | -1.8465832 | -0.0501427 |
| H  | -7.5921045 | -1.1189822 | 0.3661043  |
| H  | -7.4472175 | -2.1118022 | -1.1171347 |
| C  | -4.4336735 | 2.3749868  | -2.3984787 |
| H  | -4.7897945 | 3.4036238  | -2.2946377 |
| H  | -3.5967675 | 2.2159328  | -1.7123707 |

|   |            |            |            |
|---|------------|------------|------------|
| H | -4.0959015 | 2.2074958  | -3.4259107 |
| H | 2.0692075  | -3.8236252 | -1.5515237 |
| B | -4.6954415 | -1.6949992 | 2.5180203  |
| F | -5.4389345 | -0.6051982 | 2.1838403  |
| F | -4.6326235 | -2.6183182 | 1.4968313  |
| F | -4.9257915 | -2.2120513 | 3.7330443  |
| F | -3.1994325 | -1.1524272 | 2.6088353  |
| H | -2.6841745 | -0.8798662 | 1.6386703  |

Zero-point correction= 0.592003 (Hartree/Particle)

Thermal correction to Energy= 0.634056

Thermal correction to Enthalpy= 0.635000

Thermal correction to Gibbs Free Energy= 0.514159

Sum of electronic and zero-point Energies= -2182.471939

Sum of electronic and thermal Energies= -2182.429886

Sum of electronic and thermal Enthalpies= -2182.428942

Sum of electronic and thermal Free Energies= -2182.549784

## C-2

|   |            |            |            |
|---|------------|------------|------------|
| H | -1.6303140 | 1.0471066  | -3.7076397 |
| H | -0.1875420 | 0.5365796  | -4.6139947 |
| H | -1.7328940 | -0.3255364 | -4.8210797 |
| H | 6.3241020  | -2.0486014 | 1.4797473  |
| H | 4.8109950  | -2.1776944 | 2.4015593  |
| H | 4.9336130  | -2.9176424 | 0.7865703  |
| H | 4.8050380  | 1.3720656  | 1.2002913  |
| H | 4.7502310  | 0.3309656  | 2.6525743  |
| H | 6.2497640  | 0.4804766  | 1.7156073  |
| H | 5.0387610  | 0.4014566  | -1.0323807 |

|   |            |            |            |
|---|------------|------------|------------|
| H | 4.9786870  | -1.3687064 | -1.3010867 |
| H | 6.4276650  | -0.6177704 | -0.5906667 |
| H | 2.8364490  | 0.1200886  | 1.0358803  |
| H | -1.0750740 | 1.2886456  | -1.5764807 |
| H | 0.5776180  | 2.4871036  | -2.6723267 |
| H | 3.6179740  | 0.5188836  | -2.8102567 |
| H | 1.9097030  | -1.2343874 | -3.1655877 |
| H | 0.6178470  | -2.3782754 | 0.7313573  |
| H | 1.0838710  | -0.5453144 | 2.9266993  |
| H | -1.1635190 | 3.6015286  | 0.3301083  |
| H | 0.7939950  | 1.7340146  | 4.5607653  |
| H | -0.0930860 | 4.0561646  | 4.4811283  |
| H | -1.0313720 | 4.9832956  | 2.3964223  |
| C | -1.0856240 | 0.1749826  | -4.0960147 |
| C | 5.2307790  | -2.0589604 | 1.3948843  |
| C | 5.1581830  | 0.4288396  | 1.6379633  |
| C | 5.3321880  | -0.5767314 | -0.6326087 |
| C | 4.7543780  | -0.7540794 | 0.7670303  |
| N | 3.2745750  | -0.7378154 | 0.7246243  |
| O | 2.9150630  | -2.6228444 | -0.5210647 |
| C | 2.5046050  | -1.6516814 | 0.0872763  |
| O | 3.1323180  | 2.3772246  | -0.9339767 |
| C | -0.0736890 | 1.0127766  | -1.2428777 |
| C | 0.8360590  | 2.1909046  | -1.6461177 |
| C | 2.2872330  | 1.8051326  | -1.6017587 |
| C | 2.6035370  | 0.6276246  | -2.4326647 |
| C | 1.6802760  | -0.3190554 | -2.6176537 |

|    |            |            |            |
|----|------------|------------|------------|
| C  | 0.3195030  | -0.3249624 | -1.9618667 |
| C  | -0.7339880 | -0.7307724 | -2.9772517 |
| C  | -1.2370070 | -1.9310614 | -2.6615157 |
| O  | -0.9134520 | -3.4064374 | -0.7449397 |
| C  | -0.6424160 | -2.4172564 | -1.4059467 |
| N  | 0.3189170  | -1.4802754 | -1.0622057 |
| C  | 0.9635010  | -1.4636624 | 0.2211533  |
| C  | -0.1039990 | 0.8496216  | 0.2670033  |
| C  | 0.5005780  | -0.2317614 | 0.9263753  |
| N  | 0.7921940  | 0.1108206  | 2.2161293  |
| C  | -0.6979220 | 3.2187496  | 1.2347223  |
| C  | -0.1917480 | 1.9149746  | 1.2652103  |
| C  | 0.3483400  | 1.4077406  | 2.4633133  |
| C  | 0.3852540  | 2.1472226  | 3.6415533  |
| C  | -0.1120950 | 3.4402946  | 3.5853113  |
| C  | -0.6422400 | 3.9684976  | 2.3978683  |
| Au | -2.1131390 | -0.2117554 | 0.6645693  |
| C  | -5.3091650 | -2.9181554 | 1.2941933  |
| C  | -6.0196260 | -1.8796664 | 0.7900313  |
| H  | -5.6161650 | -3.9015234 | 1.6190533  |
| H  | -7.0741450 | -1.7724764 | 0.5817823  |
| C  | -3.8743630 | -1.2381694 | 0.8906203  |
| N  | -5.1246820 | -0.8577634 | 0.5528793  |
| N  | -3.9942670 | -2.5055444 | 1.3491943  |
| C  | -5.4897080 | 0.4300166  | -0.0324417 |
| H  | -6.5482050 | 0.6108336  | 0.1665633  |
| H  | -4.8817010 | 1.2195456  | 0.4116113  |

|   |            |            |            |
|---|------------|------------|------------|
| H | -5.2944460 | 0.4305626  | -1.1069357 |
| C | -2.8837260 | -3.3218774 | 1.8200763  |
| H | -2.3944510 | -2.8259104 | 2.6637903  |
| H | -3.2777850 | -4.2853044 | 2.1517313  |
| H | -2.1621190 | -3.4778314 | 1.0107053  |
| H | 0.6592950  | 3.0546436  | -1.0000917 |
| H | -2.0098320 | -2.4778654 | -3.1890927 |
| B | -3.2852490 | 2.3491376  | -1.4836467 |
| F | -2.2243990 | 3.0639276  | -2.0423157 |
| F | -3.1341080 | 2.3523656  | -0.0720107 |
| F | -3.1823180 | 0.9963786  | -1.9109347 |
| F | -4.5115100 | 2.8539376  | -1.8284997 |

Zero-point correction= 0.598529 (Hartree/Particle)

Thermal correction to Energy= 0.640536

Thermal correction to Enthalpy= 0.641480

Thermal correction to Gibbs Free Energy= 0.524335

Sum of electronic and zero-point Energies= -2182.528924

Sum of electronic and thermal Energies= -2182.486917

Sum of electronic and thermal Enthalpies= -2182.485973

Sum of electronic and thermal Free Energies= -2182.603118

### **D-1**

|    |            |            |            |
|----|------------|------------|------------|
| Au | -4.6178257 | -0.8684025 | 0.1936470  |
| C  | -6.8198677 | -3.4405845 | -2.3182990 |
| C  | -7.8442157 | -3.0359735 | -1.5298990 |
| H  | -6.7940267 | -4.1177605 | -3.1598670 |
| H  | -8.8953637 | -3.2854165 | -1.5420510 |
| C  | -5.9823777 | -2.0130095 | -0.8081100 |



|   |            |            |            |
|---|------------|------------|------------|
| N | -7.3101527 | -2.1568105 | -0.6071360 |
| N | -5.6845677 | -2.8021715 | -1.8619490 |
| C | 6.4696503  | -3.8499405 | -0.1258850 |
| F | 6.8613883  | -3.6214825 | 1.1256300  |
| F | 7.4857013  | -3.5837475 | -0.9394200 |
| F | 6.1631633  | -5.1384865 | -0.2402490 |
| S | 5.0235813  | -2.8010525 | -0.5337040 |
| O | 4.0030953  | -3.2225015 | 0.4355800  |
| O | 4.7311373  | -3.2006125 | -1.9364820 |
| O | 5.5163623  | -1.4274935 | -0.3927240 |
| C | -8.0857697 | -1.4916515 | 0.4252480  |
| H | -7.4274877 | -0.8165845 | 0.9765660  |
| H | -8.8944897 | -0.9123785 | -0.0287780 |
| H | -8.5061367 | -2.2283825 | 1.1156100  |
| C | -4.3546627 | -2.9962125 | -2.4365280 |
| H | -4.4259197 | -2.9435625 | -3.5255400 |
| H | -3.6759577 | -2.2121375 | -2.0863180 |
| H | -3.9626017 | -3.9736615 | -2.1426250 |
| C | 2.5533263  | 6.4986435  | -1.3820240 |
| C | 1.3348143  | 6.5825245  | -2.0733040 |
| C | 0.3378103  | 5.6313625  | -1.8998190 |
| C | 0.6179323  | 4.6065375  | -1.0104100 |
| C | 1.8225693  | 4.4937735  | -0.3044660 |
| C | 2.8120373  | 5.4637035  | -0.4966260 |
| C | 0.4689023  | 2.7922445  | 0.2040750  |
| C | 1.6937123  | 3.3002855  | 0.4857130  |
| C | -0.3060587 | 1.6125755  | 0.6687470  |

|   |            |            |            |
|---|------------|------------|------------|
| N | -0.5996007 | 0.6859025  | -0.4545430 |
| C | -1.7899677 | 0.0457935  | -0.5476350 |
| C | 0.4862523  | 0.2104615  | -1.2737280 |
| O | -2.1237967 | -0.7227215 | -1.4421570 |
| C | -2.7110057 | 0.2559335  | 0.5889580  |
| C | -3.2320847 | 0.3060165  | 1.7066590  |
| C | 1.0739473  | 1.0117945  | -2.2522170 |
| C | 2.1802903  | 0.5468395  | -2.9444720 |
| C | 2.7152833  | -0.7229615 | -2.6751770 |
| C | 2.0850803  | -1.5418405 | -1.7207610 |
| C | 0.9892853  | -1.0681215 | -1.0264290 |
| O | 3.7933993  | -1.1036925 | -3.3494060 |
| H | -1.2734807 | 1.9868375  | 1.0254240  |
| C | 0.2949473  | 0.8521375  | 1.8659080  |
| O | -0.4198067 | 0.6275645  | 2.8408430  |
| N | 1.5741373  | 0.4695705  | 1.7192470  |
| C | 2.3650093  | -0.3793055 | 2.6501370  |
| C | 1.8604283  | -1.8165075 | 2.5792150  |
| C | 3.8017043  | -0.2969445 | 2.1556790  |
| C | 2.2690443  | 0.1760975  | 4.0658980  |
| C | -3.5923267 | 0.5258875  | 3.0956620  |
| H | 3.3099453  | 7.2611645  | -1.5494750 |
| H | 1.1688373  | 7.4077075  | -2.7614750 |
| H | -0.6100757 | 5.6782305  | -2.4278360 |
| H | 3.7608283  | 5.4027405  | 0.0303860  |
| H | 2.4201003  | 2.8765905  | 1.1669150  |
| H | 0.6689123  | 1.9997905  | -2.4617950 |

|   |            |            |            |
|---|------------|------------|------------|
| H | 2.6711743  | 1.1602185  | -3.6952750 |
| H | 2.4833903  | -2.5306205 | -1.5109990 |
| H | 0.5217763  | -1.6890505 | -0.2622130 |
| H | 4.1956153  | -1.9042655 | -2.9237040 |
| H | 1.9801983  | 0.5766815  | 0.7941220  |
| H | 2.0479013  | -2.2447315 | 1.5871370  |
| H | 2.4090403  | -2.4366415 | 3.2983980  |
| H | 0.7917953  | -1.8649195 | 2.8228150  |
| H | 4.4393123  | -0.9686025 | 2.7409010  |
| H | 4.1908173  | 0.7254855  | 2.2574150  |
| H | 3.9039253  | -0.6183165 | 1.1115740  |
| H | 2.9541873  | -0.3849615 | 4.7124610  |
| H | 1.2554913  | 0.0972395  | 4.4669230  |
| H | 2.5716183  | 1.2311095  | 4.0852700  |
| H | -2.6565167 | 0.8052005  | 3.5994480  |
| H | -3.9945007 | -0.3791175 | 3.5597950  |
| H | -4.3239117 | 1.3336785  | 3.1971410  |
| O | -0.2143037 | 3.5750135  | -0.6936340 |

Zero-point correction= 0.593896 (Hartree/Particle)

Thermal correction to Energy= 0.641308

Thermal correction to Enthalpy= 0.642252

Thermal correction to Gibbs Free Energy= 0.504633

Sum of electronic and zero-point Energies= -2739.185740

Sum of electronic and thermal Energies= -2739.138328

Sum of electronic and thermal Enthalpies= -2739.137384

Sum of electronic and thermal Free Energies= -2739.275002

**D-ts1**

|   |            |            |            |
|---|------------|------------|------------|
| H | -1.0496930 | -4.3437971 | 1.0968891  |
| H | -2.7670470 | -4.6001401 | 1.4967841  |
| H | -2.1910520 | -4.8646531 | -0.1698159 |
| H | 0.0937780  | 5.3876199  | -0.8129079 |
| H | 0.3688690  | 3.6657439  | -1.0318469 |
| H | -1.1425880 | 4.2387349  | -0.2639599 |
| H | 2.5874200  | 4.4868759  | 1.8891051  |
| H | 2.5159940  | 3.5753029  | 0.3723441  |
| H | 2.4223020  | 5.3478319  | 0.3432921  |
| H | 0.5621970  | 5.6659779  | 2.7967711  |
| H | -0.9682570 | 5.6400499  | 1.8830951  |
| H | 0.4332110  | 6.5450429  | 1.2668141  |
| H | -0.0049050 | 3.4859019  | 2.8285331  |
| H | 3.5724330  | -4.3480331 | 1.5301101  |
| H | 1.2614330  | -1.4943611 | -1.1640629 |
| H | 2.7638000  | -3.3140381 | -0.3618639 |
| H | 1.1221770  | -2.9361071 | 3.5787521  |
| H | -0.3360970 | -1.0423301 | 2.7871251  |
| H | -0.5150900 | 1.8462809  | -0.4364429 |
| H | 2.7998990  | 0.3851639  | 1.3144701  |
| H | 5.5334080  | 0.1680209  | -0.0046679 |
| H | 3.0390900  | 2.3311239  | -3.7995029 |
| H | 5.4779800  | 1.8006919  | -3.9971999 |
| H | 6.6891100  | 0.7265539  | -2.1372979 |
| C | -2.0791010 | -4.2440661 | 0.7242551  |
| C | -0.0613540 | 4.4054629  | -0.3505969 |
| C | 2.1214950  | 4.4498959  | 0.8973831  |

|    |            |            |            |
|----|------------|------------|------------|
| C  | 0.1246610  | 5.6335579  | 1.7902041  |
| C  | 0.6013210  | 4.3998059  | 1.0239011  |
| N  | 0.1721290  | 3.2520619  | 1.8576221  |
| O  | -0.6110380 | 1.2848859  | 2.5855451  |
| C  | -0.1348070 | 1.9379449  | 1.6697551  |
| O  | 2.8021510  | -4.1983611 | 2.1442771  |
| C  | 1.2202690  | -1.8279501 | -0.1272689 |
| C  | 2.0479050  | -2.8461931 | 0.3087841  |
| C  | 2.0208200  | -3.2429201 | 1.6592251  |
| C  | 1.1197860  | -2.6211891 | 2.5381641  |
| C  | 0.3134590  | -1.5819521 | 2.1024301  |
| C  | 0.3642720  | -1.1823091 | 0.7668681  |
| C  | -2.2787300 | -2.8374071 | 0.4299201  |
| C  | -2.2127230 | -1.6202101 | 0.2454541  |
| O  | -2.5691580 | 0.6818479  | -0.1333929 |
| C  | -1.7711150 | -0.2145711 | 0.1289311  |
| N  | -0.4435700 | -0.0807061 | 0.3109651  |
| C  | 0.0941410  | 1.2941229  | 0.2887531  |
| C  | 2.6639670  | 0.8409429  | 0.3393831  |
| C  | 1.5020490  | 1.3019969  | -0.1849819 |
| C  | 5.0125270  | 0.6753559  | -0.8130069 |
| C  | 3.6542070  | 0.9892429  | -0.6903159 |
| C  | 2.9830110  | 1.5627929  | -1.7788479 |
| C  | 3.5951740  | 1.8827719  | -2.9811199 |
| C  | 4.9471420  | 1.5804079  | -3.0737389 |
| C  | 5.6399420  | 0.9790189  | -2.0107949 |
| Au | -4.3670280 | -1.8585261 | -0.1957349 |

|   |            |            |            |
|---|------------|------------|------------|
| C | -8.0302640 | -0.0029561 | -1.1669189 |
| C | -8.4513480 | -1.2873181 | -1.2500519 |
| H | -8.5542920 | 0.9291479  | -1.3219129 |
| H | -9.4165670 | -1.7072781 | -1.4936499 |
| C | -6.2787500 | -1.3175341 | -0.6893199 |
| N | -7.3599650 | -2.0819311 | -0.9533969 |
| N | -6.6935140 | -0.0398421 | -0.8224269 |
| C | 5.9912020  | -2.7881031 | -1.2380169 |
| F | 6.8395010  | -1.7677901 | -1.3832849 |
| F | 4.8430900  | -2.4586851 | -1.8348699 |
| F | 6.4994680  | -3.8405401 | -1.8682209 |
| S | 5.7218530  | -3.1397411 | 0.5416871  |
| O | 7.0603200  | -3.4086551 | 1.0526851  |
| O | 4.8246000  | -4.3280701 | 0.4571901  |
| O | 5.0460680  | -1.9280741 | 1.0282071  |
| C | -7.3912260 | -3.5344021 | -0.9378889 |
| H | -6.3936500 | -3.9031801 | -0.6893429 |
| H | -8.1023900 | -3.8879821 | -0.1861789 |
| H | -7.6788550 | -3.9147021 | -1.9219499 |
| C | -5.8748110 | 1.1521369  | -0.6167809 |
| H | -6.2187110 | 1.6856249  | 0.2735651  |
| H | -4.8236350 | 0.8729789  | -0.4844509 |
| H | -5.9625970 | 1.8035379  | -1.4901249 |
| O | 1.6642970  | 1.7441439  | -1.4810879 |

Zero-point correction= 0.593746 (Hartree/Particle)

Thermal correction to Energy= 0.640315

Thermal correction to Enthalpy= 0.641260

Thermal correction to Gibbs Free Energy= 0.506163

Sum of electronic and zero-point Energies= -2739.178826

Sum of electronic and thermal Energies= -2739.132257

Sum of electronic and thermal Enthalpies= -2739.131313

Sum of electronic and thermal Free Energies= -2739.266409

**D-int1**

|   |            |            |            |
|---|------------|------------|------------|
| H | 0.6808907  | -3.9309192 | -0.5334307 |
| H | 1.1466017  | -3.6159762 | -2.2028277 |
| H | 2.4023047  | -3.7979002 | -0.9574807 |
| H | 0.3521897  | 5.4329018  | 0.6131553  |
| H | 0.0138957  | 3.7430588  | 0.9473233  |
| H | 1.2092347  | 4.1763298  | -0.3035667 |
| H | -3.0282703 | 4.6845858  | -0.9777367 |
| H | -2.4252603 | 3.6771838  | 0.3523403  |
| H | -2.2830733 | 5.4451348  | 0.4454503  |
| H | -1.4152583 | 5.8936638  | -2.5150497 |
| H | 0.3368147  | 5.7938148  | -2.2088517 |
| H | -0.7234923 | 6.6832648  | -1.0908407 |
| H | -1.1472273 | 3.6890238  | -2.8206427 |
| H | -3.9584253 | -3.6433372 | -1.7445637 |
| H | -0.7917783 | -1.4891992 | 0.8804963  |
| H | -2.7054933 | -2.8362152 | 0.0505703  |
| H | -1.4756923 | -2.0889622 | -4.0379627 |
| H | 0.4343367  | -0.6963952 | -3.2161947 |
| H | 0.4280497  | 2.0851688  | 0.0177103  |
| H | -3.1462453 | 0.7421148  | -1.0193327 |
| H | -5.4880443 | 0.1562318  | 0.8892983  |

|   |            |            |            |
|---|------------|------------|------------|
| H | -1.9387143 | 1.1399908  | 4.3080793  |
| H | -4.2739353 | 0.5598678  | 5.0057103  |
| H | -6.0058773 | 0.0749418  | 3.3195193  |
| C | 1.4055957  | -3.3935032 | -1.1592657 |
| C | 0.2449097  | 4.4487088  | 0.1422343  |
| C | -2.2302933 | 4.5836808  | -0.2321447 |
| C | -0.6506733 | 5.7984238  | -1.7325457 |
| C | -0.8615503 | 4.5296318  | -0.9077787 |
| N | -0.8163433 | 3.4273128  | -1.8974407 |
| O | -0.7930193 | 1.4035598  | -2.8668357 |
| C | -0.6345513 | 2.0785318  | -1.8577747 |
| O | -3.1005713 | -3.3041882 | -2.5193347 |
| C | -0.9473303 | -1.6602912 | -0.1853847 |
| C | -1.9729243 | -2.4074582 | -0.6286277 |
| C | -2.1651263 | -2.5991542 | -2.0549527 |
| C | -1.2595853 | -1.9638002 | -2.9808967 |
| C | -0.2427093 | -1.2045542 | -2.5360647 |
| C | 0.0980577  | -1.0963802 | -1.0895867 |
| C | 1.4007457  | -1.9333352 | -0.8845277 |
| C | 2.4085917  | -1.1505312 | -0.4680527 |
| O | 2.4857897  | 1.2344228  | 0.0339213  |
| C | 1.8941807  | 0.2315858  | -0.3349717 |
| N | 0.5518607  | 0.2248418  | -0.7032777 |
| C | -0.2469553 | 1.4242928  | -0.5357477 |
| C | -2.7467733 | 0.8833238  | -0.0211207 |
| C | -1.4652503 | 1.2015798  | 0.2872363  |
| C | -4.7297393 | 0.3913818  | 1.6312483  |



|    |            |            |            |
|----|------------|------------|------------|
| C  | -3.4294723 | 0.7224028  | 1.2337153  |
| C  | -2.4639713 | 0.9762478  | 2.2192693  |
| C  | -2.7187633 | 0.9335128  | 3.5810613  |
| C  | -4.0178773 | 0.6106788  | 3.9500123  |
| C  | -5.0046203 | 0.3402638  | 2.9892183  |
| Au | 4.3729597  | -1.4736302 | 0.0201883  |
| C  | 8.3995417  | -0.8754762 | 1.3096673  |
| C  | 8.4884217  | -2.2026942 | 1.0585193  |
| H  | 9.1332627  | -0.1691082 | 1.6708203  |
| H  | 9.3147537  | -2.8922692 | 1.1550563  |
| C  | 6.3781157  | -1.5613662 | 0.5781443  |
| N  | 7.2419887  | -2.6031632 | 0.6119853  |
| N  | 7.1029657  | -0.5013182 | 1.0102313  |
| C  | -5.9251953 | -2.9713522 | 1.1106033  |
| F  | -6.7440313 | -2.0381312 | 1.5833463  |
| F  | -4.7359493 | -2.8305452 | 1.6870223  |
| F  | -6.4111253 | -4.1632072 | 1.4103433  |
| S  | -5.7855273 | -2.7694982 | -0.7070577 |
| O  | -7.1262803 | -2.9717832 | -1.2158657 |
| O  | -4.8367403 | -3.9342642 | -1.0047657 |
| O  | -5.1197643 | -1.4854792 | -0.9100757 |
| C  | 6.9080717  | -3.9627872 | 0.2313513  |
| H  | 5.8609867  | -3.9831042 | -0.0801777 |
| H  | 7.5385647  | -4.2899902 | -0.6008557 |
| H  | 7.0452357  | -4.6395922 | 1.0800443  |
| C  | 6.5936797  | 0.8548398  | 1.1466003  |
| H  | 7.1658587  | 1.5354858  | 0.5093883  |

|   |            |           |           |
|---|------------|-----------|-----------|
| H | 5.5433797  | 0.8740538 | 0.8403483 |
| H | 6.6693857  | 1.1804958 | 2.1882123 |
| O | -1.2617203 | 1.2643268 | 1.6441703 |

Zero-point correction= 0.594241 (Hartree/Particle)

Thermal correction to Energy= 0.639891

Thermal correction to Enthalpy= 0.640835

Thermal correction to Gibbs Free Energy= 0.508911

Sum of electronic and zero-point Energies= -2739.224066

Sum of electronic and thermal Energies= -2739.178416

Sum of electronic and thermal Enthalpies= -2739.177471

Sum of electronic and thermal Free Energies= -2739.309395

### **D-ts2**

|   |            |            |            |
|---|------------|------------|------------|
| H | -0.5178012 | -2.4383729 | -1.8102706 |
| H | -0.0511112 | -1.3434939 | -3.1044696 |
| H | 1.1891688  | -2.3375699 | -2.2991906 |
| H | 3.2087168  | 3.4472261  | -1.9527546 |
| H | 1.9283988  | 2.3035641  | -1.5110516 |
| H | 1.6682538  | 3.4653851  | -2.8329256 |
| H | 1.8107318  | 4.9277381  | 1.2220434  |
| H | 2.2806918  | 3.2316681  | 0.8970854  |
| H | 3.3246188  | 4.5490381  | 0.3827824  |
| H | 1.4880898  | 6.5331881  | -0.7287736 |
| H | 1.3366088  | 5.8968651  | -2.3878796 |
| H | 2.9135198  | 5.9079481  | -1.5832596 |
| H | -0.3999782 | 5.0160741  | -1.2096236 |
| H | -4.2810692 | -1.6085499 | -2.7319276 |
| H | -1.3460002 | -0.8456889 | 0.7114714  |

|   |            |            |            |
|---|------------|------------|------------|
| H | -3.3208582 | -1.6489329 | -0.5800476 |
| H | -2.3531672 | 1.1515001  | -3.6932146 |
| H | -0.3092272 | 1.9056041  | -2.4804746 |
| H | 0.4027928  | 2.6110261  | 1.5868994  |
| H | -3.0752642 | 1.6189261  | -0.0256496 |
| H | -5.1372062 | -0.4660059 | 1.0703364  |
| H | -2.1868502 | 0.1640921  | 5.1040274  |
| H | -4.3008752 | -1.1860909 | 5.2457304  |
| H | -5.7263532 | -1.4965919 | 3.2530574  |
| C | 0.2747838  | -1.7559679 | -2.1416416 |
| C | 2.1238388  | 3.3280181  | -1.8438246 |
| C | 2.2755528  | 4.2499941  | 0.4949184  |
| C | 1.8404828  | 5.7597491  | -1.4219956 |
| C | 1.5839668  | 4.3624751  | -0.8595686 |
| N | 0.1059928  | 4.2704671  | -0.7423986 |
| O | -1.9587852 | 3.8897181  | 0.0544524  |
| C | -0.7789452 | 3.5659691  | 0.0109434  |
| O | -3.7167152 | -0.8670169 | -3.1208306 |
| C | -1.7003442 | -0.2282009 | -0.1236716 |
| C | -2.6681032 | -0.8755119 | -0.9752996 |
| C | -2.8580432 | -0.3990929 | -2.2511326 |
| C | -2.0435092 | 0.7067971  | -2.7506346 |
| C | -0.9497602 | 1.1151851  | -2.0939356 |
| C | -0.5063602 | 0.4172181  | -0.8437706 |
| C | 0.5352578  | -0.6904679 | -1.1396096 |
| C | 1.6236898  | -0.5649929 | -0.3531696 |
| O | 2.1118598  | 1.0522961  | 1.4099414  |

|    |            |            |            |
|----|------------|------------|------------|
| C  | 1.4311688  | 0.6243041  | 0.4921574  |
| N  | 0.2667538  | 1.2724911  | 0.0452384  |
| C  | -0.3345082 | 2.3404621  | 0.8173554  |
| C  | -2.5884652 | 1.0703071  | 0.7777064  |
| C  | -1.5144082 | 1.7067201  | 1.4585694  |
| C  | -4.4996702 | -0.3325259 | 1.9450014  |
| C  | -3.3263862 | 0.4081191  | 1.8695094  |
| C  | -2.5425602 | 0.5534111  | 3.0098234  |
| C  | -2.8336302 | 0.0159611  | 4.2451274  |
| C  | -4.0107782 | -0.7282619 | 4.3035054  |
| C  | -4.8224352 | -0.8976379 | 3.1775624  |
| Au | 3.3039528  | -1.7166669 | -0.1147916 |
| C  | 6.9785458  | -3.4964829 | 1.1707314  |
| C  | 6.6795138  | -4.3649549 | 0.1765834  |
| H  | 7.8128358  | -3.4595819 | 1.8565164  |
| H  | 7.1988418  | -5.2414019 | -0.1836826 |
| C  | 5.0350748  | -2.8201299 | 0.2436604  |
| N  | 5.4879228  | -3.9343589 | -0.3780426 |
| N  | 5.9621438  | -2.5593949 | 1.1963504  |
| C  | -5.9344342 | -3.3016889 | 0.3220054  |
| F  | -6.7639332 | -2.9036249 | 1.2882434  |
| F  | -4.6837262 | -3.1382769 | 0.7739314  |
| F  | -6.1281392 | -4.5923239 | 0.1020094  |
| S  | -6.2124392 | -2.3104299 | -1.1994206 |
| O  | -7.5551002 | -2.6777309 | -1.6195936 |
| O  | -5.1032972 | -2.7992259 | -2.0702876 |
| O  | -5.9942372 | -0.9287309 | -0.7454416 |

|   |            |            |            |
|---|------------|------------|------------|
| C | 4.8140038  | -4.5982449 | -1.4791116 |
| H | 3.8967638  | -4.0478159 | -1.7026076 |
| H | 5.4545238  | -4.6074829 | -2.3660346 |
| H | 4.5586848  | -5.6255829 | -1.2030086 |
| C | 5.9018268  | -1.4472169 | 2.1304284  |
| H | 6.7762248  | -0.8019269 | 2.0044684  |
| H | 4.9955118  | -0.8686109 | 1.9302674  |
| H | 5.8695668  | -1.8203759 | 3.1582824  |
| O | -1.4164052 | 1.3337331  | 2.7162924  |

Zero-point correction= 0.596145 (Hartree/Particle)

Thermal correction to Energy= 0.640833

Thermal correction to Enthalpy= 0.641777

Thermal correction to Gibbs Free Energy= 0.513669

Sum of electronic and zero-point Energies= -2739.187928

Sum of electronic and thermal Energies= -2739.143241

Sum of electronic and thermal Enthalpies= -2739.142296

Sum of electronic and thermal Free Energies= -2739.270404

### **D-int2**

|   |            |            |            |
|---|------------|------------|------------|
| H | -0.4509756 | -2.5651161 | -1.5806060 |
| H | -0.0120516 | -1.5451411 | -2.9418330 |
| H | 1.2516534  | -2.4704961 | -2.0894790 |
| H | 3.1979384  | 3.3114319  | -2.1381480 |
| H | 1.9304474  | 2.2039639  | -1.5857280 |
| H | 1.6291144  | 3.2859379  | -2.9661200 |
| H | 1.9127784  | 4.9878189  | 0.9867170  |
| H | 2.3196384  | 3.2600199  | 0.7597040  |
| H | 3.3939664  | 4.5065559  | 0.1410930  |

|   |            |            |            |
|---|------------|------------|------------|
| H | 1.5558404  | 6.4772599  | -1.0385460 |
| H | 1.3527824  | 5.7501489  | -2.6549130 |
| H | 2.9494624  | 5.7829589  | -1.8903530 |
| H | -0.3643996 | 5.0001729  | -1.3296640 |
| H | -4.1360776 | -1.8634111 | -2.6640320 |
| H | -1.3316856 | -0.8046991 | 0.8071500  |
| H | -3.2372406 | -1.7563111 | -0.4785970 |
| H | -2.2811946 | 0.9094809  | -3.7089660 |
| H | -0.2755006 | 1.7694109  | -2.5072540 |
| H | 0.4263314  | 2.6411859  | 1.5510850  |
| H | -2.9463896 | 1.6045169  | -0.2238080 |
| H | -5.1318706 | -0.4076261 | 0.8388510  |
| H | -2.7571286 | 0.9429979  | 5.0739550  |
| H | -4.9068366 | -0.3597061 | 5.1494620  |
| H | -6.0462886 | -1.0147431 | 3.0629150  |
| C | 0.3295804  | -1.8937091 | -1.9595330 |
| C | 2.1169664  | 3.2053379  | -1.9863450 |
| C | 2.3385964  | 4.2510339  | 0.2939710  |
| C | 1.8789034  | 5.6603789  | -1.6954700 |
| C | 1.6185424  | 4.3011289  | -1.0489820 |
| N | 0.1411824  | 4.2405769  | -0.8843770 |
| O | -1.8730046 | 3.9535789  | 0.0799680  |
| C | -0.7080676 | 3.5887109  | -0.0554900 |
| O | -3.5918346 | -1.1311441 | -3.0817630 |
| C | -1.6864236 | -0.2192931 | -0.0532260 |
| C | -2.6151136 | -0.9734631 | -0.9039530 |
| C | -2.7771066 | -0.5865261 | -2.2029870 |

|    |            |            |            |
|----|------------|------------|------------|
| C  | -1.9775826 | 0.5162459  | -2.7414210 |
| C  | -0.9026976 | 0.9830599  | -2.0917520 |
| C  | -0.4631036 | 0.3484369  | -0.8021780 |
| C  | 0.5792124  | -0.7660221 | -1.0246670 |
| C  | 1.6705764  | -0.5919051 | -0.2491630 |
| O  | 2.1545854  | 1.1279399  | 1.4159300  |
| C  | 1.4753964  | 0.6399219  | 0.5267860  |
| N  | 0.3002104  | 1.2537479  | 0.0529230  |
| C  | -0.2879156 | 2.3636169  | 0.7606330  |
| C  | -2.5262106 | 1.0652099  | 0.6286440  |
| C  | -1.5313056 | 1.8126579  | 1.3632510  |
| C  | -4.6110796 | -0.1181451 | 1.7536410  |
| C  | -3.4202536 | 0.5942429  | 1.7177480  |
| C  | -2.8084946 | 0.9419979  | 2.9149620  |
| C  | -3.2792706 | 0.6396099  | 4.1722830  |
| C  | -4.4731526 | -0.0814841 | 4.1925180  |
| C  | -5.1201076 | -0.4489671 | 3.0103040  |
| Au | 3.3517974  | -1.7330481 | 0.0309340  |
| C  | 7.0269134  | -3.5185221 | 1.3185390  |
| C  | 6.7030754  | -4.4070861 | 0.3502830  |
| H  | 7.8714584  | -3.4751421 | 1.9912500  |
| H  | 7.2066324  | -5.2982751 | 0.0040570  |
| C  | 5.0781374  | -2.8408731 | 0.4028880  |
| N  | 5.5088644  | -3.9754351 | -0.1977990 |
| N  | 6.0221854  | -2.5686671 | 1.3354440  |
| C  | -5.8680416 | -3.4094971 | 0.4754100  |
| F  | -6.8109496 | -3.0206881 | 1.3340500  |

|   |            |            |            |
|---|------------|------------|------------|
| F | -4.6819456 | -3.0701141 | 1.0015960  |
| F | -5.9088676 | -4.7287521 | 0.3699810  |
| S | -6.1157476 | -2.5966461 | -1.1520160 |
| O | -7.3905146 | -3.1217881 | -1.6161500 |
| O | -4.9121446 | -3.0648521 | -1.8966760 |
| O | -6.0532006 | -1.1645101 | -0.8224020 |
| C | 4.8118094  | -4.6581781 | -1.2728290 |
| H | 3.9004904  | -4.0998591 | -1.5011890 |
| H | 5.4418534  | -4.7012351 | -2.1662140 |
| H | 4.5439274  | -5.6735621 | -0.9661460 |
| C | 5.9881484  | -1.4337141 | 2.2424940  |
| H | 6.8713254  | -0.8055461 | 2.0932160  |
| H | 5.0892434  | -0.8464071 | 2.0352150  |
| H | 5.9591384  | -1.7808051 | 3.2795690  |
| O | -1.6269326 | 1.6698159  | 2.6513580  |

Zero-point correction= 0.596246 (Hartree/Particle)

Thermal correction to Energy= 0.641539

Thermal correction to Enthalpy= 0.642483

Thermal correction to Gibbs Free Energy= 0.511940

Sum of electronic and zero-point Energies= -2739.188014

Sum of electronic and thermal Energies= -2739.142721

Sum of electronic and thermal Enthalpies= -2739.141777

Sum of electronic and thermal Free Energies= -2739.272320

### **D-ts3**

|   |            |            |           |
|---|------------|------------|-----------|
| H | 0.3368452  | -3.4229941 | 0.8044672 |
| H | -0.2658198 | -3.0986251 | 2.4236162 |
| H | -1.3840078 | -3.6885171 | 1.1691612 |



|   |            |            |            |
|---|------------|------------|------------|
| H | -2.9857258 | 4.9810849  | 0.0724672  |
| H | -2.4072038 | 3.3177079  | 0.2622752  |
| H | -2.6763198 | 4.3303649  | 1.6945232  |
| H | 0.6571792  | 5.3262649  | -0.8515328 |
| H | -0.4385208 | 4.0386479  | -1.3832998 |
| H | -0.9943528 | 5.7088799  | -1.3911438 |
| H | 0.1325322  | 6.7170359  | 1.1824412  |
| H | -1.2275008 | 6.2699559  | 2.2471182  |
| H | -1.5417058 | 6.9513109  | 0.6430302  |
| H | 0.3512932  | 4.5597769  | 2.2919322  |
| H | 4.6242812  | -1.9274661 | 2.2558352  |
| H | 1.1002202  | -1.6089551 | -0.6000808 |
| H | 3.4710212  | -1.7632241 | 0.2829172  |
| H | 1.8974132  | -0.8110991 | 4.1688912  |
| H | -0.2279738 | -0.0259651 | 3.1701722  |
| H | -0.6671218 | 2.3514349  | -0.4079468 |
| H | 2.8070342  | 0.3281569  | 0.5067892  |
| H | 4.0775962  | -1.3211431 | -1.8709438 |
| H | 3.6857472  | 3.5601119  | -3.0378658 |
| H | 5.4415322  | 2.1057709  | -4.0894408 |
| H | 5.6182722  | -0.2839581 | -3.4822998 |
| C | -0.5283758 | -3.0328671 | 1.3594162  |
| C | -2.3181648 | 4.3367299  | 0.6581402  |
| C | -0.3844998 | 4.9856979  | -0.8367968 |
| C | -0.8772738 | 6.2886499  | 1.2072912  |
| C | -0.8964418 | 4.8884459  | 0.5988772  |
| N | 0.0207292  | 4.0934959  | 1.4532832  |

|    |            |            |            |
|----|------------|------------|------------|
| O  | 1.0590012  | 2.3210219  | 2.3824202  |
| C  | 0.3965392  | 2.7929409  | 1.4727502  |
| O  | 3.8881932  | -1.6953041 | 2.8958112  |
| C  | 1.4235702  | -0.8820341 | 0.1581112  |
| C  | 2.6868192  | -1.3114511 | 0.8892282  |
| C  | 2.7969112  | -1.3386751 | 2.2617082  |
| C  | 1.7124852  | -0.8662211 | 3.0996802  |
| C  | 0.5701842  | -0.4360051 | 2.5541202  |
| C  | 0.2181012  | -0.5564591 | 1.0946212  |
| C  | -0.8537728 | -1.6374571 | 0.9654002  |
| C  | -2.0114208 | -1.1502171 | 0.4779032  |
| O  | -2.5670378 | 1.0970729  | -0.2998658 |
| C  | -1.8087888 | 0.2886349  | 0.2188412  |
| N  | -0.5266108 | 0.6255029  | 0.6565952  |
| C  | 0.0593632  | 1.8817449  | 0.2690632  |
| C  | 1.9913392  | 0.3744309  | -0.4725818 |
| C  | 1.3072642  | 1.6018099  | -0.4669588 |
| C  | 3.9630622  | -0.2695681 | -2.1349878 |
| C  | 2.9826502  | 0.5352749  | -1.5662138 |
| C  | 2.9239572  | 1.8846649  | -1.9109648 |
| C  | 3.7704762  | 2.5029489  | -2.8065548 |
| C  | 4.7377102  | 1.6800669  | -3.3791088 |
| C  | 4.8315742  | 0.3252189  | -3.0463498 |
| Au | -3.8109798 | -2.0063301 | 0.0035532  |
| C  | -7.7939188 | -2.7953901 | -1.3486388 |
| C  | -7.4903698 | -4.0418071 | -0.9169468 |
| H  | -8.6915788 | -2.3977251 | -1.8000868 |

|   |            |            |            |
|---|------------|------------|------------|
| H | -8.0680968 | -4.9549851 | -0.9141018 |
| C | -5.6873738 | -2.7363681 | -0.5392968 |
| N | -6.1986998 | -3.9850861 | -0.4257558 |
| N | -6.6802148 | -2.0117301 | -1.1095028 |
| C | 7.0249022  | -4.0744771 | 0.0279672  |
| F | 7.2135202  | -4.6699211 | -1.1444358 |
| F | 6.4176492  | -4.9298211 | 0.8445722  |
| F | 8.2076132  | -3.7633791 | 0.5432262  |
| S | 6.0030632  | -2.5696201 | -0.1907158 |
| O | 6.7823842  | -1.7141351 | -1.0820138 |
| O | 5.8695212  | -2.0639251 | 1.2002212  |
| O | 4.7405942  | -3.0936711 | -0.7464078 |
| C | -5.4881338 | -5.1192421 | 0.1355202  |
| H | -4.4931948 | -4.7841161 | 0.4387632  |
| H | -6.0204788 | -5.5060311 | 1.0096362  |
| H | -5.3891068 | -5.9126131 | -0.6113358 |
| C | -6.5933468 | -0.5971391 | -1.4333728 |
| H | -5.6074978 | -0.2274821 | -1.1363448 |
| H | -6.7232028 | -0.4489881 | -2.5095308 |
| H | -7.3643278 | -0.0396891 | -0.8931908 |
| O | 1.8890142  | 2.5210189  | -1.2157418 |

Zero-point correction= 0.592209 (Hartree/Particle)

Thermal correction to Energy= 0.637373

Thermal correction to Enthalpy= 0.638317

Thermal correction to Gibbs Free Energy= 0.506882

Sum of electronic and zero-point Energies= -2739.150070

Sum of electronic and thermal Energies= -2739.104907

Sum of electronic and thermal Enthalpies= -2739.103963

Sum of electronic and thermal Free Energies= -2739.235398

**D-int3**

|   |            |            |            |
|---|------------|------------|------------|
| H | 0.2422454  | -3.5789029 | -0.0459483 |
| H | 0.3574874  | -3.2404629 | 1.6880917  |
| H | -1.1963306 | -3.7233599 | 0.9686207  |
| H | -2.9695186 | 4.9773591  | -0.9564093 |
| H | -2.5131286 | 3.3203161  | -0.4861723 |
| H | -3.1687686 | 4.4277751  | 0.7214767  |
| H | 0.7739784  | 5.2771521  | -0.8027913 |
| H | -0.1818966 | 4.0351871  | -1.6212923 |
| H | -0.6638606 | 5.7248301  | -1.7560613 |
| H | -0.2619146 | 6.7092351  | 1.0057107  |
| H | -1.8651206 | 6.2942251  | 1.6682877  |
| H | -1.7280056 | 6.9674431  | 0.0362637  |
| H | -0.5175936 | 4.5131321  | 2.1695177  |
| H | 5.4285914  | -2.2532659 | 1.1908377  |
| H | 1.1466174  | -1.0321779 | -1.3278793 |
| H | 2.1565924  | -2.6892199 | 0.1533157  |
| H | 2.4024834  | -0.7404339 | 3.4832697  |
| H | 0.1331374  | -0.0827689 | 2.7533057  |
| H | -0.6295176 | 2.3369101  | -0.7170643 |
| H | 4.8188444  | -0.4985509 | -1.3174673 |
| H | 4.3397274  | 4.4873201  | -1.0142773 |
| H | 6.5273484  | 3.4250481  | -1.6293883 |
| H | 6.7235674  | 0.9671021  | -1.7660973 |
| C | -0.2889196 | -3.1318279 | 0.8069237  |

|   |            |            |            |
|---|------------|------------|------------|
| C | -2.5210866 | 4.3673551  | -0.1617163 |
| C | -0.2452616 | 4.9784441  | -1.0700543 |
| C | -1.2490296 | 6.2987561  | 0.7596517  |
| C | -1.1276506 | 4.8937141  | 0.1736767  |
| N | -0.5059426 | 4.0861361  | 1.2494167  |
| O | 0.1332424  | 2.2950271  | 2.4486787  |
| C | -0.1477246 | 2.7794541  | 1.3624437  |
| O | 4.2166034  | -1.6266909 | 1.8910567  |
| C | 1.5476724  | -0.6758179 | -0.3659383 |
| C | 2.5903334  | -1.6802759 | 0.1253247  |
| C | 3.0650224  | -1.3818469 | 1.5180147  |
| C | 2.0851764  | -0.8470739 | 2.4488687  |
| C | 0.8560274  | -0.4808429 | 2.0451057  |
| C | 0.3638734  | -0.5745509 | 0.6259537  |
| C | -0.6600976 | -1.7129959 | 0.5450287  |
| C | -1.8897326 | -1.2527149 | 0.2428607  |
| O | -2.6550376 | 1.0063401  | -0.2821063 |
| C | -1.7857566 | 0.2103741  | 0.0511847  |
| N | -0.4759046 | 0.5708611  | 0.2988537  |
| C | -0.0124016 | 1.9194551  | 0.0904857  |
| C | 2.1338304  | 0.6999231  | -0.5379473 |
| C | 1.4135924  | 1.8254921  | -0.3164883 |
| C | 4.6903294  | 0.5778191  | -1.2346323 |
| C | 3.4631134  | 1.1596991  | -0.8852863 |
| C | 3.3922264  | 2.5611991  | -0.8228593 |
| C | 4.4550124  | 3.4092511  | -1.0802623 |
| C | 5.6587204  | 2.8058791  | -1.4194073 |

|    |            |            |            |
|----|------------|------------|------------|
| C  | 5.7688484  | 1.4111351  | -1.4951993 |
| Au | -3.7270746 | -2.1159479 | -0.0240713 |
| C  | -7.8870636 | -2.6993809 | -0.8109863 |
| C  | -7.5718886 | -3.9899969 | -0.5516333 |
| H  | -8.8264336 | -2.2362469 | -1.0772243 |
| H  | -8.1787466 | -4.8840819 | -0.5449803 |
| C  | -5.6812446 | -2.7740869 | -0.3377153 |
| N  | -6.2189566 | -4.0146429 | -0.2645163 |
| N  | -6.7195676 | -1.9714359 | -0.6754153 |
| C  | 5.2048404  | -4.9589279 | 0.0859157  |
| F  | 4.9430234  | -5.7094589 | -0.9686173 |
| F  | 4.0608404  | -4.5448519 | 0.6245337  |
| F  | 5.8762674  | -5.6602199 | 0.9770107  |
| S  | 6.1771214  | -3.4938639 | -0.4448263 |
| O  | 7.4819144  | -3.9668179 | -0.8303793 |
| O  | 6.2905944  | -2.7335759 | 0.9126457  |
| O  | 5.3111334  | -2.7888709 | -1.3744023 |
| C  | -5.4761226 | -5.2144499 | 0.0717957  |
| H  | -4.4341726 | -4.9337119 | 0.2436407  |
| H  | -5.8814886 | -5.6707179 | 0.9799847  |
| H  | -5.5249786 | -5.9348249 | -0.7503593 |
| C  | -6.6277736 | -0.5326159 | -0.8701823 |
| H  | -7.2790996 | -0.0157999 | -0.1591773 |
| H  | -5.5933766 | -0.2160559 | -0.7048093 |
| H  | -6.9238676 | -0.2730269 | -1.8908543 |
| H  | 3.4464734  | -1.7490799 | -0.5505963 |
| O  | 2.1356004  | 2.9671201  | -0.4742643 |

Zero-point correction= 0.598321 (Hartree/Particle)

Thermal correction to Energy= 0.643398

Thermal correction to Enthalpy= 0.644342

Thermal correction to Gibbs Free Energy= 0.514251

Sum of electronic and zero-point Energies= -2739.246888

Sum of electronic and thermal Energies= -2739.201811

Sum of electronic and thermal Enthalpies= -2739.200867

Sum of electronic and thermal Free Energies= -2739.330958

#### **D-int4**

|   |            |            |            |
|---|------------|------------|------------|
| H | 1.1383371  | 0.5660614  | -3.6503074 |
| H | 1.1909301  | 2.0150614  | -2.6346084 |
| H | 2.5927951  | 0.9220804  | -2.7080114 |
| H | -2.9655179 | 0.9419684  | 5.7312996  |
| H | -2.6982709 | -0.7058606 | 5.1182656  |
| H | -1.5934979 | 0.6064244  | 4.6468426  |
| H | -5.6213989 | 0.4911454  | 3.1129646  |
| H | -5.0391669 | -0.7878286 | 4.2118506  |
| H | -5.3346319 | 0.8501094  | 4.8254876  |
| H | -4.0921429 | 2.3741284  | 2.4432186  |
| H | -2.4276319 | 2.4461354  | 3.0694866  |
| H | -3.8023529 | 2.7589524  | 4.1552976  |
| H | -3.8172499 | -0.7172436 | 2.0597926  |
| H | -1.0692239 | -0.9675846 | -2.8342834 |
| H | -0.9144159 | 1.2941894  | -3.7392024 |
| H | -1.7820719 | 3.4968454  | -0.7092214 |
| H | -0.2737299 | 1.8412204  | 0.3449276  |
| H | -1.5697359 | -2.0307186 | 1.1253196  |

|   |            |            |            |
|---|------------|------------|------------|
| H | -4.2042709 | -0.4566846 | -4.2374544 |
| H | -6.7096869 | -2.1351476 | -0.2312214 |
| H | -7.8363269 | -1.9058246 | -2.4586744 |
| H | -6.5778169 | -1.0810256 | -4.4146544 |
| C | 1.4987341  | 0.9614134  | -2.6899554 |
| C | -2.6364459 | 0.3586904  | 4.8623136  |
| C | -4.9642079 | 0.2795014  | 3.9667236  |
| C | -3.4543589 | 2.1546974  | 3.3083136  |
| C | -3.5243929 | 0.6716614  | 3.6623086  |
| N | -3.1095579 | -0.1434736 | 2.5025576  |
| O | -0.9738839 | 0.6326424  | 2.2855326  |
| C | -1.8967979 | -0.0700766 | 1.9080686  |
| O | -3.1054499 | 3.0230624  | -2.9104634 |
| C | -1.5217799 | -0.1526156 | -2.2454854 |
| C | -1.8203959 | 1.0233314  | -3.1800004 |
| C | -2.2738669 | 2.2659104  | -2.4457544 |
| C | -1.5901209 | 2.5295794  | -1.1696374 |
| C | -0.7770469 | 1.6311264  | -0.5994774 |
| C | -0.5066759 | 0.2478934  | -1.1429244 |
| C | 0.9662011  | 0.1688194  | -1.5485064 |
| C | 1.6636641  | -0.6441816 | -0.7235254 |
| O | 0.9072641  | -2.0623066 | 1.1212866  |
| C | 0.7023251  | -1.2401346 | 0.2437016  |
| N | -0.5388249 | -0.7184316 | -0.0550534 |
| C | -1.7187959 | -1.0252746 | 0.6954576  |
| C | -2.7730679 | -0.6716886 | -1.5895764 |
| C | -2.8332119 | -1.0315616 | -0.2856154 |



|    |            |            |            |
|----|------------|------------|------------|
| C  | -4.7365689 | -0.8081516 | -3.3575064 |
| C  | -4.0982089 | -0.9187016 | -2.1163774 |
| C  | -4.8467409 | -1.4041646 | -1.0330094 |
| C  | -6.1797169 | -1.7657586 | -1.1044834 |
| C  | -6.7894489 | -1.6356546 | -2.3462584 |
| C  | -6.0736759 | -1.1664706 | -3.4552044 |
| Au | 3.6207271  | -1.2711886 | -0.5666874 |
| C  | 7.1753201  | -3.2097856 | 0.7713436  |
| C  | 7.7591391  | -2.2716036 | -0.0114254 |
| H  | 7.6008931  | -3.9869066 | 1.3898156  |
| H  | 8.7993191  | -2.0556756 | -0.2086504 |
| C  | 5.5304261  | -1.9926766 | -0.1743254 |
| N  | 6.7363221  | -1.5402066 | -0.5843524 |
| N  | 5.8107021  | -3.0221096 | 0.6603916  |
| C  | 4.4127631  | 4.0307154  | 0.0460876  |
| F  | 3.5140401  | 4.6017964  | -0.7304014 |
| F  | 5.6176041  | 4.4843744  | -0.2574184 |
| F  | 4.1462551  | 4.2829884  | 1.3107506  |
| S  | 4.4352811  | 2.2149994  | -0.2470374 |
| O  | 2.9362051  | 1.9739434  | 0.1987636  |
| O  | 5.3829051  | 1.6421404  | 0.6864616  |
| O  | 4.6030451  | 2.0108864  | -1.6741934 |
| C  | 6.9394951  | -0.3801496 | -1.4367674 |
| H  | 6.0021501  | -0.1445266 | -1.9456774 |
| H  | 7.2267731  | 0.4863364  | -0.8332764 |
| H  | 7.7152011  | -0.6010116 | -2.1753224 |
| C  | 4.8140751  | -3.8312406 | 1.3438986  |

|   |            |            |            |
|---|------------|------------|------------|
| H | 5.0807001  | -3.9263176 | 2.4002396  |
| H | 3.8393021  | -3.3401526 | 1.2661736  |
| H | 4.7533591  | -4.8262086 | 0.8923036  |
| H | -2.5819799 | 0.7737584  | -3.9241214 |
| H | 2.6110901  | 1.0690774  | -0.0721044 |
| O | -4.0689779 | -1.4773436 | 0.0909656  |

Zero-point correction= 0.596542 (Hartree/Particle)

Thermal correction to Energy= 0.642288

Thermal correction to Enthalpy= 0.643233

Thermal correction to Gibbs Free Energy= 0.511303

Sum of electronic and zero-point Energies= -2739.249085

Sum of electronic and thermal Energies= -2739.203339

Sum of electronic and thermal Enthalpies= -2739.202395

Sum of electronic and thermal Free Energies= -2739.334325

#### **D-ts4**

|   |            |            |            |
|---|------------|------------|------------|
| H | 1.1545229  | 0.3440166  | 3.3726171  |
| H | 0.8646809  | -1.3944724 | 3.3419831  |
| H | 2.3719619  | -0.7328934 | 2.6368861  |
| H | -0.1687291 | -3.4471604 | -3.0314619 |
| H | -0.4008991 | -1.8626674 | -2.3125889 |
| H | -0.2455951 | -3.3038274 | -1.2697889 |
| H | -3.8298381 | -2.6680784 | -3.6101469 |
| H | -2.5964751 | -1.3910954 | -3.5179939 |
| H | -2.2665521 | -2.8593144 | -4.4365549 |
| H | -3.4899751 | -4.8876694 | -2.4733299 |
| H | -2.0030521 | -5.1896764 | -1.5344869 |
| H | -1.9326531 | -5.0634144 | -3.3018749 |

|   |            |            |            |
|---|------------|------------|------------|
| H | -3.4983081 | -3.4666144 | -0.6762609 |
| H | -1.4680881 | 1.4700396  | 1.8139711  |
| H | -2.7986541 | 0.8944716  | 3.8352161  |
| H | -2.0954451 | -3.3356334 | 3.1260301  |
| H | -0.7541991 | -2.7805454 | 1.1017051  |
| H | -2.0619201 | -0.3207874 | -1.8646799 |
| H | -4.9893141 | 0.5983686  | 0.4156871  |
| H | -6.1627831 | 3.4255266  | 0.8889601  |
| H | -1.7737791 | 4.7347506  | -1.1682079 |
| H | -3.4160011 | 6.4725746  | -0.4178839 |
| H | -5.5671221 | 5.8153106  | 0.5916921  |
| C | 1.2986479  | -0.5647444 | 2.7723111  |
| C | -0.6651691 | -2.9183914 | -2.2088859 |
| C | -2.7533721 | -2.4754074 | -3.5318819 |
| C | -2.4171111 | -4.6649554 | -2.4044879 |
| C | -2.1700231 | -3.1616344 | -2.2985939 |
| N | -2.8969631 | -2.7509984 | -1.0712519 |
| O | -4.0194571 | -1.5230844 | 0.4308771  |
| C | -3.1795741 | -1.5670014 | -0.4567899 |
| O | -3.1131451 | -1.5351664 | 4.6991411  |
| C | -1.5961851 | 0.4386586  | 2.1472551  |
| C | -2.3056281 | 0.1319476  | 3.2367601  |
| C | -2.4971911 | -1.2625454 | 3.6817771  |
| C | -1.9016601 | -2.3084144 | 2.8263531  |
| C | -1.1891381 | -2.0104004 | 1.7375841  |
| C | -0.8847791 | -0.5966164 | 1.3223771  |
| C | 0.6317259  | -0.4049354 | 1.4616491  |

|    |            |            |            |
|----|------------|------------|------------|
| C  | 1.1935639  | -0.1075744 | 0.2600511  |
| O  | 0.1946799  | 0.2872446  | -1.9216089 |
| C  | 0.1063589  | -0.0158174 | -0.7470179 |
| N  | -1.0666981 | -0.3899804 | -0.1108899 |
| C  | -2.3480631 | -0.3299034 | -0.8026099 |
| C  | -4.2581961 | 1.2944526  | 0.0323191  |
| C  | -3.0662211 | 0.9501336  | -0.5135459 |
| C  | -5.2106681 | 3.7072166  | 0.4455051  |
| C  | -4.2985991 | 2.7306376  | 0.0306031  |
| C  | -3.0827521 | 3.1394686  | -0.5345919 |
| C  | -2.7242031 | 4.4658896  | -0.7158569 |
| C  | -3.6465061 | 5.4167386  | -0.2969469 |
| C  | -4.8712371 | 5.0413446  | 0.2764131  |
| Au | 2.9156139  | 1.1923106  | 0.1262141  |
| C  | 6.7504149  | 2.9359956  | -0.2114739 |
| C  | 6.0348309  | 4.0853966  | -0.1620789 |
| H  | 7.8128789  | 2.7641346  | -0.3055389 |
| H  | 6.3434009  | 5.1200546  | -0.1990969 |
| C  | 4.5858119  | 2.3718876  | -0.0078939 |
| N  | 4.7080159  | 3.7178926  | -0.0376829 |
| N  | 5.8472479  | 1.8974196  | -0.1128609 |
| C  | 2.8452609  | -3.8859224 | 0.6707361  |
| F  | 3.5091169  | -4.6108554 | 1.5543311  |
| F  | 2.5076589  | -4.6453964 | -0.3587049 |
| F  | 1.7262189  | -3.4298274 | 1.2431701  |
| S  | 3.8612769  | -2.4625614 | 0.1147271  |
| O  | 4.0816389  | -1.6766544 | 1.3335871  |

|   |            |            |            |
|---|------------|------------|------------|
| O | 2.8899539  | -1.7832004 | -0.8300449 |
| O | 5.0180689  | -3.0218144 | -0.5597269 |
| C | 3.6049729  | 4.6571056  | 0.0502521  |
| H | 2.6730699  | 4.0902746  | 0.1116831  |
| H | 3.7086849  | 5.2810956  | 0.9428721  |
| H | 3.5805349  | 5.2931626  | -0.8393089 |
| C | 6.1928829  | 0.4789436  | -0.1670439 |
| H | 7.2678969  | 0.3746196  | -0.0064429 |
| H | 5.6536959  | -0.0713104 | 0.6104181  |
| H | 5.9292339  | 0.0607466  | -1.1432919 |
| H | 2.1492599  | -0.8580184 | -0.2018019 |
| O | -2.3318631 | 2.0571526  | -0.8705049 |

Zero-point correction= 0.591791 (Hartree/Particle)

Thermal correction to Energy= 0.636966

Thermal correction to Enthalpy= 0.637910

Thermal correction to Gibbs Free Energy= 0.507314

Sum of electronic and zero-point Energies= -2739.238823

Sum of electronic and thermal Energies= -2739.193648

Sum of electronic and thermal Enthalpies= -2739.192704

Sum of electronic and thermal Free Energies= -2739.323300

## D-2

|   |            |            |            |
|---|------------|------------|------------|
| H | 2.5461696  | -0.1862972 | 2.9955650  |
| H | 1.1520816  | -0.1553642 | 4.0861900  |
| H | 2.1411786  | -1.6267272 | 3.9553860  |
| H | -7.0909244 | -0.5133952 | -0.0693980 |
| H | -6.0373394 | -1.1241102 | -1.3641410 |
| H | -5.7095484 | -1.5639322 | 0.3291630  |

|   |            |            |            |
|---|------------|------------|------------|
| H | -5.0183344 | 2.4625468  | -1.0500420 |
| H | -5.6190404 | 1.2163078  | -2.1763070 |
| H | -6.6747164 | 1.8493168  | -0.8997070 |
| H | -4.5640524 | 1.8841718  | 1.3489540  |
| H | -4.8382864 | 0.2292848  | 1.9478490  |
| H | -6.2226964 | 1.2686228  | 1.5353080  |
| H | -3.3678964 | 0.7076308  | -1.3084840 |
| H | 1.7310446  | 0.4579878  | 0.6001110  |
| H | 1.5021106  | 1.8524778  | 2.5022920  |
| H | -2.2574684 | 1.7311508  | 3.2892480  |
| H | -1.8438224 | -0.6430742 | 2.7456040  |
| H | -1.5841144 | -1.6530352 | -1.2420130 |
| H | 2.0619416  | 3.3080548  | -0.9095020 |
| H | -1.4514634 | 2.5595718  | -4.4166500 |
| H | 0.2151646  | 4.4181208  | -4.6336710 |
| H | 1.9364026  | 4.7650328  | -2.9015480 |
| C | 1.7160676  | -0.7906412 | 3.3911060  |
| C | -6.0544724 | -0.7618642 | -0.3290830 |
| C | -5.6435684 | 1.5643868  | -1.1355450 |
| C | -5.1987314 | 0.9943608  | 1.2532920  |
| C | -5.1737454 | 0.4744128  | -0.1815680 |
| N | -3.7833044 | 0.1560248  | -0.5672460 |
| O | -3.3571674 | -1.4703752 | 0.9806800  |
| C | -3.0015524 | -0.7452742 | 0.0660260  |
| O | -0.7857074 | 3.6813798  | 2.3936480  |
| C | 0.7045316  | 0.8024438  | 0.7894560  |
| C | 0.8171136  | 2.0545848  | 1.6667450  |

|    |            |            |            |
|----|------------|------------|------------|
| C  | -0.4993444 | 2.5088938  | 2.2437590  |
| C  | -1.3982794 | 1.4279988  | 2.6932100  |
| C  | -1.1733104 | 0.1432628  | 2.3983680  |
| C  | -0.0594454 | -0.3496342 | 1.5033590  |
| C  | 0.8512286  | -1.2813792 | 2.2908970  |
| C  | 0.7234866  | -2.5350252 | 1.8309760  |
| O  | -0.5526044 | -3.5169762 | -0.0077710 |
| C  | -0.2186374 | -2.5746772 | 0.6957470  |
| N  | -0.6376924 | -1.2773682 | 0.5324560  |
| C  | -1.5555184 | -0.8510472 | -0.4857320 |
| C  | 0.0559756  | 1.1049718  | -0.5295680 |
| C  | -0.9662604 | 0.3881168  | -1.0502330 |
| C  | 1.2759456  | 3.1631338  | -1.6457810 |
| C  | 0.3330076  | 2.1386308  | -1.5037160 |
| C  | -0.6115914 | 1.9536498  | -2.5236400 |
| C  | -0.6981494 | 2.7435048  | -3.6560750 |
| C  | 0.2353156  | 3.7672318  | -3.7631300 |
| C  | 1.2101186  | 3.9660378  | -2.7757910 |
| Au | 3.2528776  | -0.8468982 | -0.9540420 |
| C  | 1.9184296  | -4.8326282 | -1.2616510 |
| C  | 2.8881966  | -4.9547322 | -0.3249260 |
| H  | 1.2155716  | -5.5495722 | -1.6588010 |
| H  | 3.2246746  | -5.8086502 | 0.2445730  |
| C  | 2.8419496  | -2.8104352 | -0.9848320 |
| N  | 3.4500696  | -3.7012642 | -0.1696100 |
| N  | 1.9120716  | -3.5122552 | -1.6616930 |
| C  | 5.0866856  | 3.1141308  | 0.4435690  |

|   |            |            |            |
|---|------------|------------|------------|
| F | 3.9837146  | 3.8532988  | 0.5228450  |
| F | 5.6894216  | 3.3566508  | -0.7069850 |
| F | 5.8935406  | 3.4390308  | 1.4395780  |
| S | 4.6556746  | 1.3364628  | 0.5782710  |
| O | 3.9027306  | 1.2183118  | 1.8269050  |
| O | 5.9033366  | 0.5957688  | 0.4605470  |
| O | 3.7636696  | 1.2112258  | -0.6535550 |
| C | 4.4652816  | -3.3509012 | 0.8129580  |
| H | 4.9626276  | -4.2632342 | 1.1496280  |
| H | 5.2037356  | -2.6788202 | 0.3674810  |
| H | 4.0033466  | -2.8452992 | 1.6685730  |
| C | 0.9633506  | -2.9645972 | -2.6159380 |
| H | 1.0735436  | -1.8765752 | -2.6334880 |
| H | 1.1559826  | -3.3641892 | -3.6158340 |
| H | -0.0449444 | -3.2257512 | -2.2798860 |
| H | 1.2627946  | 2.8864848  | 1.1117240  |
| O | -1.4130404 | 0.8743178  | -2.2488690 |
| H | 1.2246106  | -3.4229882 | 2.2044020  |

Zero-point correction= 0.599758 (Hartree/Particle)

Thermal correction to Energy= 0.644275

Thermal correction to Enthalpy= 0.645219

Thermal correction to Gibbs Free Energy= 0.520140

Sum of electronic and zero-point Energies= -2739.287897

Sum of electronic and thermal Energies= -2739.243380

Sum of electronic and thermal Enthalpies= -2739.242436

Sum of electronic and thermal Free Energies= -2739.367514

**D-int5**



|   |            |            |            |
|---|------------|------------|------------|
| H | 0.7264751  | 3.6952161  | -1.5279812 |
| H | 1.0389501  | 3.7489631  | 0.2039868  |
| H | 2.3123111  | 3.1784141  | -0.9065802 |
| H | -1.7321889 | -5.1348859 | -0.4563842 |
| H | -0.9652609 | -3.5258589 | -0.4870082 |
| H | -0.6155229 | -4.6328339 | 0.8337408  |
| H | -4.5841049 | -2.9529419 | 0.6717398  |
| H | -3.5329819 | -2.7436489 | -0.7414272 |
| H | -4.1735019 | -4.3395739 | -0.3634122 |
| H | -3.8899189 | -4.4837049 | 2.5620688  |
| H | -2.2178919 | -5.0976249 | 2.6498148  |
| H | -3.3336299 | -5.7369789 | 1.4323768  |
| H | -2.0082189 | -2.8222599 | 2.7890788  |
| H | -1.5718789 | 1.6623861  | -2.2298292 |
| H | -3.0316429 | 3.6283851  | -1.7639272 |
| H | -1.8206739 | 3.5475311  | 2.4096758  |
| H | -0.4000709 | 1.5434191  | 1.9636238  |
| H | -1.8210769 | -1.6566429 | -0.6182342 |
| H | -3.7670629 | 0.5717631  | 1.9311348  |
| H | -6.4345929 | 2.0610841  | 1.4433978  |
| H | -5.4984649 | 0.5805321  | -3.2627862 |
| H | -7.5394429 | 1.9227171  | -2.7147822 |
| H | -7.9853199 | 2.6466531  | -0.4008802 |
| C | 1.2344711  | 3.1699211  | -0.7087852 |
| C | -1.4105959 | -4.2873079 | 0.1621998  |
| C | -3.7834399 | -3.4171839 | 0.0837468  |
| C | -3.0350669 | -4.8291369 | 1.9676958  |

|    |            |            |            |
|----|------------|------------|------------|
| C  | -2.5900149 | -3.7570609 | 0.9754738  |
| N  | -2.1796989 | -2.6080979 | 1.8127278  |
| O  | -1.2045369 | -0.6687579 | 2.3986008  |
| C  | -1.6945499 | -1.3692699 | 1.5256478  |
| O  | -3.1845139 | 4.7712571  | 0.5635438  |
| C  | -1.6235859 | 2.1228841  | -1.2426312 |
| C  | -2.4035329 | 3.1803421  | -0.9965052 |
| C  | -2.4904659 | 3.7887151  | 0.3473078  |
| C  | -1.7103849 | 3.1305881  | 1.4109528  |
| C  | -0.9433189 | 2.0600921  | 1.1739778  |
| C  | -0.7294769 | 1.5092591  | -0.2070312 |
| C  | 0.7427391  | 1.7736241  | -0.5791992 |
| C  | 1.4339921  | 0.6224611  | -0.7107602 |
| O  | 0.7032981  | -1.6986729 | -0.4678162 |
| C  | 0.4867661  | -0.4945689 | -0.4739282 |
| N  | -0.7614559 | 0.0522211  | -0.2539212 |
| C  | -1.8586799 | -0.8263399 | 0.0979748  |
| C  | -3.9789529 | 0.4636561  | 0.8749308  |
| C  | -3.1807249 | -0.1570079 | -0.0254322 |
| C  | -6.2350799 | 1.7308321  | 0.4271178  |
| C  | -5.0945709 | 0.9770261  | 0.1307188  |
| C  | -4.8665259 | 0.5887571  | -1.1977982 |
| C  | -5.7148579 | 0.9017591  | -2.2480272 |
| C  | -6.8423429 | 1.6466851  | -1.9273212 |
| C  | -7.0963359 | 2.0564141  | -0.6092752 |
| Au | 3.3966411  | 0.2151351  | -1.1697042 |
| C  | 7.3204931  | -1.4375989 | -1.5884752 |

|   |            |            |            |
|---|------------|------------|------------|
| C | 7.6230071  | -0.1373139 | -1.8138912 |
| H | 7.9467981  | -2.3169969 | -1.5432632 |
| H | 8.5674901  | 0.3508981  | -2.0068252 |
| C | 5.3935601  | -0.2680749 | -1.5074522 |
| N | 6.4314221  | 0.5617241  | -1.7603412 |
| N | 5.9515061  | -1.4976289 | -1.4044192 |
| C | 4.9089531  | 0.4952471  | 2.6765948  |
| F | 6.2022841  | 0.7019241  | 2.8619338  |
| F | 4.7436441  | -0.4379879 | 1.7502558  |
| F | 4.3523761  | 0.1023201  | 3.8026388  |
| S | 4.1538501  | 2.0818191  | 2.1252448  |
| O | 4.1997061  | 2.9682821  | 3.2583408  |
| O | 2.6547211  | 1.6182471  | 1.9277978  |
| O | 4.7731871  | 2.4091321  | 0.8558508  |
| C | 6.3208551  | 2.0012611  | -1.9254152 |
| H | 5.2710841  | 2.2815091  | -1.8133432 |
| H | 6.8985601  | 2.5135871  | -1.1511032 |
| H | 6.6802081  | 2.2949131  | -2.9161692 |
| C | 5.2196341  | -2.7115989 | -1.0851992 |
| H | 5.5198281  | -3.0860519 | -0.1015922 |
| H | 4.1502341  | -2.4825109 | -1.0668872 |
| H | 5.4128851  | -3.4774009 | -1.8420552 |
| O | -3.7040869 | -0.1133739 | -1.2941402 |
| H | 2.4683131  | 1.2773391  | 1.0100238  |

Zero-point correction= 0.595291 (Hartree/Particle)

Thermal correction to Energy= 0.641368

Thermal correction to Enthalpy= 0.642312

Thermal correction to Gibbs Free Energy= 0.511243

Sum of electronic and zero-point Energies= -2739.217755

Sum of electronic and thermal Energies= -2739.171678

Sum of electronic and thermal Enthalpies= -2739.170734

Sum of electronic and thermal Free Energies= -2739.301803

### **D-ts5**

|   |            |            |            |
|---|------------|------------|------------|
| H | 1.1545229  | 0.3440166  | 3.3726171  |
| H | 0.8646809  | -1.3944724 | 3.3419831  |
| H | 2.3719619  | -0.7328934 | 2.6368861  |
| H | -0.1687291 | -3.4471604 | -3.0314619 |
| H | -0.4008991 | -1.8626674 | -2.3125889 |
| H | -0.2455951 | -3.3038274 | -1.2697889 |
| H | -3.8298381 | -2.6680784 | -3.6101469 |
| H | -2.5964751 | -1.3910954 | -3.5179939 |
| H | -2.2665521 | -2.8593144 | -4.4365549 |
| H | -3.4899751 | -4.8876694 | -2.4733299 |
| H | -2.0030521 | -5.1896764 | -1.5344869 |
| H | -1.9326531 | -5.0634144 | -3.3018749 |
| H | -3.4983081 | -3.4666144 | -0.6762609 |
| H | -1.4680881 | 1.4700396  | 1.8139711  |
| H | -2.7986541 | 0.8944716  | 3.8352161  |
| H | -2.0954451 | -3.3356334 | 3.1260301  |
| H | -0.7541991 | -2.7805454 | 1.1017051  |
| H | -2.0619201 | -0.3207874 | -1.8646799 |
| H | -4.9893141 | 0.5983686  | 0.4156871  |
| H | -6.1627831 | 3.4255266  | 0.8889601  |
| H | -1.7737791 | 4.7347506  | -1.1682079 |

|   |            |            |            |
|---|------------|------------|------------|
| H | -3.4160011 | 6.4725746  | -0.4178839 |
| H | -5.5671221 | 5.8153106  | 0.5916921  |
| C | 1.2986479  | -0.5647444 | 2.7723111  |
| C | -0.6651691 | -2.9183914 | -2.2088859 |
| C | -2.7533721 | -2.4754074 | -3.5318819 |
| C | -2.4171111 | -4.6649554 | -2.4044879 |
| C | -2.1700231 | -3.1616344 | -2.2985939 |
| N | -2.8969631 | -2.7509984 | -1.0712519 |
| O | -4.0194571 | -1.5230844 | 0.4308771  |
| C | -3.1795741 | -1.5670014 | -0.4567899 |
| O | -3.1131451 | -1.5351664 | 4.6991411  |
| C | -1.5961851 | 0.4386586  | 2.1472551  |
| C | -2.3056281 | 0.1319476  | 3.2367601  |
| C | -2.4971911 | -1.2625454 | 3.6817771  |
| C | -1.9016601 | -2.3084144 | 2.8263531  |
| C | -1.1891381 | -2.0104004 | 1.7375841  |
| C | -0.8847791 | -0.5966164 | 1.3223771  |
| C | 0.6317259  | -0.4049354 | 1.4616491  |
| C | 1.1935639  | -0.1075744 | 0.2600511  |
| O | 0.1946799  | 0.2872446  | -1.9216089 |
| C | 0.1063589  | -0.0158174 | -0.7470179 |
| N | -1.0666981 | -0.3899804 | -0.1108899 |
| C | -2.3480631 | -0.3299034 | -0.8026099 |
| C | -4.2581961 | 1.2944526  | 0.0323191  |
| C | -3.0662211 | 0.9501336  | -0.5135459 |
| C | -5.2106681 | 3.7072166  | 0.4455051  |
| C | -4.2985991 | 2.7306376  | 0.0306031  |

|    |            |            |            |
|----|------------|------------|------------|
| C  | -3.0827521 | 3.1394686  | -0.5345919 |
| C  | -2.7242031 | 4.4658896  | -0.7158569 |
| C  | -3.6465061 | 5.4167386  | -0.2969469 |
| C  | -4.8712371 | 5.0413446  | 0.2764131  |
| Au | 2.9156139  | 1.1923106  | 0.1262141  |
| C  | 6.7504149  | 2.9359956  | -0.2114739 |
| C  | 6.0348309  | 4.0853966  | -0.1620789 |
| H  | 7.8128789  | 2.7641346  | -0.3055389 |
| H  | 6.3434009  | 5.1200546  | -0.1990969 |
| C  | 4.5858119  | 2.3718876  | -0.0078939 |
| N  | 4.7080159  | 3.7178926  | -0.0376829 |
| N  | 5.8472479  | 1.8974196  | -0.1128609 |
| C  | 2.8452609  | -3.8859224 | 0.6707361  |
| F  | 3.5091169  | -4.6108554 | 1.5543311  |
| F  | 2.5076589  | -4.6453964 | -0.3587049 |
| F  | 1.7262189  | -3.4298274 | 1.2431701  |
| S  | 3.8612769  | -2.4625614 | 0.1147271  |
| O  | 4.0816389  | -1.6766544 | 1.3335871  |
| O  | 2.8899539  | -1.7832004 | -0.8300449 |
| O  | 5.0180689  | -3.0218144 | -0.5597269 |
| C  | 3.6049729  | 4.6571056  | 0.0502521  |
| H  | 2.6730699  | 4.0902746  | 0.1116831  |
| H  | 3.7086849  | 5.2810956  | 0.9428721  |
| H  | 3.5805349  | 5.2931626  | -0.8393089 |
| C  | 6.1928829  | 0.4789436  | -0.1670439 |
| H  | 7.2678969  | 0.3746196  | -0.0064429 |
| H  | 5.6536959  | -0.0713104 | 0.6104181  |

|   |            |            |            |
|---|------------|------------|------------|
| H | 5.9292339  | 0.0607466  | -1.1432919 |
| H | 2.1492599  | -0.8580184 | -0.2018019 |
| O | -2.3318631 | 2.0571526  | -0.8705049 |

Zero-point correction= 0.590977 (Hartree/Particle)

Thermal correction to Energy= 0.636293

Thermal correction to Enthalpy= 0.637238

Thermal correction to Gibbs Free Energy= 0.507275

Sum of electronic and zero-point Energies= -2739.201302

Sum of electronic and thermal Energies= -2739.155985

Sum of electronic and thermal Enthalpies= -2739.155041

Sum of electronic and thermal Free Energies= -2739.285004

### **D-int6**

|   |            |            |            |
|---|------------|------------|------------|
| H | 1.9974171  | -2.8499233 | 0.8584172  |
| H | 0.9963931  | -4.1215303 | 0.1204972  |
| H | 2.3292111  | -3.3358013 | -0.8004978 |
| H | -4.8349429 | -1.6753263 | -3.4070418 |
| H | -3.3765549 | -1.0228493 | -2.6659468 |
| H | -3.9838049 | -2.6239923 | -2.1721048 |
| H | -6.1793999 | 0.8818757  | -0.9569288 |
| H | -4.6290049 | 1.0973077  | -1.7937788 |
| H | -6.0308039 | 0.5110977  | -2.6888998 |
| H | -7.1456779 | -1.3901163 | -0.5538268 |
| H | -6.2648249 | -2.8481353 | -1.0818428 |
| H | -6.9922189 | -1.7610213 | -2.2799118 |
| H | -5.1756779 | -1.5340713 | 0.6605022  |
| H | 0.3582181  | -0.1032103 | 1.3826252  |
| H | 0.1186561  | -1.1007613 | 3.6341142  |

|   |            |            |            |
|---|------------|------------|------------|
| H | -2.1583919 | -4.4081853 | 1.9638672  |
| H | -1.8878619 | -3.4459793 | -0.3195048 |
| H | -2.8057479 | 0.4222767  | -1.2588778 |
| H | -2.5291379 | 1.5305037  | 2.4098312  |
| H | -0.9986139 | 4.0009127  | 3.5006162  |
| H | 1.0341411  | 3.7790847  | -1.0894998 |
| H | 1.7720271  | 5.5088917  | 0.5664592  |
| H | 0.7604991  | 5.6092277  | 2.8160612  |
| C | 1.5256471  | -3.1806043 | -0.0759748 |
| C | -4.2792329 | -1.6085533 | -2.4637948 |
| C | -5.5168869 | 0.4597157  | -1.7215108 |
| C | -6.4705959 | -1.7967293 | -1.3178438 |
| C | -5.1750679 | -0.9922763 | -1.3932618 |
| N | -4.5787659 | -1.1081813 | -0.0410568 |
| O | -3.3515169 | -0.6477193 | 1.7813822  |
| C | -3.4963569 | -0.5567863 | 0.5706222  |
| O | -1.0944919 | -3.3584873 | 4.0861992  |
| C | -0.1616339 | -1.0489523 | 1.5347392  |
| C | -0.2815919 | -1.5892013 | 2.7490842  |
| C | -0.9926589 | -2.8615333 | 2.9780012  |
| C | -1.5857239 | -3.5014323 | 1.7837732  |
| C | -1.4432209 | -2.9832173 | 0.5633112  |
| C | -0.6432269 | -1.7337313 | 0.2872422  |
| C | 0.5642561  | -2.1659303 | -0.5622768 |
| C | 0.4562761  | -1.6123483 | -1.8121638 |
| O | -1.2392059 | -0.2140713 | -2.8614808 |
| C | -0.7953499 | -0.8113593 | -1.9021318 |



|    |            |            |            |
|----|------------|------------|------------|
| N  | -1.3782649 | -0.8674683 | -0.6441538 |
| C  | -2.4138559 | 0.1018227  | -0.2852978 |
| C  | -1.9073549 | 1.8822967  | 1.5989472  |
| C  | -1.8129589 | 1.2990487  | 0.3789212  |
| C  | -0.5623439 | 3.9524017  | 2.5058452  |
| C  | -0.9793799 | 2.9812737  | 1.5873762  |
| C  | -0.3875219 | 2.9594327  | 0.3151982  |
| C  | 0.5990701  | 3.8429507  | -0.0951788 |
| C  | 0.9975131  | 4.7944077  | 0.8360642  |
| C  | 0.4238841  | 4.8475117  | 2.1166842  |
| Au | 1.8810691  | -0.0310163 | -0.9665938 |
| C  | 4.3718391  | 3.0272447  | 0.5844082  |
| C  | 4.8074571  | 3.0189417  | -0.6986938 |
| H  | 4.6958501  | 3.5952837  | 1.4439812  |
| H  | 5.6010251  | 3.5662367  | -1.1853908 |
| C  | 3.1409281  | 1.5340667  | -0.5375978 |
| N  | 4.0298331  | 2.1028807  | -1.3754038 |
| N  | 3.3464321  | 2.1088787  | 0.6622762  |
| C  | 5.7415611  | -2.8225103 | 0.3694162  |
| F  | 6.3753321  | -2.6013853 | 1.5136062  |
| F  | 6.6380641  | -3.0731153 | -0.5760478 |
| F  | 4.9653711  | -3.8958523 | 0.5135792  |
| S  | 4.7093151  | -1.3791743 | -0.0876318 |
| O  | 3.7749131  | -1.2723423 | 1.0562302  |
| O  | 4.0712641  | -1.8277733 | -1.3472558 |
| O  | 5.6449011  | -0.2594163 | -0.2374798 |
| C  | 4.3199531  | 1.5982487  | -2.7075718 |

|   |            |            |            |
|---|------------|------------|------------|
| H | 4.8688261  | 2.3593337  | -3.2672328 |
| H | 4.9183481  | 0.6853157  | -2.6150258 |
| H | 3.3831281  | 1.3745487  | -3.2247088 |
| C | 2.6721211  | 1.7086827  | 1.8862702  |
| H | 1.5914431  | 1.8545877  | 1.7778212  |
| H | 2.9095341  | 0.6578637  | 2.0878992  |
| H | 3.0269411  | 2.3399667  | 2.7039732  |
| H | 1.0251411  | -1.9150563 | -2.6891648 |
| O | -0.9039299 | 1.9430087  | -0.4252558 |

Zero-point correction= 0.595574 (Hartree/Particle)

Thermal correction to Energy= 0.641359

Thermal correction to Enthalpy= 0.642303

Thermal correction to Gibbs Free Energy= 0.513114

Sum of electronic and zero-point Energies= -2739.238861

Sum of electronic and thermal Energies= -2739.193076

Sum of electronic and thermal Enthalpies= -2739.192131

Sum of electronic and thermal Free Energies= -2739.321320

### E-1

|    |            |            |            |
|----|------------|------------|------------|
| Au | -3.9640578 | -1.1908283 | 0.7136303  |
| C  | -6.6707888 | -3.0408153 | -1.9383147 |
| C  | -7.5451008 | -2.8075863 | -0.9308977 |
| H  | -6.8058738 | -3.5046073 | -2.9048837 |
| H  | -8.5989888 | -3.0261113 | -0.8361667 |
| C  | -5.5400458 | -2.0311703 | -0.2865037 |
| N  | -6.8317588 | -2.1846133 | 0.0763063  |
| N  | -5.4442338 | -2.5577293 | -1.5262797 |
| C  | 7.9899562  | -2.2460273 | -0.0845437 |

|   |            |            |            |
|---|------------|------------|------------|
| F | 8.4464882  | -1.6298663 | 1.0035043  |
| F | 8.8030912  | -1.9664583 | -1.0975787 |
| F | 8.0207622  | -3.5570793 | 0.1326193  |
| S | 6.2835592  | -1.6889383 | -0.4532227 |
| O | 5.5225312  | -2.0782863 | 0.7405063  |
| O | 5.9501772  | -2.4775893 | -1.6706907 |
| O | 6.4154352  | -0.2488003 | -0.6940447 |
| C | -7.4054728 | -1.7732333 | 1.3457653  |
| H | -6.6316418 | -1.2727133 | 1.9320863  |
| H | -8.2336568 | -1.0794663 | 1.1763023  |
| H | -7.7666108 | -2.6455323 | 1.8977723  |
| C | -4.2323678 | -2.6242613 | -2.3395147 |
| H | -4.3815118 | -2.0600083 | -3.2643067 |
| H | -3.3839348 | -2.2001083 | -1.7918197 |
| H | -4.0122488 | -3.6675183 | -2.5804877 |
| C | 1.0634772  | 4.4118757  | -1.3455147 |
| N | -0.5841908 | 3.1084557  | -1.0997177 |
| C | 0.3324562  | 2.7004337  | -0.1604067 |
| C | 1.4102502  | 3.5474827  | -0.2882297 |
| C | 0.0670802  | 1.4764697  | 0.6545063  |
| N | -0.0456548 | 0.2913107  | -0.2309887 |
| C | -1.1000138 | -0.5590293 | -0.1480407 |
| C | 1.0596772  | -0.0670633 | -1.0828517 |
| O | -1.3672278 | -1.4561553 | -0.9350807 |
| C | -1.9353718 | -0.3911933 | 1.0654333  |
| C | -2.2766628 | -0.3237763 | 2.2491603  |
| C | 1.3784872  | 0.6569777  | -2.2321507 |

|   |            |            |            |
|---|------------|------------|------------|
| C | 2.5080962  | 0.3263797  | -2.9622157 |
| C | 3.3399192  | -0.7309773 | -2.5618437 |
| C | 2.9925232  | -1.4772663 | -1.4206027 |
| C | 1.8677862  | -1.1373173 | -0.6933537 |
| O | 4.4173292  | -0.9866203 | -3.2921657 |
| H | -0.9046528 | 1.5949967  | 1.1395173  |
| C | 1.0064852  | 1.1778797  | 1.8340603  |
| O | 0.4948492  | 0.9213387  | 2.9234433  |
| N | 2.3196932  | 1.1821117  | 1.5595383  |
| C | 3.4129502  | 0.7643387  | 2.4794603  |
| C | 3.3056982  | -0.7310533 | 2.7555783  |
| C | 4.7060422  | 1.0760617  | 1.7421413  |
| C | 3.3319942  | 1.5748747  | 3.7673263  |
| C | -2.4795468 | -0.1172713 | 3.6680083  |
| H | 2.3252032  | 3.5285507  | 0.2881023  |
| H | 0.7611592  | 1.4961117  | -2.5448807 |
| H | 2.7892882  | 0.8903557  | -3.8475437 |
| H | 3.6324562  | -2.2946873 | -1.0983777 |
| H | 1.6152872  | -1.6932763 | 0.2096363  |
| H | 5.0389392  | -1.5771013 | -2.7909287 |
| H | 2.5815112  | 1.2331377  | 0.5795963  |
| H | 3.4682302  | -1.3069363 | 1.8372073  |
| H | 4.0935702  | -1.0330083 | 3.4559793  |
| H | 2.3323062  | -0.9763593 | 3.1966703  |
| H | 5.5658132  | 0.7331517  | 2.3277713  |
| H | 4.8090942  | 2.1571847  | 1.5750163  |
| H | 4.7717012  | 0.5536927  | 0.7792943  |

|   |            |            |            |
|---|------------|------------|------------|
| H | 4.1961022  | 1.3304247  | 4.3964173  |
| H | 2.4161652  | 1.3573817  | 4.3236233  |
| H | 3.3643462  | 2.6496807  | 3.5480663  |
| H | -1.5431148 | 0.3316497  | 4.0300473  |
| H | -2.6622288 | -1.0575933 | 4.1963863  |
| H | -3.3069258 | 0.5718637  | 3.8650083  |
| H | 1.6466562  | 5.2227537  | -1.7644987 |
| N | -0.1332758 | 4.1409137  | -1.8455997 |
| C | -1.8544958 | 2.5384497  | -1.3841187 |
| C | -2.8378558 | 2.5021667  | -0.3988077 |
| C | -2.1014858 | 2.0100767  | -2.6496037 |
| C | -4.0600048 | 1.8935477  | -0.6695907 |
| H | -2.6471508 | 2.9678137  | 0.5661183  |
| C | -3.3262168 | 1.4104257  | -2.9148227 |
| H | -1.3280818 | 2.0749577  | -3.4103857 |
| C | -4.3021238 | 1.3369147  | -1.9231877 |
| H | -4.8331488 | 1.8722387  | 0.0968363  |
| H | -3.5158998 | 0.9968027  | -3.9022577 |
| H | -5.2609988 | 0.8647977  | -2.1314177 |

Zero-point correction= 0.628804 (Hartree/Particle)

Thermal correction to Energy= 0.677840

Thermal correction to Enthalpy= 0.678784

Thermal correction to Gibbs Free Energy= 0.540348

Sum of electronic and zero-point Energies= -2812.663097

Sum of electronic and thermal Energies= -2812.614061

Sum of electronic and thermal Enthalpies= -2812.613117

Sum of electronic and thermal Free Energies= -2812.751554

**E-tsl**

|   |            |            |            |
|---|------------|------------|------------|
| H | 0.5434306  | -4.1992783 | -1.6760583 |
| H | 2.1681366  | -4.3498753 | -2.3948413 |
| H | 1.9047656  | -4.7864713 | -0.6881693 |
| H | -1.1532964 | 5.2446777  | 1.1071347  |
| H | -1.3962164 | 3.5074347  | 0.9595417  |
| H | 0.2077186  | 4.2287777  | 0.5972467  |
| H | -3.1205384 | 4.8505037  | -2.0768923 |
| H | -3.2907734 | 3.7561277  | -0.6873263 |
| H | -3.1942674 | 5.5126767  | -0.4307953 |
| H | -0.9581374 | 6.1195797  | -2.4491733 |
| H | 0.4113486  | 5.8811267  | -1.3364893 |
| H | -1.0491084 | 6.7439027  | -0.7967553 |
| H | -0.6064464 | 3.9160267  | -2.7927603 |
| H | -4.1120374 | -3.9593903 | -2.1131483 |
| H | -1.3021754 | -1.7260253 | 0.6310877  |
| H | -2.8851024 | -3.4238093 | -0.2672463 |
| H | -2.0514424 | -2.1188283 | -4.2575753 |
| H | -0.4582164 | -0.3907273 | -3.3567823 |
| H | 0.1539866  | 1.8823157  | 0.2097787  |
| H | -3.2057384 | 1.3919317  | -1.7924363 |
| C | 1.6195566  | -4.0920723 | -1.4839613 |
| C | -0.8790614 | 4.3638087  | 0.5153687  |
| C | -2.8175394 | 4.6792937  | -1.0368183 |
| C | -0.6825384 | 5.9108367  | -1.4069453 |
| C | -1.2974204 | 4.5952857  | -0.9292623 |
| N | -0.7700304 | 3.5651987  | -1.8543913 |

|    |            |            |            |
|----|------------|------------|------------|
| O  | 0.1627376  | 1.7734397  | -2.8087403 |
| C  | -0.3619254 | 2.2641407  | -1.8201603 |
| O  | -3.4636724 | -3.7098963 | -2.8233533 |
| C  | -1.4579714 | -1.8229353 | -0.4441033 |
| C  | -2.3274104 | -2.7770533 | -0.9367023 |
| C  | -2.5778304 | -2.8580033 | -2.3168043 |
| C  | -1.8586864 | -2.0307653 | -3.1913013 |
| C  | -0.9799724 | -1.0788713 | -2.6964673 |
| C  | -0.7951724 | -0.9614663 | -1.3189813 |
| C  | 1.8442266  | -2.7089163 | -1.0992993 |
| C  | 1.7556906  | -1.5086753 | -0.8329393 |
| O  | 2.1697756  | 0.7180757  | -0.1660263 |
| C  | 1.3569196  | -0.1121073 | -0.5657343 |
| N  | 0.0443926  | 0.0809307  | -0.7805093 |
| C  | -0.5060564 | 1.4260727  | -0.5358253 |
| C  | -3.0777244 | 1.2070877  | -0.7328483 |
| C  | -1.9000044 | 1.2811507  | -0.0266843 |
| N  | -2.1986404 | 0.8981667  | 1.2649857  |
| C  | -4.0405454 | 0.7719957  | 0.2003617  |
| Au | 3.9151266  | -1.8408263 | -0.3811983 |
| C  | 7.5961646  | -0.1450713 | 0.7943937  |
| C  | 7.9804806  | -1.4434713 | 0.8131727  |
| H  | 8.1403726  | 0.7613417  | 1.0172527  |
| H  | 8.9265766  | -1.9039553 | 1.0585557  |
| C  | 5.8245216  | -1.3799593 | 0.1938077  |
| N  | 6.8772586  | -2.1884233 | 0.4410627  |
| N  | 6.2690136  | -0.1244733 | 0.4134687  |

|   |            |            |            |
|---|------------|------------|------------|
| C | -5.4355084 | -2.5893043 | 1.3569547  |
| F | -5.9271444 | -1.4346073 | 1.7966287  |
| F | -4.1014744 | -2.5524773 | 1.5190207  |
| F | -5.9030054 | -3.5666763 | 2.1253697  |
| S | -5.8909594 | -2.8485743 | -0.4073783 |
| O | -7.3392874 | -3.0083933 | -0.3566433 |
| O | -5.1285334 | -4.0857213 | -0.7394973 |
| O | -5.3687534 | -1.6440403 | -1.0642273 |
| C | 6.8688986  | -3.6382553 | 0.3469287  |
| H | 7.6065456  | -3.9716393 | -0.3882653 |
| H | 7.0966806  | -4.0801253 | 1.3209507  |
| H | 5.8751806  | -3.9626613 | 0.0302977  |
| C | 5.4881046  | 1.0983447  | 0.2466827  |
| H | 5.8198886  | 1.6301807  | -0.6493733 |
| H | 4.4236766  | 0.8576037  | 0.1495827  |
| H | 5.6305526  | 1.7352877  | 1.1233427  |
| C | -1.3338784 | 0.5540217  | 2.3374587  |
| C | -1.6253184 | -0.6037253 | 3.0642587  |
| C | -0.2310754 | 1.3347887  | 2.6817957  |
| C | -0.7984664 | -0.9820533 | 4.1131977  |
| H | -2.5060994 | -1.1803903 | 2.7933947  |
| C | 0.5991806  | 0.9346457  | 3.7241687  |
| H | -0.0345584 | 2.2723617  | 2.1700237  |
| C | 0.3224736  | -0.2233703 | 4.4417047  |
| H | -1.0333484 | -1.8821473 | 4.6763017  |
| H | 1.4553036  | 1.5514087  | 3.9879267  |
| H | 0.9679796  | -0.5260953 | 5.2627827  |



|   |            |           |           |
|---|------------|-----------|-----------|
| H | -5.0838864 | 0.5373557 | 0.0294367 |
| N | -3.5096734 | 0.5837027 | 1.3954627 |

Zero-point correction= 0.628380 (Hartree/Particle)

Thermal correction to Energy= 0.676821

Thermal correction to Enthalpy= 0.677765

Thermal correction to Gibbs Free Energy= 0.540064

Sum of electronic and zero-point Energies= -2812.652172

Sum of electronic and thermal Energies= -2812.603730

Sum of electronic and thermal Enthalpies= -2812.602786

Sum of electronic and thermal Free Energies= -2812.740487

### **E-int1**

|   |            |            |            |
|---|------------|------------|------------|
| H | 0.3614188  | -3.8491507 | -1.2255360 |
| H | 0.7818838  | -3.3020007 | -2.8460540 |
| H | 2.0705388  | -3.6235507 | -1.6638280 |
| H | -0.3456012 | 5.1766443  | 1.3094180  |
| H | -0.8488452 | 3.4954953  | 1.2632790  |
| H | 0.6456958  | 4.0054663  | 0.4154850  |
| H | -3.2668952 | 5.0528673  | -1.0929310 |
| H | -3.0776022 | 3.8153763  | 0.1669690  |
| H | -2.8131292 | 5.5305963  | 0.5565610  |
| H | -1.2374062 | 6.2334953  | -2.0501170 |
| H | 0.3781588  | 5.8838243  | -1.3893860 |
| H | -0.8264542 | 6.7560503  | -0.4106740 |
| H | -1.2275522 | 4.0491673  | -2.5943720 |
| H | -4.5260582 | -3.3754497 | -1.8228090 |
| H | -0.9478962 | -1.7084027 | 0.6259040  |
| H | -2.9995702 | -2.8724167 | -0.1424110 |

|   |            |            |            |
|---|------------|------------|------------|
| H | -2.1888192 | -1.6314437 | -4.2190950 |
| H | -0.1670252 | -0.3832087 | -3.4475450 |
| H | -0.0550242 | 2.0260253  | 0.1127460  |
| H | -3.4750762 | 1.4794193  | -1.5256510 |
| C | 1.0619778  | -3.2169937 | -1.7875450 |
| C | -0.3845332 | 4.2893223  | 0.6670340  |
| C | -2.6775102 | 4.7618773  | -0.2146120 |
| C | -0.6875832 | 5.9521533  | -1.1421890 |
| C | -1.1997142 | 4.6283853  | -0.5764650 |
| N | -1.0370012 | 3.6529643  | -1.6790240 |
| O | -0.9537642 | 1.7927743  | -2.9228090 |
| C | -0.9059192 | 2.3025803  | -1.8119320 |
| O | -3.7066292 | -2.9732957 | -2.6770620 |
| C | -1.2468262 | -1.7028067 | -0.4230910 |
| C | -2.3473882 | -2.3496097 | -0.8362000 |
| C | -2.7041382 | -2.3532307 | -2.2457770 |
| C | -1.8668422 | -1.6333357 | -3.1814640 |
| C | -0.7817962 | -0.9595507 | -2.7631380 |
| C | -0.3031552 | -1.0098077 | -1.3515210 |
| C | 1.0310358  | -1.8066247 | -1.3214040 |
| C | 2.0311178  | -1.0542687 | -0.8330200 |
| O | 2.0553458  | 1.2573283  | -0.0457770 |
| C | 1.4832958  | 0.2839033  | -0.5186160 |
| N | 0.1320398  | 0.2782193  | -0.8411490 |
| C | -0.6814802 | 1.4437853  | -0.5627670 |
| C | -3.2488862 | 1.1822723  | -0.5093790 |
| C | -2.0002752 | 1.1236363  | 0.0670800  |

|    |            |            |            |
|----|------------|------------|------------|
| N  | -2.1889322 | 0.6710973  | 1.3588890  |
| C  | -4.1357992 | 0.7479033  | 0.4927880  |
| Au | 4.0134058  | -1.3866337 | -0.4361480 |
| C  | 8.0871718  | -0.8788677 | 0.7470340  |
| C  | 8.1632458  | -2.1828357 | 0.3920010  |
| H  | 8.8360038  | -0.2015567 | 1.1320580  |
| H  | 8.9910648  | -2.8772857 | 0.4041420  |
| C  | 6.0370168  | -1.5087257 | 0.0442760  |
| N  | 6.8996148  | -2.5491687 | -0.0348790 |
| N  | 6.7803028  | -0.4843037 | 0.5281480  |
| C  | -5.9339852 | -2.5218817 | 1.1842600  |
| F  | -6.5473952 | -1.4700397 | 1.7066120  |
| F  | -4.6319542 | -2.4273777 | 1.4453920  |
| F  | -6.4003172 | -3.6257227 | 1.7417050  |
| S  | -6.2315102 | -2.5375647 | -0.6291350 |
| O  | -7.6327482 | -2.8662327 | -0.7783850 |
| O  | -5.3036582 | -3.6962497 | -1.0362170 |
| O  | -5.7159242 | -1.2660657 | -1.1176110 |
| C  | 6.5485268  | -3.8764377 | -0.5043230 |
| H  | 5.4894558  | -3.8749107 | -0.7731480 |
| H  | 7.1438528  | -4.1378667 | -1.3843080 |
| H  | 6.7196128  | -4.6157987 | 0.2838510  |
| C  | 6.2802238  | 0.8581893  | 0.7803200  |
| H  | 6.8003368  | 1.5792773  | 0.1428430  |
| H  | 5.2097588  | 0.8871443  | 0.5549250  |
| H  | 6.4343408  | 1.1232633  | 1.8304650  |
| C  | -1.2516992 | 0.2005083  | 2.3232680  |

|   |            |            |           |
|---|------------|------------|-----------|
| C | -1.6263232 | -0.8883007 | 3.1170120 |
| C | 0.0146908  | 0.7622783  | 2.4717410 |
| C | -0.7308562 | -1.4102367 | 4.0402690 |
| H | -2.6192512 | -1.3087617 | 2.9881770 |
| C | 0.9115798  | 0.2120233  | 3.3815240 |
| H | 0.3360538  | 1.6136993  | 1.8825310 |
| C | 0.5460508  | -0.8707907 | 4.1717870 |
| H | -1.0325862 | -2.2571407 | 4.6520230 |
| H | 1.9040768  | 0.6483563  | 3.4657430 |
| H | 1.2498878  | -1.2930167 | 4.8846770 |
| H | -5.2100432 | 0.6298913  | 0.4305660 |
| N | -3.4994002 | 0.4316633  | 1.6060020 |

Zero-point correction= 0.629304 (Hartree/Particle)

Thermal correction to Energy= 0.676736

Thermal correction to Enthalpy= 0.677680

Thermal correction to Gibbs Free Energy= 0.543251

Sum of electronic and zero-point Energies= -2812.698834

Sum of electronic and thermal Energies= -2812.651403

Sum of electronic and thermal Enthalpies= -2812.650458

Sum of electronic and thermal Free Energies= -2812.784887

### **E-ts2**

|   |            |            |            |
|---|------------|------------|------------|
| H | -0.7707622 | -3.5328557 | -1.2222836 |
| H | -0.4142632 | -2.8753627 | -2.8140556 |
| H | 0.9149618  | -3.4693837 | -1.7876376 |
| H | 2.6598828  | 2.6005793  | -2.9760056 |
| H | 1.4508578  | 1.4714843  | -2.3350206 |
| H | 1.2220518  | 2.1992743  | -3.9387836 |

|   |            |            |            |
|---|------------|------------|------------|
| H | 0.7917088  | 4.6693593  | -0.4288056 |
| H | 1.5740108  | 3.0620843  | -0.2836526 |
| H | 2.4141908  | 4.3841823  | -1.0814896 |
| H | 0.4902808  | 5.6602403  | -2.7909976 |
| H | 0.5517498  | 4.5817853  | -4.2091796 |
| H | 2.0450208  | 5.0212013  | -3.3664376 |
| H | -1.1540112 | 3.7704853  | -2.9696326 |
| H | -4.8905812 | -2.9792027 | -1.9958606 |
| H | -1.6343362 | -1.2882967 | 0.7442924  |
| H | -3.6046822 | -2.5757187 | -0.1138426 |
| H | -2.9870542 | -0.8633767 | -4.0046996 |
| H | -0.9523822 | 0.3535463  | -3.2173006 |
| H | -0.1710162 | 2.3937203  | 0.3230494  |
| H | -3.6685202 | 0.6497273  | -0.5990236 |
| C | -0.0414752 | -2.9362107 | -1.7841006 |
| C | 1.5854478  | 2.3864643  | -2.9204426 |
| C | 1.4266718  | 3.9301333  | -0.9353626 |
| C | 0.9862828  | 4.7814503  | -3.2207236 |
| C | 0.8449788  | 3.5694363  | -2.3011156 |
| N | -0.6132012 | 3.3066483  | -2.2470936 |
| O | -2.6825592 | 2.7688113  | -1.5687416 |
| C | -1.4752782 | 2.6784993  | -1.4000456 |
| O | -4.2878942 | -2.5547237 | -2.6855606 |
| C | -2.0654232 | -1.0298257 | -0.2289616 |
| C | -3.0053962 | -1.9552357 | -0.7720176 |
| C | -3.3333152 | -1.8700677 | -2.1078126 |
| C | -2.6041422 | -0.9695597 | -2.9929606 |

|    |            |            |            |
|----|------------|------------|------------|
| C  | -1.5195902 | -0.3089637 | -2.5651046 |
| C  | -0.9815472 | -0.5268757 | -1.1863016 |
| C  | 0.1491398  | -1.5913777 | -1.1824536 |
| C  | 1.2436168  | -1.1332587 | -0.5438436 |
| O  | 1.6385078  | 0.9920323  | 0.5864624  |
| C  | 0.9652088  | 0.2466003  | -0.1088336 |
| N  | -0.2635562 | 0.6240883  | -0.6674736 |
| C  | -0.9304892 | 1.8390403  | -0.2379746 |
| C  | -3.0754292 | 0.5034503  | 0.2988754  |
| C  | -2.0312912 | 1.3991173  | 0.6650374  |
| N  | -1.9581752 | 1.3921103  | 1.9987854  |
| C  | -3.6398982 | 0.1414173  | 1.5821424  |
| Au | 3.0416118  | -1.9887897 | -0.0549656 |
| C  | 6.9298278  | -2.8457547 | 1.5105344  |
| C  | 6.7063678  | -4.0314987 | 0.8972204  |
| H  | 7.7733068  | -2.4893937 | 2.0843654  |
| H  | 7.3140868  | -4.9221717 | 0.8260794  |
| C  | 4.8954778  | -2.7322067 | 0.5395024  |
| N  | 5.4577028  | -3.9422237 | 0.3094074  |
| N  | 5.8122688  | -2.0647947 | 1.2809244  |
| C  | -6.1955812 | -3.0027007 | 1.7088044  |
| F  | -6.6911642 | -2.1409677 | 2.5926484  |
| F  | -4.8734292 | -3.0863517 | 1.9276084  |
| F  | -6.7275382 | -4.1943507 | 1.9258544  |
| S  | -6.5215292 | -2.4153127 | 0.0011234  |
| O  | -7.9710662 | -2.4085977 | -0.1104136 |
| O  | -5.8198672 | -3.4641697 | -0.7970176 |

|   |            |            |            |
|---|------------|------------|------------|
| O | -5.8317192 | -1.1150407 | -0.0301256 |
| C | 4.8347268  | -5.0113927 | -0.4493396 |
| H | 3.8557288  | -4.6653027 | -0.7898866 |
| H | 5.4487808  | -5.2682427 | -1.3176306 |
| H | 4.7046098  | -5.8968697 | 0.1798644  |
| C | 5.6501118  | -0.7078177 | 1.7767424  |
| H | 6.4293878  | -0.0602527 | 1.3640174  |
| H | 4.6698638  | -0.3337297 | 1.4671014  |
| H | 5.7093208  | -0.6979277 | 2.8690874  |
| H | -4.5119982 | -0.4844747 | 1.7372184  |
| C | -1.0135012 | 2.0449403  | 2.8380414  |
| C | -0.6518382 | 3.3645083  | 2.5778524  |
| C | -0.4718842 | 1.3461713  | 3.9114344  |
| C | 0.3034838  | 3.9751423  | 3.3805654  |
| H | -1.1368382 | 3.9131333  | 1.7721434  |
| C | 0.4688108  | 1.9745673  | 4.7167234  |
| H | -0.7968732 | 0.3271193  | 4.1000074  |
| C | 0.8660898  | 3.2813863  | 4.4472164  |
| H | 0.5931588  | 5.0036713  | 3.1812254  |
| H | 0.8979378  | 1.4364233  | 5.5578994  |
| H | 1.6075378  | 3.7649253  | 5.0781594  |
| N | -2.9536742 | 0.6216763  | 2.5829984  |

Zero-point correction= 0.629891 (Hartree/Particle)

Thermal correction to Energy= 0.676957

Thermal correction to Enthalpy= 0.677901

Thermal correction to Gibbs Free Energy= 0.541886

Sum of electronic and zero-point Energies= -2812.664525

Sum of electronic and thermal Energies= -2812.617458

Sum of electronic and thermal Enthalpies= -2812.616514

Sum of electronic and thermal Free Energies= -2812.752529

**E-int2**

|   |            |            |            |
|---|------------|------------|------------|
| H | -0.2036615 | -3.6880459 | -0.8578774 |
| H | 0.1598645  | -3.1180109 | -2.4772734 |
| H | 1.4971965  | -3.5227089 | -1.3672054 |
| H | 2.5610085  | 2.1472261  | -3.3714324 |
| H | 1.4392445  | 1.0958921  | -2.4885714 |
| H | 1.0524365  | 1.6184581  | -4.1430204 |
| H | 0.8875365  | 4.5126381  | -0.9492784 |
| H | 1.6033135  | 2.9054461  | -0.6245024 |
| H | 2.4644685  | 4.0674261  | -1.6261454 |
| H | 0.4025375  | 5.2011511  | -3.3570134 |
| H | 0.3695145  | 3.9652621  | -4.6430204 |
| H | 1.9150165  | 4.4956651  | -3.9614934 |
| H | -1.2525175 | 3.4146801  | -3.1216514 |
| H | -4.2457405 | -3.6655099 | -1.9191404 |
| H | -1.3363855 | -1.4511919 | 0.8608066  |
| H | -3.1189495 | -3.0004339 | 0.0295416  |
| H | -2.5181245 | -1.4328209 | -3.9138174 |
| H | -0.6738385 | 0.0435991  | -3.1398554 |
| H | -0.1866885 | 2.3194351  | 0.3609066  |
| H | -3.3560195 | 0.1733941  | -0.7762684 |
| C | 0.4996955  | -3.0749709 | -1.4351624 |
| C | 1.5007635  | 1.9317261  | -3.1917094 |
| C | 1.4663125  | 3.6850231  | -1.3814114 |



|    |            |            |            |
|----|------------|------------|------------|
| C  | 0.8703315  | 4.2764451  | -3.7169054 |
| C  | 0.8026405  | 3.1779601  | -2.6576474 |
| N  | -0.6513475 | 2.9354971  | -2.4583174 |
| O  | -2.6187255 | 2.7458521  | -1.3824314 |
| C  | -1.4141525 | 2.5015331  | -1.4275524 |
| O  | -3.6464675 | -3.2432589 | -2.5923414 |
| C  | -1.7980745 | -1.2117849 | -0.1086884 |
| C  | -2.5805495 | -2.3484719 | -0.6511724 |
| C  | -2.8268895 | -2.3955979 | -1.9834084 |
| C  | -2.1680585 | -1.4473309 | -2.8838754 |
| C  | -1.1819485 | -0.6422529 | -2.4644934 |
| C  | -0.6663775 | -0.7393149 | -1.0542964 |
| C  | 0.5438375  | -1.6791979 | -0.9288794 |
| C  | 1.5722965  | -1.0881449 | -0.2837104 |
| O  | 1.7324495  | 1.1389791  | 0.7052126  |
| C  | 1.1615505  | 0.2840281  | 0.0436766  |
| N  | -0.0795225 | 0.5119841  | -0.5737744 |
| C  | -0.8447365 | 1.6887741  | -0.2590234 |
| C  | -2.7879575 | 0.0291411  | 0.1538196  |
| C  | -2.0257265 | 1.2207291  | 0.5282836  |
| N  | -2.3905015 | 1.5768881  | 1.7313536  |
| C  | -3.6378815 | -0.1344109 | 1.3546936  |
| Au | 3.4002795  | -1.7952249 | 0.3182236  |
| C  | 7.2712725  | -2.4710489 | 2.0284706  |
| C  | 7.1008245  | -3.6774939 | 1.4390096  |
| H  | 8.0863605  | -2.0754609 | 2.6174076  |
| H  | 7.7360405  | -4.5511239 | 1.4078936  |

|   |            |            |            |
|---|------------|------------|------------|
| C | 5.2636285  | -2.4418649 | 0.9960176  |
| N | 5.8680055  | -3.6399169 | 0.8131116  |
| N | 6.1385105  | -1.7299559 | 1.7464876  |
| C | -5.7718875 | -3.4860349 | 1.7877696  |
| F | -6.4385385 | -2.6331319 | 2.5619466  |
| F | -4.4635105 | -3.3286219 | 2.0609696  |
| F | -6.1144845 | -4.7208219 | 2.1163796  |
| S | -6.0972985 | -3.1304599 | 0.0163886  |
| O | -7.5296015 | -3.3387639 | -0.1327324 |
| O | -5.2253625 | -4.1369249 | -0.6452404 |
| O | -5.6035905 | -1.7475979 | -0.1171454 |
| C | 5.3001185  | -4.7467059 | 0.0647706  |
| H | 4.3230665  | -4.4389879 | -0.3162104 |
| H | 5.9490945  | -5.0085599 | -0.7761994 |
| H | 5.1747135  | -5.6184629 | 0.7137786  |
| C | 5.9205295  | -0.3677219 | 2.2029576  |
| H | 6.6973965  | 0.2922861  | 1.8056066  |
| H | 4.9436785  | -0.0307439 | 1.8448686  |
| H | 5.9349765  | -0.3301239 | 3.2962576  |
| H | -4.4063875 | -0.8961779 | 1.4678716  |
| C | -1.9570205 | 2.6981651  | 2.4937116  |
| C | -1.7953035 | 3.9253491  | 1.8554556  |
| C | -1.7343495 | 2.5423391  | 3.8574626  |
| C | -1.3582645 | 5.0124311  | 2.6024846  |
| H | -2.0559325 | 4.0257621  | 0.8030046  |
| C | -1.3057595 | 3.6411001  | 4.5897596  |
| H | -1.9032715 | 1.5750291  | 4.3215696  |

|   |            |           |           |
|---|------------|-----------|-----------|
| C | -1.1098805 | 4.8701621 | 3.9641376 |
| H | -1.2319285 | 5.9783101 | 2.1208066 |
| H | -1.1241595 | 3.5367521 | 5.6560056 |
| H | -0.7749915 | 5.7254791 | 4.5453436 |
| N | -3.3981455 | 0.7373891 | 2.2756726 |

Zero-point correction= 0.631212 (Hartree/Particle)

Thermal correction to Energy= 0.678369

Thermal correction to Enthalpy= 0.679313

Thermal correction to Gibbs Free Energy= 0.544575

Sum of electronic and zero-point Energies= -2812.667134

Sum of electronic and thermal Energies= -2812.619977

Sum of electronic and thermal Enthalpies= -2812.619033

Sum of electronic and thermal Free Energies= -2812.753771

### **E-ts3**

|   |            |            |            |
|---|------------|------------|------------|
| H | -2.5784064 | 1.6839304  | -1.3941031 |
| H | -2.0979824 | 0.9116004  | -2.8977571 |
| H | -3.2403854 | 0.0949024  | -1.8097121 |
| H | 1.8478946  | -3.4722836 | -3.0770621 |
| H | 1.1829536  | -1.9918696 | -2.3593061 |
| H | 2.0204086  | -1.9232556 | -3.9264781 |
| H | 4.3177806  | -2.6294676 | -0.3440161 |
| H | 2.5340766  | -2.7961106 | -0.2877521 |
| H | 3.5049186  | -3.9985396 | -1.1228511 |
| H | 5.4615936  | -2.5339796 | -2.6481591 |
| H | 4.4989726  | -2.1194616 | -4.0911511 |
| H | 4.3516196  | -3.7239946 | -3.3603261 |
| H | 4.2183046  | -0.3086606 | -2.7707991 |

|   |            |            |            |
|---|------------|------------|------------|
| H | -1.5780784 | 4.8302594  | -1.7973511 |
| H | -0.9069744 | 1.4717394  | 0.7441909  |
| H | -0.9001084 | 3.8994374  | 0.2093039  |
| H | 0.6696986  | 2.9462114  | -3.6691591 |
| H | 1.1057236  | 0.6004224  | -2.9818011 |
| H | 2.6130586  | -0.9476416 | 0.5592809  |
| H | 1.1782176  | 3.1167584  | 0.1045139  |
| C | -2.3359994 | 0.7106134  | -1.8446611 |
| C | 2.0196686  | -2.3982846 | -2.9369471 |
| C | 3.4251266  | -2.9257456 | -0.9113731 |
| C | 4.4873256  | -2.6608116 | -3.1356501 |
| C | 3.3555966  | -2.1700946 | -2.2344951 |
| N | 3.6154216  | -0.7175726 | -2.0638601 |
| O | 3.7526786  | 1.3710254  | -1.2487601 |
| C | 3.2869486  | 0.2372184  | -1.1616201 |
| O | -0.7766004 | 4.5802644  | -2.3203191 |
| C | -0.0923294 | 1.8203614  | 0.1010989  |
| C | -0.3496764 | 3.2147854  | -0.4337441 |
| C | -0.2805524 | 3.4858974  | -1.7817981 |
| C | 0.4064496  | 2.5749654  | -2.6823341 |
| C | 0.6336586  | 1.3109434  | -2.3037401 |
| C | 0.1277306  | 0.7487914  | -1.0083761 |
| C | -1.2090694 | 0.0254464  | -1.1601321 |
| C | -1.2104954 | -1.1386706 | -0.4717871 |
| O | 0.6220716  | -2.2410846 | 0.7332659  |
| C | 0.1630626  | -1.3624266 | 0.0250369  |
| N | 0.9701876  | -0.3203916 | -0.4943321 |

|    |            |            |            |
|----|------------|------------|------------|
| C  | 2.3075056  | -0.0606446 | -0.0174951 |
| C  | 1.1777536  | 2.0546604  | 0.8921799  |
| C  | 2.2522386  | 1.1283054  | 0.8968549  |
| N  | 2.9840446  | 1.3835834  | 1.9764329  |
| C  | 1.3471676  | 2.7428894  | 2.1572809  |
| Au | -2.9994944 | -1.9453306 | 0.1515889  |
| C  | -6.8910504 | -3.1998156 | 1.5114819  |
| C  | -7.1103614 | -1.8888376 | 1.2509339  |
| H  | -7.5477724 | -3.9730616 | 1.8834449  |
| H  | -8.0013994 | -1.2845646 | 1.3435459  |
| C  | -4.9499604 | -2.3147156 | 0.7774079  |
| N  | -5.9140024 | -1.3626566 | 0.8068009  |
| N  | -5.5615774 | -3.4406596 | 1.2146749  |
| C  | -3.6091804 | 3.1873434  | 1.3315899  |
| F  | -2.6844864 | 3.9778674  | 1.8863259  |
| F  | -3.0206494 | 1.9974064  | 1.1024949  |
| F  | -4.5748424 | 2.9858114  | 2.2176009  |
| S  | -4.2787154 | 3.8958274  | -0.2311751 |
| O  | -5.0166324 | 5.0683224  | 0.2180739  |
| O  | -5.0460364 | 2.7643374  | -0.7601011 |
| O  | -3.0350964 | 4.1849794  | -0.9876171 |
| C  | -5.7364314 | 0.0240264  | 0.3801559  |
| H  | -4.6899134 | 0.3122534  | 0.4950869  |
| H  | -6.0194394 | 0.1531414  | -0.6680631 |
| H  | -6.3480714 | 0.6841454  | 0.9997069  |
| C  | -4.9081854 | -4.7262886 | 1.3624969  |
| H  | -5.3950254 | -5.4753146 | 0.7303379  |

|   |            |            |           |
|---|------------|------------|-----------|
| H | -3.8652384 | -4.6178486 | 1.0550449 |
| H | -4.9436824 | -5.0541096 | 2.4060049 |
| H | 0.7216286  | 3.5340044  | 2.5591519 |
| C | 4.1619826  | 0.7205924  | 2.4306289 |
| C | 5.1915796  | 0.4417574  | 1.5370709 |
| C | 4.2434286  | 0.3686264  | 3.7752639 |
| C | 6.3126886  | -0.2374256 | 2.0027299 |
| H | 5.1259296  | 0.7949214  | 0.5106129 |
| C | 5.3730676  | -0.3005756 | 4.2242309 |
| H | 3.4265356  | 0.6222484  | 4.4447089 |
| C | 6.4032696  | -0.6112386 | 3.3392619 |
| H | 7.1269796  | -0.4572386 | 1.3171669 |
| H | 5.4471976  | -0.5855316 | 5.2703159 |
| H | 7.2841696  | -1.1381656 | 3.6970569 |
| N | 2.4455876  | 2.3917474  | 2.7637259 |

Zero-point correction= 0.628079 (Hartree/Particle)

Thermal correction to Energy= 0.674071

Thermal correction to Enthalpy= 0.675015

Thermal correction to Gibbs Free Energy= 0.546632

Sum of electronic and zero-point Energies= -2812.617657

Sum of electronic and thermal Energies= -2812.571666

Sum of electronic and thermal Enthalpies= -2812.570721

Sum of electronic and thermal Free Energies= -2812.699105

### **E-int3**

|   |            |            |           |
|---|------------|------------|-----------|
| H | 0.2552838  | -4.1237257 | 0.1264391 |
| H | 0.3170368  | -3.5010127 | 1.7813571 |
| H | -1.2351352 | -4.0028407 | 1.0705931 |

|   |            |            |            |
|---|------------|------------|------------|
| H | -0.8247672 | 5.8588033  | 2.0679101  |
| H | 0.5521048  | 4.8747973  | 1.5039211  |
| H | -0.5855792 | 5.5633643  | 0.3277261  |
| H | -1.9174122 | 2.3518543  | 2.8736291  |
| H | -0.2654052 | 2.9923263  | 3.0716701  |
| H | -1.6688642 | 3.9714533  | 3.5640261  |
| H | -3.4468482 | 3.3080153  | 1.1198991  |
| H | -2.8867322 | 4.6349283  | 0.0724101  |
| H | -3.2089672 | 4.9351123  | 1.7930401  |
| H | -1.6200332 | 2.4508103  | -0.1838879 |
| H | 5.5289098  | -2.9435867 | 1.4473121  |
| H | 1.3930768  | -1.9856297 | -1.5298569 |
| H | 2.2915788  | -3.4007187 | 0.2481801  |
| H | 2.4964098  | -0.8175847 | 3.1848331  |
| H | 0.3199408  | -0.1513027 | 2.2206861  |
| H | -0.1175972 | 1.6283073  | -1.6006649 |
| C | -0.2821182 | -3.5060977 | 0.8607021  |
| C | -0.5006682 | 5.1174623  | 1.3267161  |
| C | -1.2969152 | 3.2558703  | 2.8199681  |
| C | -2.8132492 | 4.2040503  | 1.0788841  |
| C | -1.3686522 | 3.8654513  | 1.4218131  |
| N | -0.9202262 | 2.8916463  | 0.4128081  |
| O | 1.2123228  | 2.5556613  | 1.1913851  |
| C | 0.3084978  | 2.3265583  | 0.4016111  |
| O | 4.2629808  | -2.1832837 | 1.9339951  |
| C | 1.7922028  | -1.4749477 | -0.6393309 |
| C | 2.7558318  | -2.4184187 | 0.0798841  |

|    |            |            |            |
|----|------------|------------|------------|
| C  | 3.1730158  | -1.9055047 | 1.4298211  |
| C  | 2.2061938  | -1.1106127 | 2.1789771  |
| C  | 1.0333808  | -0.7409167 | 1.6422151  |
| C  | 0.5862088  | -1.0940387 | 0.2496031  |
| C  | -0.5336892 | -2.1332527 | 0.3432641  |
| C  | -1.7141122 | -1.6295507 | -0.0718499 |
| O  | -2.2777752 | 0.5953073  | -0.9256329 |
| C  | -1.4750282 | -0.2332887 | -0.4970619 |
| N  | -0.1338932 | 0.0284353  | -0.3333089 |
| C  | 0.4654968  | 1.2884963  | -0.7307719 |
| C  | 2.4968578  | -0.2083707 | -1.0301099 |
| C  | 1.8859118  | 1.0229223  | -1.0723129 |
| N  | 2.8468028  | 1.9371393  | -1.3793169 |
| C  | 3.8532278  | 0.0647293  | -1.3185189 |
| Au | -3.6157522 | -2.3690627 | -0.2530749 |
| C  | -7.7842432 | -2.7418587 | -1.1173239 |
| C  | -7.5897572 | -3.9918357 | -0.6355139 |
| H  | -8.6709142 | -2.2568497 | -1.4998639 |
| H  | -8.2710482 | -4.8212637 | -0.5108019 |
| C  | -5.6100452 | -2.9108567 | -0.5350569 |
| N  | -6.2541872 | -4.0751507 | -0.2849379 |
| N  | -6.5639372 | -2.0962487 | -1.0477549 |
| C  | 5.8370698  | -5.2448977 | -0.5273639 |
| F  | 5.8933248  | -5.5584317 | -1.8089019 |
| F  | 4.5642008  | -5.1504167 | -0.1541989 |
| F  | 6.4316698  | -6.1795397 | 0.1873181  |
| S  | 6.6595958  | -3.6235067 | -0.2689009 |



|   |            |            |            |
|---|------------|------------|------------|
| O | 8.0661158  | -3.8309617 | -0.4967439 |
| O | 6.3969328  | -3.4435927 | 1.2618291  |
| O | 5.8818098  | -2.6703037 | -1.0404379 |
| C | -5.6288122 | -5.2579157 | 0.2760641  |
| H | -4.5725092 | -5.0370917 | 0.4474131  |
| H | -6.1010592 | -5.5232087 | 1.2267621  |
| H | -5.7134572 | -6.0983247 | -0.4194289 |
| C | -6.3423002 | -0.7241737 | -1.4773549 |
| H | -6.9871222 | -0.0458197 | -0.9109169 |
| H | -5.2957942 | -0.4596867 | -1.2977979 |
| H | -6.5586772 | -0.6254857 | -2.5451949 |
| H | 3.6510448  | -2.5988327 | -0.5244459 |
| H | 4.6859428  | -0.6295757 | -1.3817789 |
| N | 4.0602588  | 1.3576513  | -1.5238029 |
| C | 2.7284908  | 3.3487983  | -1.4184519 |
| C | 1.6234218  | 3.9449733  | -2.0195769 |
| C | 3.7231608  | 4.1268343  | -0.8320349 |
| C | 1.4990558  | 5.3302313  | -2.0046089 |
| H | 0.8775478  | 3.3315223  | -2.5194559 |
| C | 3.5958218  | 5.5088333  | -0.8359849 |
| H | 4.5748348  | 3.6307643  | -0.3766959 |
| C | 2.4815838  | 6.1152713  | -1.4118409 |
| H | 0.6349838  | 5.7951263  | -2.4739139 |
| H | 4.3691798  | 6.1179543  | -0.3741949 |
| H | 2.3839638  | 7.1981113  | -1.4036899 |

Zero-point correction= 0.632458 (Hartree/Particle)

Thermal correction to Energy= 0.679619

Thermal correction to Enthalpy= 0.680563

Thermal correction to Gibbs Free Energy= 0.544830

Sum of electronic and zero-point Energies= -2812.735983

Sum of electronic and thermal Energies= -2812.688822

Sum of electronic and thermal Enthalpies= -2812.687878

Sum of electronic and thermal Free Energies= -2812.823611

#### **E-int4**

|   |            |            |            |
|---|------------|------------|------------|
| H | -1.9723545 | 1.2236543  | 3.5422290  |
| H | -1.7900795 | 2.4773843  | 2.3067090  |
| H | -3.2126455 | 1.4071333  | 2.2986260  |
| H | 4.7488785  | 1.2168683  | -3.8358080 |
| H | 5.0694395  | 0.0546823  | -2.5236850 |
| H | 3.6030255  | -0.1109027 | -3.5201400 |
| H | 3.9752435  | 3.1005863  | -0.6658290 |
| H | 5.2866865  | 1.9106113  | -0.8754720 |
| H | 4.9667975  | 3.1168953  | -2.1380220 |
| H | 1.9085175  | 2.9537383  | -2.0874140 |
| H | 1.6999425  | 1.6128843  | -3.2433080 |
| H | 2.8642135  | 2.9169823  | -3.5854460 |
| H | 3.2131525  | 0.8987073  | -0.0570470 |
| H | 0.3062825  | -0.4884887 | 3.3312460  |
| H | 0.0393815  | 1.8548573  | 3.9656150  |
| H | 1.4609295  | 3.7045463  | 0.8872230  |
| H | 0.1793335  | 1.9168013  | -0.2458330 |
| H | 1.4260895  | -2.1016387 | -0.2432300 |
| C | -2.1331855 | 1.4480473  | 2.4782130  |
| C | 4.2811505  | 0.6085473  | -3.0515120 |

|    |            |            |            |
|----|------------|------------|------------|
| C  | 4.4937725  | 2.4642753  | -1.3959140 |
| C  | 2.4289505  | 2.2938893  | -2.7943450 |
| C  | 3.5242335  | 1.5090263  | -2.0789580 |
| N  | 2.9304625  | 0.6908553  | -1.0065040 |
| O  | 1.5940055  | -0.6575207 | -2.2781960 |
| C  | 2.0549885  | -0.3250747 | -1.1996320 |
| O  | 2.3401195  | 3.5100613  | 3.3281390  |
| C  | 0.8813935  | 0.2570763  | 2.7588060  |
| C  | 1.0214215  | 1.5293673  | 3.5963760  |
| C  | 1.6052445  | 2.6867033  | 2.8162970  |
| C  | 1.1788245  | 2.7905603  | 1.4078450  |
| C  | 0.4947445  | 1.8146933  | 0.7960090  |
| C  | 0.0996175  | 0.5126673  | 1.4421510  |
| C  | -1.4210335 | 0.4690873  | 1.6120130  |
| C  | -1.9710965 | -0.5314327 | 0.8903180  |
| O  | -0.9219085 | -2.3044477 | -0.4176340 |
| C  | -0.8647805 | -1.2736807 | 0.2289370  |
| N  | 0.3069775  | -0.5886777 | 0.5117150  |
| C  | 1.6038665  | -1.0669027 | 0.0831350  |
| C  | 2.2309925  | -0.3072097 | 2.4222800  |
| C  | 2.5354975  | -0.9446957 | 1.2394190  |
| N  | 3.8665115  | -1.2609247 | 1.2870640  |
| C  | 3.4528165  | -0.2866407 | 3.1305820  |
| Au | -3.8682185 | -1.2885767 | 0.6101240  |
| C  | -7.1369735 | -3.6743367 | -0.7321440 |
| C  | -7.8528135 | -2.6242077 | -0.2645240 |
| H  | -7.4476915 | -4.5907347 | -1.2129350 |

|   |            |            |            |
|---|------------|------------|------------|
| H | -8.9159685 | -2.4315307 | -0.2627300 |
| C | -5.6796125 | -2.1887237 | 0.1330200  |
| N | -6.9436845 | -1.7285617 | 0.2650480  |
| N | -5.8083925 | -3.3888187 | -0.4814870 |
| C | -4.6942355 | 3.7077383  | -1.2728870 |
| F | -3.9367825 | 4.4866443  | -0.5268100 |
| F | -5.9418945 | 4.1448043  | -1.2517780 |
| F | -4.2469235 | 3.6915053  | -2.5113490 |
| S | -4.7138705 | 2.0015493  | -0.5852330 |
| O | -3.1575605 | 1.7565193  | -0.7494340 |
| O | -5.4944575 | 1.1849043  | -1.4912090 |
| O | -5.0865375 | 2.1022703  | 0.8135080  |
| C | -7.2966995 | -0.4234337 | 0.7999150  |
| H | -6.4721435 | -0.0564057 | 1.4151290  |
| H | -7.4588485 | 0.2884023  | -0.0153300 |
| H | -8.1996105 | -0.5127887 | 1.4101730  |
| C | -4.7029125 | -4.2690047 | -0.8261590 |
| H | -4.7993345 | -4.5891957 | -1.8673610 |
| H | -3.7610885 | -3.7248117 | -0.7077490 |
| H | -4.6961075 | -5.1474087 | -0.1735970 |
| H | 1.6451815  | 1.3618493  | 4.4811460  |
| H | -2.8597585 | 0.9496743  | -0.2426200 |
| C | 4.6951385  | -1.7590167 | 0.2472490  |
| C | 5.9892225  | -1.2545267 | 0.1253030  |
| C | 4.2188655  | -2.7125867 | -0.6486280 |
| C | 6.7997705  | -1.7003037 | -0.9103570 |
| H | 6.3376005  | -0.5244557 | 0.8502210  |

|   |           |            |            |
|---|-----------|------------|------------|
| C | 5.0338745 | -3.1365337 | -1.6924880 |
| H | 3.2255915 | -3.1353317 | -0.5268230 |
| C | 6.3231045 | -2.6334737 | -1.8283850 |
| H | 7.8095225 | -1.3080867 | -1.0051880 |
| H | 4.6559675 | -3.8737177 | -2.3960230 |
| H | 6.9573355 | -2.9706397 | -2.6442720 |
| H | 3.6605515 | 0.1220303  | 4.1134950  |
| N | 4.4339775 | -0.8536327 | 2.4461540  |

Zero-point correction= 0.630929 (Hartree/Particle)

Thermal correction to Energy= 0.678595

Thermal correction to Enthalpy= 0.679539

Thermal correction to Gibbs Free Energy= 0.543752

Sum of electronic and zero-point Energies= -2812.726750

Sum of electronic and thermal Energies= -2812.679083

Sum of electronic and thermal Enthalpies= -2812.678139

Sum of electronic and thermal Free Energies= -2812.813927

#### **E-ts4**

|   |            |           |            |
|---|------------|-----------|------------|
| H | -2.3789219 | 0.9675874 | 3.0663660  |
| H | -1.7315429 | 2.4699384 | 2.3914560  |
| H | -3.2709569 | 1.7813104 | 1.7787690  |
| H | 5.4793931  | 2.0636474 | -3.0786310 |
| H | 5.4470361  | 0.5542434 | -2.1323980 |
| H | 4.1726651  | 0.8812584 | -3.3328770 |
| H | 4.3445701  | 3.1182134 | 0.3503330  |
| H | 5.5579501  | 1.8609604 | -0.0079450 |
| H | 5.5703531  | 3.3937374 | -0.9030310 |
| H | 2.5546211  | 3.6496344 | -1.3267680 |

|   |            |            |            |
|---|------------|------------|------------|
| H | 2.4110591  | 2.7002274  | -2.8288910 |
| H | 3.7382171  | 3.8716674  | -2.6328470 |
| H | 3.3151451  | 0.9377864  | 0.1879990  |
| H | -0.2315959 | -0.9515026 | 2.6161370  |
| H | -0.3572779 | 1.0975844  | 3.9444810  |
| H | 1.7850331  | 3.5444874  | 1.8411890  |
| H | 0.5288981  | 2.4228394  | 0.0303990  |
| H | 1.2559701  | -1.5894246 | -1.0883850 |
| C | -2.2620849 | 1.5445174  | 2.1373890  |
| C | 4.8226891  | 1.3388554  | -2.5814300 |
| C | 4.9195921  | 2.6365384  | -0.4521540 |
| C | 3.1181561  | 3.1306304  | -2.1136180 |
| C | 3.9969911  | 2.0414414  | -1.5072190 |
| N | 3.1526751  | 1.0574424  | -0.8038520 |
| O | 1.9236871  | 0.2970984  | -2.5751080 |
| C | 2.2306751  | 0.2611114  | -1.3966700 |
| O | 2.1859121  | 2.4854694  | 4.1813200  |
| C | 0.5072031  | -0.1624056 | 2.3995490  |
| C | 0.6330641  | 0.7525884  | 3.6175640  |
| C | 1.4665141  | 1.9842604  | 3.3394320  |
| C | 1.3104661  | 2.5766964  | 1.9955850  |
| C | 0.6386211  | 1.9617884  | 1.0140610  |
| C | -0.0056579 | 0.6055214  | 1.1471800  |
| C | -1.5250409 | 0.7414834  | 1.1337530  |
| C | -2.0686759 | 0.0645084  | 0.0886670  |
| O | -1.0370169 | -1.4297066 | -1.5411780 |
| C | -0.9646249 | -0.6125016 | -0.6445180 |

|    |            |            |            |
|----|------------|------------|------------|
| N  | 0.2170361  | -0.1863216 | -0.0563340 |
| C  | 1.5025561  | -0.7273806 | -0.4520060 |
| C  | 1.8273731  | -0.7922226 | 2.0657080  |
| C  | 2.2480031  | -1.0846836 | 0.7866580  |
| N  | 3.5143791  | -1.5920806 | 0.8899640  |
| C  | 2.9166611  | -1.1621656 | 2.8846810  |
| Au | -3.8647209 | -1.1319136 | 0.1352140  |
| C  | -6.7409269 | -4.2045336 | -0.3562070 |
| C  | -7.5559039 | -3.2193216 | 0.0920540  |
| H  | -6.9502809 | -5.2190426 | -0.6629240 |
| H  | -8.6251939 | -3.1950416 | 0.2443590  |
| C  | -5.4670429 | -2.4012506 | 0.0652220  |
| N  | -6.7567739 | -2.1237406 | 0.3495560  |
| N  | -5.4617899 | -3.6826846 | -0.3684480 |
| C  | -5.4219249 | 3.6681524  | -1.1168900 |
| F  | -4.6142799 | 4.4485314  | -0.4141950 |
| F  | -6.6788329 | 3.9621244  | -0.8145630 |
| F  | -5.2224279 | 3.8785974  | -2.4062770 |
| S  | -5.1128869 | 1.9072634  | -0.7017410 |
| O  | -3.6575499 | 1.7858414  | -1.1119570 |
| O  | -6.0327189 | 1.1387324  | -1.5332630 |
| O  | -5.2926739 | 1.8152874  | 0.7516030  |
| C  | -7.2548579 | -0.8143316 | 0.7574310  |
| H  | -6.4911089 | -0.3015516 | 1.3465450  |
| H  | -7.4612499 | -0.1973716 | -0.1229510 |
| H  | -8.1576939 | -0.9531146 | 1.3571110  |
| C  | -4.2768799 | -4.4171406 | -0.7801480 |

|   |            |            |            |
|---|------------|------------|------------|
| H | -4.4949359 | -4.9784116 | -1.6926120 |
| H | -3.4715149 | -3.7059846 | -0.9849350 |
| H | -3.9593969 | -5.1082726 | 0.0066750  |
| H | 1.0733401  | 0.2249064  | 4.4704500  |
| H | -2.9735419 | 0.8229184  | -0.5312750 |
| C | 4.4400851  | -1.8815676 | -0.1484170 |
| C | 5.7825881  | -1.5598056 | 0.0461240  |
| C | 4.0127571  | -2.4517716 | -1.3445130 |
| C | 6.6951221  | -1.8018886 | -0.9723610 |
| H | 6.0876521  | -1.1314696 | 0.9965470  |
| C | 4.9332261  | -2.6705096 | -2.3636450 |
| H | 2.9737021  | -2.7389576 | -1.4791240 |
| C | 6.2735351  | -2.3475446 | -2.1828140 |
| H | 7.7428371  | -1.5534796 | -0.8211990 |
| H | 4.5956341  | -3.1062336 | -3.3002530 |
| H | 6.9896251  | -2.5241446 | -2.9812580 |
| H | 3.0078161  | -1.0988606 | 3.9635070  |
| N | 3.9294201  | -1.6370956 | 2.1767940  |

Zero-point correction= 0.626053 (Hartree/Particle)

Thermal correction to Energy= 0.673042

Thermal correction to Enthalpy= 0.673986

Thermal correction to Gibbs Free Energy= 0.540726

Sum of electronic and zero-point Energies= -2812.716693

Sum of electronic and thermal Energies= -2812.669704

Sum of electronic and thermal Enthalpies= -2812.668760

Sum of electronic and thermal Free Energies= -2812.802020

**E-2**



|   |            |            |            |
|---|------------|------------|------------|
| H | 3.4546773  | -3.2088464 | -0.0997807 |
| H | 2.2152513  | -4.3351414 | -0.6747167 |
| H | 3.3265403  | -3.5530404 | -1.8290327 |
| H | -4.6630627 | -2.7747954 | -3.2618337 |
| H | -2.8879257 | -2.7432614 | -3.1894357 |
| H | -3.8413227 | -2.8329814 | -1.6846867 |
| H | -3.7525017 | 0.8032636  | -3.9974667 |
| H | -2.8013177 | -0.6097324 | -4.5164667 |
| H | -4.5720597 | -0.6345054 | -4.6393487 |
| H | -5.1227337 | 0.7057836  | -1.8949647 |
| H | -5.1978057 | -0.7864174 | -0.9338927 |
| H | -5.9914307 | -0.7136414 | -2.5278777 |
| H | -1.9381697 | 0.1065706  | -2.3940387 |
| H | 2.1412003  | -0.9335444 | 1.1997793  |
| H | 2.4982273  | -3.2410014 | 1.7914153  |
| H | -1.0807177 | -4.7331434 | 1.1107293  |
| H | -0.8889527 | -3.2436924 | -0.8482777 |
| H | -0.9864347 | 0.9221466  | -0.5551767 |
| C | 2.7454393  | -3.4044484 | -0.9142267 |
| C | -3.8040337 | -2.4023774 | -2.6900807 |
| C | -3.7309517 | -0.2935724 | -4.0254547 |
| C | -5.1167057 | -0.3900844 | -1.9501557 |
| C | -3.8369137 | -0.8777794 | -2.6231177 |
| N | -2.6689677 | -0.3778354 | -1.8755187 |
| O | -3.0928097 | -1.3728974 | 0.1488873  |
| C | -2.3985617 | -0.6899574 | -0.5850367 |
| O | 0.3380793  | -4.4861494 | 3.2607753  |

|    |            |            |            |
|----|------------|------------|------------|
| C  | 1.2320973  | -1.5392064 | 1.3470683  |
| C  | 1.6020383  | -2.7537314 | 2.1984723  |
| C  | 0.4990543  | -3.7811374 | 2.2830543  |
| C  | -0.3507857 | -3.9271494 | 1.0826133  |
| C  | -0.2523157 | -3.1106044 | 0.0293723  |
| C  | 0.7147833  | -1.9546334 | -0.0553597 |
| C  | 1.7971613  | -2.2770444 | -1.0776267 |
| C  | 1.7080993  | -1.4312484 | -2.1165357 |
| O  | 0.2075833  | 0.4384406  | -2.6163167 |
| C  | 0.6115913  | -0.4816734 | -1.9041747 |
| N  | 0.0591323  | -0.8136064 | -0.6935457 |
| C  | -1.0536707 | -0.0862994 | -0.1216267 |
| C  | 0.1618673  | -0.7179524 | 2.0101603  |
| C  | -0.8636257 | -0.0778254 | 1.3510453  |
| C  | -0.1088997 | -0.4781544 | 3.3752913  |
| Au | 3.4763613  | 1.3160196  | -0.1867447 |
| C  | 1.8258753  | 5.1843546  | -0.0188497 |
| C  | 3.1074233  | 5.4502046  | 0.3315453  |
| H  | 0.9655843  | 5.8304346  | -0.1146987 |
| H  | 3.5963443  | 6.3774346  | 0.5923483  |
| C  | 2.9511863  | 3.2444236  | -0.0533557 |
| N  | 3.7836263  | 4.2460526  | 0.3098123  |
| N  | 1.7512123  | 3.8257746  | -0.2552027 |
| C  | 6.5532423  | -1.7153124 | -0.2152717 |
| F  | 6.0882563  | -2.7386274 | -0.9191427 |
| F  | 7.5528773  | -2.1276334 | 0.5460153  |
| F  | 6.9950283  | -0.7822674 | -1.0472187 |

|   |            |            |            |
|---|------------|------------|------------|
| S | 5.2202513  | -1.0269314 | 0.8410613  |
| O | 4.1957073  | -0.6804744 | -0.2359487 |
| O | 5.7908553  | 0.1553646  | 1.4779603  |
| O | 4.7689023  | -2.1371174 | 1.6703893  |
| C | 5.2006543  | 4.0843116  | 0.6059113  |
| H | 5.4886353  | 4.8051366  | 1.3749043  |
| H | 5.3804433  | 3.0715396  | 0.9781663  |
| H | 5.8006253  | 4.2488266  | -0.2939607 |
| C | 0.5347493  | 3.0911886  | -0.5673557 |
| H | 0.7071713  | 2.3901516  | -1.3922787 |
| H | 0.2068813  | 2.5372706  | 0.3210463  |
| H | -0.2418687 | 3.8028916  | -0.8584517 |
| H | 1.8781853  | -2.4533904 | 3.2148933  |
| H | 2.3409193  | -1.4129724 | -2.9966787 |
| N | -1.6632507 | 0.4953096  | 2.2990063  |
| N | -1.2025337 | 0.2469966  | 3.5464583  |
| H | 0.4513483  | -0.8074824 | 4.2432613  |
| C | -2.9114437 | 1.1502716  | 2.1455553  |
| C | -3.1718047 | 1.9565276  | 1.0393853  |
| C | -3.8835397 | 0.9735666  | 3.1282743  |
| C | -4.4180357 | 2.5582936  | 0.9027003  |
| H | -2.4052127 | 2.1307446  | 0.2885063  |
| C | -5.1173497 | 1.5933206  | 2.9899353  |
| H | -3.6521257 | 0.3469736  | 3.9836753  |
| C | -5.3952897 | 2.3795086  | 1.8749223  |
| H | -4.6175427 | 3.1809196  | 0.0334233  |
| H | -5.8745657 | 1.4486466  | 3.7567083  |

|   |            |           |           |
|---|------------|-----------|-----------|
| H | -6.3679277 | 2.8526566 | 1.7664003 |
|---|------------|-----------|-----------|

Zero-point correction= 0.632876 (Hartree/Particle)

Thermal correction to Energy= 0.680003

Thermal correction to Enthalpy= 0.680947

Thermal correction to Gibbs Free Energy= 0.546441

Sum of electronic and zero-point Energies= -2812.760822

Sum of electronic and thermal Energies= -2812.713695

Sum of electronic and thermal Enthalpies= -2812.712751

Sum of electronic and thermal Free Energies= -2812.847257

### F-1

|    |            |            |            |
|----|------------|------------|------------|
| Au | -4.8512743 | -0.2665514 | 0.1415812  |
| C  | -7.8657073 | 1.0347106  | -2.5104438 |
| C  | -8.6483093 | 0.8394096  | -1.4224028 |
| H  | -8.1045243 | 1.3793346  | -3.5062768 |
| H  | -9.7092293 | 0.9783016  | -1.2725748 |
| C  | -6.5433053 | 0.3102156  | -0.8524288 |
| N  | -7.8172763 | 0.3949216  | -0.4117828 |
| N  | -6.5765943 | 0.7055296  | -2.1427728 |
| C  | 6.4340837  | -0.5975004 | -1.0022688 |
| F  | 6.4764807  | -1.5337504 | -0.0540908 |
| F  | 6.8748577  | 0.5412386  | -0.4821398 |
| F  | 7.2510427  | -0.9614024 | -1.9835498 |
| S  | 4.7228557  | -0.3954964 | -1.6328538 |
| O  | 4.3821047  | -1.7142274 | -2.1889118 |
| O  | 4.9009887  | 0.6758216  | -2.6330428 |
| O  | 3.9572297  | -0.0224254 | -0.4270068 |
| C  | -8.2705053 | 0.0705966  | 0.9296972  |

|   |            |            |            |
|---|------------|------------|------------|
| H | -7.4034783 | -0.2030784 | 1.5350102  |
| H | -8.7616393 | 0.9381346  | 1.3790172  |
| H | -8.9687003 | -0.7706644 | 0.8996272  |
| C | -5.4322883 | 0.7654226  | -3.0492458 |
| H | -5.4218893 | 1.7368866  | -3.5495928 |
| H | -4.5007253 | 0.6450456  | -2.4871098 |
| H | -5.5102503 | -0.0297814 | -3.7956418 |
| C | 3.9431467  | 4.0515496  | 3.3089762  |
| C | 2.9991267  | 4.9317116  | 2.7517582  |
| C | 1.8967937  | 4.4599656  | 2.0582892  |
| C | 1.7588827  | 3.0774506  | 1.9386992  |
| C | 2.7016647  | 2.1748636  | 2.4807642  |
| C | 3.8057407  | 2.6809986  | 3.1784352  |
| N | 0.7721207  | 2.3340226  | 1.3312252  |
| C | 1.1037437  | 0.9897476  | 1.4215172  |
| C | 2.2572137  | 0.8576916  | 2.1462932  |
| C | 0.1134837  | -0.0363044 | 0.9824832  |
| N | -0.5423493 | 0.3132056  | -0.3057188 |
| C | -1.8696903 | 0.1547896  | -0.5210588 |
| C | 0.2669087  | 0.6990986  | -1.4211258 |
| O | -2.4614503 | 0.4375486  | -1.5569258 |
| C | -2.6284463 | -0.4522324 | 0.5854492  |
| C | -3.1525473 | -1.2043534 | 1.4115062  |
| C | 0.3177987  | 2.0266716  | -1.8339118 |
| C | 1.2103677  | 2.4719206  | -2.7833658 |
| C | 2.0908277  | 1.5454576  | -3.3514588 |
| C | 1.9552237  | 0.1834376  | -3.0564278 |

|   |            |            |            |
|---|------------|------------|------------|
| C | 1.0699907  | -0.2280484 | -2.0795018 |
| O | 3.0666807  | 1.9873396  | -4.1546008 |
| H | -0.6997553 | -0.0396774 | 1.7226582  |
| C | 0.5420307  | -1.5192674 | 0.9676642  |
| O | -0.3611273 | -2.3384164 | 1.1609972  |
| N | 1.8285857  | -1.8192844 | 0.7499442  |
| C | 2.3619967  | -3.2062324 | 0.8001792  |
| C | 1.8904717  | -3.9724684 | -0.4316598 |
| C | 3.8802877  | -3.1005644 | 0.7897152  |
| C | 1.9239887  | -3.8940834 | 2.0907852  |
| C | -3.3668433 | -2.1572184 | 2.4887772  |
| H | 4.7988847  | 4.4589256  | 3.8424302  |
| H | 3.1388937  | 6.0045746  | 2.8648032  |
| H | 1.1674487  | 5.1399746  | 1.6229262  |
| H | 4.5470517  | 2.0043496  | 3.5978552  |
| H | 0.0905987  | 2.7087506  | 0.6856362  |
| H | 2.7438937  | -0.0714984 | 2.4126512  |
| H | 1.2885007  | 3.5274566  | -3.0229708 |
| H | 2.6167647  | -0.5367304 | -3.5288278 |
| H | 3.8657397  | 1.4689886  | -3.9101128 |
| H | 2.4790377  | -1.0923174 | 0.4215342  |
| H | 2.2788197  | -3.4912124 | -1.3385048 |
| H | 2.2753957  | -4.9998524 | -0.4049398 |
| H | 0.7961147  | -4.0126084 | -0.4722048 |
| H | 4.3115507  | -4.0958974 | 0.9493442  |
| H | 4.2386367  | -2.4389624 | 1.5894952  |
| H | 4.2433717  | -2.7216394 | -0.1690588 |

|   |            |            |            |
|---|------------|------------|------------|
| H | 2.4103987  | -4.8751074 | 2.1519402  |
| H | 0.8420277  | -4.0330454 | 2.1364772  |
| H | 2.2433557  | -3.3044724 | 2.9602382  |
| H | -2.3940963 | -2.6398634 | 2.6527772  |
| H | -4.1083123 | -2.9157884 | 2.2232632  |
| H | -3.6868783 | -1.6564534 | 3.4079082  |
| H | 1.0228467  | -1.2771974 | -1.7928248 |
| F | -0.4988563 | 2.9196136  | -1.2309948 |

Zero-point correction= 0.598761 (Hartree/Particle)

Thermal correction to Energy= 0.647084

Thermal correction to Enthalpy= 0.648028

Thermal correction to Gibbs Free Energy= 0.509779

Sum of electronic and zero-point Energies= -2818.537871

Sum of electronic and thermal Energies= -2818.489547

Sum of electronic and thermal Enthalpies= -2818.488603

Sum of electronic and thermal Free Energies= -2818.626852

### **F-ts1**

|   |            |            |            |
|---|------------|------------|------------|
| H | 1.1956579  | -4.6022855 | -0.4310883 |
| H | 2.9000969  | -4.8227025 | -0.9040773 |
| H | 2.4458579  | -4.8826155 | 0.8107147  |
| H | 0.4255959  | 5.3004265  | 0.5560357  |
| H | -0.0516751 | 3.6420975  | 0.8861217  |
| H | 1.4287879  | 3.9718705  | -0.0654433 |
| H | -2.4839171 | 4.6108185  | -1.7711743 |
| H | -2.3110621 | 3.7034865  | -0.2585303 |
| H | -2.0414561 | 5.4626795  | -0.2769683 |
| H | -0.4657451 | 5.5402715  | -2.9653723 |

|   |            |            |            |
|---|------------|------------|------------|
| H | 1.1510669  | 5.3672825  | -2.2410273 |
| H | -0.0626281 | 6.4348015  | -1.4936153 |
| H | -0.3604231 | 3.2888755  | -2.9865543 |
| H | -3.7509771 | -4.3037155 | -1.5196033 |
| H | -1.5571091 | -1.2888125 | 1.0726687  |
| H | -3.0973061 | -3.0748575 | 0.3153757  |
| H | 0.6019929  | 1.8115515  | 0.2039837  |
| H | -2.9118081 | 0.6379225  | -1.2134553 |
| H | -0.8030151 | 1.8001825  | 2.2600037  |
| H | -5.5468501 | 0.3632875  | 0.1653927  |
| H | -2.9110871 | 1.9213235  | 4.1490877  |
| H | -5.3474731 | 1.4655875  | 4.3258967  |
| H | -6.6364781 | 0.6731135  | 2.3716417  |
| C | 2.2348369  | -4.3971055 | -0.1468403 |
| C | 0.3969639  | 4.2916745  | 0.1276377  |
| C | -1.9022741 | 4.5338695  | -0.8447993 |
| C | 0.0839659  | 5.4832875  | -2.0167883 |
| C | -0.4221521 | 4.3243125  | -1.1590713 |
| N | -0.2248261 | 3.1202875  | -1.9946503 |
| O | -0.2317701 | 1.0032615  | -2.7428053 |
| C | -0.2044201 | 1.7665145  | -1.7948703 |
| O | -2.9052381 | -4.2779635 | -2.0521623 |
| C | -1.4147581 | -1.7532885 | 0.0992127  |
| C | -2.2647321 | -2.7605155 | -0.3074173 |
| C | -2.1017631 | -3.3407415 | -1.5808293 |
| C | -1.0192551 | -2.9452965 | -2.3836923 |
| C | -0.2025461 | -1.9190775 | -1.9638663 |



|    |            |            |            |
|----|------------|------------|------------|
| C  | -0.3879931 | -1.2858725 | -0.7298643 |
| C  | 2.3969589  | -2.9474915 | -0.0553983 |
| C  | 2.0900209  | -1.7507265 | -0.0924553 |
| O  | 2.5683229  | 0.5517255  | 0.0476667  |
| C  | 1.7241719  | -0.3243685 | -0.1359343 |
| N  | 0.4094029  | -0.1559445 | -0.3601263 |
| C  | -0.1307661 | 1.2276405  | -0.3624163 |
| C  | -2.6973971 | 0.9617155  | -0.2007263 |
| C  | -1.4629961 | 1.2847465  | 0.2936197  |
| N  | -1.5707121 | 1.5664795  | 1.6503167  |
| C  | -4.9887111 | 0.7495685  | 1.0154807  |
| C  | -3.6206861 | 1.0303725  | 0.8892897  |
| C  | -2.8876521 | 1.4274825  | 2.0338567  |
| C  | -3.4872071 | 1.6062365  | 3.2811677  |
| C  | -4.8447581 | 1.3478245  | 3.3682327  |
| C  | -5.5832671 | 0.9130585  | 2.2531207  |
| Au | 4.3835279  | -1.9186965 | 0.2742487  |
| C  | 8.4991789  | -1.0917265 | 0.9543137  |
| C  | 8.0615229  | 0.1357285  | 0.5859017  |
| H  | 9.4795309  | -1.4428065 | 1.2423627  |
| H  | 8.5834459  | 1.0762655  | 0.4838597  |
| C  | 6.3002819  | -1.2507295 | 0.5329507  |
| N  | 6.7090529  | 0.0201175  | 0.3325177  |
| N  | 7.4019459  | -1.9311775 | 0.9164767  |
| C  | -6.3774271 | -2.5762505 | 0.9681007  |
| F  | -7.1387361 | -1.4813345 | 1.0477367  |
| F  | -5.2916221 | -2.3805525 | 1.7201517  |

|   |            |            |            |
|---|------------|------------|------------|
| F | -7.0605171 | -3.5915705 | 1.4826177  |
| S | -5.9119351 | -2.8962845 | -0.7763623 |
| O | -7.1897571 | -3.0782575 | -1.4535493 |
| O | -5.0972511 | -4.1364945 | -0.6163333 |
| O | -5.1176241 | -1.7145825 | -1.1376353 |
| C | 5.8677369  | 1.1217665  | -0.1254993 |
| H | 4.8109699  | 0.8569425  | -0.0149233 |
| H | 6.0794279  | 2.0072665  | 0.4790707  |
| H | 6.0783269  | 1.3381985  | -1.1765953 |
| C | 7.4489569  | -3.3448985 | 1.2486507  |
| H | 6.4400689  | -3.7563665 | 1.1719217  |
| H | 8.1065659  | -3.8740145 | 0.5533067  |
| H | 7.8133099  | -3.4780635 | 2.2710067  |
| H | -0.8680461 | -3.4030365 | -3.3564093 |
| F | 0.8302569  | -1.5616965 | -2.7327893 |

Zero-point correction= 0.598506 (Hartree/Particle)

Thermal correction to Energy= 0.647043

Thermal correction to Enthalpy= 0.647987

Thermal correction to Gibbs Free Energy= 0.508972

Sum of electronic and zero-point Energies= -2818.518114

Sum of electronic and thermal Energies= -2818.469577

Sum of electronic and thermal Enthalpies= -2818.468633

Sum of electronic and thermal Free Energies= -2818.607648

### **F-int1**

|   |           |            |            |
|---|-----------|------------|------------|
| H | 0.7493333 | -3.4512205 | -1.9579458 |
| H | 1.5684493 | -2.7004555 | -3.3289228 |
| H | 2.5213213 | -3.2715595 | -1.9436668 |

|   |            |            |            |
|---|------------|------------|------------|
| H | -0.7176567 | 5.4722335  | 1.0559552  |
| H | -0.5892757 | 3.7187665  | 1.1101212  |
| H | 0.3085043  | 4.6486195  | -0.1292318 |
| H | -3.9914887 | 4.2990225  | -0.3609218 |
| H | -3.0837637 | 3.3368545  | 0.8242202  |
| H | -3.2483927 | 5.0960145  | 1.0409352  |
| H | -2.7812597 | 5.8685365  | -1.9348478 |
| H | -1.0144247 | 6.0479695  | -1.8217868 |
| H | -2.0686277 | 6.6803905  | -0.5339748 |
| H | -2.3292827 | 3.6797115  | -2.3560278 |
| H | -4.0041987 | -3.0126725 | -2.3752738 |
| H | -0.5829327 | -1.4372085 | 0.2700492  |
| H | -2.5583157 | -2.6184155 | -0.6187978 |
| H | -1.5496087 | -1.2895885 | -4.6394798 |
| H | 0.3416683  | 2.4197965  | -0.2188938 |
| H | -3.1999337 | 0.7586825  | -0.2089338 |
| H | 0.4167283  | 1.0839475  | 1.9429942  |
| H | -4.7100077 | -0.5846775 | 1.9590342  |
| H | -0.3747577 | -0.1061645 | 4.4443422  |
| H | -2.3274447 | -1.2247095 | 5.4936452  |
| H | -4.4615697 | -1.4764105 | 4.2685932  |
| C | 1.5819723  | -2.7908375 | -2.2338708 |
| C | -0.6320207 | 4.5762995  | 0.4302482  |
| C | -3.1157317 | 4.2980585  | 0.2996452  |
| C | -1.9271257 | 5.8586785  | -1.2449808 |
| C | -1.8361207 | 4.5273355  | -0.5010928 |
| N | -1.7204197 | 3.4996765  | -1.5629308 |

|    |            |            |            |
|----|------------|------------|------------|
| O  | -1.4958367 | 1.5657585  | -2.6689198 |
| C  | -1.2319607 | 2.2349015  | -1.6769198 |
| O  | -3.2328767 | -2.5633785 | -3.1681428 |
| C  | -0.8288597 | -1.4090705 | -0.7907518 |
| C  | -1.8854227 | -2.0762335 | -1.2761768 |
| C  | -2.2009237 | -2.0135545 | -2.6924188 |
| C  | -1.3110607 | -1.3250425 | -3.5818318 |
| C  | -0.2873157 | -0.6143285 | -3.0735468 |
| C  | 0.1461663  | -0.6652465 | -1.6487548 |
| C  | 1.4779773  | -1.4610335 | -1.5811908 |
| C  | 2.4032543  | -0.7790105 | -0.8877628 |
| O  | 2.2223033  | 1.3183775  | 0.3342472  |
| C  | 1.7853913  | 0.4921645  | -0.4592778 |
| N  | 0.5406513  | 0.6134065  | -1.0773798 |
| C  | -0.3579187 | 1.6569535  | -0.5784688 |
| C  | -2.4857937 | 0.7418535  | 0.6077302  |
| C  | -1.1865777 | 1.1703595  | 0.5637382  |
| N  | -0.5651467 | 0.9043905  | 1.7726722  |
| C  | -3.7784987 | -0.4711425 | 2.5079322  |
| C  | -2.6881667 | 0.1636785  | 1.8998492  |
| C  | -1.4657957 | 0.2778585  | 2.6076732  |
| C  | -1.3164167 | -0.2051625 | 3.9085152  |
| C  | -2.4124577 | -0.8275075 | 4.4844422  |
| C  | -3.6283307 | -0.9657845 | 3.7907802  |
| Au | 4.3296403  | -1.1810005 | -0.3150628 |
| C  | 8.2188803  | -1.0144625 | 1.4527892  |
| C  | 8.3542673  | -2.2014735 | 0.8166372  |

|   |            |            |            |
|---|------------|------------|------------|
| H | 8.9054473  | -0.4581965 | 2.0748142  |
| H | 9.1824163  | -2.8940085 | 0.7695952  |
| C | 6.2805353  | -1.4279355 | 0.3733662  |
| N | 7.1586413  | -2.4365315 | 0.1624452  |
| N | 6.9451633  | -0.5569075 | 1.1704112  |
| C | -5.3167617 | -3.3814815 | 0.9048392  |
| F | -5.9429217 | -2.6997095 | 1.8579062  |
| F | -4.0233287 | -3.4465025 | 1.2081872  |
| F | -5.8095517 | -4.6069785 | 0.8588932  |
| S | -5.5540287 | -2.5266275 | -0.7026378 |
| O | -6.9838617 | -2.5428205 | -0.9337198 |
| O | -4.7818537 | -3.4921745 | -1.6012698 |
| O | -4.8573037 | -1.2500405 | -0.5668738 |
| C | 6.8860093  | -3.6133465 | -0.6417008 |
| H | 5.8713063  | -3.5295645 | -1.0383268 |
| H | 7.5941703  | -3.6769255 | -1.4732478 |
| H | 6.9606403  | -4.5171425 | -0.0296128 |
| C | 6.4010753  | 0.6972585  | 1.6662782  |
| H | 6.9999673  | 1.5371585  | 1.3020352  |
| H | 5.3743093  | 0.8051955  | 1.3045312  |
| H | 6.3989073  | 0.6985625  | 2.7602502  |
| F | 0.5282303  | 0.0457775  | -3.8647658 |

Zero-point correction= 0.598814 (Hartree/Particle)

Thermal correction to Energy= 0.645371

Thermal correction to Enthalpy= 0.646315

Thermal correction to Gibbs Free Energy= 0.513484

Sum of electronic and zero-point Energies= -2818.576718

Sum of electronic and thermal Energies= -2818.530162

Sum of electronic and thermal Enthalpies= -2818.529217

Sum of electronic and thermal Free Energies= -2818.662049

**F-ts2**

|   |            |            |            |
|---|------------|------------|------------|
| H | -0.5787549 | -2.4011903 | -2.0855615 |
| H | 0.0900601  | -1.3435793 | -3.3219145 |
| H | 1.1711191  | -2.4300803 | -2.4189255 |
| H | 3.2878111  | 3.9612387  | -1.3722995 |
| H | 2.0426191  | 2.7002587  | -1.2313415 |
| H | 1.8659981  | 3.9801717  | -2.4422625 |
| H | 1.3684241  | 4.8794917  | 1.7470785  |
| H | 2.1519681  | 3.3469097  | 1.2388055  |
| H | 3.0058851  | 4.8717557  | 1.0714185  |
| H | 1.1594501  | 6.7576117  | -0.0441715 |
| H | 1.2730861  | 6.3282037  | -1.7698695 |
| H | 2.7323441  | 6.3569087  | -0.7696955 |
| H | -0.4595979 | 5.0505507  | -1.1502555 |
| H | -4.4381909 | -1.4905253 | -2.8355695 |
| H | -1.3378739 | -0.9642093 | 0.5247545  |
| H | -3.3782229 | -1.6531993 | -0.7378235 |
| H | -2.3334149 | 1.1449377  | -3.8616555 |
| H | 0.3939451  | 2.5813397  | 1.3888495  |
| H | -3.1951869 | 1.4846127  | 0.0837205  |
| H | -0.3571699 | 1.1295027  | 3.1215265  |
| H | -5.0864959 | -0.6112923 | 1.2109815  |
| H | -1.7482749 | -0.5217903 | 4.9702245  |
| H | -3.8275589 | -1.8860593 | 5.1379355  |

|   |            |            |            |
|---|------------|------------|------------|
| H | -5.4611329 | -1.9313143 | 3.2835515  |
| C | 0.2919531  | -1.7828803 | -2.3364665 |
| C | 2.2096691  | 3.7648827  | -1.4235255 |
| C | 2.0155841  | 4.4069127  | 0.9976295  |
| C | 1.6656751  | 6.1081917  | -0.7683225 |
| C | 1.4716471  | 4.6359197  | -0.4107845 |
| N | 0.0070221  | 4.4195627  | -0.5057635 |
| O | -2.0078829 | 3.4340537  | -0.6041285 |
| C | -0.8557369 | 3.4152187  | -0.1951185 |
| O | -3.8314219 | -0.7782783 | -3.2289545 |
| C | -1.6960969 | -0.3346423 | -0.2966325 |
| C | -2.6962309 | -0.9049693 | -1.1326675 |
| C | -2.9140149 | -0.3785563 | -2.3943155 |
| C | -2.0659089 | 0.6820847  | -2.9173215 |
| C | -0.9668419 | 1.0341757  | -2.2491075 |
| C | -0.5141869 | 0.3537847  | -0.9965385 |
| C | 0.5425881  | -0.7404273 | -1.3088635 |
| C | 1.6240241  | -0.6085843 | -0.5159445 |
| O | 2.0437971  | 0.9733027  | 1.3005335  |
| C | 1.4027401  | 0.5698407  | 0.3399555  |
| N | 0.2542131  | 1.2207667  | -0.1256665 |
| C | -0.3752809 | 2.2563317  | 0.6808425  |
| C | -2.6194959 | 0.9622797  | 0.8404345  |
| C | -1.4651879 | 1.5592817  | 1.4103515  |
| N | -1.2314159 | 1.0224067  | 2.6205385  |
| C | -4.3627279 | -0.5963093 | 2.0254845  |
| C | -3.1972599 | 0.1573577  | 1.9195745  |

|    |            |            |            |
|----|------------|------------|------------|
| C  | -2.2817929 | 0.1693617  | 2.9855255  |
| C  | -2.4710289 | -0.5480063 | 4.1582955  |
| C  | -3.6353239 | -1.3028223 | 4.2406845  |
| C  | -4.5639509 | -1.3245393 | 3.1933805  |
| Au | 3.3210821  | -1.7415973 | -0.3114125 |
| C  | 7.0612231  | -3.5018123 | 0.8095385  |
| C  | 6.7114541  | -4.3807453 | -0.1585245 |
| H  | 7.9309431  | -3.4564003 | 1.4492185  |
| H  | 7.2125451  | -5.2601223 | -0.5370125 |
| C  | 5.0698581  | -2.8375563 | -0.0201095 |
| N  | 5.4913521  | -3.9574883 | -0.6535765 |
| N  | 6.0456471  | -2.5662933 | 0.8795365  |
| C  | -6.0683679 | -3.2282743 | 0.1589245  |
| F  | -6.7818439 | -2.8366443 | 1.2164405  |
| F  | -4.7797589 | -3.2365403 | 0.5216085  |
| F  | -6.4186839 | -4.4661713 | -0.1529405 |
| S  | -6.3399329 | -2.0791823 | -1.2473295 |
| O  | -7.7388379 | -2.2693293 | -1.5952225 |
| O  | -5.3503099 | -2.6033393 | -2.2360395 |
| O  | -5.9413179 | -0.7732593 | -0.7022095 |
| C  | 4.7623091  | -4.6344653 | -1.7109655 |
| H  | 3.8384341  | -4.0822583 | -1.9001645 |
| H  | 5.3603901  | -4.6610253 | -2.6266175 |
| H  | 4.5149471  | -5.6558623 | -1.4070175 |
| C  | 6.0348761  | -1.4429443 | 1.8013295  |
| H  | 6.8915691  | -0.7898263 | 1.6103695  |
| H  | 5.1108191  | -0.8772193 | 1.6532075  |



|   |            |            |            |
|---|------------|------------|------------|
| H | 6.0743631  | -1.8031473 | 2.8335675  |
| F | -0.1307199 | 1.9555457  | -2.7152065 |

Zero-point correction= 0.602614 (Hartree/Particle)

Thermal correction to Energy= 0.648037

Thermal correction to Enthalpy= 0.648981

Thermal correction to Gibbs Free Energy= 0.519930

Sum of electronic and zero-point Energies= -2818.545513

Sum of electronic and thermal Energies= -2818.500090

Sum of electronic and thermal Enthalpies= -2818.499146

Sum of electronic and thermal Free Energies= -2818.628197

### **F-int2**

|   |            |            |            |
|---|------------|------------|------------|
| H | -0.5856978 | -2.4637538 | -1.8357205 |
| H | 0.0012822  | -1.4479848 | -3.1411055 |
| H | 1.1479962  | -2.4841388 | -2.2532055 |
| H | 3.5302982  | 3.4852632  | -1.6847115 |
| H | 2.1606092  | 2.3823352  | -1.4238725 |
| H | 2.0791972  | 3.5958782  | -2.7076095 |
| H | 1.8881062  | 4.8766592  | 1.4063645  |
| H | 2.4012282  | 3.1994382  | 1.0263095  |
| H | 3.4700332  | 4.5491602  | 0.6798005  |
| H | 1.7918212  | 6.5905632  | -0.5063645 |
| H | 1.7711852  | 6.0223492  | -2.1963025 |
| H | 3.2710602  | 5.9566102  | -1.2599255 |
| H | -0.0782928 | 5.0666942  | -1.3252505 |
| H | -4.2519908 | -1.6699678 | -2.7882335 |
| H | -1.3399538 | -0.8091948 | 0.6386445  |
| H | -3.2966868 | -1.6696618 | -0.6326605 |

|   |            |            |            |
|---|------------|------------|------------|
| H | -2.2931658 | 1.0723152  | -3.8116165 |
| H | 0.5249592  | 2.6319442  | 1.4135255  |
| H | -2.9311748 | 1.6742532  | -0.2209465 |
| H | -0.9284058 | 1.9443632  | 3.2939735  |
| H | -5.0497518 | -0.4095428 | 0.7033995  |
| H | -2.7979688 | 0.7650082  | 5.0472465  |
| H | -4.9182608 | -0.5531978 | 5.0103295  |
| H | -6.0017768 | -1.1327268 | 2.8632435  |
| C | 0.2636172  | -1.8459758 | -2.1528435 |
| C | 2.4361402  | 3.4073862  | -1.6887135 |
| C | 2.4179292  | 4.2404092  | 0.6858085  |
| C | 2.1845932  | 5.8342302  | -1.1966935 |
| C | 1.8452922  | 4.4242452  | -0.7165305 |
| N | 0.3620392  | 4.3754932  | -0.7262995 |
| O | -1.7876268 | 3.8005892  | -0.4168975 |
| C | -0.6006128 | 3.5728372  | -0.2149495 |
| O | -3.7109588 | -0.9357688 | -3.1959625 |
| C | -1.7116998 | -0.1659798 | -0.1732225 |
| C | -2.6723268 | -0.8813458 | -1.0422015 |
| C | -2.8533988 | -0.4479318 | -2.3176535 |
| C | -2.0252358 | 0.6361752  | -2.8538705 |
| C | -0.9320778 | 1.0269372  | -2.1978865 |
| C | -0.4684338 | 0.3742352  | -0.9264855 |
| C | 0.5414472  | -0.7619638 | -1.1764445 |
| C | 1.6227862  | -0.6475088 | -0.3769405 |
| O | 2.1014712  | 0.9928092  | 1.3704425  |
| C | 1.4495332  | 0.5690742  | 0.4271555  |

|    |            |            |            |
|----|------------|------------|------------|
| N  | 0.3260142  | 1.2504632  | -0.0739755 |
| C  | -0.2294938 | 2.3671762  | 0.6596185  |
| C  | -2.4750318 | 1.0674002  | 0.5678395  |
| C  | -1.4469078 | 1.8089452  | 1.3049285  |
| N  | -1.5929318 | 1.6231892  | 2.5974235  |
| C  | -4.5464208 | -0.1565968 | 1.6386955  |
| C  | -3.3617458 | 0.5627242  | 1.6568395  |
| C  | -2.7658238 | 0.8761862  | 2.8821225  |
| C  | -3.2834508 | 0.5042972  | 4.1101475  |
| C  | -4.4677618 | -0.2287368 | 4.0759045  |
| C  | -5.0837048 | -0.5507808 | 2.8646755  |
| Au | 3.2553532  | -1.8595018 | -0.1094425 |
| C  | 6.8765632  | -3.8113158 | 1.0909385  |
| C  | 6.4734712  | -4.6978918 | 0.1510115  |
| H  | 7.7457882  | -3.8004038 | 1.7328285  |
| H  | 6.9181272  | -5.6196628 | -0.1958135 |
| C  | 4.9334752  | -3.0490288 | 0.2305615  |
| N  | 5.2842172  | -4.2143728 | -0.3633365 |
| N  | 5.9227992  | -2.8110048 | 1.1250685  |
| C  | -5.8225998 | -3.4409168 | 0.3667685  |
| F  | -6.7321308 | -3.1218668 | 1.2898175  |
| F  | -4.6231828 | -3.0843048 | 0.8498785  |
| F  | -5.8263488 | -4.7559958 | 0.2088715  |
| S  | -6.1803148 | -2.5703088 | -1.2111155 |
| O  | -7.4480868 | -3.1398578 | -1.6425575 |
| O  | -4.9916888 | -2.9416828 | -2.0272755 |
| O  | -6.1791948 | -1.1545838 | -0.8122555 |

|   |            |            |            |
|---|------------|------------|------------|
| C | 4.5159682  | -4.8786178 | -1.4011035 |
| H | 3.6281952  | -4.2769058 | -1.6112425 |
| H | 5.1126132  | -4.9716568 | -2.3133595 |
| H | 4.2052672  | -5.8723568 | -1.0653635 |
| C | 5.9808832  | -1.6597518 | 2.0093825  |
| H | 6.8793182  | -1.0703118 | 1.8034355  |
| H | 5.0962552  | -1.0408558 | 1.8357465  |
| H | 5.9914482  | -1.9870378 | 3.0532685  |
| F | -0.1160648 | 1.9653162  | -2.6840585 |

Zero-point correction= 0.602352 (Hartree/Particle)

Thermal correction to Energy= 0.648621

Thermal correction to Enthalpy= 0.649565

Thermal correction to Gibbs Free Energy= 0.516345

Sum of electronic and zero-point Energies= -2818.548726

Sum of electronic and thermal Energies= -2818.502457

Sum of electronic and thermal Enthalpies= -2818.501513

Sum of electronic and thermal Free Energies= -2818.634733

### **F-ts3**

|   |            |            |            |
|---|------------|------------|------------|
| H | 0.3794145  | -3.3776206 | 0.9997133  |
| H | -0.3842985 | -3.0101166 | 2.5407473  |
| H | -1.3642805 | -3.6734416 | 1.2143853  |
| H | -3.0638815 | 4.8552154  | 0.5068033  |
| H | -2.3947015 | 3.2177924  | 0.4796873  |
| H | -2.4867905 | 4.1129354  | 2.0119013  |
| H | 0.3870755  | 5.4441814  | -0.9101817 |
| H | -0.6938725 | 4.0825704  | -1.3420577 |
| H | -1.3385505 | 5.7105324  | -1.2186797 |

|   |            |            |            |
|---|------------|------------|------------|
| H | 0.0933525  | 6.6959584  | 1.2430433  |
| H | -1.0998395 | 6.1411154  | 2.4461203  |
| H | -1.6446765 | 6.8659174  | 0.9249943  |
| H | 0.5626085  | 4.5161994  | 2.2063983  |
| H | 4.6778655  | -1.6977516 | 2.2650443  |
| H | 1.1146725  | -1.6814306 | -0.5324397 |
| H | 3.4947285  | -1.6926606 | 0.3134283  |
| H | 1.8746255  | -0.6736676 | 4.1733883  |
| H | -0.7109315 | 2.3574614  | -0.4278517 |
| H | 2.8151625  | 0.3311714  | 0.3740853  |
| H | 1.5818675  | 3.3443694  | -1.6847637 |
| H | 3.9348375  | -1.5311306 | -1.8426087 |
| H | 3.6322585  | 3.1660484  | -3.6035317 |
| H | 5.3035295  | 1.5527104  | -4.5057797 |
| H | 5.4473025  | -0.7496436 | -3.6044297 |
| C | -0.5435355 | -2.9899766 | 1.4536643  |
| C | -2.2891595 | 4.2088564  | 0.9379053  |
| C | -0.6155055 | 5.0170984  | -0.7734657 |
| C | -0.8851835 | 6.2166534  | 1.3729223  |
| C | -0.9171705 | 4.8394494  | 0.7148543  |
| N | 0.1521115  | 4.0680524  | 1.3931323  |
| O | 1.2738005  | 2.2806614  | 2.1879783  |
| C | 0.5134205  | 2.7580104  | 1.3619753  |
| O | 3.9402355  | -1.4714456 | 2.9065463  |
| C | 1.4230685  | -0.8830906 | 0.1571623  |
| C | 2.7128335  | -1.2096406 | 0.8961583  |
| C | 2.8302335  | -1.1871306 | 2.2691473  |

|    |            |            |            |
|----|------------|------------|------------|
| C  | 1.7306535  | -0.7565566 | 3.1011173  |
| C  | 0.5825565  | -0.3868266 | 2.5296663  |
| C  | 0.2097915  | -0.5313036 | 1.0765783  |
| C  | -0.8646925 | -1.6179056 | 0.9833653  |
| C  | -2.0169805 | -1.1466516 | 0.4736053  |
| O  | -2.5738615 | 1.0840274  | -0.3488127 |
| C  | -1.8151835 | 0.2867704  | 0.1865023  |
| N  | -0.5331265 | 0.6361204  | 0.6164473  |
| C  | 0.0595085  | 1.8745324  | 0.1856503  |
| C  | 1.9461185  | 0.3330354  | -0.5890407 |
| C  | 1.2539745  | 1.5658924  | -0.6410117 |
| N  | 1.8264325  | 2.3722074  | -1.5439067 |
| C  | 3.8342295  | -0.5162876 | -2.2281087 |
| C  | 2.8919165  | 0.3768174  | -1.7263877 |
| C  | 2.8397935  | 1.6864844  | -2.2329807 |
| C  | 3.6858305  | 2.1451494  | -3.2328017 |
| C  | 4.6134425  | 1.2368414  | -3.7276357 |
| C  | 4.6876995  | -0.0691456 | -3.2299767 |
| Au | -3.8169795 | -2.0184676 | 0.0331923  |
| C  | -7.8154905 | -2.8633866 | -1.2384507 |
| C  | -7.4868345 | -4.1037206 | -0.8077057 |
| H  | -8.7272025 | -2.4795936 | -1.6734447 |
| H  | -8.0520425 | -5.0245306 | -0.7899357 |
| C  | -5.6941435 | -2.7729006 | -0.4713467 |
| N  | -6.1865705 | -4.0277436 | -0.3424987 |
| N  | -6.7076245 | -2.0641546 | -1.0250197 |
| C  | 7.0853335  | -3.9612626 | 0.3048503  |

|   |            |            |            |
|---|------------|------------|------------|
| F | 7.2849495  | -4.7206706 | -0.7666577 |
| F | 6.5088585  | -4.7023626 | 1.2467203  |
| F | 8.2621055  | -3.5442256 | 0.7559803  |
| S | 6.0187785  | -2.5338946 | -0.1219337 |
| O | 6.7622955  | -1.8064156 | -1.1471207 |
| O | 5.8970325  | -1.8246726 | 1.1794383  |
| O | 4.7615565  | -3.1657606 | -0.5630627 |
| C | -5.4496185 | -5.1503276 | 0.2080733  |
| H | -4.4554335 | -4.7995206 | 0.4956553  |
| H | -5.9622295 | -5.5445556 | 1.0905863  |
| H | -5.3498065 | -5.9425976 | -0.5398577 |
| C | -6.6467695 | -0.6495186 | -1.3536357 |
| H | -5.6538085 | -0.2705026 | -1.0945697 |
| H | -6.8187585 | -0.5048306 | -2.4243377 |
| H | -7.4017835 | -0.0979876 | -0.7854537 |
| F | -0.4265405 | 0.0461914  | 3.2728703  |

Zero-point correction= 0.597316 (Hartree/Particle)

Thermal correction to Energy= 0.643588

Thermal correction to Enthalpy= 0.644533

Thermal correction to Gibbs Free Energy= 0.510586

Sum of electronic and zero-point Energies= -2818.508951

Sum of electronic and thermal Energies= -2818.462679

Sum of electronic and thermal Enthalpies= -2818.461735

Sum of electronic and thermal Free Energies= -2818.595681

### **F-int3**

|   |           |            |            |
|---|-----------|------------|------------|
| H | 0.1720696 | -3.6339824 | -0.0346794 |
| H | 0.1753676 | -3.3536644 | 1.7118236  |

|   |            |            |            |
|---|------------|------------|------------|
| H | -1.3302714 | -3.8097784 | 0.8825886  |
| H | -3.1713074 | 4.8683526  | 0.0667436  |
| H | -2.5342984 | 3.2161536  | 0.2014346  |
| H | -2.7897924 | 4.1886466  | 1.6611946  |
| H | 0.3858076  | 5.4320226  | -0.9745394 |
| H | -0.5656664 | 4.0097826  | -1.4632144 |
| H | -1.3052624 | 5.6087596  | -1.4662784 |
| H | -0.0572174 | 6.6535106  | 1.1379836  |
| H | -1.4077544 | 6.1710056  | 2.1971176  |
| H | -1.7366884 | 6.8749416  | 0.6055466  |
| H | 0.1158956  | 4.4482226  | 2.2381746  |
| H | 5.4543556  | -1.7982554 | 0.8852696  |
| H | 0.9932016  | -1.2562394 | -1.2787464 |
| H | 2.1145926  | -2.7685464 | 0.2880836  |
| H | 2.3848896  | -0.7753694 | 3.4848766  |
| H | -0.7234734 | 2.2872736  | -0.5470714 |
| H | 1.9033636  | 3.7456546  | -0.5019534 |
| H | 4.4462446  | -0.8506984 | -1.7876024 |
| H | 4.4364196  | 4.1554136  | -1.6412874 |
| H | 6.4256636  | 2.8920496  | -2.4434434 |
| H | 6.3970896  | 0.4162896  | -2.5066224 |
| C | -0.4150724 | -3.2150294 | 0.7952316  |
| C | -2.4659684 | 4.2301016  | 0.6140066  |
| C | -0.6052984 | 4.9618866  | -0.9242014 |
| C | -1.0613774 | 6.2114586  | 1.1565136  |
| C | -1.0615204 | 4.8208386  | 0.5263996  |
| N | -0.0931064 | 4.0325906  | 1.3348456  |



|    |            |            |            |
|----|------------|------------|------------|
| O  | 0.5623486  | 2.1818986  | 2.4493136  |
| C  | 0.1161826  | 2.6770896  | 1.4304226  |
| O  | 4.2608596  | -1.3941404 | 1.7619476  |
| C  | 1.4354106  | -0.8107414 | -0.3732504 |
| C  | 2.5219786  | -1.7585104 | 0.1418336  |
| C  | 3.0633026  | -1.3167784 | 1.4712446  |
| C  | 2.0855096  | -0.8885534 | 2.4474266  |
| C  | 0.8198116  | -0.6438584 | 2.0692146  |
| C  | 0.2832916  | -0.6769784 | 0.6603796  |
| C  | -0.7689444 | -1.7879364 | 0.5615926  |
| C  | -1.9845684 | -1.2924054 | 0.2709536  |
| O  | -2.6927014 | 0.9934796  | -0.1968054 |
| C  | -1.8449914 | 0.1727306  | 0.1303246  |
| N  | -0.5285734 | 0.5036256  | 0.4088286  |
| C  | -0.0188464 | 1.8270326  | 0.1584416  |
| C  | 2.0111196  | 0.5432926  | -0.6881364 |
| C  | 1.3439906  | 1.7072916  | -0.4319634 |
| N  | 2.1212756  | 2.7934626  | -0.7571004 |
| C  | 4.4209406  | 0.2337106  | -1.7170144 |
| C  | 3.2974706  | 0.9212826  | -1.2283634 |
| C  | 3.3340456  | 2.3387556  | -1.2294754 |
| C  | 4.4406476  | 3.0674086  | -1.6592124 |
| C  | 5.5412046  | 2.3563166  | -2.1069494 |
| C  | 5.5254336  | 0.9536776  | -2.1401114 |
| Au | -3.8362104 | -2.1101224 | -0.0378114 |
| C  | -7.9851014 | -2.6142434 | -0.9323424 |
| C  | -7.6956574 | -3.9131734 | -0.6848584 |

|   |            |            |            |
|---|------------|------------|------------|
| H | -8.9102694 | -2.1330444 | -1.2156994 |
| H | -8.3154434 | -4.7980674 | -0.7077994 |
| C | -5.7936124 | -2.7292024 | -0.4032644 |
| N | -6.3511544 | -3.9624144 | -0.3632014 |
| N | -6.8109814 | -1.9061184 | -0.7552554 |
| C | 5.7287546  | -4.6385784 | 0.6092546  |
| F | 5.5337906  | -5.7424314 | -0.0900124 |
| F | 4.5988686  | -4.3006554 | 1.2220076  |
| F | 6.6702746  | -4.8429134 | 1.5092416  |
| S | 6.2117576  | -3.2840124 | -0.5338244 |
| O | 7.5183866  | -3.6020584 | -1.0517684 |
| O | 6.3446496  | -2.1007044 | 0.4742816  |
| O | 5.0645826  | -3.1148864 | -1.4093324 |
| C | -5.6349144 | -5.1785844 | -0.0276564 |
| H | -4.5943354 | -4.9161494 | 0.1780736  |
| H | -6.0720574 | -5.6444334 | 0.8606936  |
| H | -5.6707484 | -5.8837114 | -0.8635774 |
| C | -6.6925674 | -0.4665014 | -0.9267364 |
| H | -7.3551124 | 0.0504136  | -0.2262164 |
| H | -5.6582934 | -0.1687884 | -0.7289424 |
| H | -6.9566394 | -0.1880184 | -1.9512484 |
| H | 3.3374896  | -1.8658974 | -0.5742804 |
| F | -0.1025374 | -0.4102434 | 2.9785376  |

Zero-point correction= 0.602632 (Hartree/Particle)

Thermal correction to Energy= 0.648923

Thermal correction to Enthalpy= 0.649868

Thermal correction to Gibbs Free Energy= 0.516793

Sum of electronic and zero-point Energies= -2818.594824

Sum of electronic and thermal Energies= -2818.548533

Sum of electronic and thermal Enthalpies= -2818.547589

Sum of electronic and thermal Free Energies= -2818.680664

**F-int4**

|   |            |            |            |
|---|------------|------------|------------|
| H | 0.9274740  | -0.1958417 | -3.4017602 |
| H | 1.0581350  | 1.4175243  | -2.6899302 |
| H | 2.4509360  | 0.3148073  | -2.6572532 |
| H | -4.1962070 | 3.0246703  | 4.3005258  |
| H | -4.7099320 | 1.3866693  | 3.8395108  |
| H | -3.0576620 | 1.6624943  | 4.4461958  |
| H | -4.2203530 | 3.0541363  | 0.5307028  |
| H | -5.3837080 | 2.1994103  | 1.5722998  |
| H | -4.8722080 | 3.8496603  | 1.9764138  |
| H | -1.8818230 | 3.5398473  | 1.3947098  |
| H | -1.3709950 | 2.9209283  | 2.9779258  |
| H | -2.5274980 | 4.2727103  | 2.8804238  |
| H | -3.4084410 | 0.8385883  | 0.9002258  |
| H | -1.0294600 | -1.5838187 | -2.2160092 |
| H | -1.1864300 | 0.4235823  | -3.5468252 |
| H | -1.9121690 | 3.1894163  | -1.0526202 |
| H | -1.3614550 | -1.7400067 | 2.0102318  |
| H | -4.1912790 | -2.0806987 | 1.7859478  |
| H | -3.9717850 | -1.9105087 | -3.6048972 |
| H | -6.4946090 | -3.1096407 | 0.5529908  |
| H | -7.4524430 | -3.5479937 | -1.6996782 |
| H | -6.1888410 | -2.9592947 | -3.7410532 |

|   |            |            |            |
|---|------------|------------|------------|
| C | 1.3615890  | 0.3680583  | -2.5639192 |
| C | -3.8643840 | 2.0856163  | 3.8406738  |
| C | -4.5308270 | 2.8903313  | 1.5719578  |
| C | -2.2171990 | 3.3280953  | 2.4169348  |
| C | -3.3852360 | 2.3454813  | 2.4155908  |
| N | -2.9832320 | 1.0699233  | 1.7903198  |
| O | -1.3012460 | 0.4728213  | 3.2205978  |
| C | -1.9677550 | 0.2790273  | 2.2191708  |
| O | -3.5014770 | 2.0946193  | -2.8560732 |
| C | -1.5614470 | -0.7382457 | -1.7492022 |
| C | -2.0245260 | 0.2039373  | -2.8699782 |
| C | -2.5387110 | 1.5339513  | -2.3677172 |
| C | -1.7448850 | 2.1424563  | -1.2948322 |
| C | -0.8492880 | 1.4170333  | -0.6183502 |
| C | -0.5378950 | -0.0463897 | -0.7992152 |
| C | 0.9191060  | -0.1842637 | -1.2548362 |
| C | 1.6655020  | -0.8164567 | -0.3261022 |
| O | 1.0203080  | -1.8616757 | 1.7844548  |
| C | 0.7641100  | -1.1983967 | 0.7964528  |
| N | -0.4897260 | -0.6893777 | 0.5004898  |
| C | -1.6566900 | -0.9397177 | 1.3136878  |
| C | -2.7254320 | -1.2811207 | -0.9650392 |
| C | -2.7486310 | -1.3638437 | 0.4013278  |
| N | -3.9357030 | -1.9168657 | 0.8245918  |
| C | -4.5132470 | -2.1423227 | -2.6904752 |
| C | -3.9595160 | -1.8628847 | -1.4319432 |
| C | -4.6950830 | -2.2388197 | -0.2795222 |

|    |            |            |            |
|----|------------|------------|------------|
| C  | -5.9512100 | -2.8370157 | -0.3492912 |
| C  | -6.4749210 | -3.0807617 | -1.6079022 |
| C  | -5.7582610 | -2.7427597 | -2.7664252 |
| Au | 3.6315700  | -1.4097747 | -0.1524182 |
| C  | 7.2703310  | -3.0336077 | 1.3625948  |
| C  | 7.7982010  | -2.3107837 | 0.3463768  |
| H  | 7.7380420  | -3.6526487 | 2.1146308  |
| H  | 8.8221690  | -2.1618847 | 0.0352878  |
| C  | 5.5634280  | -2.0454067 | 0.2721298  |
| N  | 6.7376820  | -1.7175847 | -0.3113602 |
| N  | 5.9011090  | -2.8576567 | 1.3021218  |
| C  | 4.4490560  | 3.8802133  | -0.7857742 |
| F  | 3.4705450  | 4.2716023  | -1.5773702 |
| F  | 5.6122180  | 4.2351813  | -1.3056772 |
| F  | 4.3103420  | 4.4177373  | 0.4081118  |
| S  | 4.4570850  | 2.0454723  | -0.6556752 |
| O  | 3.0047630  | 1.9361543  | -0.0363872 |
| O  | 5.4876750  | 1.6878883  | 0.2967718  |
| O  | 4.4972080  | 1.5171253  | -2.0070502 |
| C  | 6.8797190  | -0.7908167 | -1.4224312 |
| H  | 5.9121000  | -0.6776967 | -1.9163912 |
| H  | 7.1934390  | 0.1916243  | -1.0568722 |
| H  | 7.6129480  | -1.1825737 | -2.1328882 |
| C  | 4.9559440  | -3.4720467 | 2.2213228  |
| H  | 5.2761350  | -3.2935357 | 3.2516498  |
| H  | 3.9689670  | -3.0235627 | 2.0734208  |
| H  | 4.8928890  | -4.5494237 | 2.0404308  |

|   |            |            |            |
|---|------------|------------|------------|
| H | -2.8131030 | -0.2503047 | -3.4749282 |
| H | 2.6514290  | 1.0050493  | -0.0862042 |
| F | -0.1152240 | 1.9841833  | 0.3330708  |

Zero-point correction= 0.601816 (Hartree/Particle)

Thermal correction to Energy= 0.648537

Thermal correction to Enthalpy= 0.649481

Thermal correction to Gibbs Free Energy= 0.517064

Sum of electronic and zero-point Energies= -2818.596489

Sum of electronic and thermal Energies= -2818.549768

Sum of electronic and thermal Enthalpies= -2818.548824

Sum of electronic and thermal Free Energies= -2818.681242

#### **F-ts4**

|   |            |            |            |
|---|------------|------------|------------|
| H | -1.2205047 | -0.8537911 | 3.1362716  |
| H | -0.7333977 | 0.8407469  | 3.2681616  |
| H | -2.3505147 | 0.4049349  | 2.6260846  |
| H | 3.8488043  | 4.9840469  | -1.7972974 |
| H | 3.3259693  | 3.9570579  | -0.4410054 |
| H | 4.3578333  | 3.2806229  | -1.7257474 |
| H | 0.2306163  | 4.2471389  | -2.5178594 |
| H | 0.9227853  | 4.5219929  | -0.8988314 |
| H | 1.4109773  | 5.5480889  | -2.2620724 |
| H | 1.6498433  | 3.2780809  | -4.3494254 |
| H | 3.3553173  | 2.8683369  | -4.0506394 |
| H | 2.8470403  | 4.5737649  | -4.1271044 |
| H | 0.9929283  | 2.1933259  | -1.3072874 |
| H | 0.7882583  | -2.0397701 | 1.4338646  |
| H | 0.9034973  | -0.9204511 | 3.6115726  |

|   |            |            |            |
|---|------------|------------|------------|
| H | 2.6553723  | 2.3805039  | 2.8140976  |
| H | 1.5712303  | -0.7299501 | -2.1781394 |
| H | 4.5199463  | -0.7947651 | -1.8407824 |
| H | 3.7726373  | -3.1407801 | 2.9804956  |
| H | 6.7110063  | -2.4338861 | -1.0102644 |
| H | 7.4879483  | -3.7744741 | 0.9389526  |
| H | 6.0107713  | -4.1158401 | 2.8933846  |
| C | -1.2898877 | 0.1283109  | 2.6469016  |
| C | 3.5344873  | 3.9708249  | -1.5187664 |
| C | 1.1422193  | 4.5257159  | -1.9746694 |
| C | 2.5534733  | 3.5684679  | -3.8007114 |
| C | 2.2855383  | 3.5739569  | -2.3002964 |
| N | 1.8395473  | 2.2370829  | -1.8590104 |
| O | 3.6392263  | 0.9905369  | -2.5182424 |
| C | 2.5580923  | 1.1080469  | -1.9450164 |
| O | 3.5297213  | 0.2578429  | 4.1211576  |
| C | 1.4921163  | -1.1958471 | 1.5348186  |
| C | 1.8229653  | -1.0148481 | 3.0183996  |
| C | 2.6521323  | 0.2216529  | 3.2837086  |
| C | 2.2483323  | 1.4165869  | 2.5214206  |
| C | 1.3716723  | 1.3217659  | 1.5210366  |
| C | 0.7543873  | 0.0596179  | 0.9739626  |
| C | -0.7455017 | 0.0491769  | 1.2714506  |
| C | -1.4741447 | 0.0006899  | 0.1263316  |
| O | -0.7567997 | -0.2089101 | -2.1972954 |
| C | -0.5248407 | -0.0515301 | -1.0136354 |
| N | 0.7537413  | 0.0806619  | -0.4860014 |

|    |            |            |            |
|----|------------|------------|------------|
| C  | 1.9217643  | -0.1434441 | -1.3112484 |
| C  | 2.7330503  | -1.4446251 | 0.7227586  |
| C  | 2.9150863  | -0.9260221 | -0.5308264 |
| N  | 4.1382993  | -1.2752561 | -1.0328284 |
| C  | 4.3945193  | -2.9573491 | 2.1080926  |
| C  | 3.9382013  | -2.1781291 | 1.0324216  |
| C  | 4.7995923  | -2.0228791 | -0.0862114 |
| C  | 6.0757663  | -2.5797041 | -0.1394574 |
| C  | 6.4975583  | -3.3256371 | 0.9472696  |
| C  | 5.6594363  | -3.5167661 | 2.0566586  |
| Au | -3.2068977 | -1.2480021 | -0.2070164 |
| C  | -6.0455247 | -3.9613321 | -1.7977454 |
| C  | -6.7831817 | -3.4503791 | -0.7826914 |
| H  | -6.2839657 | -4.6957531 | -2.5533084 |
| H  | -7.8027687 | -3.6390081 | -0.4793304 |
| C  | -4.7612637 | -2.4828421 | -0.6953554 |
| N  | -5.9778907 | -2.5495051 | -0.1153864 |
| N  | -4.8069287 | -3.3531751 | -1.7298514 |
| C  | -5.0518407 | 3.2786129  | 1.5640086  |
| F  | -4.1461847 | 3.6519659  | 2.4552736  |
| F  | -6.2395127 | 3.2230809  | 2.1496606  |
| F  | -5.0897897 | 4.1618519  | 0.5812436  |
| S  | -4.6381397 | 1.6153679  | 0.9072676  |
| O  | -3.2845847 | 1.9027749  | 0.2840656  |
| O  | -5.6834607 | 1.3010819  | -0.0601184 |
| O  | -4.5344967 | 0.7462159  | 2.0849006  |
| C  | -6.4211377 | -1.7036221 | 0.9877806  |



|   |            |            |            |
|---|------------|------------|------------|
| H | -7.1849477 | -2.2393591 | 1.5565186  |
| H | -5.5715307 | -1.4695901 | 1.6332896  |
| H | -6.8137667 | -0.7572811 | 0.6032846  |
| C | -3.7058807 | -3.6266881 | -2.6384474 |
| H | -3.2331867 | -4.5827621 | -2.3937444 |
| H | -4.0792787 | -3.6563241 | -3.6655164 |
| H | -2.9675777 | -2.8245221 | -2.5521344 |
| H | 2.3602883  | -1.8777101 | 3.4157406  |
| H | -2.4860577 | 0.8664009  | 0.1628316  |
| F | 0.9213873  | 2.4255729  | 0.9161756  |

Zero-point correction= 0.597226 (Hartree/Particle)

Thermal correction to Energy= 0.643096

Thermal correction to Enthalpy= 0.644040

Thermal correction to Gibbs Free Energy= 0.512935

Sum of electronic and zero-point Energies= -2818.596637

Sum of electronic and thermal Energies= -2818.550767

Sum of electronic and thermal Enthalpies= -2818.549823

Sum of electronic and thermal Free Energies= -2818.680927

## **F-2**

|   |            |            |            |
|---|------------|------------|------------|
| H | -0.5948559 | 3.9776891  | 2.6269152  |
| H | -2.0663669 | 3.2313921  | 3.3044632  |
| H | -0.5323939 | 3.2185921  | 4.2113282  |
| H | -2.8375959 | -5.5365649 | 0.6251322  |
| H | -3.5101809 | -3.9146929 | 0.3473072  |
| H | -2.1559459 | -4.4966309 | -0.6495478 |
| H | -1.5326609 | -3.4984499 | 3.4982982  |
| H | -3.1372909 | -3.2785209 | 2.7552672  |

|   |            |            |            |
|---|------------|------------|------------|
| H | -2.5129839 | -4.9117499 | 3.0632422  |
| H | 0.4036231  | -4.3006579 | 2.1055082  |
| H | 0.1515031  | -4.7740579 | 0.4057472  |
| H | -0.5176679 | -5.7754219 | 1.7164012  |
| H | -1.4081709 | -1.8307559 | 1.7517832  |
| H | -0.3273129 | 2.6744431  | 0.0256152  |
| H | -2.1252019 | 3.9257381  | 1.1089862  |
| H | -4.7312819 | 1.0860301  | 1.7151242  |
| H | 0.7845201  | -0.6596589 | -0.4281778 |
| H | -1.1267639 | -1.4664099 | -2.6301078 |
| H | -3.1242649 | 3.5693121  | -2.3952038 |
| H | -2.4680419 | -0.6600119 | -4.9927868 |
| H | -3.7276819 | 1.2610031  | -5.9552108 |
| H | -4.0351609 | 3.3373651  | -4.6459028 |
| C | -0.9776819 | 3.1327501  | 3.2162972  |
| C | -2.5853409 | -4.5035129 | 0.3560832  |
| C | -2.2321839 | -3.8992749 | 2.7532862  |
| C | -0.3084829 | -4.7464579 | 1.3991742  |
| C | -1.5991859 | -3.9321929 | 1.3686982  |
| N | -1.2805229 | -2.5320319 | 1.0313572  |
| O | -0.3958199 | -2.8319809 | -1.0598968 |
| C | -0.6680049 | -2.1236019 | -0.0871048 |
| O | -4.7763659 | 3.2237171  | 0.1903392  |
| C | -1.3088469 | 2.1881141  | 0.0994082  |
| C | -2.3804679 | 3.2600141  | 0.2749442  |
| C | -3.7499729 | 2.6879291  | 0.5595452  |
| C | -3.7685609 | 1.4647471  | 1.3831262  |

|    |            |            |            |
|----|------------|------------|------------|
| C  | -2.6376059 | 0.8408881  | 1.7194362  |
| C  | -1.2365239 | 1.2591501  | 1.3414542  |
| C  | -0.5658469 | 1.8569861  | 2.5805592  |
| C  | 0.4425311  | 1.0731121  | 2.9759972  |
| O  | 1.4935041  | -0.8837909 | 1.9869502  |
| C  | 0.6224761  | -0.0251959 | 2.0298482  |
| N  | -0.3988359 | 0.0813561  | 1.1001212  |
| C  | -0.2871919 | -0.6412499 | -0.1474228 |
| C  | -1.5475379 | 1.3379861  | -1.1207158 |
| C  | -1.0615669 | 0.0631811  | -1.1984708 |
| N  | -1.3572929 | -0.5064509 | -2.4072008 |
| C  | -2.9457339 | 2.6478131  | -2.9420948 |
| C  | -2.2212989 | 1.5846891  | -2.3752448 |
| C  | -2.0743179 | 0.4013641  | -3.1495998 |
| C  | -2.6024339 | 0.2623701  | -4.4317678 |
| C  | -3.3010919 | 1.3343981  | -4.9576218 |
| C  | -3.4717759 | 2.5131411  | -4.2150978 |
| Au | 3.1564401  | 0.6134141  | -0.1929598 |
| C  | 5.1040201  | -2.9579789 | -1.2739328 |
| C  | 6.0643001  | -2.0580199 | -1.5967018 |
| H  | 5.0853181  | -4.0354119 | -1.3481548 |
| H  | 7.0576301  | -2.1897429 | -2.0000818 |
| C  | 4.2981611  | -0.9193579 | -0.8041168 |
| N  | 5.5501151  | -0.8106979 | -1.3045658 |
| N  | 4.0290101  | -2.2424039 | -0.7854618 |
| C  | 1.9811641  | 4.8030241  | 0.1214292  |
| F  | 0.6557421  | 4.8766491  | 0.2647082  |

|   |            |            |            |
|---|------------|------------|------------|
| F | 2.2613801  | 4.6264931  | -1.1601158 |
| F | 2.5153041  | 5.9404761  | 0.5328842  |
| S | 2.6447691  | 3.4145441  | 1.1225242  |
| O | 2.1513511  | 3.6652621  | 2.4694212  |
| O | 4.0811941  | 3.4067421  | 0.8748572  |
| O | 1.9324851  | 2.2464881  | 0.4468142  |
| C | 6.2651611  | 0.4495201  | -1.4471048 |
| H | 7.1569791  | 0.2826451  | -2.0551628 |
| H | 5.6225901  | 1.1846611  | -1.9376808 |
| H | 6.5544891  | 0.8379331  | -0.4662158 |
| C | 2.7718791  | -2.8387439 | -0.3426088 |
| H | 2.0225031  | -2.8189199 | -1.1416508 |
| H | 2.9641081  | -3.8755829 | -0.0554188 |
| H | 2.3894081  | -2.2887129 | 0.5243872  |
| H | -2.4378769 | 3.9036621  | -0.6061008 |
| F | -2.6809139 | -0.2339139 | 2.5181912  |
| H | 1.1174501  | 1.2520261  | 3.8042522  |

Zero-point correction= 0.603374 (Hartree/Particle)

Thermal correction to Energy= 0.648654

Thermal correction to Enthalpy= 0.649598

Thermal correction to Gibbs Free Energy= 0.520652

Sum of electronic and zero-point Energies= -2818.642128

Sum of electronic and thermal Energies= -2818.596849

Sum of electronic and thermal Enthalpies= -2818.595905

Sum of electronic and thermal Free Energies= -2818.724851

### **G-1**

|    |           |            |            |
|----|-----------|------------|------------|
| Au | 3.2599891 | -1.1451399 | -0.8297414 |
|----|-----------|------------|------------|

|   |            |            |            |
|---|------------|------------|------------|
| C | 4.6193541  | 2.8366041  | -1.1098964 |
| C | 5.4950751  | 2.3800931  | -0.1821594 |
| H | 4.4680371  | 3.8227641  | -1.5240294 |
| H | 6.2721911  | 2.8838451  | 0.3738736  |
| C | 4.2286871  | 0.6496821  | -0.8398854 |
| N | 5.2455231  | 1.0294611  | -0.0339914 |
| N | 3.8569671  | 1.7589751  | -1.5083274 |
| C | -1.1911449 | 4.4911041  | 0.8989176  |
| F | -0.2535079 | 4.1883111  | 1.7989326  |
| F | -2.3691489 | 4.4921631  | 1.5067766  |
| F | -0.9464409 | 5.7085091  | 0.4329506  |
| S | -1.1736319 | 3.2632481  | -0.4632634 |
| O | 0.1829771  | 3.3994101  | -1.0281294 |
| O | -2.2674319 | 3.7252791  | -1.3315854 |
| O | -1.4018759 | 1.9848741  | 0.2400976  |
| C | 5.8861321  | 0.1802011  | 0.9538006  |
| H | 5.8507801  | -0.8572489 | 0.6112546  |
| H | 6.9297491  | 0.4820061  | 1.0714026  |
| H | 5.3695921  | 0.2605851  | 1.9167656  |
| C | 2.7243001  | 1.8654241  | -2.4240854 |
| H | 2.9991661  | 2.5228671  | -3.2525874 |
| H | 2.4981891  | 0.8726161  | -2.8245354 |
| H | 1.8527851  | 2.2835231  | -1.8977364 |
| C | -6.5533759 | -1.2513319 | 1.2102166  |
| C | -6.6447419 | -2.6225209 | 0.9088196  |
| C | -5.5301509 | -3.3553789 | 0.5390346  |
| C | -4.3118749 | -2.6777009 | 0.4783186  |

|   |            |            |            |
|---|------------|------------|------------|
| C | -4.1928209 | -1.3030049 | 0.7931046  |
| C | -5.3423539 | -0.5869019 | 1.1559076  |
| N | -3.0575069 | -3.1267009 | 0.1326556  |
| C | -2.1545519 | -2.0799129 | 0.2511066  |
| C | -2.8149909 | -0.9501449 | 0.6499106  |
| C | -0.7254769 | -2.2883089 | -0.1113524 |
| N | -0.4001699 | -1.8812279 | -1.5102144 |
| C | 0.7960571  | -2.2309159 | -2.0681794 |
| C | -1.1776699 | -0.8897899 | -2.1975624 |
| O | 1.1601561  | -1.9984209 | -3.2077614 |
| C | 1.7458981  | -2.8438799 | -1.1095504 |
| C | 2.4493421  | -3.3562019 | -0.2421034 |
| C | -2.5135809 | -1.1031199 | -2.5314714 |
| C | -3.2670769 | -0.0361609 | -2.9855514 |
| C | -2.7160279 | 1.2408661  | -3.1444904 |
| C | -1.3427899 | 1.3842631  | -2.9554364 |
| C | -0.5909349 | 0.3445591  | -2.4414634 |
| O | -3.5103749 | 2.2844421  | -3.4312074 |
| H | -0.5165729 | -3.3638019 | -0.0346224 |
| C | 0.1477681  | -1.6948029 | 1.0132416  |
| O | 0.4634521  | -2.4547429 | 1.9200846  |
| N | 0.5156761  | -0.3918339 | 0.9140506  |
| C | 1.1091931  | 0.3736711  | 2.0459716  |
| C | 2.2211721  | -0.4117829 | 2.7389586  |
| C | 1.7189101  | 1.6452231  | 1.4639946  |
| C | -0.0021089 | 0.7218011  | 3.0330786  |
| C | 3.1049691  | -4.0597099 | 0.8479926  |

|   |            |            |            |
|---|------------|------------|------------|
| H | -7.4537849 | -0.7084769 | 1.4876546  |
| H | -7.6125389 | -3.1160339 | 0.9621776  |
| H | -5.6026899 | -4.4143849 | 0.2998886  |
| H | -5.2743749 | 0.4738271  | 1.3857686  |
| H | -2.8075509 | -4.0882649 | -0.0370964 |
| H | -2.3925679 | 0.0458291  | 0.7443136  |
| H | -0.8926319 | 2.3609981  | -3.1079444 |
| H | -3.1677479 | 3.0331411  | -2.9034614 |
| H | -0.0229679 | 0.2015661  | 0.2763746  |
| H | 2.9363441  | -0.8015619 | 1.9962216  |
| H | 2.7632101  | 0.2744231  | 3.4039246  |
| H | 1.8419371  | -1.2534069 | 3.3201156  |
| H | 1.9543011  | 2.3428241  | 2.2767816  |
| H | 1.0436831  | 2.1573581  | 0.7725036  |
| H | 2.6525851  | 1.4174241  | 0.9332186  |
| H | 0.4124401  | 1.2502001  | 3.9010356  |
| H | -0.4989739 | -0.1892209 | 3.3873076  |
| H | -0.7435439 | 1.3706661  | 2.5526116  |
| H | 2.3285231  | -4.5082809 | 1.4780446  |
| H | 3.6673091  | -3.3634939 | 1.4791606  |
| H | 3.7844271  | -4.8347299 | 0.4807466  |
| H | 0.4501551  | 0.5056461  | -2.1752144 |
| H | -3.0040149 | -2.0588839 | -2.3669374 |
| F | -4.5652779 | -0.2128489 | -3.2274954 |

Zero-point correction= 0.599824 (Hartree/Particle)

Thermal correction to Energy= 0.647296

Thermal correction to Enthalpy= 0.648240

Thermal correction to Gibbs Free Energy= 0.517274

Sum of electronic and zero-point Energies= -2818.546043

Sum of electronic and thermal Energies= -2818.498571

Sum of electronic and thermal Enthalpies= -2818.497627

Sum of electronic and thermal Free Energies= -2818.628593

**G-ts1**

|   |            |            |            |
|---|------------|------------|------------|
| H | -1.0119032 | -4.3734018 | 0.7282250  |
| H | -2.6817712 | -4.6401238 | 1.2826620  |
| H | -2.2729202 | -4.8382398 | -0.4424440 |
| H | 0.2465098  | 5.5058442  | -0.4243940 |
| H | 0.4092118  | 3.7935812  | -0.7862860 |
| H | -1.0366472 | 4.3894232  | 0.0864840  |
| H | 2.7905268  | 4.2378232  | 2.0711430  |
| H | 2.6142408  | 3.5289422  | 0.4573610  |
| H | 2.5947898  | 5.2960842  | 0.6576270  |
| H | 0.8608788  | 5.4241242  | 3.1840160  |
| H | -0.7113352 | 5.5400032  | 2.3523450  |
| H | 0.6936448  | 6.4524682  | 1.7546010  |
| H | 0.1688368  | 3.2814422  | 3.0254090  |
| H | 3.5258668  | -4.3542138 | 1.4154550  |
| H | 1.2579618  | -1.3884968 | -1.2291390 |
| H | 2.7608238  | -3.2218938 | -0.4558600 |
| H | -0.4220492 | -1.1291488 | 2.7247420  |
| H | -0.6565152 | 1.9164362  | -0.3273070 |
| H | 2.7658868  | 0.5561772  | 1.2247190  |
| H | 0.8251498  | 1.9843822  | -2.2466080 |
| H | 5.4247858  | 0.2191642  | -0.0895320 |



|   |            |            |            |
|---|------------|------------|------------|
| H | 2.9900998  | 2.0956882  | -4.0639700 |
| H | 5.4052678  | 1.5230262  | -4.1967840 |
| H | 6.5954148  | 0.5820472  | -2.2476910 |
| C | -2.0712342 | -4.2545518 | 0.4606030  |
| C | 0.0484128  | 4.5007032  | -0.0337540 |
| C | 2.2818238  | 4.3447182  | 1.1059780  |
| C | 0.3748898  | 5.5052102  | 2.2029660  |
| C | 0.7683018  | 4.3357342  | 1.3001730  |
| N | 0.3218608  | 3.1277242  | 2.0344670  |
| O | -0.6471782 | 1.1906302  | 2.5945130  |
| C | -0.1147592 | 1.8722322  | 1.7315850  |
| O | 2.7328618  | -4.2313078 | 2.0104600  |
| C | 1.1910628  | -1.7611418 | -0.2083230 |
| C | 2.0178398  | -2.7923328 | 0.2115820  |
| C | 1.9700868  | -3.2616748 | 1.5335630  |
| C | 1.0351078  | -2.6666308 | 2.3983360  |
| C | 0.2305758  | -1.6173058 | 2.0070430  |
| C | 0.3101318  | -1.1620638 | 0.6886950  |
| C | -2.2915712 | -2.8368328 | 0.2489460  |
| C | -2.2623642 | -1.6097278 | 0.1307990  |
| O | -2.6405322 | 0.7009102  | -0.1603490 |
| C | -1.8339282 | -0.1961138 | 0.0748300  |
| N | -0.5081712 | -0.0543988 | 0.2678240  |
| C | 0.0283128  | 1.3255422  | 0.2973070  |
| C | 2.5944988  | 0.9372402  | 0.2232090  |
| C | 1.3957958  | 1.3582992  | -0.2846000 |
| N | 1.5634698  | 1.6989452  | -1.6227140 |

|    |            |            |            |
|----|------------|------------|------------|
| C  | 4.9123818  | 0.6716892  | -0.9356040 |
| C  | 3.5549468  | 1.0102472  | -0.8348030 |
| C  | 2.8795498  | 1.5023192  | -1.9774420 |
| C  | 3.5239598  | 1.7093352  | -3.1977920 |
| C  | 4.8684738  | 1.3859842  | -3.2604200 |
| C  | 5.5510218  | 0.8640772  | -2.1468280 |
| Au | -4.4239122 | -1.8557578 | -0.2390720 |
| C  | -8.5617122 | -1.3130348 | -1.0780240 |
| C  | -8.1619592 | -0.0272808 | -0.9332740 |
| H  | -9.5289292 | -1.7381018 | -1.3042350 |
| H  | -8.7105142 | 0.9008022  | -1.0054050 |
| C  | -6.3656182 | -1.3305098 | -0.6180370 |
| N  | -6.8102472 | -0.0563148 | -0.6522010 |
| N  | -7.4429232 | -2.1004578 | -0.8811050 |
| C  | 6.1308198  | -2.7697938 | -1.1856050 |
| F  | 6.9733598  | -1.7362698 | -1.2527960 |
| F  | 5.0443988  | -2.4668488 | -1.8987130 |
| F  | 6.7193508  | -3.8184778 | -1.7492410 |
| S  | 5.6897128  | -3.1127718 | 0.5606560  |
| O  | 6.9706478  | -3.3907798 | 1.1984510  |
| O  | 4.7953378  | -4.2962558 | 0.3901170  |
| O  | 4.9759348  | -1.8988988 | 0.9800050  |
| C  | -6.0048362 | 1.1364462  | -0.4047120 |
| H  | -4.9422822 | 0.8730652  | -0.3604070 |
| H  | -6.1611202 | 1.8504542  | -1.2174430 |
| H  | -6.3011132 | 1.5919232  | 0.5441800  |
| C  | -7.4463872 | -3.5517038 | -0.9531390 |

|   |            |            |            |
|---|------------|------------|------------|
| H | -7.7820762 | -3.8777478 | -1.9414190 |
| H | -6.4297702 | -3.9129898 | -0.7832340 |
| H | -8.1073522 | -3.9655358 | -0.1865500 |
| F | 0.9588108  | -3.1117578 | 3.6561790  |

Zero-point correction= 0.597494 (Hartree/Particle)

Thermal correction to Energy= 0.645392

Thermal correction to Enthalpy= 0.646337

Thermal correction to Gibbs Free Energy= 0.509464

Sum of electronic and zero-point Energies= -2818.516389

Sum of electronic and thermal Energies= -2818.468491

Sum of electronic and thermal Enthalpies= -2818.467546

Sum of electronic and thermal Free Energies= -2818.604419

### **G-int1**

|   |            |            |            |
|---|------------|------------|------------|
| H | 0.6947203  | -3.5565818 | -1.7261119 |
| H | 1.4780783  | -2.9302388 | -3.1754809 |
| H | 2.4651203  | -3.3868578 | -1.7706029 |
| H | -0.6202607 | 5.5127492  | 0.8568641  |
| H | -0.5109937 | 3.7597522  | 0.9471601  |
| H | 0.3790933  | 4.6513952  | -0.3247609 |
| H | -3.9266327 | 4.3428852  | -0.4913009 |
| H | -3.0137907 | 3.3987732  | 0.7040971  |
| H | -3.1579987 | 5.1637532  | 0.8829611  |
| H | -2.7236897 | 5.8721342  | -2.1086519 |
| H | -0.9536037 | 6.0358212  | -2.0233899 |
| H | -1.9833457 | 6.7019692  | -0.7329239 |
| H | -2.2705357 | 3.6881622  | -2.5133299 |
| H | -4.0664087 | -3.2044098 | -2.0985469 |

|   |            |            |            |
|---|------------|------------|------------|
| H | -0.5542687 | -1.3820548 | 0.3482571  |
| H | -2.5325167 | -2.6482048 | -0.4031659 |
| H | 0.3743493  | 2.4117422  | -0.3692979 |
| H | -3.1897397 | 0.7805012  | -0.2966659 |
| H | 0.4252613  | 1.2077422  | 1.8384971  |
| H | -4.7054247 | -0.4429618 | 1.9437791  |
| H | -0.3689307 | 0.1573592  | 4.3984181  |
| H | -2.3226997 | -0.9027638 | 5.5056591  |
| H | -4.4577347 | -1.2150358 | 4.2942161  |
| C | 1.5215263  | -2.9255358 | -2.0784209 |
| C | -0.5541037 | 4.6026512  | 0.2494161  |
| C | -3.0426977 | 4.3480342  | 0.1582121  |
| C | -1.8600187 | 5.8660972  | -1.4306779 |
| C | -1.7717477 | 4.5470462  | -0.6642399 |
| N | -1.6782197 | 3.5011382  | -1.7097229 |
| O | -1.4397207 | 1.5771042  | -2.8277069 |
| C | -1.1933087 | 2.2323382  | -1.8236809 |
| O | -3.2643437 | -2.7777118 | -2.9464659 |
| C | -0.8292877 | -1.4210818 | -0.7052869 |
| C | -1.8864257 | -2.1425648 | -1.1147509 |
| C | -2.2459287 | -2.1868598 | -2.5146779 |
| C | -1.3726707 | -1.5099488 | -3.4560129 |
| C | -0.3378977 | -0.7567468 | -3.0606849 |
| C | 0.1130483  | -0.7386898 | -1.6448549 |
| C | 1.4391043  | -1.5464598 | -1.5325739 |
| C | 2.3811753  | -0.8318128 | -0.8956859 |
| O | 2.2376853  | 1.3353402  | 0.2006661  |

|    |            |            |            |
|----|------------|------------|------------|
| C  | 1.7826143  | 0.4700362  | -0.5402179 |
| N  | 0.5359033  | 0.5717112  | -1.1586709 |
| C  | -0.3420647 | 1.6532712  | -0.7059299 |
| C  | -2.4762437 | 0.8018992  | 0.5206721  |
| C  | -1.1766867 | 1.2273472  | 0.4556281  |
| N  | -0.5578997 | 1.0256152  | 1.6783001  |
| C  | -3.7727197 | -0.3041718 | 2.4844091  |
| C  | -2.6815417 | 0.2947582  | 1.8423521  |
| C  | -1.4596827 | 0.4448362  | 2.5444001  |
| C  | -1.3107997 | 0.0309292  | 3.8687971  |
| C  | -2.4073107 | -0.5590178 | 4.4770131  |
| C  | -3.6232317 | -0.7313288 | 3.7914371  |
| Au | 4.3060793  | -1.2262928 | -0.3111799 |
| C  | 8.2138973  | -1.0189178 | 1.4131101  |
| C  | 8.3201193  | -2.2483208 | 0.8570171  |
| H  | 8.9167643  | -0.4363508 | 1.9913181  |
| H  | 9.1339303  | -2.9591948 | 0.8504581  |
| C  | 6.2582873  | -1.4640058 | 0.3781031  |
| N  | 7.1144343  | -2.5021508 | 0.2287871  |
| N  | 6.9470683  | -0.5553728 | 1.1099821  |
| C  | -5.2929967 | -3.3402028 | 1.1722511  |
| F  | -5.8961897 | -2.5952758 | 2.0914131  |
| F  | -3.9933057 | -3.3893118 | 1.4466961  |
| F  | -5.7897707 | -4.5635018 | 1.2148571  |
| S  | -5.5683397 | -2.5911958 | -0.4822729 |
| O  | -7.0014277 | -2.6209658 | -0.6811159 |
| O  | -4.8204357 | -3.6271478 | -1.3332679 |

|   |            |            |            |
|---|------------|------------|------------|
| O | -4.8588847 | -1.3161398 | -0.4605829 |
| C | 6.8113273  | -3.7247518 | -0.4918029 |
| H | 5.7970703  | -3.6449058 | -0.8903979 |
| H | 7.5142293  | -3.8615858 | -1.3189709 |
| H | 6.8678963  | -4.5859918 | 0.1806181  |
| C | 6.4319213  | 0.7396782  | 1.5248851  |
| H | 7.0444493  | 1.5412552  | 1.1017181  |
| H | 5.4046353  | 0.8439112  | 1.1635041  |
| H | 6.4383643  | 0.8137382  | 2.6163331  |
| H | 0.2431403  | -0.1923238 | -3.7837289 |
| F | -1.7268197 | -1.5885318 | -4.7344479 |

Zero-point correction= 0.598872 (Hartree/Particle)

Thermal correction to Energy= 0.645402

Thermal correction to Enthalpy= 0.646346

Thermal correction to Gibbs Free Energy= 0.513975

Sum of electronic and zero-point Energies= -2818.564708

Sum of electronic and thermal Energies= -2818.518177

Sum of electronic and thermal Enthalpies= -2818.517233

Sum of electronic and thermal Free Energies= -2818.649605

## **G-ts2**

|   |            |            |            |
|---|------------|------------|------------|
| H | -0.4626693 | -2.0881266 | -2.2623337 |
| H | 0.1317847  | -0.8507756 | -3.3645067 |
| H | 1.2785137  | -1.9835416 | -2.6109447 |
| H | 2.9203557  | 4.0044224  | -1.6113237 |
| H | 1.7572877  | 2.6913104  | -1.3436067 |
| H | 1.3676567  | 4.0161054  | -2.4691597 |
| H | 1.4511447  | 4.7954854  | 1.7733163  |

|   |            |            |            |
|---|------------|------------|------------|
| H | 2.0890187  | 3.2413164  | 1.1567493  |
| H | 2.9748887  | 4.7319014  | 0.8733113  |
| H | 0.9580897  | 6.6822284  | 0.1100803  |
| H | 0.8467847  | 6.3192384  | -1.6309037 |
| H | 2.4251947  | 6.3332434  | -0.8304597 |
| H | -0.7916313 | 5.0526464  | -0.7373377 |
| H | -4.4631953 | -1.1772166 | -2.8241587 |
| H | -1.2604153 | -0.9934406 | 0.4953383  |
| H | -3.3154393 | -1.5699786 | -0.7896117 |
| H | -0.3716713 | 2.1963984  | -2.3631307 |
| H | 0.3048547  | 2.5431044  | 1.7373993  |
| H | -3.2850493 | 1.3819284  | 0.4833733  |
| H | -0.2001693 | 0.7544644  | 3.2344393  |
| H | -4.9855293 | -0.9402716 | 1.4324553  |
| H | -1.3721413 | -1.2215056 | 4.9157083  |
| H | -3.3632793 | -2.7171866 | 5.0161563  |
| H | -5.1358113 | -2.5769676 | 3.3026273  |
| C | 0.3698807  | -1.3961916 | -2.4426747 |
| C | 1.8531047  | 3.7689534  | -1.5161537 |
| C | 1.9659777  | 4.3071184  | 0.9362093  |
| C | 1.3706147  | 6.0679674  | -0.6992027 |
| C | 1.2381187  | 4.5798964  | -0.3769107 |
| N | -0.2232283 | 4.3450314  | -0.2832797 |
| O | -2.2662413 | 3.5986514  | 0.2678163  |
| C | -1.0562163 | 3.4411604  | 0.3078393  |
| O | -3.8714123 | -0.4045966 | -3.1420147 |
| C | -1.6415073 | -0.2888146 | -0.2495477 |

|    |            |            |            |
|----|------------|------------|------------|
| C  | -2.6593723 | -0.7660486 | -1.1118837 |
| C  | -2.9399383 | -0.1028826 | -2.2931967 |
| C  | -2.1025663 | 1.0349444  | -2.6802807 |
| C  | -0.9878653 | 1.3680224  | -2.0242357 |
| C  | -0.5170303 | 0.5412494  | -0.8745867 |
| C  | 0.5793977  | -0.4762046 | -1.2959707 |
| C  | 1.6442237  | -0.4156486 | -0.4703897 |
| O  | 1.9627407  | 0.9194664  | 1.5553803  |
| C  | 1.3666077  | 0.6359944  | 0.5237933  |
| N  | 0.2244887  | 1.3246444  | 0.1023863  |
| C  | -0.4588063 | 2.2240964  | 1.0169503  |
| C  | -2.6386883 | 0.8190214  | 1.1474353  |
| C  | -1.4691083 | 1.3807104  | 1.7060333  |
| N  | -1.1169623 | 0.6878544  | 2.8067243  |
| C  | -4.2037603 | -1.0067336 | 2.1876073  |
| C  | -3.0874693 | -0.1759786 | 2.1169643  |
| C  | -2.0917703 | -0.2701626 | 3.1057153  |
| C  | -2.1544323 | -1.1681166 | 4.1624373  |
| C  | -3.2704733 | -1.9947946 | 4.2088003  |
| C  | -4.2774723 | -1.9133166 | 3.2391533  |
| Au | 3.3585377  | -1.5388906 | -0.3868037 |
| C  | 7.0777807  | -3.4881016 | 0.4851173  |
| C  | 6.7390607  | -4.1793656 | -0.6281257 |
| H  | 7.9361447  | -3.5647796 | 1.1370223  |
| H  | 7.2407877  | -4.9832446 | -1.1474767 |
| C  | 5.1055157  | -2.6686766 | -0.2458207 |
| N  | 5.5308287  | -3.6640686 | -1.0600047 |



|   |            |            |            |
|---|------------|------------|------------|
| N | 6.0673557  | -2.5694576 | 0.7024753  |
| C | -5.9174493 | -3.3507236 | -0.0617767 |
| F | -6.5919593 | -3.1494366 | 1.0705723  |
| F | -4.6156403 | -3.4001846 | 0.2441093  |
| F | -6.2704403 | -4.5232376 | -0.5637957 |
| S | -6.2544793 | -1.9883086 | -1.2455107 |
| O | -7.6691203 | -2.1220006 | -1.5500117 |
| O | -5.3177663 | -2.3451596 | -2.3564457 |
| O | -5.8159283 | -0.7858496 | -0.5222677 |
| C | 4.8180347  | -4.1377856 | -2.2328497 |
| H | 3.8928627  | -3.5640726 | -2.3289187 |
| H | 5.4265247  | -3.9934076 | -3.1305107 |
| H | 4.5737887  | -5.1986066 | -2.1243907 |
| C | 6.0466757  | -1.6273036 | 1.8083123  |
| H | 6.9155627  | -0.9646156 | 1.7559293  |
| H | 5.1335097  | -1.0299056 | 1.7407833  |
| H | 6.0553917  | -2.1645716 | 2.7612443  |
| F | -2.5049883 | 1.7116764  | -3.7452477 |

Zero-point correction= 0.601245 (Hartree/Particle)

Thermal correction to Energy= 0.646898

Thermal correction to Enthalpy= 0.647842

Thermal correction to Gibbs Free Energy= 0.517698

Sum of electronic and zero-point Energies= -2818.540780

Sum of electronic and thermal Energies= -2818.495127

Sum of electronic and thermal Enthalpies= -2818.494183

Sum of electronic and thermal Free Energies= -2818.624327

**G-int2**

|   |            |            |            |
|---|------------|------------|------------|
| H | -0.4417123 | -2.3850611 | -1.7856637 |
| H | 0.0553007  | -1.2929241 | -3.0681157 |
| H | 1.2766037  | -2.2989461 | -2.2472777 |
| H | 3.1247707  | 3.4839479  | -2.1320827 |
| H | 1.8874557  | 2.3367039  | -1.5900797 |
| H | 1.5232157  | 3.4935199  | -2.8939017 |
| H | 1.9633447  | 4.9529649  | 1.1412963  |
| H | 2.3625987  | 3.2443379  | 0.7892903  |
| H | 3.4092477  | 4.5312619  | 0.2083983  |
| H | 1.5292007  | 6.5681059  | -0.7753967 |
| H | 1.2688857  | 5.9407849  | -2.4246387 |
| H | 2.8914787  | 5.9283469  | -1.7171607 |
| H | -0.4049853 | 5.0959589  | -1.1125777 |
| H | -4.1279243 | -1.6849661 | -2.7526427 |
| H | -1.2541153 | -0.8203321 | 0.7131313  |
| H | -3.1704523 | -1.7086791 | -0.5862177 |
| H | -0.3117123 | 1.9739759  | -2.4716167 |
| H | 0.5101767  | 2.6353599  | 1.6162843  |
| H | -2.9201213 | 1.6378589  | -0.0563907 |
| H | -0.9870003 | 1.8958339  | 3.4826673  |
| H | -4.9810733 | -0.5402171 | 0.7683133  |
| H | -2.8490943 | 0.6223569  | 5.1737813  |
| H | -4.9302113 | -0.7545351 | 5.0728013  |
| H | -5.9548583 | -1.3258551 | 2.8949763  |
| C | 0.3640757  | -1.7106291 | -2.1019887 |
| C | 2.0517397  | 3.3603139  | -1.9415267 |
| C | 2.3611017  | 4.2627809  | 0.3863013  |

|   |            |            |            |
|---|------------|------------|------------|
| C | 1.8284467  | 5.7931639  | -1.4917357 |
| C | 1.5884647  | 4.3962659  | -0.9216147 |
| N | 0.1188047  | 4.3281459  | -0.7042397 |
| O | -1.8689133 | 3.9770449  | 0.2958943  |
| C | -0.7064883 | 3.6289809  | 0.1109453  |
| O | -3.6202253 | -0.9114961 | -3.1314067 |
| C | -1.6476043 | -0.1519381 | -0.0684817 |
| C | -2.5872843 | -0.8751221 | -0.9670187 |
| C | -2.7935383 | -0.4230191 | -2.2280217 |
| C | -1.9874423 | 0.7161489  | -2.6968597 |
| C | -0.9030923 | 1.1643449  | -2.0537337 |
| C | -0.4321483 | 0.4509869  | -0.8180707 |
| C | 0.6099447  | -0.6460581 | -1.0957487 |
| C | 1.6937857  | -0.5280311 | -0.2971817 |
| O | 2.1432147  | 1.0815839  | 1.4889933  |
| C | 1.4924857  | 0.6577609  | 0.5437433  |
| N | 0.3428557  | 1.3173999  | 0.0742783  |
| C | -0.2429653 | 2.3747169  | 0.8550653  |
| C | -2.4440603 | 1.0105989  | 0.7056983  |
| C | -1.4485823 | 1.7668659  | 1.4837153  |
| N | -1.6172533 | 1.5533699  | 2.7647593  |
| C | -4.5010133 | -0.2908841 | 1.7165853  |
| C | -3.3366133 | 0.4579729  | 1.7704533  |
| C | -2.7762363 | 0.7678469  | 3.0124033  |
| C | -3.3075243 | 0.3625539  | 4.2229563  |
| C | -4.4702513 | -0.4028491 | 4.1529963  |
| C | -5.0523863 | -0.7207191 | 2.9248843  |

|    |            |            |            |
|----|------------|------------|------------|
| Au | 3.3441797  | -1.7271111 | -0.0835697 |
| C  | 6.9858477  | -3.7510931 | 0.9429863  |
| C  | 6.5270787  | -4.6132371 | 0.0060373  |
| H  | 7.8810237  | -3.7675971 | 1.5480373  |
| H  | 6.9391727  | -5.5368481 | -0.3745337 |
| C  | 5.0230537  | -2.9379311 | 0.1783943  |
| N  | 5.3269317  | -4.0992431 | -0.4493387 |
| N  | 6.0532827  | -2.7342241 | 1.0342453  |
| C  | -5.5920193 | -3.6109361 | 0.3526883  |
| F  | -6.5100823 | -3.3570121 | 1.2869873  |
| F  | -4.4072813 | -3.2112081 | 0.8389813  |
| F  | -5.5355833 | -4.9202751 | 0.1620253  |
| S  | -5.9981013 | -2.7178251 | -1.2009287 |
| O  | -7.2377363 | -3.3368201 | -1.6447737 |
| O  | -4.7947463 | -3.0087901 | -2.0289157 |
| O  | -6.0632403 | -1.3145831 | -0.7651107 |
| C  | 4.5041907  | -4.7326851 | -1.4644927 |
| H  | 3.6149327  | -4.1171411 | -1.6215487 |
| H  | 5.0575017  | -4.8134571 | -2.4048187 |
| H  | 4.1971277  | -5.7296461 | -1.1350317 |
| C  | 6.1692977  | -1.6005371 | 1.9348373  |
| H  | 7.0648847  | -1.0186411 | 1.6973053  |
| H  | 5.2857777  | -0.9680851 | 1.8139283  |
| H  | 6.2244917  | -1.9469041 | 2.9711423  |
| F  | -2.3803043 | 1.2739249  | -3.8337557 |

Zero-point correction= 0.602331 (Hartree/Particle)

Thermal correction to Energy= 0.648489

Thermal correction to Enthalpy= 0.649434

Thermal correction to Gibbs Free Energy= 0.516043

Sum of electronic and zero-point Energies= -2818.546494

Sum of electronic and thermal Energies= -2818.500335

Sum of electronic and thermal Enthalpies= -2818.499391

Sum of electronic and thermal Free Energies= -2818.632781

### **G-ts3**

|   |            |            |            |
|---|------------|------------|------------|
| H | 0.3488321  | -3.4371832 | 0.8245104  |
| H | -0.2946639 | -3.1310182 | 2.4320634  |
| H | -1.3776739 | -3.7198502 | 1.1488424  |
| H | -3.0515409 | 4.8859688  | 0.4945124  |
| H | -2.4025389 | 3.2400678  | 0.5245474  |
| H | -2.4785949 | 4.1926598  | 2.0236244  |
| H | 0.3902161  | 5.4056958  | -0.9535576 |
| H | -0.6763109 | 4.0153478  | -1.3298796 |
| H | -1.3368729 | 5.6408558  | -1.2684566 |
| H | 0.1334931  | 6.7092958  | 1.1601014  |
| H | -1.0714599 | 6.2180628  | 2.3786054  |
| H | -1.6008209 | 6.8943608  | 0.8299634  |
| H | 0.5525521  | 4.5571198  | 2.2114594  |
| H | 4.7079711  | -1.8172382 | 2.1436924  |
| H | 1.0787711  | -1.6615122 | -0.5885776 |
| H | 3.4701051  | -1.7371362 | 0.2163524  |
| H | -0.7260919 | 2.3308638  | -0.3413666 |
| H | 2.8172791  | 0.2631578  | 0.4129864  |
| H | 1.6034951  | 3.4194298  | -1.4676906 |
| H | 3.9077031  | -1.4630622 | -1.9069366 |

|   |            |            |            |
|---|------------|------------|------------|
| H | 3.6830791  | 3.3388928  | -3.3681426 |
| H | 5.3475911  | 1.7659038  | -4.3493406 |
| H | 5.4541991  | -0.5916252 | -3.5910116 |
| C | -0.5320519 | -3.0583562 | 1.3623454  |
| C | -2.2833159 | 4.2459078  | 0.9460764  |
| C | -0.6071469 | 4.9716858  | -0.7978346 |
| C | -0.8527609 | 6.2502858  | 1.3040174  |
| C | -0.9039369 | 4.8504498  | 0.6967764  |
| N | 0.1589821  | 4.0900258  | 1.4002024  |
| O | 1.1572081  | 2.3001448  | 2.3430354  |
| C | 0.4622431  | 2.7617148  | 1.4556054  |
| O | 3.9779931  | -1.6181932 | 2.8085204  |
| C | 1.4026921  | -0.9009122 | 0.1354424  |
| C | 2.7017061  | -1.2752882 | 0.8343434  |
| C | 2.8650021  | -1.3084192 | 2.2012814  |
| C | 1.7670301  | -0.8726072 | 3.0498484  |
| C | 0.5960381  | -0.4763292 | 2.5510274  |
| C | 0.2149351  | -0.5838632 | 1.1005434  |
| C | -0.8606869 | -1.6618662 | 0.9751014  |
| C | -2.0247439 | -1.1707632 | 0.5085614  |
| O | -2.5908229 | 1.0851168  | -0.2328546 |
| C | -1.8239649 | 0.2705678  | 0.2655064  |
| N | -0.5371739 | 0.6055258  | 0.6923034  |
| C | 0.0429911  | 1.8562348  | 0.2816554  |
| C | 1.9316661  | 0.3458028  | -0.5540316 |
| C | 1.2531911  | 1.5851608  | -0.5353946 |
| N | 1.8432411  | 2.4393528  | -1.3825856 |

|    |            |            |            |
|----|------------|------------|------------|
| C  | 3.8255101  | -0.4238492 | -2.2253146 |
| C  | 2.8886791  | 0.4476188  | -1.6771846 |
| C  | 2.8567171  | 1.7870208  | -2.1015816 |
| C  | 3.7204661  | 2.2963048  | -3.0613866 |
| C  | 4.6440181  | 1.4099168  | -3.6012156 |
| C  | 4.6970621  | 0.0742078  | -3.1863496 |
| Au | -3.8309169 | -2.0259952 | 0.0594744  |
| C  | -7.8407399 | -2.8318172 | -1.2047646 |
| C  | -7.5107739 | -4.0834642 | -0.8091716 |
| H  | -8.7550319 | -2.4355582 | -1.6228556 |
| H  | -8.0772449 | -5.0036712 | -0.8113016 |
| C  | -5.7135909 | -2.7642552 | -0.4511936 |
| N  | -6.2069919 | -4.0214202 | -0.3517486 |
| N  | -6.7301399 | -2.0398942 | -0.9784886 |
| C  | 7.0371851  | -4.0172922 | 0.1403444  |
| F  | 7.2064521  | -4.7773312 | -0.9354056 |
| F  | 6.4620351  | -4.7491682 | 1.0899654  |
| F  | 8.2268801  | -3.6198982 | 0.5735054  |
| S  | 5.9878361  | -2.5718442 | -0.2676146 |
| O  | 6.7311671  | -1.8475642 | -1.2945116 |
| O  | 5.8881821  | -1.8665422 | 1.0395014  |
| O  | 4.7154311  | -3.1806222 | -0.6969996 |
| C  | -5.4678469 | -5.1590152 | 0.1639974  |
| H  | -4.4704309 | -4.8176002 | 0.4517604  |
| H  | -5.9737339 | -5.5744442 | 1.0406614  |
| H  | -5.3762779 | -5.9323722 | -0.6045046 |
| C  | -6.6693089 | -0.6173272 | -1.2707656 |

|   |            |            |            |
|---|------------|------------|------------|
| H | -5.6749929 | -0.2459762 | -1.0058306 |
| H | -6.8453209 | -0.4447362 | -2.3366796 |
| H | -7.4216789 | -0.0800902 | -0.6856346 |
| H | -0.1747119 | -0.1027422 | 3.2207104  |
| F | 2.0150831  | -0.8310132 | 4.3547914  |

Zero-point correction= 0.596838 (Hartree/Particle)

Thermal correction to Energy= 0.643157

Thermal correction to Enthalpy= 0.644102

Thermal correction to Gibbs Free Energy= 0.509259

Sum of electronic and zero-point Energies= -2818.500112

Sum of electronic and thermal Energies= -2818.453792

Sum of electronic and thermal Enthalpies= -2818.452847

Sum of electronic and thermal Free Energies= -2818.587690

### **G-int3**

|   |            |            |            |
|---|------------|------------|------------|
| H | 0.1817757  | -3.6236254 | -0.1046521 |
| H | 0.3353127  | -3.3011984 | 1.6299849  |
| H | -1.2338763 | -3.7751074 | 0.9406849  |
| H | -3.1450793 | 4.9137576  | -0.6429891 |
| H | -2.5807063 | 3.2685496  | -0.2660501 |
| H | -3.0293993 | 4.3701716  | 1.0426979  |
| H | 0.5350027  | 5.3529636  | -1.1769801 |
| H | -0.3795403 | 3.9255386  | -1.7065391 |
| H | -1.0664263 | 5.5354336  | -1.9072421 |
| H | -0.1676943 | 6.7187106  | 0.7759609  |
| H | -1.6742443 | 6.3417866  | 1.6508459  |
| H | -1.7430693 | 6.9419926  | -0.0134201 |
| H | -0.3317403 | 4.5548496  | 2.0547779  |



|   |            |            |            |
|---|------------|------------|------------|
| H | 5.4745407  | -2.1801874 | 0.9553319  |
| H | 1.0552507  | -1.0427184 | -1.3791771 |
| H | 2.0865857  | -2.7319584 | 0.0628029  |
| H | -0.6755773 | 2.2745086  | -0.7249301 |
| H | 1.8976417  | 3.8412306  | -0.0982361 |
| H | 4.6819877  | -0.6027454 | -1.4378851 |
| H | 4.5490187  | 4.3718506  | -0.8652361 |
| H | 6.6499867  | 3.2019006  | -1.5104091 |
| H | 6.6795497  | 0.7428216  | -1.7887431 |
| C | -0.3294643 | -3.1833804 | 0.7637959  |
| C | -2.5487923 | 4.3160246  | 0.0579799  |
| C | -0.4670803 | 4.9094386  | -1.2356181 |
| C | -1.1774973 | 6.3023586  | 0.6728329  |
| C | -1.1299013 | 4.8729366  | 0.1389009  |
| N | -0.3175363 | 4.1170866  | 1.1369799  |
| O | -0.1008213 | 2.2923116  | 2.4565179  |
| C | -0.2190133 | 2.7537896  | 1.3368849  |
| O | 4.2098927  | -1.6857754 | 1.7511119  |
| C | 1.4840637  | -0.7020884 | -0.4231391 |
| C | 2.5273987  | -1.7260164 | 0.0267419  |
| C | 3.0566797  | -1.4460564 | 1.4008799  |
| C | 2.0848197  | -0.9162374 | 2.3568089  |
| C | 0.8498237  | -0.5358074 | 2.0068839  |
| C | 0.3229587  | -0.6236564 | 0.6001869  |
| C | -0.7034253 | -1.7616454 | 0.5241319  |
| C | -1.9392343 | -1.2988194 | 0.2523179  |
| O | -2.7112783 | 0.9694586  | -0.2267101 |

|    |            |            |            |
|----|------------|------------|------------|
| C  | -1.8377823 | 0.1662826  | 0.0804869  |
| N  | -0.5250023 | 0.5230836  | 0.3093079  |
| C  | -0.0659183 | 1.8655386  | 0.0938669  |
| C  | 2.0872957  | 0.6722736  | -0.5677431 |
| C  | 1.3743977  | 1.8073156  | -0.2916141 |
| N  | 2.1686657  | 2.9209436  | -0.4156571 |
| C  | 4.6224637  | 0.4716436  | -1.2820371 |
| C  | 3.4275767  | 1.1036546  | -0.8938431 |
| C  | 3.4386227  | 2.5169516  | -0.7645321 |
| C  | 4.5777047  | 3.2900056  | -0.9783351 |
| C  | 5.7403037  | 2.6313896  | -1.3389231 |
| C  | 5.7567427  | 1.2365956  | -1.4935131 |
| Au | -3.7801083 | -2.1622674 | 0.0132919  |
| C  | -7.9538183 | -2.7576134 | -0.6908261 |
| C  | -7.6262023 | -4.0494694 | -0.4541991 |
| H  | -8.9012053 | -2.2965244 | -0.9309201 |
| H  | -8.2280473 | -4.9469164 | -0.4452571 |
| C  | -5.7377523 | -2.8257934 | -0.2662401 |
| N  | -6.2672633 | -4.0701024 | -0.1967061 |
| N  | -6.7874643 | -2.0249204 | -0.5715521 |
| C  | 5.3280457  | -4.9542174 | 0.2090239  |
| F  | 5.0048077  | -5.8556954 | -0.7004521 |
| F  | 4.2272847  | -4.5376434 | 0.8270079  |
| F  | 6.1506787  | -5.4847104 | 1.0909739  |
| S  | 6.1177627  | -3.5208004 | -0.6264771 |
| O  | 7.4008927  | -3.9578924 | -1.1128361 |
| O  | 6.3405797  | -2.5761604 | 0.6006899  |

|   |            |            |            |
|---|------------|------------|------------|
| O | 5.0954267  | -2.9970994 | -1.5150441 |
| C | -5.5109573 | -5.2698504 | 0.1085589  |
| H | -4.4673383 | -4.9852624 | 0.2630939  |
| H | -5.8952903 | -5.7403654 | 1.0185979  |
| H | -5.5723653 | -5.9795964 | -0.7219511 |
| C | -6.7071543 | -0.5835704 | -0.7507711 |
| H | -7.3482553 | -0.0788854 | -0.0219561 |
| H | -5.6715223 | -0.2635734 | -0.6002461 |
| H | -7.0230623 | -0.3134044 | -1.7627551 |
| H | 3.3610397  | -1.7986984 | -0.6740141 |
| H | 0.1786867  | -0.1203084 | 2.7550159  |
| F | 2.5166417  | -0.8067864 | 3.6104009  |

Zero-point correction= 0.603027 (Hartree/Particle)

Thermal correction to Energy= 0.649248

Thermal correction to Enthalpy= 0.650192

Thermal correction to Gibbs Free Energy= 0.517707

Sum of electronic and zero-point Energies= -2818.586952

Sum of electronic and thermal Energies= -2818.540731

Sum of electronic and thermal Enthalpies= -2818.539787

Sum of electronic and thermal Free Energies= -2818.672273

#### **G-int4**

|   |            |            |            |
|---|------------|------------|------------|
| H | 0.9381846  | -0.2258974 | -3.4019995 |
| H | 1.0455886  | 1.4005886  | -2.7124005 |
| H | 2.4529866  | 0.3131086  | -2.6638605 |
| H | -4.2785134 | 2.9847226  | 4.2938895  |
| H | -4.7633134 | 1.3358976  | 3.8393245  |
| H | -3.1173444 | 1.6446276  | 4.4489315  |

|   |            |            |            |
|---|------------|------------|------------|
| H | -4.2515374 | 2.9992616  | 0.5167645  |
| H | -5.4227624 | 2.1008076  | 1.5225985  |
| H | -4.9732664 | 3.7638716  | 1.9449965  |
| H | -1.9973724 | 3.5434966  | 1.3815265  |
| H | -1.4516174 | 2.9502756  | 2.9758465  |
| H | -2.6512454 | 4.2608176  | 2.8654015  |
| H | -3.4770044 | 0.7455396  | 0.9563005  |
| H | -0.9941894 | -1.6348614 | -2.1851865 |
| H | -1.1787544 | 0.3687546  | -3.5318655 |
| H | -1.3126974 | -1.7132294 | 2.0502005  |
| H | -4.1286424 | -2.1270884 | 1.8345965  |
| H | -3.9340234 | -2.0301384 | -3.5591695 |
| H | -6.4191524 | -3.2130374 | 0.6260915  |
| H | -7.3765134 | -3.7031174 | -1.6159625 |
| H | -6.1321094 | -3.1208924 | -3.6708595 |
| C | 1.3629006  | 0.3574716  | -2.5724585 |
| C | -3.9302304 | 2.0496976  | 3.8381225  |
| C | -4.5914774 | 2.8177006  | 1.5457535  |
| C | -2.3090204 | 3.3237726  | 2.4089735  |
| C | -3.4483794 | 2.3081446  | 2.4142795  |
| N | -3.0136264 | 1.0319986  | 1.8101665  |
| O | -1.2207784 | 0.5715636  | 3.1530165  |
| C | -1.9384944 | 0.3061556  | 2.2035765  |
| O | -3.5481914 | 1.9856346  | -2.8560585 |
| C | -1.5359444 | -0.7898504 | -1.7282465 |
| C | -2.0169024 | 0.1272276  | -2.8623345 |
| C | -2.5776494 | 1.4393966  | -2.3754755 |

|    |            |            |            |
|----|------------|------------|------------|
| C  | -1.7920014 | 2.0552896  | -1.2868565 |
| C  | -0.8592414 | 1.4001146  | -0.5938045 |
| C  | -0.5255274 | -0.0551504 | -0.7955095 |
| C  | 0.9272446  | -0.1826074 | -1.2564475 |
| C  | 1.6893186  | -0.8012684 | -0.3293375 |
| O  | 1.0709656  | -1.8525994 | 1.7873155  |
| C  | 0.8002056  | -1.1943534 | 0.7991485  |
| N  | -0.4574054 | -0.6921944 | 0.5110185  |
| C  | -1.6189944 | -0.9357134 | 1.3325365  |
| C  | -2.6897244 | -1.3388264 | -0.9338265 |
| C  | -2.7065984 | -1.3994654 | 0.4337665  |
| N  | -3.8826164 | -1.9668314 | 0.8701275  |
| C  | -4.4678924 | -2.2577214 | -2.6391345 |
| C  | -3.9146064 | -1.9497794 | -1.3870025 |
| C  | -4.6392404 | -2.3212164 | -0.2261555 |
| C  | -5.8840814 | -2.9438654 | -0.2821805 |
| C  | -6.4076764 | -3.2162284 | -1.5350045 |
| C  | -5.7019224 | -2.8819864 | -2.7013015 |
| Au | 3.6665486  | -1.3614994 | -0.1811775 |
| C  | 7.3654136  | -2.9158494 | 1.2633465  |
| C  | 7.8601776  | -2.1642054 | 0.2513825  |
| H  | 7.8595476  | -3.5331764 | 1.9997225  |
| H  | 8.8755696  | -1.9833784 | -0.0707265 |
| C  | 5.6183006  | -1.9574304 | 0.2106215  |
| N  | 6.7754436  | -1.5897304 | -0.3831815 |
| N  | 5.9912396  | -2.7754684 | 1.2235375  |
| C  | 4.3451166  | 3.9841956  | -0.6786755 |

|   |            |            |            |
|---|------------|------------|------------|
| F | 3.3790786  | 4.3810896  | -1.4824425 |
| F | 5.5116756  | 4.3982726  | -1.1436085 |
| F | 4.1519446  | 4.4604976  | 0.5335375  |
| S | 4.4068416  | 2.1461476  | -0.6295995 |
| O | 2.9455086  | 1.9679676  | -0.0435475 |
| O | 5.4282446  | 1.7761546  | 0.3277705  |
| O | 4.4854266  | 1.6756136  | -2.0000385 |
| C | 6.8777406  | -0.6433264 | -1.4817565 |
| H | 5.8990206  | -0.5427024 | -1.9562475 |
| H | 7.1786856  | 0.3392696  | -1.1065645 |
| H | 7.6054186  | -1.0081884 | -2.2119995 |
| C | 5.0743816  | -3.4274634 | 2.1453745  |
| H | 5.4062586  | -3.2600704 | 3.1738645  |
| H | 4.0755736  | -2.9985124 | 2.0203015  |
| H | 5.0324196  | -4.5026274 | 1.9461175  |
| H | -2.7857914 | -0.3525184 | -3.4733785 |
| H | 2.6390506  | 1.0205956  | -0.1116545 |
| H | -0.3108994 | 1.9077546  | 0.2022205  |
| F | -2.1070514 | 3.3205726  | -1.0050315 |

Zero-point correction= 0.601503 (Hartree/Particle)

Thermal correction to Energy= 0.648255

Thermal correction to Enthalpy= 0.649199

Thermal correction to Gibbs Free Energy= 0.516462

Sum of electronic and zero-point Energies= -2818.590902

Sum of electronic and thermal Energies= -2818.544151

Sum of electronic and thermal Enthalpies= -2818.543206

Sum of electronic and thermal Free Energies= -2818.675943

**G-ts4**

|   |            |            |            |
|---|------------|------------|------------|
| H | 1.1913528  | -0.8304633 | -3.0961975 |
| H | 0.6215298  | 0.8423857  | -3.2101125 |
| H | 2.2668048  | 0.4769517  | -2.5959245 |
| H | -3.7411142 | 5.0272297  | 1.6987055  |
| H | -3.2424312 | 3.9442607  | 0.3783605  |
| H | -4.3022532 | 3.3392857  | 1.6727415  |
| H | -0.1580962 | 4.2195707  | 2.4908915  |
| H | -0.8317632 | 4.4950107  | 0.8629675  |
| H | -1.3065622 | 5.5415797  | 2.2114975  |
| H | -1.6329002 | 3.3423477  | 4.3344815  |
| H | -3.3371252 | 2.9426117  | 4.0118365  |
| H | -2.8126152 | 4.6432737  | 4.0577355  |
| H | -0.8731412 | 2.1175647  | 1.4942415  |
| H | -0.7933132 | -2.0760953 | -1.3564665 |
| H | -0.9490862 | -0.9499223 | -3.5277945 |
| H | -1.5839562 | -0.7119913 | 2.2848935  |
| H | -4.5327892 | -0.8276653 | 1.9254975  |
| H | -3.7539462 | -3.2532463 | -2.8418305 |
| H | -6.6933772 | -2.5266283 | 1.1451275  |
| H | -7.4598062 | -3.8995013 | -0.7851215 |
| H | -5.9832512 | -4.2521003 | -2.7376525 |
| C | 1.2194328  | 0.1521747  | -2.6033245 |
| C | -3.4559952 | 3.9968447  | 1.4542495  |
| C | -1.0601382 | 4.5101177  | 1.9373665  |
| C | -2.5226302 | 3.6278897  | 3.7608655  |
| C | -2.2286472 | 3.5905287  | 2.2650945  |

|    |            |            |            |
|----|------------|------------|------------|
| N  | -1.8084522 | 2.2326587  | 1.8620885  |
| O  | -3.6837852 | 1.0668377  | 2.4486045  |
| C  | -2.5656342 | 1.1239457  | 1.9449325  |
| O  | -3.5827312 | 0.2019477  | -4.0301765 |
| C  | -1.5094822 | -1.2410093 | -1.4457125 |
| C  | -1.8609062 | -1.0628253 | -2.9258665 |
| C  | -2.7162352 | 0.1526557  | -3.1863455 |
| C  | -2.3474042 | 1.3363037  | -2.3706055 |
| C  | -1.4554682 | 1.2983357  | -1.3785735 |
| C  | -0.7932912 | 0.0330887  | -0.8989985 |
| C  | 0.6984458  | 0.0393517  | -1.2211935 |
| C  | 1.4521018  | -0.0356513 | -0.0908325 |
| O  | 0.7816168  | -0.2750953 | 2.2469745  |
| C  | 0.5258548  | -0.1161833 | 1.0673405  |
| N  | -0.7582472 | 0.0226867  | 0.5631145  |
| C  | -1.9276182 | -0.1641063 | 1.3903255  |
| C  | -2.7353602 | -1.5082623 | -0.6163555 |
| C  | -2.9162222 | -0.9773913 | 0.6322985  |
| N  | -4.1319102 | -1.3387473 | 1.1470405  |
| C  | -4.3788442 | -3.0631473 | -1.9727075 |
| C  | -3.9308972 | -2.2629263 | -0.9092355 |
| C  | -4.7893152 | -2.1044003 | 0.2107485  |
| C  | -6.0585162 | -2.6753843 | 0.2745265  |
| C  | -6.4745732 | -3.4397253 | -0.8018955 |
| C  | -5.6370662 | -3.6366753 | -1.9107085 |
| Au | 3.2199398  | -1.2488063 | 0.1457105  |
| C  | 6.2129668  | -3.9525363 | 1.4615945  |



|   |            |            |            |
|---|------------|------------|------------|
| C | 6.8876988  | -3.3543283 | 0.4504605  |
| H | 6.5087358  | -4.7223613 | 2.1594915  |
| H | 7.8986608  | -3.4872813 | 0.0934165  |
| C | 4.8318228  | -2.4571403 | 0.5077695  |
| N | 6.0239338  | -2.4447443 | -0.1250875 |
| N | 4.9525688  | -3.3868953 | 1.4829575  |
| C | 4.8679518  | 3.4433327  | -1.4376705 |
| F | 3.9134618  | 3.8352867  | -2.2681355 |
| F | 6.0307758  | 3.4624377  | -2.0728395 |
| F | 4.9189908  | 4.2702457  | -0.4073515 |
| S | 4.5372718  | 1.7318297  | -0.8628855 |
| O | 3.1916558  | 1.9323177  | -0.1884895 |
| O | 5.6207028  | 1.4072977  | 0.0575465  |
| O | 4.4320288  | 0.9250417  | -2.0834035 |
| C | 6.3898868  | -1.5216453 | -1.1940035 |
| H | 7.1404678  | -1.9987493 | -1.8287515 |
| H | 5.5043248  | -1.2757673 | -1.7844925 |
| H | 6.7741798  | -0.5881133 | -0.7717555 |
| C | 3.9038368  | -3.7553303 | 2.4189245  |
| H | 3.4744018  | -4.7260673 | 2.1531805  |
| H | 4.3159918  | -3.8030263 | 3.4304605  |
| H | 3.1211028  | -2.9925053 | 2.3901365  |
| H | -2.3871982 | -1.9323553 | -3.3247975 |
| H | 2.4375858  | 0.8643037  | -0.1095685 |
| H | -1.2094582 | 2.2201417  | -0.8521935 |
| F | -2.9545312 | 2.4671207  | -2.7011435 |

Zero-point correction= 0.596480 (Hartree/Particle)

Thermal correction to Energy= 0.642629

Thermal correction to Enthalpy= 0.643573

Thermal correction to Gibbs Free Energy= 0.511615

Sum of electronic and zero-point Energies= -2818.589235

Sum of electronic and thermal Energies= -2818.543087

Sum of electronic and thermal Enthalpies= -2818.542143

Sum of electronic and thermal Free Energies= -2818.674101

## G-2

|   |            |            |            |
|---|------------|------------|------------|
| H | -0.8693346 | -3.9945697 | -2.5886010 |
| H | -2.3488706 | -3.2059567 | -3.1990870 |
| H | -0.8631196 | -3.2527557 | -4.1814810 |
| H | -2.5851986 | 5.7051673  | -0.8579100 |
| H | -3.3699036 | 4.1314633  | -0.5973470 |
| H | -2.0375576 | 4.6447563  | 0.4635400  |
| H | -1.2575006 | 3.5591913  | -3.6362490 |
| H | -2.9137256 | 3.4551763  | -2.9792990 |
| H | -2.1637246 | 5.0368093  | -3.2656660 |
| H | 0.6504434  | 4.2473583  | -2.1407150 |
| H | 0.3294964  | 4.7728543  | -0.4658410 |
| H | -0.1959626 | 5.7844723  | -1.8313470 |
| H | -1.2405316 | 1.9184763  | -1.8919680 |
| H | -0.4127336 | -2.6543997 | -0.0297590 |
| H | -2.3020416 | -3.8667847 | -0.9928050 |
| H | 0.7647634  | 0.6905343  | 0.3092740  |
| H | -1.0278016 | 1.5673003  | 2.5835480  |
| H | -2.9672986 | -3.4966357 | 2.6006300  |
| H | -2.2014126 | 0.8015593  | 5.0496460  |

|   |            |            |            |
|---|------------|------------|------------|
| H | -3.3743276 | -1.1087357 | 6.1351930  |
| H | -3.7356386 | -3.2207517 | 4.8982920  |
| C | -1.2546196 | -3.1423977 | -3.1662980 |
| C | -2.4116426 | 4.6628973  | -0.5636080 |
| C | -1.9687376 | 4.0116883  | -2.9326020 |
| C | -0.0713906 | 4.7513143  | -1.4847420 |
| C | -1.4106416 | 4.0193933  | -1.5159130 |
| N | -1.2029346 | 2.6046423  | -1.1484870 |
| O | -0.4159906 | 2.8801643  | 0.9820310  |
| C | -0.6656936 | 2.1734393  | 0.0029350  |
| O | -4.8803256 | -3.0888697 | 0.0804910  |
| C | -1.3819886 | -2.1393417 | -0.0547680 |
| C | -2.4870906 | -3.1901967 | -0.1488030 |
| C | -3.8586256 | -2.5973617 | -0.3471900 |
| C | -3.8762516 | -1.3736037 | -1.1884800 |
| C | -2.7761696 | -0.7630847 | -1.6363430 |
| C | -1.3783926 | -1.2326837 | -1.3164600 |
| C | -0.7731086 | -1.8738547 | -2.5651760 |
| C | 0.2554114  | -1.1436447 | -3.0123970 |
| O | 1.4220284  | 0.7868023  | -2.0981870 |
| C | 0.5153944  | -0.0371257 | -2.0968290 |
| N | -0.4924696 | -0.0678547 | -1.1450480 |
| C | -0.3196646 | 0.6827803  | 0.0791160  |
| C | -1.5274056 | -1.2698187 | 1.1656750  |
| C | -1.0421986 | 0.0075323  | 1.1863470  |
| N | -1.2568266 | 0.5981593  | 2.4022820  |
| C | -2.7759976 | -2.5557427 | 3.1087310  |

|    |            |            |            |
|----|------------|------------|------------|
| C  | -2.1093836 | -1.4963147 | 2.4687630  |
| C  | -1.9199396 | -0.2964727 | 3.2074110  |
| C  | -2.3635266 | -0.1340237 | 4.5186100  |
| C  | -3.0138036 | -1.2004887 | 5.1133610  |
| C  | -3.2166766 | -2.3987307 | 4.4111340  |
| Au | 3.0796404  | -0.7279387 | 0.1070230  |
| C  | 5.0778854  | 2.7669003  | 1.3278980  |
| C  | 5.9874964  | 1.8371933  | 1.7064480  |
| H  | 5.0888094  | 3.8445343  | 1.4024140  |
| H  | 6.9545814  | 1.9365623  | 2.1774630  |
| C  | 4.2525884  | 0.7559043  | 0.7754760  |
| N  | 5.4652624  | 0.6073083  | 1.3568460  |
| N  | 4.0216704  | 2.0865283  | 0.7551060  |
| C  | 1.8299824  | -4.8586117 | -0.2038760 |
| F  | 0.5004244  | -4.8992077 | -0.3176830 |
| F  | 2.1413154  | -4.6670107 | 1.0687480  |
| F  | 2.3255824  | -6.0169417 | -0.6052060 |
| S  | 2.5073244  | -3.5037847 | -1.2408960 |
| O  | 1.9906464  | -3.7665147 | -2.5758530 |
| O  | 3.9465844  | -3.5196717 | -1.0099940 |
| O  | 1.8264904  | -2.3103767 | -0.5775110 |
| C  | 6.1189414  | -0.6682047 | 1.6069270  |
| H  | 7.1912084  | -0.5674747 | 1.4203920  |
| H  | 5.9545184  | -0.9863017 | 2.6407640  |
| H  | 5.7055764  | -1.4211137 | 0.9301630  |
| C  | 2.8220614  | 2.7239633  | 0.2217550  |
| H  | 2.0434654  | 2.8008283  | 0.9897750  |

|   |            |            |            |
|---|------------|------------|------------|
| H | 3.0857264  | 3.7264883  | -0.1251590 |
| H | 2.4409724  | 2.1396593  | -0.6235290 |
| H | -2.5050836 | -3.8276267 | 0.7384570  |
| H | 0.8916824  | -1.3702757 | -3.8597630 |
| H | -2.8801776 | 0.1066063  | -2.2854320 |
| F | -5.0845366 | -0.9131537 | -1.4883560 |

Zero-point correction= 0.603775 (Hartree/Particle)

Thermal correction to Energy= 0.649675

Thermal correction to Enthalpy= 0.650619

Thermal correction to Gibbs Free Energy= 0.520510

Sum of electronic and zero-point Energies= -2818.632076

Sum of electronic and thermal Energies= -2818.586177

Sum of electronic and thermal Enthalpies= -2818.585232

Sum of electronic and thermal Free Energies= -2818.715341
